# Supplementary material for: Drosulfakinin signaling encodes early-life memory for adaptive social plasticity
Source: eLife. 2024 Dec 18;13:e103973. doi: 10.7554/eLife.103973 (PMC11706606; doi:10.7554/eLife.103973)
Supplement: Figure 1—source data 1. [file elife-103973-fig1-data1.xlsx]

## Sheet: Figure 1C_Raw Data
SD							Walking Speed							Centroid velocity
DGRP21	29.106	26.6751	27.9973	27.6985	28.6591		DGRP21	1.15085	1.16002	1.44372	1.55741	0.908265		DGRP21	0.372006	0.291426	0.21992	0.098726	0.469436
DGRP26	27.0612	28.9442	25.2431	27.817	23.8889		DGRP26	0.54429	0.394881	0.74669	1.08043	0.558955		DGRP26	0.323236	0.128169	0.11629	0.137547	0.287182
DGRP31	28.1202	28.7175	27.6105	29.9251	25.7236		DGRP31	0.943998	1.37567	0.357258	1.3688	0.364741		DGRP31	0.220039	0.223755	0.202081	0.329233	0.187013
DGRP32	28.8371	33.0645	30.9933	28.538	29.918		DGRP32	0.440995	1.5254	1.17822	1.43143	1.59145		DGRP32	0.381112	0.330368	0.385113	0.334789	0.317102
DGRP38	26.4755	30.8648	31.9764	29.54	31.9164		DGRP38	0.850315	1.49933	1.51955	0.635206	0.820135		DGRP38	0.287622	0.251039	0.255034	0.110381	0.182287
DGRP40	26.8999	25.6804	24.8605	26.5775	24.9807		DGRP40	0.599577	0.635959	1.32429	1.70106	0.144865		DGRP40	0.205774	0.231129	0.133061	0.389964	0.077951
DGRP41	26.2759	21.0067	25.5262	26.3661	24.1772		DGRP41	0.399411	0.461047	0.966691	1.13291	1.06197		DGRP41	0.115472	0.267619	0.30115	0.318544	0.276002
DGRP42	28.6171	26.6258	29.0513	29.3753	30.0386		DGRP42	0.646449	2.52414	0.835352	2.1161	0.257597		DGRP42	0.197843	0.320103	0.47084	0.416027	0.143672
DGRP45	30.3287	32.1022	31.9163	27.6393	22.693		DGRP45	1.17969	2.23145	1.36565	0.440309	0.852424		DGRP45	0.136102	0.238852	0.126987	0.234502	0.387798
DGRP48	29.7573	23.6873	25.5023	28.9104	23.6592		DGRP48	1.61282	0.676562	0.854319	0.548268	0.662743		DGRP48	0.287107	0.321157	0.322838	0.141662	0.306024
DGRP57	23.1546	22.5476	28.6076	24.8658	26.6899		DGRP57	0.957695	0.389322	0.38224	0.957262	0.460779		DGRP57	0.227544	0.15907	0.166655	0.194255	0.170658
DGRP59	31.0777	27.3776	32.786	27.8186	29.2574		DGRP59	1.00162	0.991431	1.70754	1.07275	0.496272		DGRP59	0.222753	0.43289	0.423753	0.145312	0.298019
DGRP69	23.8265	30.1754	30.4154	29.2521	28.8643		DGRP69	0.74188	1.65894	2.10821	0.674902	1.83786		DGRP69	0.455907	0.231701	0.203648	0.325923	0.308578
DGRP73	18.1753	22.4528	11.8765	21.6263	13.981		DGRP73	0.295538	0.661164	0.205024	0.182193	0.236565		DGRP73	0.059149	0.072855	0.052297	0.063477	0.061313
DGRP75	28.0632	29.3636	28.2371	29.5157	30.2478		DGRP75	1.07759	2.221	2.14905	1.44223	2.67818		DGRP75	0.344144	0.5266	0.571042	0.467642	0.439057
DGRP83	30.4067	28.7139	24.7699	31.8323	22.0265		DGRP83	1.00299	2.01074	0.423811	0.257424	0.583174		DGRP83	0.212563	0.19968	0.140254	0.170175	0.315208
DGRP88	29.9602	27.6493	31.7109	24.8658	30.4284		DGRP88	1.55311	1.05224	0.780032	0.327086	1.76761		DGRP88	0.214674	0.103973	0.251792	0.559803	0.328849
DGRP91	26.6525	20.5696	21.1388	23.9658	25.9378		DGRP91	0.936778	0.44397	0.138361	0.541493	1.15458		DGRP91	0.097309	0.215826	0.264064	0.21437	0.200855
DGRP93	26.2673	20.8562	26.3889	24.5396	17.975		DGRP93	1.0953	0.914612	1.06806	0.39173	0.647473		DGRP93	0.419916	0.411501	0.118012	0.117806	0.105492
DGRP100	26.5747	28.83	29.8333	25.5647	28.6572		DGRP100	0.84276	1.71983	1.72605	0.430152	0.998586		DGRP100	0.235408	0.420654	0.321995	0.40421	0.341976
DGRP101	26.1778	28.3048	29.2804	27.876	28.7306		DGRP101	1.29198	1.03368	1.59785	1.59998	1.37275		DGRP101	0.348834	0.382036	0.470937	0.451497	0.375483
DGRP105	25.0795	25.8902	27.8669	31.3091	27.1505		DGRP105	1.11541	1.0278	1.40743	1.84754	1.07061		DGRP105	0.230396	0.281789	0.200998	0.510879	0.388059
DGRP109	33.4969	22.1511	29.1809	28.0047	27.4623		DGRP109	3.19021	0.491057	2.30238	1.74477	2.60736		DGRP109	0.467186	0.360225	0.340874	0.29154	0.597752
DGRP129	28.2961	29.5662	25.8928	25.3358	26.9703		DGRP129	0.432544	0.34856	0.832428	0.601691	0.670834		DGRP129	0.119215	0.093219	0.194765	0.15638	0.183391
DGRP136	40.4684	26.9386	26.0252	32.234	27.8977		DGRP136	0.430044	0.94975	1.10634	1.24473	1.03825		DGRP136	0.234621	0.115048	0.386294	0.31649	0.386941
DGRP142	29.3336	30.8094	26.858	33.5438	32.6523		DGRP142	1.52314	0.961026	0.630416	1.86931	1.55032		DGRP142	0.264236	0.425403	0.368597	0.309208	0.350737
DGRP149	27.8276	20.8748	26.6772	27.4727	29.9223		DGRP149	0.793121	0.57374	0.944883	0.761668	1.66266		DGRP149	0.21448	0.324725	0.231473	0.407616	0.120192
DGRP153	28.446	20.2445	27.1403	30.1904	32.937		DGRP153	1.00498	0.614376	0.792003	1.24286	1.42571		DGRP153	0.249792	0.169414	0.185902	0.144682	0.413847
DGRP161	28.8335	32.6864	32.8204	26.7447	31.6865		DGRP161	1.3441	1.26515	1.45005	0.777718	2.46122		DGRP161	0.547039	0.576957	0.138234	0.203747	0.20069
DGRP176	31.9308	31.0807	24.8145	29.1897	20.1555		DGRP176	0.812155	0.887586	0.651026	1.07761	0.568504		DGRP176	0.295415	0.26646	0.24844	0.232039	0.165222
DGRP177	30.2764	30.6762	26.9895	25.8815	26.7199		DGRP177	0.211861	0.282531	0.158113	0.13686	0.092196		DGRP177	0.049951	0.064263	0.034797	0.028062	0.018381
DGRP181	32.4183	29.6854	29.1025	29.552	32.8913		DGRP181	3.36673	1.66349	1.67868	1.91816	2.92762		DGRP181	0.562883	0.383803	0.413507	0.475907	0.618445
DGRP189	32.7945	31.1649	30.2355	23.3455	28.3197		DGRP189	0.986502	0.706098	0.385447	0.508667	0.45718		DGRP189	0.135201	0.183156	0.150111	0.131373	0.131977
DGRP195	24.0252	29.3464	22.2367	24.9845	22.3311		DGRP195	0.283702	0.263989	0.333988	0.424898	0.370387		DGRP195	0.061009	0.058379	0.086079	0.084676	0.065918
DGRP208	23.0509	19.129	24.274	20.9233	28.3241		DGRP208	0.368649	0.390103	0.753844	0.767442	0.590484		DGRP208	0.100658	0.120269	0.080646	0.097256	0.184505
DGRP217	32.2264	31.1912	28.337	32.4389	30.2383		DGRP217	0.864586	0.849974	0.750431	0.888762	1.24618		DGRP217	0.315006	0.193068	0.146201	0.166317	0.149104
DGRP227	32.0493	23.6423	29.8742	32.0033	29.0248		DGRP227	2.92018	0.443234	1.08651	0.953671	0.450576		DGRP227	0.351513	0.301823	0.314625	0.211775	0.318748
DGRP228	27.7728	27.859	16.1882	28.1615	29.6444		DGRP228	0.346311	0.423591	0.494668	0.237472	0.417218		DGRP228	0.077405	0.062049	0.079273	0.157508	0.126795
DGRP229	30.0138	31.839	27.721	32.0169	26.9757		DGRP229	0.84178	1.88458	0.537289	0.870807	1.24349		DGRP229	0.26356	0.251808	0.538656	0.155176	0.257466
DGRP235	28.8889	31.0076	26.4772	26.3711	30.7166		DGRP235	1.34637	0.825213	0.430599	0.516512	0.496152		DGRP235	0.439233	0.14389	0.121624	0.087174	0.211109
DGRP239	26.7896	28.4301	31.5211	33.9578	31.1319		DGRP239	1.65652	1.4162	2.15271	2.74582	0.842832		DGRP239	0.46743	0.405019	0.5521	0.653137	0.18898
DGRP256	26.7677	18.6116	29.9532	30.1958	31.2386		DGRP256	0.752505	0.392951	1.34382	1.11975	1.42549		DGRP256	0.312643	0.296555	0.25742	0.426351	0.316122
DGRP280	31.4466	24.3968	23.7803	26.5869	33.4353		DGRP280	0.507299	0.887812	0.310468	0.385812	2.18007		DGRP280	0.147259	0.114717	0.21646	0.290192	0.161675
DGRP287	27.1524	32.4415	31.9297	30.8768	34.9674		DGRP287	0.98451	1.38302	0.515604	0.361605	0.768602		DGRP287	0.207976	0.281819	0.217484	0.237513	0.250663
DGRP301	28.8964	30.6392	23.6889	25.7753	30.6472		DGRP301	1.39693	0.31693	0.388077	0.509997	2.56346		DGRP301	0.347525	0.31706	0.345784	0.349266	0.263092
DGRP303	30.2905	30.8134	20.968	24.0592	26.6168		DGRP303	0.340199	0.495083	0.599429	0.266653	0.474971		DGRP303	0.090128	0.086499	0.08791	0.17703	0.026615
DGRP304	28.1166	27.4222	24.6792	27.0749	34.5558		DGRP304	0.344458	0.44348	0.493314	0.915655	0.478474		DGRP304	0.065483	0.13822	0.334066	0.112228	0.113639
DGRP306	29.0515	32.3934	20.8198	33.6038	29.8801		DGRP306	2.28965	2.64811	0.482102	0.664909	0.658601		DGRP306	0.604136	0.228698	0.178697	0.425873	0.059566
DGRP307	18.169	26.0472	30.0212	23.1109	28.7193		DGRP307	0.63505	1.04913	0.777867	0.945032	1.77628		DGRP307	0.215844	0.306561	0.120956	0.386642	0.129089
DGRP313	23.5439	26.9645	21.2146	24.9317	27.2308		DGRP313	0.675675	0.806561	0.614891	0.556115	1.41602		DGRP313	0.289061	0.34357	0.165178	0.111495	0.214938
DGRP315	30.4867	27.6948	27.3087	29.5895	24.0289		DGRP315	1.22449	1.1265	0.699792	1.31349	1.02442		DGRP315	0.121309	0.297547	0.153757	0.543771	0.416948
DGRP317	31.8181	32.0648	34.785	30.8015	30.6726		DGRP317	2.90917	3.07031	2.01724	1.88858	1.71367		DGRP317	0.436878	0.549831	0.490095	0.542049	0.544783
DGRP318	22.4735	28.8195	28.0897	30.6648	31.0389		DGRP318	0.394604	1.02398	0.496584	2.22211	1.53857		DGRP318	0.392671	0.325113	0.265862	0.303905	0.227601
DGRP319	24.8644	29.8925	32.3066	27.243	25.5628		DGRP319	0.917789	0.980853	0.578071	1.01274	0.588265		DGRP319	0.249386	0.220427	0.146673	0.113547	0.098755
DGRP320	25.6743	24.896	22.8439	29.4857	30.8209		DGRP320	0.562029	0.540591	0.377507	0.441859	0.228833		DGRP320	0.130408	0.12181	0.097243	0.129385	0.1257
DGRP321	25.0805	30.0764	25.8197	24.6923	32.6045		DGRP321	1.09894	0.527867	0.49183	0.422298	1.85901		DGRP321	0.249718	0.280854	0.328086	0.143816	0.399041
DGRP324	28.0141	27.9304	29.2176	24.9498	27.9047		DGRP324	1.7488	1.72694	1.6747	0.893365	1.99522		DGRP324	0.545821	0.518171	0.384776	0.688292	0.528091
DGRP332	24.0085	35.253	26.7573	31.6844	20.364		DGRP332	0.24608	0.246264	0.333004	0.328464	0.280433		DGRP332	0.0694	0.053019	0.074156	0.068167	0.054956
DGRP335	28.6535	29.8604	21.1949	30.0104	21.0021		DGRP335	0.616396	1.30608	0.22994	0.543856	0.116253		DGRP335	0.13107	0.165517	0.141152	0.242395	0.271381
DGRP336	28.0965	23.6239	34.187	26.8295	32.5972		DGRP336	0.775022	0.557904	0.606858	0.70259	0.557095		DGRP336	0.098776	0.136345	0.16716	0.263403	0.147953
DGRP338	34.3108	31.9707	34.4275	32.4824	26.364		DGRP338	0.642869	0.871115	0.670034	0.402973	0.716753		DGRP338	0.367459	0.114264	0.133238	0.135768	0.643211
DGRP340	26.8919	23.8276	22.7154	26.4099	29.589		DGRP340	1.1121	1.04831	0.646504	1.0095	1.79946		DGRP340	0.379866	0.468015	0.091531	0.073352	0.072084
DGRP348	31.7518	29.7785	26.502	30.6827	33.672		DGRP348	1.6808	0.909103	0.709449	1.21014	1.77494		DGRP348	0.312848	0.348022	0.240972	0.415747	0.321805
DGRP350	28.7905	26.0552	26.8685	25.1167	28.7845		DGRP350	0.305294	0.321095	0.353569	0.299745	1.11994		DGRP350	0.185625	0.133339	0.12704	0.25471	0.135649
DGRP352	24.4075	26.0676	27.132	27.1319	27.818		DGRP352	0.411988	1.23631	1.20864	1.24665	0.839418		DGRP352	0.251731	0.297598	0.420987	0.288123	0.167318
DGRP354	31.2792	29.6803	30.2033	32.4626	30.5239		DGRP354	0.548822	0.917855	0.374159	0.861219	1.60112		DGRP354	0.247019	0.132833	0.418194	0.22083	0.1387
DGRP356	30.5912	26.3773	25.2117	31.1757	23.9929		DGRP356	1.37189	0.582377	0.317672	1.04368	0.330321		DGRP356	0.168749	0.146347	0.349851	0.18508	0.071185
DGRP357	26.7424	27.7233	28.7056	31.9428	31.8428		DGRP357	1.26465	1.31039	1.16226	3.61429	1.59332		DGRP357	0.506847	0.516942	0.505817	0.468524	0.463991
DGRP359	33.2594	32.0831	31.9268	31.5965	33.0305		DGRP359	1.66623	1.46243	1.79599	1.62374	1.31316		DGRP359	0.498031	0.327536	0.452622	0.410997	0.256269
DGRP360	36.7794	34.1651	32.2683	32.0849	33.1104		DGRP360	2.61697	2.35545	1.7763	3.5022	2.79624		DGRP360	0.594474	0.623382	0.438577	0.418754	0.418754
DGRP361	28.3717	29.1684	28.1882	27.7651	25.9714		DGRP361	0.86481	0.894851	0.75517	0.637737	0.444809		DGRP361	0.118005	0.126908	0.187981	0.197711	0.15879
DGRP362	32.569	25.8661	30.9256	31.797	24.6561		DGRP362	0.959948	0.438004	1.91647	0.765828	0.406439		DGRP362	0.228355	0.239898	0.186588	0.268443	0.16308
DGRP365	29.9693	24.6483	27.5848	27.1369	28.0577		DGRP365	1.85258	0.831655	0.697528	1.21114	1.2727		DGRP365	0.206431	0.380233	0.425696	0.200775	0.408076
DGRP370	24.8011	20.626	24.28	23.2779	19.0041		DGRP370	0.250269	0.193151	0.295681	0.271313	0.225647		DGRP370	0.077605	0.071373	0.092885	0.11862	0.100123
DGRP371	30.0448	29.2667	31.2614	27.8963	33.2212		DGRP371	0.887277	1.14164	0.88975	0.731196	1.84088		DGRP371	0.235285	0.236308	0.345561	0.248992	0.177793
DGRP373	25.3813	29.9011	25.0413	27.6314	28.8727		DGRP373	0.309499	0.3788	0.243548	0.326244	0.605863		DGRP373	0.353551	0.14134	0.091467	0.087025	0.093284
DGRP374	31.6057	33.1072	32.4979	32.516	31.5306		DGRP374	1.34185	1.08133	0.649607	0.651654	0.634594		DGRP374	0.278546	0.475779	0.272291	0.121759	0.218291
DGRP375	16.8706	31.9233	31.2595	25.8882	28.7336		DGRP375	0.420291	2.16223	0.892422	0.683658	0.672158		DGRP375	0.316484	0.311631	0.225548	0.277029	0.157187
DGRP377	22.4404	27.6633	33.6884	31.9394	35.3276		DGRP377	0.484401	0.652273	0.561499	0.450307	0.491748		DGRP377	0.127586	0.165389	0.118135	0.152035	0.071703
DGRP379	25.9234	28.7191	31.8837	29.0497	31.8683		DGRP379	1.03703	0.628537	0.801879	0.922794	0.326925		DGRP379	0.245796	0.171593	0.154656	0.313949	0.336734
DGRP380	20.4639	20.669	28.1296	31.9301	21.5855		DGRP380	0.463617	0.4269	1.20776	0.231934	0.361712		DGRP380	0.143464	0.11237	0.274923	0.068288	0.100956
DGRP381	31.1487	30.9795	22.9023	22.9961	31.3033		DGRP381	1.1444	0.383963	0.368235	0.391677	0.781606		DGRP381	0.20252	0.18922	0.100152	0.147104	0.123124
DGRP382	30.1	29.9734	30.6036	30.6899	33.9959		DGRP382	1.79748	0.71534	0.338318	0.243265	0.242645		DGRP382	0.250079	0.143769	0.041645	0.173486	0.350111
DGRP383	27.7107	29.7753	31.3016	29.8449	31.9037		DGRP383	1.01873	1.22042	1.6761	0.652987	2.08912		DGRP383	0.159313	0.217594	0.117972	0.402316	0.298259
DGRP385	28.6428	29.1721	30.7213	29.6489	24.6435		DGRP385	0.640091	1.32409	2.16927	1.50524	1.45607		DGRP385	0.307751	0.409631	0.528597	0.341711	0.224432
DGRP386	24.6635	29.0518	21.123	30.5186	23.2174		DGRP386	0.746866	1.5633	0.436914	1.40468	0.581667		DGRP386	0.126276	0.342871	0.336102	0.342236	0.244938
DGRP390	20.4088	25.3754	25.7708	26.382	22.683		DGRP390	0.333509	0.292197	0.367146	0.553919	0.389278		DGRP390	0.085011	0.088349	0.113872	0.081477	0.26917
DGRP391	30.2162	28.9206	30.7745	31.9185	32.2003		DGRP391	2.22979	2.67092	2.49146	2.2646	2.15909		DGRP391	0.496228	0.475033	0.404237	0.313994	0.587782
DGRP392	30.7385	31.6284	32.1613	36.7407	29.3782		DGRP392	1.04613	1.80967	1.49917	1.85311	1.42617		DGRP392	0.299169	0.381999	0.301298	0.582155	0.282347
DGRP395	30.6735	26.7958	26.1382	28.3425	24.6111		DGRP395	1.19455	1.05178	0.827635	0.894653	0.532561		DGRP395	0.195202	0.227664	0.235303	0.21939	0.186078
DGRP397	25.6522	26.0944	24.0833	28.7555	30.0392		DGRP397	0.83623	0.812437	0.734383	0.696591	0.631014		DGRP397	0.153334	0.206501	0.271365	0.233723	0.218411
DGRP399	29.7898	21.337	23.4186	30.4615	28.575		DGRP399	0.920388	0.544086	1.42361	1.938	2.22767		DGRP399	0.32897	0.34431	0.385857	0.560782	0.408868
DGRP405	30.6237	25.8277	25.2477	29.6896	31.238		DGRP405	1.95139	0.935923	1.47531	1.4864	1.63697		DGRP405	0.508312	0.448739	0.282971	0.299591	0.463417
DGRP406	30.9784	26.1952	28.5506	21.1192	28.7828		DGRP406	0.740506	0.703123	0.457247	0.515704	1.40607		DGRP406	0.124567	0.134895	0.354309	0.4226	0.048478
DGRP409	27.6238	30.9556	22.3972	22.1736	27.0845		DGRP409	1.65464	1.96628	0.405292	0.41076	0.424304		DGRP409	0.129622	0.45893	0.234514	0.185262	0.156824
DGRP426	25.8834	25.2534	20.2192	25.7436	23.5558		DGRP426	1.31386	0.463032	0.299065	0.316203	0.307761		DGRP426	0.154619	0.249673	0.177033	0.146317	0.240541
DGRP427	32.6145	31.7933	28.7594	28.994	29.1103		DGRP427	1.05651	1.97592	1.63201	1.2856	1.4438		DGRP427	0.272962	0.315129	0.371426	0.213301	0.542335
DGRP437	30.5628	27.7616	18.6183	29.498	32.4524		DGRP437	0.81844	0.891822	0.414779	1.61954	0.266712		DGRP437	0.199391	0.269385	0.187344	0.149751	0.154735
DGRP440	27.6433	25.8243	23.9725	22.0305	20.6157		DGRP440	0.991342	0.748687	0.497215	0.368772	0.306317		DGRP440	0.176446	0.312406	0.061635	0.166576	0.031422
DGRP441	30.4266	25.6196	36.0878	29.5226	25.9986		DGRP441	0.555345	0.88631	0.401136	1.5462	1.21324		DGRP441	0.223991	0.178266	0.189748	0.255615	0.359956
DGRP443	28.8041	29.5492	30.8342	29.9695	29.6981		DGRP443	0.328773	0.702112	0.978037	0.745027	0.645303		DGRP443	0.382887	0.212424	0.227554	0.175507	0.203144
DGRP461	28.0712	32.8337	26.2333	31.179	24.3222		DGRP461	0.693183	0.328992	0.995209	2.40225	1.15923		DGRP461	0.237329	0.375133	0.164496	0.198015	0.208361
DGRP486	17.6201	20.4874	19.5709	19.3031	26.7259		DGRP486	0.436013	0.452641	0.444149	0.419953	0.984546		DGRP486	0.197374	0.209462	0.183826	0.158608	0.115882
DGRP491	25.9315	28.4544	28.806	27.6371	27.0031		DGRP491	0.552282	0.884743	1.45098	0.974779	1.13624		DGRP491	0.250854	0.249622	0.260913	0.305664	0.261734
DGRP492	24.1677	31.3325	26.765	26.2804	17.8563		DGRP492	0.146233	0.389172	0.099958	0.32909	0.126596		DGRP492	0.038232	0.102548	0.032457	0.095977	0.029271
DGRP502	24.8283	23.5553	27.7003	28.7149	29.759		DGRP502	0.453653	0.540365	0.52622	0.952657	0.991471		DGRP502	0.211263	0.150405	0.143028	0.112086	0.271097
DGRP505	31.9995	27.183	33.0039	29.2858	27.9495		DGRP505	0.908246	1.54397	1.42003	0.769362	1.63939		DGRP505	0.285524	0.427763	0.221725	0.24599	0.094756
DGRP508	27.1894	20.0389	29.0502	28.4165	26.1809		DGRP508	0.295703	0.411012	0.456952	0.389899	0.377565		DGRP508	0.076193	0.141136	0.051477	0.044659	0.054716
DGRP509	31.9989	29.7102	29.8364	31.6821	22.8801		DGRP509	2.69577	0.621099	0.522331	1.66375	0.176931		DGRP509	0.415635	0.223836	0.182828	0.291756	0.43443
DGRP513	29.5441	35.4862	23.5936	22.796	26.1874		DGRP513	1.67972	0.675378	0.40532	0.279013	0.696391		DGRP513	0.209261	0.279218	0.185602	0.309812	0.207017
DGRP517	27.5776	25.0105	24.4672	21.6919	27.6878		DGRP517	1.41442	2.03125	0.273473	0.277562	0.227353		DGRP517	0.294038	0.202007	0.209103	0.156514	0.261065
DGRP528	34.1953	28.5414	29.2979	33.94	30.5866		DGRP528	2.93425	1.5588	1.63049	2.18799	2.64944		DGRP528	0.431999	0.554027	0.364454	0.496074	0.617082
DGRP530	18.0189	23.9364	25.2928	28.4896	26.8244		DGRP530	0.826758	0.430917	0.428108	0.338289	1.02215		DGRP530	0.210825	0.274749	0.216328	0.138221	0.24321
DGRP535	21.0682	24.9414	29.4523	25.8895	32.2947		DGRP535	1.01688	1.42184	2.07535	1.60949	1.29615		DGRP535	0.467427	0.260971	0.274764	0.381823	0.274107
DGRP551	15.9614	18.1089	25.5994	24.3692	25.4253		DGRP551	0.217515	0.576465	1.31374	0.461832	0.353679		DGRP551	0.222711	0.098913	0.205914	0.117991	0.149925
DGRP555	31.2496	32.876	31.5276	31.4148	29.7812		DGRP555	1.03361	1.14823	1.26114	0.938415	0.895553		DGRP555	0.34642	0.315459	0.215647	0.336028	0.286446
DGRP559	26.8266	21.2019	26.9236	23.197	27.2481		DGRP559	1.46802	0.502366	1.77019	1.69707	1.0458		DGRP559	0.328343	0.313167	0.246924	0.202215	0.233593
DGRP563	24.7947	17.5728	18.4876	17.6847	24.8907		DGRP563	0.353252	0.338512	0.335346	0.276489	0.350944		DGRP563	0.112429	0.124263	0.155278	0.070599	0.117734
DGRP566	19.5534	22.2929	23.0475	17.5529	25.3142		DGRP566	0.656695	0.32014	0.539602	0.186654	0.402018		DGRP566	0.152841	0.095189	0.150145	0.056408	0.11966
DGRP584	28.7606	27.8134	25.4788	32.5814	34.9149		DGRP584	0.79139	1.31036	1.014	1.0231	1.02865		DGRP584	0.169027	0.179358	0.183491	0.274617	0.451082
DGRP589	27.4506	26.9683	27.0808	26.5006	27.0716		DGRP589	2.25166	1.89212	0.940081	0.913383	2.15923		DGRP589	0.338324	0.365147	0.312582	0.762094	0.371853
DGRP595	30.0467	27.0243	27.7457	30.4486	31.2784		DGRP595	1.01907	0.357247	0.39342	0.374346	0.786155		DGRP595	0.136972	0.184089	0.084435	0.115707	0.492433
DGRP596	25.944	26.9107	21.9341	28.1187	32.9483		DGRP596	0.810288	1.03676	0.594962	1.19225	0.724756		DGRP596	0.330722	0.270686	0.180318	0.193706	0.177598
DGRP627	34.0529	30.3498	25.633	33.1895	27.3908		DGRP627	1.01952	1.04642	0.875239	2.34634	1.45103		DGRP627	0.313194	0.152229	0.424581	0.44664	0.307297
DGRP630	28.6265	31.6665	20.219	25.5906	23.3619		DGRP630	0.878999	1.59183	0.52342	0.669788	0.697938		DGRP630	0.246998	0.38752	0.158887	0.257728	0.292807
DGRP634	29.8133	28.8363	31.3889	31.2351	31.2379		DGRP634	1.18257	0.994533	1.12466	1.37747	0.94793		DGRP634	0.225158	0.222759	0.211361	0.242555	0.305743
DGRP639	29.8867	30.3494	27.7674	27.4377	26.9538		DGRP639	0.525446	0.969136	0.619098	0.480308	1.01061		DGRP639	0.280345	0.128596	0.105655	0.12123	0.217204
DGRP703	25.4393	26.3512	30.3989	29.536	30.5451		DGRP703	1.23184	1.37416	2.02972	1.76507	1.5105		DGRP703	0.256475	0.182075	0.379856	0.437723	0.504477
DGRP705	21.7229	35.9487	18.2983	28.3579	25.3624		DGRP705	1.43927	0.383684	0.3703	0.466557	0.974159		DGRP705	0.186176	0.268712	0.222116	0.194117	0.401606
DGRP707	31.1662	34.5846	33.065	32.6699	36.0139		DGRP707	1.97684	2.602	2.29915	2.57212	2.72768		DGRP707	0.673177	0.143424	0.565827	0.429617	0.5925
DGRP712	30.552	30.769	28.1687	25.3858	29.5632		DGRP712	1.31724	1.31011	0.894019	0.683235	0.666766		DGRP712	0.220001	0.180686	0.282949	0.228157	0.410934
DGRP714	32.5643	31.7223	28.5666	30.4565	32.9166		DGRP714	0.57958	0.6528	0.676376	1.0911	2.10446		DGRP714	0.104381	0.097168	0.132386	0.334571	0.411797
DGRP716	25.6262	28.6445	25.7473	26.0392	30.6985		DGRP716	1.85293	2.61927	1.40659	2.13563	2.97702		DGRP716	0.687485	0.505194	0.405418	0.446886	0.62623
DGRP721	30.567	27.2212	27.0564	23.859	33.1947		DGRP721	1.75958	1.19245	1.23147	0.487677	1.6085		DGRP721	0.330139	0.322289	0.372878	0.368517	0.221328
DGRP730	22.1024	28.1651	26.2596	28.0901	21.8224		DGRP730	0.257114	0.195783	0.283956	0.489055	0.396428		DGRP730	0.09995	0.085308	0.096631	0.149729	0.095655
DGRP737	30.0506	22.8539	22.6678	25.6434	28.1418		DGRP737	0.808426	0.985405	0.428071	0.707333	1.16886		DGRP737	0.212193	0.526787	0.199149	0.492871	0.087182
DGRP738	29.2334	30.3835	32.2949	29.8701	27.0439		DGRP738	1.30568	1.63603	2.42897	1.35641	0.812253		DGRP738	0.416168	0.313424	0.239664	0.384588	0.241611
DGRP748	23.8361	26.4115	28.7783	30.1725	35.9656		DGRP748	0.356136	0.287906	0.418269	1.24121	1.66246		DGRP748	0.296708	0.186739	0.192549	0.256248	0.095029
DGRP761	30.7371	25.5388	29.288	25.7512	28.1432		DGRP761	0.808403	0.376817	0.763112	0.41552	0.532526		DGRP761	0.120689	0.138523	0.128569	0.124422	0.278705
DGRP765	27.8724	29.949	32.8875	32.7671	28.065		DGRP765	1.22523	1.39182	1.74026	3.16303	1.68128		DGRP765	0.394403	0.269071	0.200927	0.41259	0.397252
DGRP774	30.0003	29.534	27.6141	31.8754	28.4794		DGRP774	1.03117	1.19939	0.975309	1.69735	1.14061		DGRP774	0.190938	0.266522	0.347728	0.26798	0.290468
DGRP776	33.7883	33.1846	30.5567	28.5713	25.4426		DGRP776	0.886256	0.797617	1.97334	0.527132	0.83272		DGRP776	0.276952	0.376331	0.282631	0.291804	0.263192
DGRP783	33.8239	29.1826	32.3315	32.8066	34.1379		DGRP783	0.889675	0.890532	1.63278	0.963366	0.693629		DGRP783	0.28337	0.281475	0.20379	0.237896	0.378318
DGRP786	32.322	29.3439	32.0413	30.1914	27.7791		DGRP786	0.505214	0.752012	1.02508	0.86433	0.722785		DGRP786	0.284976	0.457292	0.125755	0.073375	0.147996
DGRP790	25.853	25.1415	23.2064	27.0641	26.3625		DGRP790	1.21633	1.09681	1.00232	1.82565	1.14317		DGRP790	0.198095	0.256371	0.209421	0.24381	0.425637
DGRP796	27.366	29.2881	24.9544	31.8721	21.8218		DGRP796	1.19239	1.25735	1.24575	1.51796	0.873838		DGRP796	0.622405	0.130266	0.311202	0.281409	0.128961
DGRP799	29.5497	29.8188	29.4417	27.5749	31.2137		DGRP799	0.385345	0.48061	0.497881	0.699883	1.33993		DGRP799	0.117805	0.166697	0.153842	0.22149	0.331076
DGRP801	27.3107	26.8626	26.381	30.6843	30.9254		DGRP801	0.992207	1.17826	1.20591	0.460582	1.0255		DGRP801	0.190935	0.505041	0.252947	0.316237	0.289386
DGRP802	34.0853	33.5719	31.2213	31.5954	23.925		DGRP802	1.61214	1.24253	1.00083	1.58245	0.878895		DGRP802	0.294497	0.278814	0.370518	0.499469	0.273368
DGRP804	32.9149	30.0711	31.5542	29.8531	34.8926		DGRP804	1.58641	1.32548	1.30034	0.82126	1.52652		DGRP804	0.113622	0.345636	0.334144	0.381197	0.408735
DGRP805	24.4653	29.5738	26.1228	31.6549	24.2093		DGRP805	1.29758	1.21081	0.830166	0.548748	0.553336		DGRP805	0.18917	0.328884	0.112307	0.318786	0.146308
DGRP808	28.1806	29.4761	30.3274	30.3351	28.3168		DGRP808	1.23027	1.42712	1.22731	1.51889	1.03236		DGRP808	0.211006	0.354933	0.340605	0.224031	0.351243
DGRP810	33.9904	30.7911	31.4245	30.1086	29.144		DGRP810	2.31373	1.16652	1.38301	1.62735	1.091		DGRP810	0.427578	0.291579	0.32106	0.158809	0.387338
DGRP812	23.4949	25.1874	24.5373	27.2106	20.9838		DGRP812	0.236133	0.271774	0.212598	0.276415	0.252813		DGRP812	0.106792	0.107788	0.104999	0.085473	0.108585
DGRP818	26.169	24.2374	23.6737	24.7824	22.8913		DGRP818	1.80375	1.34432	0.977702	1.20858	0.875818		DGRP818	0.181699	0.234031	0.184211	0.172069	0.373445
DGRP819	30.6928	29.6775	32.4692	25.3087	31.5158		DGRP819	0.70527	0.935709	0.692424	0.519849	0.591823		DGRP819	0.253885	0.268844	0.287127	0.239965	0.24412
DGRP820	32.9819	31.1065	28.6235	30.1585	29.9429		DGRP820	2.03872	2.35866	2.10259	2.29075	2.41219		DGRP820	0.589739	0.594607	0.554039	0.583016	0.643752
DGRP822	31.3682	34.3834	28.5376	29.0126	31.565		DGRP822	0.798799	2.12313	0.897131	1.10567	1.07171		DGRP822	0.274116	0.310763	0.308009	0.382788	0.254627
DGRP837	22.147	20.5158	25.3017	25.0808	23.8125		DGRP837	0.476799	0.536952	0.456725	0.519789	0.211986		DGRP837	0.101283	0.122231	0.139925	0.074437	0.121214
DGRP843	32.5873	29.4635	33.4263	28.4908	25.6186		DGRP843	2.15669	1.461	1.81978	1.80783	0.894754		DGRP843	0.190796	0.343935	0.490798	0.406279	0.356069
DGRP850	32.2548	31.6764	31.2908	30.7942	30.8276		DGRP850	0.453607	2.81291	2.8518	1.06599	1.45922		DGRP850	0.111668	0.57791	0.609603	0.250137	0.305227
DGRP852	29.8548	28.2683	31.276	29.1943	28.2476		DGRP852	0.888555	1.27638	0.91386	0.922758	1.02459		DGRP852	0.201817	0.312086	0.135162	0.291307	0.242962
DGRP853	31.7144	32.8105	29.4346	23.9179	31.616		DGRP853	0.812439	1.29561	1.96082	1.95395	0.404583		DGRP853	0.242588	0.476989	0.225352	0.413218	0.21458
DGRP855	30.313	28.6727	27.4224	32.3948	31.1603		DGRP855	0.843786	1.31752	1.14037	1.75533	0.398551		DGRP855	0.225281	0.324872	0.347212	0.181644	0.230083
DGRP857	25.6439	25.1581	22.6634	26.3858	25.9923		DGRP857	0.747081	1.18445	0.468012	1.20045	0.993474		DGRP857	0.373346	0.239453	0.114585	0.079118	0.069255
DGRP859	30.4018	32.727	31.7869	31.3639	31.131		DGRP859	1.02053	1.90918	2.27929	1.6364	1.63797		DGRP859	0.296094	0.571899	0.527084	0.415825	0.567886
DGRP879	31.7061	29.488	25.6854	26.9489	31.0837		DGRP879	0.988803	1.23827	0.852229	2.15407	1.07852		DGRP879	0.47072	0.238716	0.328288	0.352621	0.403594
DGRP882	32.1229	29.7359	26.0253	29.5977	24.4856		DGRP882	0.876727	0.61947	0.587424	1.24331	1.19752		DGRP882	0.196704	0.236747	0.141181	0.208676	0.319722
DGRP890	29.7487	29.3716	26.5272	26.8355	21.0005		DGRP890	1.09436	1.71131	0.959371	0.974531	0.298108		DGRP890	0.12548	0.140521	0.257553	0.291344	0.282072
DGRP892	31.5626	25.7954	24.0332	22.4177	23.6103		DGRP892	1.3649	0.663725	0.703742	0.530443	1.23285		DGRP892	0.327362	0.158066	0.094215	0.287014	0.10607
DGRP897	21.9567	30.1604	29.821	25.9945	35.1568		DGRP897	0.461658	0.467827	1.48773	0.640121	0.25339		DGRP897	0.262422	0.135504	0.133829	0.119587	0.227446
DGRP900	28.5393	30.6656	30.0098	30.5475	28.8326		DGRP900	0.966803	1.97492	0.880959	1.75427	0.673377		DGRP900	0.278347	0.323451	0.389853	0.409899	0.356026
DGRP907	22.0217	23.7721	22.5215	19.202	23.3793		DGRP907	0.484239	0.407437	0.334904	0.515815	0.376162		DGRP907	0.144754	0.156799	0.104671	0.133331	0.075596
DGRP908	30.2477	27.1094	27.4947	27.5223	23.6393		DGRP908	0.275134	0.269768	0.266186	0.651587	0.094801		DGRP908	0.088532	0.107631	0.120363	0.096887	0.103254
DGRP911	28.3648	27.8237	26.05	28.6671	30.2416		DGRP911	2.04235	1.58301	1.16559	1.08213	2.4713		DGRP911	0.334414	0.279718	0.401588	0.394725	0.362282

## Sheet: Figure 1D_Raw Data
Figure 1D
	walking speed	SD			centroid velocity	SD			walking speed	centroid velocity
DGRP21	1.24405	28.0272		DGRP21	0.339394	28.0272		DGRP21	1.24405	0.339394
DGRP26	0.66505	26.5909		DGRP26	0.22	26.5909		DGRP26	0.66505	0.22
DGRP31	0.882092	28.0194		DGRP31	0.279015	28.0194		DGRP31	0.882092	0.279015
DGRP32	1.2335	30.2702		DGRP32	0.342576	30.2702		DGRP32	1.2335	0.342576
DGRP38	1.06491	30.1546		DGRP38	0.29447	30.1546		DGRP38	1.06491	0.29447
DGRP40	0.881149	25.7998		DGRP40	0.228333	25.7998		DGRP40	0.881149	0.228333
DGRP41	0.804407	24.6704		DGRP41	0.276288	24.6704		DGRP41	0.804407	0.276288
DGRP42	1.27593	28.7416		DGRP42	0.324848	28.7416		DGRP42	1.27593	0.324848
DGRP45	1.21391	28.9359		DGRP45	0.300682	28.9359		DGRP45	1.21391	0.300682
DGRP48	0.870943	26.3033		DGRP48	0.28447	26.3033		DGRP48	0.870943	0.28447
DGRP57	0.62946	25.1731		DGRP57	0.201439	25.1731		DGRP57	0.62946	0.201439
DGRP59	1.05392	29.6635		DGRP59	0.326515	29.6635		DGRP59	1.05392	0.326515
DGRP69	1.40436	28.5068		DGRP69	0.345076	28.5068		DGRP69	1.40436	0.345076
DGRP73	0.316097	17.6224		DGRP73	0.118258	17.6224		DGRP73	0.316097	0.118258
DGRP75	1.91361	29.0855		DGRP75	0.473636	29.0855		DGRP75	1.91361	0.473636
DGRP83	0.855627	27.5499		DGRP83	0.249697	27.5499		DGRP83	0.855627	0.249697
DGRP88	1.09601	28.9229		DGRP88	0.320076	28.9229		DGRP88	1.09601	0.320076
DGRP91	0.643036	23.6529		DGRP91	0.246136	23.6529		DGRP91	0.643036	0.246136
DGRP93	0.823435	23.2054		DGRP93	0.250455	23.2054		DGRP93	0.823435	0.250455
DGRP100	1.14348	27.892		DGRP100	0.3325	27.892		DGRP100	1.14348	0.3325
DGRP101	1.37925	28.0739		DGRP101	0.390682	28.0739		DGRP101	1.37925	0.390682
DGRP105	1.29376	27.4592		DGRP105	0.361591	27.4592		DGRP105	1.29376	0.361591
DGRP109	2.06716	28.0592		DGRP109	0.500606	28.0592		DGRP109	2.06716	0.500606
DGRP129	0.577211	27.2123		DGRP129	0.179545	27.2123		DGRP129	0.577211	0.179545
DGRP136	0.953823	30.7128		DGRP136	0.298106	30.7128		DGRP136	0.953823	0.298106
DGRP142	1.30684	30.6394		DGRP142	0.349091	30.6394		DGRP142	1.30684	0.349091
DGRP149	0.947214	26.5549		DGRP149	0.318561	26.5549		DGRP149	0.947214	0.318561
DGRP153	1.01599	27.7916		DGRP153	0.273258	27.7916		DGRP153	1.01599	0.273258
DGRP161	1.45965	30.5543		DGRP161	0.343106	30.5543		DGRP161	1.45965	0.343106
DGRP176	0.799377	27.4342		DGRP176	0.269848	27.4342		DGRP176	0.799377	0.269848
DGRP177	0.176312	28.1087		DGRP177	0.0775758	28.1087		DGRP177	0.176312	0.0775758
DGRP181	2.31094	30.7299		DGRP181	0.577121	30.7299		DGRP181	2.31094	0.577121
DGRP189	0.608779	29.172		DGRP189	0.188258	29.172		DGRP189	0.608779	0.188258
DGRP195	0.335393	24.5848		DGRP195	0.117727	24.5848		DGRP195	0.335393	0.117727
DGRP208	0.574104	23.1403		DGRP208	0.214621	23.1403		DGRP208	0.574104	0.214621
DGRP217	0.919987	30.8863		DGRP217	0.286818	30.8863		DGRP217	0.919987	0.286818
DGRP227	1.17083	29.3188		DGRP227	0.340303	29.3188		DGRP227	1.17083	0.340303
DGRP228	0.383852	25.9252		DGRP228	0.149848	25.9252		DGRP228	0.383852	0.149848
DGRP229	1.07559	29.7133		DGRP229	0.308939	29.7133		DGRP229	1.07559	0.308939
DGRP235	0.722968	28.6923		DGRP235	0.240455	28.6923		DGRP235	0.722968	0.240455
DGRP239	1.76281	30.3661		DGRP239	0.468485	30.3661		DGRP239	1.76281	0.468485
DGRP256	1.0069	27.3534		DGRP256	0.315455	27.3534		DGRP256	1.0069	0.315455
DGRP280	0.854292	27.9292		DGRP280	0.223333	27.9292		DGRP280	0.854292	0.223333
DGRP287	0.802669	31.4736		DGRP287	0.263939	31.4736		DGRP287	0.802669	0.263939
DGRP301	1.03508	27.9294		DGRP301	0.318636	27.9294		DGRP301	1.03508	0.318636
DGRP303	0.435267	26.5496		DGRP303	0.151212	26.5496		DGRP303	0.435267	0.151212
DGRP304	0.535076	28.3697		DGRP304	0.203258	28.3697		DGRP304	0.535076	0.203258
DGRP306	1.34868	29.1497		DGRP306	0.34303	29.1497		DGRP306	1.34868	0.34303
DGRP307	1.03667	25.2135		DGRP307	0.316439	25.2135		DGRP307	1.03667	0.316439
DGRP313	0.813853	24.7771		DGRP313	0.269621	24.7771		DGRP313	0.813853	0.269621
DGRP315	1.07774	27.8217		DGRP315	0.325606	27.8217		DGRP315	1.07774	0.325606
DGRP317	2.3198	32.0284		DGRP317	0.540076	32.0284		DGRP317	2.3198	0.540076
DGRP318	1.13517	28.2173		DGRP318	0.334394	28.2173		DGRP318	1.13517	0.334394
DGRP319	0.815543	27.9739		DGRP319	0.254167	27.9739		DGRP319	0.815543	0.254167
DGRP320	0.430164	26.7442		DGRP320	0.154697	26.7442		DGRP320	0.430164	0.154697
DGRP321	0.879988	27.6547		DGRP321	0.292727	27.6547		DGRP321	0.879988	0.292727
DGRP324	1.6078	27.6033		DGRP324	0.498409	27.6033		DGRP324	1.6078	0.498409
DGRP332	0.286849	27.6135		DGRP332	0.105758	27.6135		DGRP332	0.286849	0.105758
DGRP335	0.562506	26.1442		DGRP335	0.187273	26.1442		DGRP335	0.562506	0.187273
DGRP336	0.639894	29.0668		DGRP336	0.226515	29.0668		DGRP336	0.639894	0.226515
DGRP338	0.660749	31.9111		DGRP338	0.294242	31.9111		DGRP338	0.660749	0.294242
DGRP340	1.12317	25.8868		DGRP340	0.321515	25.8868		DGRP340	1.12317	0.321515
DGRP348	1.25689	30.4774		DGRP348	0.329545	30.4774		DGRP348	1.25689	0.329545
DGRP350	0.479929	27.1231		DGRP350	0.164015	27.1231		DGRP350	0.479929	0.164015
DGRP352	0.9886	26.5114		DGRP352	0.315606	26.5114		DGRP352	0.9886	0.315606
DGRP354	0.860635	30.8298		DGRP354	0.253939	30.8298		DGRP354	0.860635	0.253939
DGRP356	0.729188	27.4698		DGRP356	0.2275	27.4698		DGRP356	0.729188	0.2275
DGRP357	1.78898	29.3914		DGRP357	0.458636	29.3914		DGRP357	1.78898	0.458636
DGRP359	1.57231	32.3793		DGRP359	0.367197	32.3793		DGRP359	1.57231	0.367197
DGRP360	2.60943	33.6816		DGRP360	0.56197	33.6816		DGRP360	2.60943	0.56197
DGRP361	0.719475	27.893		DGRP361	0.186894	27.893		DGRP361	0.719475	0.186894
DGRP362	0.897339	29.1628		DGRP362	0.270227	29.1628		DGRP362	0.897339	0.270227
DGRP365	1.17312	27.4794		DGRP365	0.331364	27.4794		DGRP365	1.17312	0.331364
DGRP370	0.247212	22.3978		DGRP370	0.108409	22.3978		DGRP370	0.247212	0.108409
DGRP371	1.09815	30.3381		DGRP371	0.276136	30.3381		DGRP371	1.09815	0.276136
DGRP373	0.372791	27.3655		DGRP373	0.165227	27.3655		DGRP373	0.372791	0.165227
DGRP374	0.871808	32.2515		DGRP374	0.266061	32.2515		DGRP374	0.871808	0.266061
DGRP375	0.966153	26.9351		DGRP375	0.277121	26.9351		DGRP375	0.966153	0.277121
DGRP377	0.528046	30.2118		DGRP377	0.189242	30.2118		DGRP377	0.528046	0.189242
DGRP379	0.743433	29.4888		DGRP379	0.255227	29.4888		DGRP379	0.743433	0.255227
DGRP380	0.538385	24.5556		DGRP380	0.185227	24.5556		DGRP380	0.538385	0.185227
DGRP381	0.613976	27.866		DGRP381	0.197879	27.866		DGRP381	0.613976	0.197879
DGRP382	0.66741	31.0726		DGRP382	0.206742	31.0726		DGRP382	0.66741	0.206742
DGRP383	1.33147	30.1072		DGRP383	0.298485	30.1072		DGRP383	1.33147	0.298485
DGRP385	1.41895	28.5657		DGRP385	0.4	28.5657		DGRP385	1.41895	0.4
DGRP386	0.946684	25.7149		DGRP386	0.247045	25.7149		DGRP386	0.946684	0.247045
DGRP390	0.38721	24.124		DGRP390	0.141742	24.124		DGRP390	0.38721	0.141742
DGRP391	2.36317	30.806		DGRP391	0.540076	30.806		DGRP391	2.36317	0.540076
DGRP392	1.52685	32.1294		DGRP392	0.370606	32.1294		DGRP392	1.52685	0.370606
DGRP395	0.900235	27.3122		DGRP395	0.302652	27.3122		DGRP395	0.900235	0.302652
DGRP397	0.742131	26.9249		DGRP397	0.258864	26.9249		DGRP397	0.742131	0.258864
DGRP399	1.41075	26.7164		DGRP399	0.409242	26.7164		DGRP399	1.41075	0.409242
DGRP405	1.4972	28.5253		DGRP405	0.386894	28.5253		DGRP405	1.4972	0.386894
DGRP406	0.764531	27.1252		DGRP406	0.244091	27.1252		DGRP406	0.764531	0.244091
DGRP409	0.972255	26.0469		DGRP409	0.274091	26.0469		DGRP409	0.972255	0.274091
DGRP426	0.539984	24.1311		DGRP426	0.196136	24.1311		DGRP426	0.539984	0.196136
DGRP427	1.47877	30.2543		DGRP427	0.370758	30.2543		DGRP427	1.47877	0.370758
DGRP437	0.802258	27.7786		DGRP437	0.244773	27.7786		DGRP437	0.802258	0.244773
DGRP440	0.582467	24.0173		DGRP440	0.208636	24.0173		DGRP440	0.582467	0.208636
DGRP441	0.920446	29.531		DGRP441	0.285	29.531		DGRP441	0.920446	0.285
DGRP443	0.67985	29.771		DGRP443	0.256364	29.771		DGRP443	0.67985	0.256364
DGRP461	1.11577	28.5279		DGRP461	0.325227	28.5279		DGRP461	1.11577	0.325227
DGRP486	0.54746	20.7415		DGRP486	0.203485	20.7415		DGRP486	0.54746	0.203485
DGRP491	0.999805	27.5664		DGRP491	0.30303	27.5664		DGRP491	0.999805	0.30303
DGRP492	0.21821	25.2804		DGRP492	0.0768939	25.2804		DGRP492	0.21821	0.0768939
DGRP502	0.692873	26.9116		DGRP502	0.223636	26.9116		DGRP502	0.692873	0.223636
DGRP505	1.2562	29.8844		DGRP505	0.306667	29.8844		DGRP505	1.2562	0.306667
DGRP508	0.386226	26.1752		DGRP508	0.145227	26.1752		DGRP508	0.386226	0.145227
DGRP509	1.13598	29.2215		DGRP509	0.356212	29.2215		DGRP509	1.13598	0.356212
DGRP513	0.747164	27.5215		DGRP513	0.23197	27.5215		DGRP513	0.747164	0.23197
DGRP517	0.844812	25.287		DGRP517	0.241818	25.287		DGRP517	0.844812	0.241818
DGRP528	2.19219	31.3122		DGRP528	0.515379	31.3122		DGRP528	2.19219	0.515379
DGRP530	0.609244	24.5124		DGRP530	0.236136	24.5124		DGRP530	0.609244	0.236136
DGRP535	1.48394	26.7292		DGRP535	0.383939	26.7292		DGRP535	1.48394	0.383939
DGRP551	0.584646	21.8928		DGRP551	0.195909	21.8928		DGRP551	0.584646	0.195909
DGRP555	1.05539	31.3699		DGRP555	0.285909	31.3699		DGRP555	1.05539	0.285909
DGRP559	1.29669	25.0794		DGRP559	0.352652	25.0794		DGRP559	1.29669	0.352652
DGRP563	0.330908	20.6861		DGRP563	0.148788	20.6861		DGRP563	0.330908	0.148788
DGRP566	0.421022	21.5522		DGRP566	0.15	21.5522		DGRP566	0.421022	0.15
DGRP584	1.0335	29.9098		DGRP584	0.272727	29.9098		DGRP584	1.0335	0.272727
DGRP589	1.63129	27.0144		DGRP589	0.414697	27.0144		DGRP589	1.63129	0.414697
DGRP595	0.586047	29.3087		DGRP595	0.207879	29.3087		DGRP595	0.586047	0.207879
DGRP596	0.871803	27.1712		DGRP596	0.284091	27.1712		DGRP596	0.871803	0.284091
DGRP627	1.34771	30.1232		DGRP627	0.343788	30.1232		DGRP627	1.34771	0.343788
DGRP630	0.872394	25.8929		DGRP630	0.273182	25.8929		DGRP630	0.872394	0.273182
DGRP634	1.12543	30.5023		DGRP634	0.292652	30.5023		DGRP634	1.12543	0.292652
DGRP639	0.720919	28.479		DGRP639	0.239697	28.479		DGRP639	0.720919	0.239697
DGRP703	1.58226	28.4541		DGRP703	0.439394	28.4541		DGRP703	1.58226	0.439394
DGRP705	0.726795	25.9381		DGRP705	0.243712	25.9381		DGRP705	0.726795	0.243712
DGRP707	2.43556	33.4999		DGRP707	0.536894	33.4999		DGRP707	2.43556	0.536894
DGRP712	0.974274	28.8877		DGRP712	0.314773	28.8877		DGRP712	0.974274	0.314773
DGRP714	1.02086	31.2453		DGRP714	0.306212	31.2453		DGRP714	1.02086	0.306212
DGRP716	2.19829	27.3512		DGRP716	0.528106	27.3512		DGRP716	2.19829	0.528106
DGRP721	1.25594	28.3797		DGRP721	0.343788	28.3797		DGRP721	1.25594	0.343788
DGRP730	0.324467	25.2879		DGRP730	0.131742	25.2879		DGRP730	0.324467	0.131742
DGRP737	0.819618	25.8715		DGRP737	0.263333	25.8715		DGRP737	0.819618	0.263333
DGRP738	1.50787	29.7652		DGRP738	0.398182	29.7652		DGRP738	1.50787	0.398182
DGRP748	0.793196	29.0328		DGRP748	0.250379	29.0328		DGRP748	0.793196	0.250379
DGRP761	0.579276	27.8917		DGRP761	0.187803	27.8917		DGRP761	0.579276	0.187803
DGRP765	1.84032	30.3082		DGRP765	0.430985	30.3082		DGRP765	1.84032	0.430985
DGRP774	1.20877	29.5007		DGRP774	0.357576	29.5007		DGRP774	1.20877	0.357576
DGRP776	1.00341	30.3087		DGRP776	0.330758	30.3087		DGRP776	1.00341	0.330758
DGRP783	1.014	32.4565		DGRP783	0.27303	32.4565		DGRP783	1.014	0.27303
DGRP786	0.773884	30.3355		DGRP786	0.254697	30.3355		DGRP786	0.773884	0.254697
DGRP790	1.25686	25.5255		DGRP790	0.337121	25.5255		DGRP790	1.25686	0.337121
DGRP796	1.21746	27.0604		DGRP796	0.334697	27.0604		DGRP796	1.21746	0.334697
DGRP799	0.680731	29.5198		DGRP799	0.241515	29.5198		DGRP799	0.680731	0.241515
DGRP801	0.972491	28.4328		DGRP801	0.317955	28.4328		DGRP801	0.972491	0.317955
DGRP802	1.26337	30.8798		DGRP802	0.331061	30.8798		DGRP802	1.26337	0.331061
DGRP804	1.312	31.8572		DGRP804	0.313864	31.8572		DGRP804	1.312	0.313864
DGRP805	0.888129	27.2052		DGRP805	0.30303	27.2052		DGRP805	0.888129	0.30303
DGRP808	1.28719	29.3272		DGRP808	0.337121	29.3272		DGRP808	1.28719	0.337121
DGRP810	1.51632	31.0917		DGRP810	0.342879	31.0917		DGRP810	1.51632	0.342879
DGRP812	0.249947	24.2828		DGRP812	0.0937879	24.2828		DGRP812	0.249947	0.0937879
DGRP818	1.24203	24.3508		DGRP818	0.318636	24.3508		DGRP818	1.24203	0.318636
DGRP819	0.689015	29.9328		DGRP819	0.225303	29.9328		DGRP819	0.689015	0.225303
DGRP820	2.24058	30.5627		DGRP820	0.590076	30.5627		DGRP820	2.24058	0.590076
DGRP822	1.19929	30.9734		DGRP822	0.349924	30.9734		DGRP822	1.19929	0.349924
DGRP837	0.44045	23.3715		DGRP837	0.160227	23.3715		DGRP837	0.44045	0.160227
DGRP843	1.62801	29.9173		DGRP843	0.411364	29.9173		DGRP843	1.62801	0.411364
DGRP850	1.7287	31.3687		DGRP850	0.388939	31.3687		DGRP850	1.7287	0.388939
DGRP852	1.00523	29.3682		DGRP852	0.337576	29.3682		DGRP852	1.00523	0.337576
DGRP853	1.28548	29.8987		DGRP853	0.338636	29.8987		DGRP853	1.28548	0.338636
DGRP855	1.09111	29.9926		DGRP855	0.288409	29.9926		DGRP855	1.09111	0.288409
DGRP857	0.918695	25.1687		DGRP857	0.279091	25.1687		DGRP857	0.918695	0.279091
DGRP859	1.69667	31.4821		DGRP859	0.47553	31.4821		DGRP859	1.69667	0.47553
DGRP879	1.26238	28.9824		DGRP879	0.409621	28.9824		DGRP879	1.26238	0.409621
DGRP882	0.904891	28.3935		DGRP882	0.313788	28.3935		DGRP882	0.904891	0.313788
DGRP890	1.00754	26.6967		DGRP890	0.29553	26.6967		DGRP890	1.00754	0.29553
DGRP892	0.899132	25.4838		DGRP892	0.260758	25.4838		DGRP892	0.899132	0.260758
DGRP897	0.662145	28.6179		DGRP897	0.21697	28.6179		DGRP897	0.662145	0.21697
DGRP900	1.25006	29.719		DGRP900	0.332955	29.719		DGRP900	1.25006	0.332955
DGRP907	0.423711	22.1793		DGRP907	0.162197	22.1793		DGRP907	0.423711	0.162197
DGRP908	0.311495	27.2027		DGRP908	0.127576	27.2027		DGRP908	0.311495	0.127576
DGRP911	1.66888	28.2294		DGRP911	0.447197	28.2294		DGRP911	1.66888	0.447197

## Sheet: Figure 1D_Statistics
Figure 1D
normality test (Shapiro-Wilk test)		Passed normality test?
SD	**p = 0.0015	No
centroid velocity	**p = 0.0015	No
walking speed	****p < 0.0001	No
Spearman r
SD vs centroid velocity	****p < 0.0001	r = 0.5182
SD vs walking speed	****p < 0.0001	r = 0.5474
walking speed vs centroid velocity	****p < 0.0001	r = 0.9666
