# Supplementary material for: Drosulfakinin signaling encodes early-life memory for adaptive social plasticity
Source: eLife. 2024 Dec 18;13:e103973. doi: 10.7554/eLife.103973 (PMC11706606; doi:10.7554/eLife.103973)
Supplement: Figure 2—source data 1. [file elife-103973-fig2-data1.xlsx]

## Sheet: Figure 2A_Raw data
Figure 2A
SD					walking speed
DGRP73					DGRP73
Q1	Q2	Q3	Q4		Q1	Q2	Q3	Q4
22.0501	14.6612	16.7995	17.0459		0.083	0.046867	0.037667	0.0416
28.9615	25.4235	19.4458	17.4582		0.087933	0.048467	0.0632	0.061933
16.2045	12.5108	8.96657	8.16801		0.3764	0.107067	0.066667	0.035467
34.3018	21.0267	16.2349	13.036		0.089	0.0408	0.028667	0.023467
13.1132	13.3608	14.1871	12.2254		0.053667	0.042067	0.032933	0.0328
14.949	12.1462	12.2303	10.2735		0.139333	0.082833	0.055333	0.033333
31.0764	27.1075	18.9095	16.976		0.294267	0.134533	0.1036	0.093333
34.4355	22.2694	17.2662	14.5574		0.050867	0.042867	0.033533	0.0308
DGRP563					DGRP563
Q1	Q2	Q3	Q4		Q1	Q2	Q3	Q4
30.7308	26.5165	17.4234	19.5282		0.1182	0.082933	0.0504	0.062
17.4345	18.8618	15.2132	16.3115		0.1006	0.081667	0.068467	0.05
21.9421	18.5112	15.7247	15.099		0.118667	0.0822	0.052933	0.043133
17.5818	17.8163	17.2087	15.3021		0.0788	0.057467	0.049667	0.059867
33.4449	27.4454	20.7059	22.4758		0.112867	0.074933	0.056933	0.064533
28.6204	25.072	22.2192	20.4384		0.104867	0.043333	0.0284	0.031067
17.7493	15.5827	14.2944	13.8874		0.019533	0.026	0.0306	0.022533
24.826	23.4266	19.3051	17.6301		0.060067	0.030133	0.026133	0.032133
DGRP370					DGRP370
Q1	Q2	Q3	Q4		Q1	Q2	Q3	Q4
29.6739	26.4217	25.6864	21.5965		0.0944	0.045333	0.0382	0.0444
21.9282	19.0441	21.0804	23.7732		0.059067	0.042267	0.0356	0.034467
25.4628	22.4103	25.3846	26.8722		0.101133	0.038667	0.056	0.055333
24.5434	23.4189	23.3864	20.9536		0.062	0.046867	0.053733	0.073667
21.5232	20.0487	19.0127	15.3907		0.066067	0.043267	0.052267	0.0388
22.255	19.8126	20.6561	16.7317		0.075533	0.040933	0.038467	0.036667
23.0173	20.2215	18.3645	18.7266		0.047867	0.034533	0.037867	0.0332
22.9088	21.8344	17.7162	16.7036		0.107933	0.0474	0.0408	0.040733

## Sheet: Figure 2B_Raw data
Figure 2B
SD					walking speed
DGRP360					DGRP360
Q1	Q2	Q3	Q4		Q1	Q2	Q3	Q4
41.7978	41.2492	38.7992	39.261		1.35364	1.22639	1.20932	1.2806
36.9571	36.2237	37.3998	35.647		2.42165	2.21407	1.86719	1.8579
36.1197	33.986	33.7206	33.6136		2.35814	2.07577	1.82377	1.61393
33.7043	33.9931	33.3332	33.3752		1.91689	1.5173	1.37347	1.13326
35.6313	35.5228	35.6064	33.37		3.262	2.99845	2.77506	2.68269
35.6313	35.5228	35.6064	33.37		2.886	2.39078	2.08355	1.945
33.7925	34.2363	34.3912	33.8887		1.23617	1.35791	1.78034	1.44476
38.4765	37.4802	35.1764	37.7013		1.58481	1.568	1.65936	1.78336
DGRP707					DGRP707
Q1	Q2	Q3	Q4		Q1	Q2	Q3	Q4
33.3142	34.2011	32.5395	31.556		1.46705	1.67513	1.3845	1.40756
37.3317	36.9903	36.9565	35.7592		2.69011	2.51741	2.45111	2.5009
36.5018	35.8492	36.3859	32.7023		3.09317	2.80411	2.53156	2.2826
36.412	34.3787	33.6272	34.5844		2.18118	1.77052	1.42145	1.61695
39.2554	38.1965	39.7621	37.8909		1.90784	1.53597	1.57371	1.52261
33.3223	31.8466	30.0677	32.5834		1.83892	1.34099	1.25713	1.50348
31.6649	29.5442	32.5002	33.1876		1.59704	1.37585	1.33313	1.87011
35.1055	37.0624	35.6737	35.2159		1.85072	1.76921	1.84207	1.82215
DGRP317					DGRP317
Q1	Q2	Q3	Q4		Q1	Q2	Q3	Q4
31.9441	34.0162	34.1124	32.2623		2.74257	1.96199	1.56351	1.31381
33.3684	33.9649	34.2619	33.7594		1.74168	1.53924	1.43643	1.04879
37.9166	35.5713	36.7789	37.2201		1.42961	1.30551	1.36937	1.37491
32.809	30.6906	32.9841	33.9337		2.00095	1.50667	1.15821	1.12862
33.3223	31.8466	30.0677	32.5834		1.90239	1.75892	1.57138	1.41344
34.6338	35.013	31.0234	30.642		1.97838	1.26081	1.02708	0.666698
35.4299	36.6099	34.7999	35.4431		2.82347	2.47628	2.11419	1.90175
34.7407	33.8979	33.036	34.0177		2.00499	1.39087	1.02772	0.874668

## Sheet: Figure 2D_Raw data
Figure 2D
cumulative travel distance
DGRP73	DGRP563	DGRP370	DGRP360	DGRP707	DGRP317
10.2764	6.598	6.76851	26.1165	29.7012	23.4795
20.5216	13.557	12.9383	50.5316	57.088	47.1862
29.2752	19.3165	18.1502	76.0288	85.8592	72.0535
37.4654	24.625	23.4658	100.292	113.321	94.2827
45.2725	29.2183	27.7925	127.254	139.4	118.491
53.9775	33.6809	31.6624	153.068	168.036	141.789
62.6898	37.7583	35.2592	177.38	197.424	167.242
71.26	42.2424	38.485	203.531	227.095	190.715
79.5522	46.0051	42.2291	228.653	255.428	213.201
85.6047	49.3463	45.6518	252.926	282.544	236.655
91.4522	52.8396	49.6469	278.189	310.307	259.454
98.1772	56.5731	54.5705	303.477	335.151	281.207
105.579	60.3196	59.587	328.718	360.671	305.766
113.322	63.4587	63.4969	354.067	388.469	328.694
119.816	67.2852	66.7972	380.401	414.506	351.594
125.094	70.5226	70.6218	404.842	441.781	374.764
130.553	73.5983	74.0798	429.859	468.439	396.18
136.428	76.5746	77.9757	457.155	494.611	421.126
142.693	79.5219	82.0558	483.949	521.332	445.864
149.633	82.9911	85.8916	510.175	548.807	468.618
156.201	86.375	89.441	537.652	575.79	491.369
162.305	90.2144	91.8636	565.56	600.621	512.076
167.52	93.7141	94.8897	592.027	625.329	533.837
172.234	96.3393	98.0253	617.132	651.303	556.229
177.85	98.695	101.764	641.737	676.254	579.828
182.512	101.383	106.198	665.253	702.489	602.811
187.003	103.911	109.612	688.23	727.882	625.953
191.127	106.138	112.856	712.713	752.992	648.512
196.758	108.132	116.262	735.874	778.247	671.011
204.099	110.551	120.374	759.106	803.202	694.997
211.302	112.714	123.814	783.725	830.018	717.618
217.72	114.665	126.763	806.929	854.978	741.227
223.669	116.532	130.209	830.791	879.233	762.528
229.98	118.762	132.848	854.86	904.795	783.701
236.287	120.751	135.188	878.595	929.388	809.029
241.94	122.926	137.652	901.918	952.46	831.199
248.24	125.757	140.119	927.076	975.773	854.913
253.714	128.828	143.064	951.732	1000.64	875.724
257.99	131.758	145.946	977.508	1023.46	897.386
262.716	134.415	148.729	1001.73	1047.25	919.926
266.681	137.234	151.521	1024.2	1070.26	942.901
270.946	139.441	154.578	1047.95	1094.22	966.414
275.372	141.698	157.587	1071.37	1117.28	988.661
280.62	143.339	160.586	1095.11	1141.69	1010.6
284.728	144.96	163.81	1119.28	1166.37	1031.96
287.847	146.757	167.731	1144.57	1189.08	1052.79
291.531	148.518	170.912	1169.16	1212.28	1074.51
294.954	150.321	173.978	1193.23	1236.15	1094.14
299.15	152.564	176.797	1215.62	1259.22	1115.63
302.963	154.369	179.599	1235.7	1282.53	1135.65
306.635	156.454	181.719	1257.9	1304.7	1155.71
310.868	158.282	184.552	1278.61	1329.27	1177.19
314.372	160.072	187.81	1299.24	1353.51	1199.49
318.019	161.875	190.794	1320.97	1377.63	1221.01
321.322	163.75	194.642	1343.05	1401.26	1241.01
325.036	165.382	197.45	1366.43	1424.84	1261.76
329.243	167.275	200.834	1389.32	1448.47	1283.13
332.517	169.252	203.675	1412.54	1471.96	1304.81
336.234	170.904	206.674	1434.72	1493.31	1326.23
339.276	172.815	209.16	1455.95	1516.07	1346.08
342.501	174.622	212.074	1479.1	1539.46	1366.57
346.202	176.605	214.435	1503.27	1563.02	1388.18
349.12	178.392	216.905	1526.42	1585.72	1408.3
351.675	180.035	219.032	1548.92	1606.92	1428.26
354.672	181.664	221.802	1570.5	1627.87	1448.58
357.266	183.274	224.4	1591.51	1650.38	1468.24
360.073	185.431	227.175	1614.58	1671.64	1487.28
363.637	187.249	229.863	1637.91	1694.16	1506.02
366.585	189.077	232.068	1661.91	1715.68	1524.88
369.692	190.665	234.994	1684.64	1737.07	1543.71
373.039	192.194	237.505	1705.8	1756.49	1564.17
376.531	194.079	239.877	1727.42	1776.95	1585.3
379.571	195.694	242.407	1750.78	1796.13	1607.41
382.212	197.465	244.68	1773.31	1815.51	1628.03
384.446	199.233	246.873	1795.14	1834.11	1648.14
386.435	201.286	249.248	1816.94	1854.14	1667.61
389.089	203.058	251.687	1838.78	1874.89	1686.97
391.516	204.528	253.817	1862.52	1895.28	1709.38
394.529	206.144	256.024	1885.22	1915.55	1727.82
397.487	207.667	258.382	1907.66	1935.63	1747.63
400.308	209.093	260.859	1931.17	1954.87	1769.56
403.084	210.64	262.696	1952.6	1975.17	1788.88
406.217	212.39	264.724	1976.27	1994.12	1807.82
408.835	213.895	267.298	1998.56	2014.74	1827.14
411.714	215.503	269.441	2020.57	2035.82	1845.88
414	217.257	271.627	2041.4	2055.79	1865.79
416.815	218.654	273.895	2062.74	2076.85	1885.99
419.129	220.57	276.763	2082.9	2097.42	1906.15
421.47	222.392	279.118	2103.27	2115	1927.8
423.522	223.959	281.147	2124.17	2133.57	1948.69
425.577	225.45	283.317	2146.02	2152.54	1970.12
427.131	226.799	285.211	2167.59	2171.86	1990.16
428.463	228.377	287.185	2188.63	2190.53	2008.1
430.281	230.129	289.091	2209.53	2209.73	2024.77
432.238	232.101	291.257	2229.09	2228.35	2042.9
434.679	234.023	293.089	2249	2248.93	2061.96
436.579	235.692	294.815	2268.89	2268.11	2081.06
438.649	237.117	296.638	2290.84	2287.35	2099.59
441.034	238.727	298.217	2312.12	2306.67	2117.78
443.099	240.351	299.686	2334.09	2325.84	2134.44
445.163	241.967	301.388	2355.77	2345.36	2152.45
447.254	243.62	303.534	2376.89	2363.53	2171.57
449.658	244.947	305.509	2398.12	2383.61	2189.29
451.783	246.268	307.354	2418.76	2401.36	2207.21
454.235	247.878	310.222	2440.05	2422.02	2225.42
456.676	249.607	312.967	2462.04	2442.05	2244.42
458.956	251.233	315.085	2483.26	2462.14	2263.49
461.428	252.879	317.424	2505.84	2482.18	2281.37
463.793	254.632	319.406	2528.42	2502.44	2299.79
466.501	256.221	321.204	2551.04	2522.54	2317.36
468.694	257.674	323.229	2572.05	2541.07	2334.94
471.313	259.32	325.353	2594.04	2560.19	2353.33
473.874	261.312	326.939	2615.71	2578.37	2371.01
476.332	263.014	328.761	2636.25	2598.26	2388.52
478.768	264.575	330.384	2656.9	2618.14	2406.4
480.845	266.443	332.133	2677.58	2637.45	2423.54
482.968	268.624	334.409	2697.67	2656.04	2442.06
485.276	270.737	336.357	2718.02	2674.7	2460.32
487.205	272.617	338.779	2736.14	2694.32	2478.12
489.167	274.22	341.299	2755.84	2712.48	2496.79
491.555	276.039	343.726	2775.93	2729.61	2516.28
493.59	277.449	345.341	2797.04	2747.25	2534.56
495.376	279.152	347.305	2818.22	2764.94	2552.69
496.965	280.857	348.762	2839.31	2782.45	2570.9
498.854	282.381	350.351	2859.78	2799.42	2588.04
501.058	283.934	352.432	2880.87	2816.3	2606.17
503.653	285.533	353.761	2899.61	2833.61	2623.11
506.455	286.939	355.357	2919.33	2850.64	2639.94
508.571	288.52	357.493	2939.07	2870.4	2658.04
510.532	290.23	359.202	2959.2	2887.53	2675.48
512.557	292.099	360.792	2980.55	2906.47	2692.84
514.83	293.995	362.495	3002.77	2922.85	2709.29
516.726	295.954	363.97	3025.05	2940.71	2726.39
518.655	297.751	365.514	3046.82	2959.91	2743.59
520.578	299.607	366.967	3066.77	2979.84	2761.29
522.799	301.683	368.397	3087.52	2998.56	2779.85
525.312	303.995	369.883	3108.92	3018.44	2798.16
527.748	305.884	371.62	3128.42	3037.08	2816.72
529.92	307.811	372.903	3148.47	3054.19	2834.81
532.283	309.887	374.299	3168.22	3070.88	2850.53
534.539	312.332	375.722	3186.71	3088.93	2868.63
536.386	314.655	377.744	3204.94	3107.7	2886.56
538.784	316.375	379.45	3223.51	3126.28	2907.5
541.025	318.078	380.809	3243.76	3143.12	2925.39
543.645	320	382.604	3264.44	3161.71	2943.04
546.301	321.895	384.386	3285.32	3178.53	2963.14
548.514	323.86	385.898	3305.86	3195.98	2981.91
550.723	325.962	387.624	3326.36	3212.12	2999.79
552.758	327.853	389.762	3347.78	3229.3	3018.4
554.46	329.601	391.171	3368.12	3244.47	3036.36
556.285	331.459	392.734	3388.7	3261.13	3055.29
557.86	333.082	394.577	3408.34	3279.88	3075.75
559.688	334.811	396.571	3426.76	3297.03	3092.82
561.149	336.386	398.506	3445.56	3315.29	3111.54
562.733	338.073	400.045	3466.19	3332.76	3129.55
564.164	339.965	401.514	3484.57	3349.4	3146.17
565.809	341.682	403.637	3500.99	3367.74	3164.49
567.936	343.482	405.933	3519.14	3386.47	3181.88
570.035	345.232	408.37	3538.44	3404.95	3200.12
571.954	347.056	410.846	3556.36	3423.15	3218.73
573.817	349.062	413.308	3574.52	3441.78	3237.82
575.878	351.18	414.965	3594.41	3460.59	3256.03
577.744	352.753	416.787	3612.95	3478.02	3274.47
579.446	354.659	418.485	3633.19	3495.82	3292.64
581.428	356.349	420.173	3654.65	3514.51	3310.98
583.602	358.205	421.82	3675.67	3533.78	3329.37
585.569	359.786	423.502	3696.03	3552.22	3346.31
587.584	361.605	425.255	3716.16	3570.46	3364.37
589.458	363.216	427.197	3736.22	3588.16	3382.09
591.129	364.855	428.912	3755.58	3606.6	3398.83
592.793	366.39	430.877	3775.23	3624.87	3417.98
594.581	367.763	432.712	3793.72	3641.55	3437.16
596.327	369.392	434.666	3812.06	3659.15	3455.12
598.095	370.934	436.544	3830.69	3676.4	3472.77
599.751	372.808	438.103	3849.96	3694.76	3491.94
601.495	374.708	439.504	3868.24	3709.84	3511.02
603.357	376.789	441.088	3886.44	3727.2	3529.49
605.143	378.961	442.911	3905.3	3744.21	3546.82
606.71	380.954	444.904	3925.22	3761.92	3564.22
608.44	382.805	446.674	3944.94	3781.23	3583.66
610.469	385.017	448.179	3963.75	3799.98	3602.89
612.568	387.15	450.011	3982.55	3818.74	3620.31
614.659	388.861	451.493	4001.71	3834.81	3637.16
616.891	390.477	453.211	4021.26	3851.77	3656.18
619.363	391.958	455.057	4041.11	3868.91	3673.59
622.129	393.276	456.693	4061.4	3884.18	3689.32
624.696	394.999	458.173	4079.04	3901.27	3707.39
626.822	396.852	459.918	4097.26	3916.37	3723.99
628.868	398.522	462.03	4115.43	3932.73	3740.85
631.182	400.039	463.926	4136.17	3949.24	3757.8
633.628	401.955	465.69	4156.65	3964.82	3774.2
636.046	404.226	467.367	4175.16	3981.82	3790.36
638.357	406.495	469.34	4194.3	3997.68	3806.47
640.754	408.475	471.005	4212.81	4014.07	3824.14
642.819	410.283	472.869	4231.7	4030.54	3842.94
645.39	411.887	474.745	4251.38	4048.07	3861.27
647.999	413.886	476.409	4269.44	4064.44	3877.95
649.815	415.602	477.944	4287.98	4082.27	3896.18
651.891	417.323	479.364	4306.06	4098.78	3913.81
654.225	418.938	481.272	4323.8	4115.63	3930.44

## Sheet: Figure 2_Statistics
Figure 2A
SD (Q1/Q2/Q3/Q4)	DGRP73	normality test (Shapiro-Wilk test)		Passed normality test?
n = 8		Q1_SD	p = 0.1714	Yes
		Q2_SD	p = 0.1576	Yes
		Q3_SD	p = 0.5089	Yes
		Q4_SD	p = 0.4457	Yes
		equal variance test (Brown-Forsythe test)	***p = 0.0005	Are SDs significantly different?
				Yes
		Paired t test
		Q1 vs. Q2	*p = 0.0104
		Q1 vs. Q3	**p = 0.0073
		Q1 vs. Q4	**p = 0.0046
	DGRP563	normality test (Shapiro-Wilk test)		Passed normality test?
		Q1_SD	p = 0.2401	Yes
		Q2_SD	p = 0.3518	Yes
		Q3_SD	p = 0.7343	Yes
		Q4_SD	p = 0.6933	Yes
		equal variance test (Brown-Forsythe test)	*p = 0.0114	Are SDs significantly different?
				Yes
		Paired t test
		Q1 vs. Q2	*p = 0.0273
		Q1 vs. Q3	**p = 0.0065
		Q1 vs. Q4	**p = 0.0019
	DGRP370	normality test (Shapiro-Wilk test)		Passed normality test?
		Q1_SD	p = 0.0600	Yes
		Q2_SD	p = 0.3143	Yes
		Q3_SD	p = 0.3623	Yes
		Q4_SD	p = 0.6594	Yes
		equal variance test (Brown-Forsythe test)	p = 0.4011	Are SDs significantly different?
				No
		Paired t test
		Q1 vs. Q2	***p = 0.0002
		Q1 vs. Q3	**p = 0.0074
		Q1 vs. Q4	*p = 0.0204
walking speed_avg (Q1/Q2/Q3/Q4)	DGRP73	normality test (Shapiro-Wilk test)		Passed normality test?
		Q1	*p = 0.0156	No
		Q2	*p = 0.0207	No
		Q3	p = 0.1395	Yes
		Q4	*p = 0.0215	No
		equal variance test (Brown-Forsythe test)	p = 0.1248	Are SDs significantly different?
				No
		Wilcoxon matched-pairs signed rank test
		Q1 vs. Q2	**p = 0.0078
		Q1 vs. Q3	**p = 0.0078
		Q1 vs. Q4	**p = 0.0078
	DGRP563	normality test (Shapiro-Wilk test)		Passed normality test?
		Q1	p = 0.0868	Yes
		Q2	p = 0.0948	Yes
		Q3	p = 0.3251	Yes
		Q4	p = 0.4160	Yes
		equal variance test (Brown-Forsythe test)	p = 0.3574	Are SDs significantly different?
				No
		Paired t test
		Q1 vs. Q2	**p = 0.0037
		Q1 vs. Q3	**p = 0.0035
		Q1 vs. Q4	**p = 0.0027
	DGRP370	normality test (Shapiro-Wilk test)		Passed normality test?
		Q1	p = 0.5070	Yes
		Q2	p = 0.7026	Yes
		Q3	*p = 0.0398	No
		Q4	*p = 0.0387	No
		equal variance test (Brown-Forsythe test)	*p = 0.0186	Are SDs significantly different?
				Yes
		Wilcoxon matched-pairs signed rank test
		Q1 vs. Q2	**p = 0.0078
		Q1 vs. Q3	**p = 0.0078
		Q1 vs. Q4	*p = 0.0156
Figure 2B
SD (Q1/Q2/Q3/Q4)	DGRP360	normality test (Shapiro-Wilk test)		Passed normality test?
n = 8		Q1_SD	p = 0.2871	Yes
		Q2_SD	p = 0.0522	Yes
		Q3_SD	p = 0.5608	Yes
		Q4_SD	*p = 0.0148	No
		equal variance test (Brown-Forsythe test)	p = 0.9615	Are SDs significantly different?
				No
		Wilcoxon matched-pairs signed rank test
		Q1 vs. Q2	p = 0.1406
		Q1 vs. Q3	p = 0.2344
		Q1 vs. Q4	*p = 0.0156
	DGRP707	normality test (Shapiro-Wilk test)		Passed normality test?
		Q1_SD	p = 0.8889	Yes
		Q2_SD	p = 0.5689	Yes
		Q3_SD	p = 0.9415	Yes
		Q4_SD	p = 0.7426	Yes
		equal variance test (Brown-Forsythe test)	p = 0.6862	Are SDs significantly different?
				No
		Paired t test
		Q1 vs. Q2	p = 0.2682
		Q1 vs. Q3	p = 0.2572
		Q1 vs. Q4	p = 0.0695
	DGRP317	normality test (Shapiro-Wilk test)		Passed normality test?
		Q1_SD	p = 0.5651	Yes
		Q2_SD	p = 0.7056	Yes
		Q3_SD	p = 0.8871	Yes
		Q4_SD	p = 0.9328	Yes
		equal variance test (Brown-Forsythe test)	p = 0.9795	Are SDs significantly different?
				No
		Paired t test
		Q1 vs. Q2	p = 0.5933
		Q1 vs. Q3	p = 0.2455
		Q1 vs. Q4	p = 0.3574
walking speed_avg (Q1/Q2/Q3/Q4)	DGRP360	normality test (Shapiro-Wilk test)		Passed normality test?
		Q1	p = 0.6949	Yes
		Q2	p = 0.5275	Yes
		Q3	p = 0.4789	Yes
		Q4	p = 0.5208	Yes
		equal variance test (Brown-Forsythe test)	p = 0.2626	Are SDs significantly different?
				No
		Paired t test
		Q1 vs. Q2	*p = 0.0212
		Q1 vs. Q3	p = 0.0888
		Q1 vs. Q4	*p = 0.0384
	DGRP707	normality test (Shapiro-Wilk test)		Passed normality test?
		Q1	p = 0.2820	Yes
		Q2	p = 0.0814	Yes
		Q3	*p = 0.0471	No
		Q4	p = 0.2343	Yes
		equal variance test (Brown-Forsythe test)	p = 0.9669	Are SDs significantly different?
				No
		Wilcoxon matched-pairs signed rank test
		Q1 vs. Q2	*p = 0.0391
		Q1 vs. Q3	**p = 0.0078
		Q1 vs. Q4	p = 0.0547
	DGRP317	normality test (Shapiro-Wilk test)		Passed normality test?
		Q1	p = 0.1819	Yes
		Q2	p = 0.1753	Yes
		Q3	p = 0.3201	Yes
		Q4	p = 0.9190	Yes
		equal variance test (Brown-Forsythe test)	p = 0.9863	Are SDs significantly different?
				No
		Paired t test
		Q1 vs. Q2	**p = 0.0024
		Q1 vs. Q3	**p = 0.0019
		Q1 vs. Q4	**p = 0.0010

## Sheet: Figure 2 - Supplement 1B_data
Figure 2 - Supplement 1B
SD
DGRP73_grp	DGRP73_iso	DGRP563_grp	DGRP563_iso	DGRP370_grp	DGRP370_iso		DGRP360_grp	DGRP360_iso	DGRP707_grp	DGRP707_iso	DGRP317_grp	DGRP317_iso
13.6314	22.7538	22.1748	22.4681	14.181	24.9315		38.6836	34.5545	33.6106	33.2047	33.3332	34.8748
17.4483	22.1183	16.8699	26.0503	19.801	22.6303		34.8839	35.2655	37.2971	37.3173	34.5797	30.811
21.2178	17.3792	17.4708	23.5015	22.9446	26.2661		34.7992	36.7854	35.6583	35.0146	37.5132	36.4462
14.6971	18.7313	21.8848	22.0719	18.8064	19.8051		34.6013	31.418	35.2322	35.1431	34.1585	35.4093
19.9503	20.5139	22.9617	20.1496	17.5313	25.7857		35.7073	34.4337	38.8385	33.2481	33.0783	33.688
17.9786	24.4468	20.9077	20.6353	19.1561	22.7565		34.9355	32.0538	31.0639	34.7935	33.7953	32.9856
18.6088	19.8513	17.5823	25.0234	18.8673	24.782		37.7849	35.9774	34.2863	32.3065	36.3678	38.8385
14.0635	18.7838	20.4902	23.1456	23.2753	21.2665		37.6292	34.5508	33.5516	33.3427	35.4316	33.1062
walking speed
DGRP73_grp	DGRP73_iso	DGRP563_grp	DGRP563_iso	DGRP370_grp	DGRP370_iso		DGRP360_grp	DGRP360_iso	DGRP707_grp	DGRP707_iso	DGRP317_grp	DGRP317_iso
0.155687	0.445258	0.186615	0.615249	0.132337	0.535722		2.72135	2.09788	2.14388	2.31583	3.1673	2.12582
0.169643	0.388388	0.403805	0.442651	0.295216	0.390982		2.56251	2.87697	2.81329	1.69862	3.01249	2.10971
0.40644	0.300277	0.3663	0.345959	0.438085	0.79291		1.93402	1.15048	2.50459	3.33284	2.17904	1.72433
0.26215	0.611556	0.398947	0.35943	0.383683	0.60388		3.81426	3.68444	2.75542	2.79494	2.03912	2.54324
0.355932	0.512479	0.424874	0.546705	0.340981	0.578022		3.02933	2.40489	2.94797	3.05999	2.85196	1.93643
0.301195	0.514197	0.471844	0.229406	0.155828	0.830382		1.89414	1.83685	2.28227	2.48645	1.92504	3.1468
0.313614	0.493652	0.328881	0.715886	0.39856	0.634206		2.14674	3.72416	1.49769	2.59682	2.27087	3.21596
0.266949	0.552697	0.133118	0.695969	0.194208	0.637969		1.65025	3.16188	2.50574	1.75945	1.85007	3.52867
centroid velocity
DGRP73_Grp	DGRP73_Iso	DGRP563_Grp	DGRP563_Iso	DGRP370_Grp	DGRP370_Iso		DGRP360_Grp	DGRP360_Iso	DGRP707_Grp	DGRP707_Iso	DGRP317_Grp	DGRP317_Iso
0.135455	0.487229	0.162424	0.34697	0.119394	0.300649		0.557576	0.399567	0.449567	0.47316	0.62316	0.444156
0.250909	0.248052	0.163939	0.132684	0.091212	0.21039		0.531385	0.517965	0.565801	0.372727	0.653463	0.43961
0.091515	0.169913	0.159697	0.304545	0.127576	0.251299		0.394589	0.241991	0.504329	0.624242	0.45974	0.348052
0.079394	0.358658	0.13	0.207143	0.117273	0.429437		0.705844	0.629221	0.557576	0.550866	0.438961	0.487446
0.097273	0.339827	0.165152	0.217965	0.094545	0.231818		0.541558	0.470779	0.560606	0.627489	0.438961	0.41645
0.317879	0.201948	0.203333	0.241775	0.284545	0.189177		0.425758	0.361688	0.548918	0.525758	0.470346	0.626407
0.079394	0.387662	0.247576	0.321212	0.199091	0.233333		0.415801	0.687662	0.398918	0.525541	0.50368	0.560606
0.097273	0.195238	0.04303	0.254545	0.079394	0.180736		0.317965	0.584632	0.608442	0.383766	0.421429	0.654545

## Sheet: Figure 2 - Supplement 1C_data
Figure 2 - Supplement 1C
averaged
DGRP73	DGRP563	DGRP370	DGRP360	DGRP707	DGRP317
525.26	626.434	447.053	4461.03	3518.04	5161.32
1187.91	602.178	345.338	4196.69	4606.09	5472.2
365.87	600.249	518.578	3173.05	4111.01	3548.33
323.621	491.589	472.798	6232.3	4522.45	3347.26
422.188	619.008	402.084	4969.11	4825.89	3029.03
875.842	416.909	383.213	4969.11	3029.03	3144.53
1246.61	197.512	308.71	3087.87	3119.98	5871.05
316.637	296.299	473.728	3501.24	3711.01	3351.34
individual
DGRP73	DGRP563	DGRP370	DGRP360	DGRP707	DGRP317
359.79	587.054	373.499	4514.65	2880.43	5504.28
384.242	308.004	632.226	4381.13	3332.7	3735.23
233.785	763.222	361.905	5034.53	3895.7	4258.81
571.378	362.104	588.173	3822.35	3874.97	4823.56
282.653	673.6	412.779	4851.2	2820.6	4955.98
516.123	780.443	283.395	4596.78	3467.88	7113.59
252.506	475.234	355.548	2926.91	3697.03	6585.9
521.394	398.841	519.213	4679.58	3863.64	3202.14
2110.43	384.846	360.725	5372.78	3817.64	7242.57
308.906	511.836	366.768	2145.09	3543.03	4783.08
617.455	448.931	351.418	4379.92	2951.37	6348.76
494.189	461.256	371.05	5120.36	3236.94	5716
320.381	533.041	387.978	4783.38	4120.09	5272.79
671.631	423.305	525.922	4791.11	2897.09	6167.13
482.241	1205.44	640.584	5202.7	4037.32	4511.39
277.062	1705.79	621.666	4773.96	3852.26	2359.9
1241.6	569.486	333.099	3736.81	4853.48	5063.97
1653.97	413.137	319.321	3955.03	4704.87	2918.23
1127.39	457.268	445.505	4424.26	4346.91	7012.36
1064.87	417.48	279.57	4130.97	4132.17	6223.5
1189.16	442.022	273.979	4996.6	4387.91	7076.03
1089.96	730.662	309.936	3822.34	4915.65	7646.75
1209.67	933.27	204.018	4156.58	4803.05	3367.3
1098.08	413.706	318.849	3622.1	4648.63	1322.34
804.673	832.59	289.757	4476.18	4609.01	5606.43
974.94	417.567	418.33	3788.74	4741.56	7247.92
1267.69	664.27	628.901	4269.37	4414.93	8300.25
1492.61	932.058	339.689	4396.71	4414	5481.38
1083.35	1151.19	307.067	4724.58	4518.23	5894.42
1508.34	416.844	460.2	4519.65	4272.42	3631.46
921.551	394.964	254.053	3656.85	5086.5	5566.73
1278.67	448.326	343.13	4470.3	4848.11	5196.09
332.574	427.012	348.382	2982.21	4184.34	4109.42
224.661	1005.89	405.689	3531.84	3782.96	2219.11
181.644	488.033	393.413	3247.15	4360.6	3228.59
318.816	419.267	394.165	2780.45	4370.08	3518.3
417.3	488.653	709.885	3778.93	4251.52	4657.38
497.253	821.507	626.414	2929.54	4545.52	3816.74
285.754	881.219	577.247	3279.91	4336.61	3600.62
362.136	554.185	497.321	3303.02	5059.62	3849.56
458.733	409.227	442.462	3215.03	3838.67	4447.82
295.248	494.43	438.632	2735.92	3633.2	3596.73
519.535	476.743	602.737	3289.77	4298.35	3902.64
301.126	486.879	681.938	2697.96	3926.88	3603.65
398.149	1371.52	558.314	3606.05	4175.98	2798.03
554.357	452.332	634.22	3764.44	4071.06	2111.52
342.661	380.739	547.989	2675.3	2995.73	3159.83
363.974	446.347	438.447	2951.24	3945.04	4153.3
266.845	639.743	354.112	6696.96	4761.18	3103.52
321.133	409.131	468.564	7903.44	4497.85	3549.95
282.088	380.493	472.039	6309.61	4382.66	3394.09
493.443	694.577	543.666	7347.27	4407.34	3409.51
252.67	298.099	413.538	5474.22	4819.15	3538.45
228.712	451.803	375.477	8275.52	3859.11	3609.78
389.514	472.873	710.414	6858.44	5248.86	3975.03
236.141	635.325	269.997	6576.56	4160.45	2752.78
458.086	657.206	458.259	4836.44	5022.43	2348.51
357.006	355.517	388.049	5238.1	4158.62	2820.35
304.793	493.613	529.372	7095.1	4582.93	4167.35
465.542	412.623	579.248	6564.54	4111.86	3207.41
420.613	422.248	429.57	5145.46	5048.6	3038.3
235.568	549.532	765.116	6889.06	3972.71	3162.44
257.784	701.954	551.184	3954.2	4555.08	3479.11
208	290.689	256.16	4551.92	4770.41	3999.62
264.225	555.43	483.813	4029.56	4908.43	3295.52
465.44	906.041	347.424	5121.44	5269.99	3789.63
258.88	485.014	256.597	5631.7	4186.57	2775.72
558.915	1101.81	400.67	5246.33	4829.93	3238.9
387.027	748.445	335.024	4626.81	3931.91	3063.16
430.119	549.777	394.233	5689.27	4532.08	2694.39
477.1	496.821	509.271	4763.43	3740.33	3040.86
312.819	337.578	321.762	5467.12	5182.62	3158.46
565.261	576.396	472.251	6003.13	5000.02	3439.77
284.651	679.74	431.541	3882.57	4688.81	3219.24
211.966	572.417	309.085	4844.52	5237.84	3049.07
1068.33	681.052	381.577	3700.58	5678.65	2660.91
344.32	493.867	516.737	3146.79	5272.09	1828.39
425.817	703.253	515.043	5517.48	5212.28	2844.94
397.168	526.482	500.549	4723.16	4961.29	2839.29
302.958	489.998	257.77	7111.95	4581.35	3526.21
1052.59	374.731	189.925	4029.56	3295.52	2071.93
885.912	140.728	365.055	5121.44	3789.63	2413.72
1028.6	599.208	264.353	5631.7	2775.72	3372.72
716.093	281.392	319.855	5246.33	3238.9	3802
945.578	815.94	330.418	4626.81	3063.16	3727.72
987.895	459.065	322.579	5689.27	2694.39	3522.97
879.796	1108.19	549.824	4763.43	3040.86	3288.14
674.386	503.301	573.807	5467.12	3158.46	3819.18
753.288	274.103	366.741	6003.13	3439.77	3018.39
1133.95	235.232	358.031	3882.57	3219.24	3622.91
912.311	221.464	304.544	4844.52	3049.07	3432.89
855.767	185.799	385.907	3700.58	2660.91	3201.9
786.252	273.662	230.118	3146.79	1828.39	2969.79
679.187	327.124	356.505	5517.48	2844.94	2496.46
585.415	221.793	467.165	4723.16	2839.29	3331.91
1136.45	648.81	746.578	7111.95	3526.21	2219.79
935.592	133.226	269.938	2499.2	1473.95	6217.79
930.589	102.209	372.69	1454.98	2320.84	6234.15
460.958	156.469	230.308	3883.16	3147.66	6129.01
1606.29	167.991	254.779	3290.93	1512	6215.68
397.84	141.241	296	2374.7	3580.54	6047.95
1879.47	113.378	454.762	2470.79	4628.27	5526.4
1698.09	143.042	595.177	2441.2	3346.29	5330.53
1093.82	106.912	269.284	2692.89	3059.68	5961.86
915.397	405.087	292.805	3594.8	2207.57	6373.2
1222.75	354.446	236.623	3116.52	2183.69	6359.07
2293.91	342.6	300.739	2055.51	3132.06	5952.89
1577.9	342.467	266.994	4789.61	4685.99	5837.6
1391.07	135.327	296.319	3468.75	3088.47	4649.9
1454.71	176.54	220.316	3726.58	3261.12	5587.1
950.925	141.459	279.622	3577.61	4136.06	5577.55
1136.45	197.8	303.002	3968.63	4155.43	5936.17
252.349	269.495	332.982	2757.47	4079.12	3303.41
407.596	405.492	266.44	3316.61	3654.37	3226.3
371.49	117.614	400.217	4289.11	4828.58	3357
223.57	341.833	503.917	3431.52	2381.85	2337.68
515.247	276.86	264.085	3208.74	3668.07	3606.95
461.461	319.666	494.017	4966.07	2731.01	3238.75
312.216	254.103	769.404	3538.86	4530.28	3366.55
251.52	294.556	464.605	3163.78	3994.93	2972.36
237.935	438.124	409.755	3049.96	3419.56	3806.83
356.909	243.008	435.731	3819.41	3596.12	4285.34
284.78	229.374	479.547	3948.16	2873.44	3193.33
238.103	276.903	326.495	3629.7	3577.88	3284.22
461.084	316.972	610.81	2691.53	4653.89	2564.54
244.171	332.356	501.789	4197.66	3865.99	4292.97
282.916	353.115	550.465	3726.35	3970.66	3576.45
164.835	271.309	769.396	2284.84	3550.45	3208.75

## Sheet: Figure 2 - Supplement 2_data
Figure 2 - Supplement 2
walking speed (single fly)
DGRP73					DGRP563					DGRP370
Q1_SD	Q2_SD	Q3_SD	Q4_SD		Q1_SD	Q2_SD	Q3_SD	Q4_SD		Q1_SD	Q2_SD	Q3_SD	Q4_SD
0.179493	0.08811	0.078764	0.060605		0.01634	0.039541	0.015362	0.025644		0.003998	0.007506	0.07469	0.112808
0.010988	0.165535	0.230465	0.044658		0.119975	0.223187	0.260329	0.269998		0.015723	0.069278	0.031998	0.037096
0.018926	0.008124	0.006909	0.002015		0.171157	0.328548	0.151202	0.035885		0.010518	0.001161	0	0
0	0	0.091785	0.151711		0	0.032037	0.00122	0.014176		0.052696	0.051866	0	0
0.066307	0.027562	0.024904	0.102218		0.029999	0.044552	0.084116	0.085322		0.085012	0.132579	0.144175	0.196941
0.066837	0.02777	0.025093	0.103047		0.014304	0.008783	0.010027	0.027957		0.09979	0.052095	0.0196	0.110048
0.008778	0.082734	0.013226	0		0.004279	0.03839	0.131873	0.069269		0.032662	0	0	0
0.00444	0	0	0		0.04178	0.088654	0.088991	0.065208		0.002924	0.01246	0.010319	0.008062
0.020146	0.096591	0.059182	0.058065		0.107569	0.096088	0.210443	0.213459		0.024456	0.067205	0.070217	0.085701
0.225019	0	0	0		0.034229	0.026863	0.017804	0.068428		0.06006	0.045354	0.065177	0.040469
0.024105	0.119246	0.086137	0.238216		0.110239	0.114066	0.033565	0.06271		0.025293	0.029361	0.044822	0.03264
0.02145	0.031469	0.064414	0.076796		0.099982	0.12928	0.201945	0.156279		0.134917	0.094065	0.136794	0.120929
0.043296	0.118721	0	0		0.081724	0.051988	0.048397	0.123568		0.084277	0.107137	0.136313	0.125354
0.039671	0.06062	0.086427	0.08208		0.139169	0.073721	0.125757	0.150694		0.018963	0.056243	0.066573	0.066495
0.101009	0.02022	0.101936	0.082225		0.082439	0.165928	0.066766	0.06365		0.068997	0.076569	0.062934	0.082786
0.036973	0.02204	0.010273	0.050574		0.136852	0.120881	0.110848	0.076337		0.081781	0.041872	0.061836	0.060345
0.065561	0.071317	0.116275	0.105014		0.094502	0.102774	0.179815	0.123738		0.012158	0.049066	0.050681	0.053692
0.026825	0.024707	0.057129	0.003634		0.049785	0.077892	0.074531	0.105462		0.08794	0.111268	0.02936	0.026756
0.105932	0.086911	0.063061	0.095234		0.03323	0.056282	0.056414	0.046249		0.014058	0.05278	0.063602	0.055226
0.046667	0.029418	0	0.01311		0.043586	0.013546	0.136046	0.006873		0.009555	0.11626	0.10167	0.090031
walking speed (single fly)
DGRP360					DGRP707					DGRP317
Q1_SD	Q2_SD	Q3_SD	Q4_SD		Q1_SD	Q2_SD	Q3_SD	Q4_SD		Q1_SD	Q2_SD	Q3_SD	Q4_SD
1.73173	1.45698	1.82841	2.20257		0.54708	0.783715	1.30657	1.15952		1.99128	2.91852	2.62893	2.82457
1.51195	1.40576	0.30017	0.151733		0.619108	1.33676	0.812057	0.753234		0.799714	1.56416	2.35897	3.02998
0.490717	0.783076	0.945944	1.10563		0.838831	1.60597	1.52194	1.11622		0.250222	0.109559	0.461654	0.260706
2.55583	2.9747	2.35245	2.59263		0.467948	0.515603	1.36248	0.931569		0.812708	0.880561	1.23648	0.872246
1.31102	1.21877	1.24804	1.53998		2.18028	1.61862	1.87742	1.69914		0.786041	0.92778	1.01578	0.902243
0.387703	0.450177	0.909878	0.451551		0.698728	1.61651	1.12532	1.08492		0.769557	1.53635	1.60193	1.83283
0.589485	0.648004	1.15486	0.682485		0.237294	0.415928	2.24985	2.68123		0.235623	0.223206	0.215786	0.715909
1.29337	1.32585	1.39188	1.50026		0.174123	0.527537	1.24126	1.01673		0.209403	0.152747	0.315839	0.275531
0.603503	1.65844	1.73276	2.11487		1.05214	1.5305	0.942015	1.17727		1.17142	1.42289	1.0033	1.31645
0.932593	0.776957	1.40198	1.71989		1.45262	1.37402	1.79331	2.1355		0.324801	0.503623	1.3416	2.13936
1.37724	1.49905	2.3119	2.14268		1.22819	1.65154	1.13348	1.74316		1.7661	1.62466	1.39442	1.18678
1.10555	2.64386	2.36385	3.0934		2.04484	0.734401	1.0115	0.841209		0.169049	1.42061	1.30558	1.73144
0.467958	1.38793	1.64285	1.64092		1.11424	1.44361	1.13406	0.952876		0.918151	0.661048	1.41688	1.24866
1.17024	1.18892	1.15529	1.05585		1.0224	1.3151	1.49494	1.86219		1.33568	0.942289	1.03088	1.0093
2.27037	2.23288	2.25624	2.0239		0.88696	2.21337	2.16601	1.82104		0.410599	1.12833	1.1789	1.43887
1.06009	1.22198	2.17856	2.03211		1.56451	1.79086	2.22273	2.64173		0.634498	0.52861	0.953852	1.17014
2.30002	1.21081	1.25066	1.32499		1.42686	1.16165	2.28633	1.71343		1.87283	1.01322	1.54676	2.12639
1.21702	1.27805	1.72453	1.66027		2.25322	1.63742	1.86185	1.91615		2.02567	1.01989	1.57292	1.45779
1.34692	1.30248	1.56953	1.36282		1.22021	1.84611	2.64872	2.32145		1.25608	1.82717	1.12461	1.40547
2.35797	2.86893	2.50903	2.47542		1.96311	2.30116	2.84884	1.82623		1.15394	0.939462	1.84902	1.3857

## Sheet: Figure 2 - Supplement 4_data
Figure 2 - Supplement 4
rut1	DGRP73	DGRP563	DGRP370	DGRP360	DGRP707	DGRP317
13.2	0.2	0	0	0	0	0
20.8	0	0	0	0	0	0
10.7	0	0	0	0	0	0
13.7	0	0	0	0	0	0
5.7	0	0	0	0	0	0
4.5	0	0	0	0	0	0
8.3	0	0	0	0	0	0
11.8	0	0	0	0	0	0

## Sheet: Figure 2 - Supplement 1_Stat
Figure 2 - Supplement 1B	short SD
SD	Unpaired t test
(n = 8)	DGRP73_grp vs. DGRP73_iso	*p = 0.0212
	DGRP563_grp vs. DGRP563_iso	*p = 0.0225
	DGRP370_grp vs. DGRP370_iso	**p = 0.0062
walking speed	Unpaired t test
(n = 8)	DGRP73_grp vs. DGRP73_iso	***p = 0.0007
	DGRP563_grp vs. DGRP563_iso	p = 0.0599
	DGRP370_grp vs. DGRP370_iso	***p = 0.0001
centroid velocity	Unpaired t test
(n = 8)	DGRP73_grp vs. DGRP73_iso	**p = 0.0088
	DGRP563_grp vs. DGRP563_iso	*p = 0.0113
	DGRP370_grp vs. DGRP370_iso	**p = 0.0088
	Long SD
SD	Unpaired t test
(n = 8)	DGRP360_grp vs. DGRP360_iso	p = 0.0635
	DGRP707_grp vs. DGRP707_iso	p = 0.5367
	DGRP317_grp vs. DGRP317_iso	p = 0.8018
walking speed	Unpaired t test
(n = 8)	DGRP360_grp vs. DGRP360_iso	p = 0.7230
	DGRP707_grp vs. DGRP707_iso	p = 0.7807
	DGRP317_grp vs. DGRP317_iso	p = 0.6740
centroid velocity	Unpaired t test
(n = 8)	DGRP360_grp vs. DGRP360_iso	p = 0.9956
	DGRP707_grp vs. DGRP707_iso	p = 0.7468
	DGRP317_grp vs. DGRP317_iso	p = 0.9354
Figure 2 - Supplement 1C
travel distance	ordinary 1-way ANOVA
averaged (n exp = 8)	DGRP73 vs. DGRP563	p = 0.9732
	DGRP73 vs. DGRP370	p = 0.9732
	DGRP73 vs. DGRP360	****p <0.0001
	DGRP73 vs. DGRP707	****p <0.0001
	DGRP73 vs. DGRP317	****p <0.0001
	DGRP563 vs. DGRP370	p = 0.9732
	DGRP563 vs. DGRP360	****p <0.0001
	DGRP563 vs. DGRP707	****p <0.0001
	DGRP563 vs. DGRP317	****p <0.0001
	DGRP370 vs. DGRP360	****p <0.0001
	DGRP370 vs. DGRP707	****p <0.0001
	DGRP370 vs. DGRP317	****p <0.0001
	DGRP360 vs. DGRP707	p = 0.8679
	DGRP360 vs. DGRP317	p = 0.9732
	DGRP707 vs. DGRP317	p = 0.9732
travel distance	normality test (Shapiro-Wilk test)		Passed normality test?
individual (n = 128)	DGRP73	****p <0.0001	No
	DGRP563	****p <0.0001	No
	DGRP370	***p = 0.0002	No
	DGRP360	*p = 0.0108	No
	DGRP707	*p = 0.0200	No
	DGRP317	****p <0.0001	No
	equal variance test (Brown-Forsythe test)	****p <0.0001	Are SDs significantly different?
			Yes
	ART 1-way ANOVA, Wilcoxon Rank-Sum test
	DGRP73 vs. DGRP563	p = 0.3608
	DGRP73 vs. DGRP370	*p = 0.0397
	DGRP73 vs. DGRP360	****p <0.0001
	DGRP73 vs. DGRP707	****p <0.0001
	DGRP73 vs. DGRP317	****p <0.0001
	DGRP563 vs. DGRP370	p > 0.9999
	DGRP563 vs. DGRP360	****p <0.0001
	DGRP563 vs. DGRP707	****p <0.0001
	DGRP563 vs. DGRP317	****p <0.0001
	DGRP370 vs. DGRP360	****p <0.0001
	DGRP370 vs. DGRP707	****p <0.0001
	DGRP370 vs. DGRP317	****p <0.0001
	DGRP360 vs. DGRP707	p = 0.7081
	DGRP360 vs. DGRP317	p = 0.9960
	DGRP707 vs. DGRP317	p > 0.9999

## Sheet: Figure 2 - Supplement 2_Stat
Figure 2 - Supplement 2	DGRP73	normality test (Shapiro-Wilk test)		Passed normality test?
single-fly walking speed		Q1	***p = 0.0007	No
n = 20		Q2	p = 0.0503	Yes
		Q3	**p = 0.0041	No
		Q4	*p = 0.0129	No
		equal variance test (Brown-Forsythe test)	p = 0.9066	Are SDs significantly different?
				No
		Wilcoxon matched-pairs signed rank test
		Q1 vs. Q2	p = 0.8596
		Q1 vs. Q3	p = 0.8983
		Q1 vs. Q4	p = 0.4524
	DGRP563	normality test (Shapiro-Wilk test)		Passed normality test?
		Q1	p = 0.3027	Yes
		Q2	**p = 0.0036	No
		Q3	p = 0.4054	Yes
		Q4	*p = 0.0363	No
		equal variance test (Brown-Forsythe test)	p = 0.7257	Are SDs significantly different?
				No
		Wilcoxon matched-pairs signed rank test
		Q1 vs. Q2	p = 0.0897
		Q1 vs. Q3	p = 0.1054
		Q1 vs. Q4	p = 0.1231
	DGRP370	normality test (Shapiro-Wilk test)		Passed normality test?
		Q1	*p = 0.0259	No
		Q2	p = 0.4406	Yes
		Q3	p = 0.0903	Yes
		Q4	p = 0.2353	Yes
		equal variance test (Brown-Forsythe test)	p = 0.7038	Are SDs significantly different?
				No
		Wilcoxon matched-pairs signed rank test
		Q1 vs. Q2	p = 0.2024
		Q1 vs. Q3	p = 0.2774
		Q1 vs. Q4	p = 0.1650
	DGRP360	normality test (Shapiro-Wilk test)		Passed normality test?
		Q1	p = 0.1245	Yes
		Q2	*p = 0.0158	No
		Q3	p = 0.4659	Yes
		Q4	p = 0.9906	Yes
		equal variance test (Brown-Forsythe test)	p = 0.9084	Are SDs significantly different?
				No
		Wilcoxon matched-pairs signed rank test
		Q1 vs. Q2	p = 0.1650
		Q1 vs. Q3	*p = 0.0296
		Q1 vs. Q4	*p = 0.0328
	DGRP707	normality test (Shapiro-Wilk test)		Passed normality test?
		Q1	p = 0.5198	Yes
		Q2	p = 0.2098	Yes
		Q3	p = 0.2477	Yes
		Q4	p = 0.1168	Yes
		equal variance test (Brown-Forsythe test)	p = 0.8273	Are SDs significantly different?
				No
		Paired t test
		Q1 vs. Q2	p = 0.1091
		Q1 vs. Q3	**p = 0.0050
		Q1 vs. Q4	*p = 0.0211
	DGRP317	normality test (Shapiro-Wilk test)		Passed normality test?
		Q1	p = 0.0868	Yes
		Q2	p = 0.1699	Yes
		Q3	p = 0.3920	Yes
		Q4	p = 0.3522	Yes
		equal variance test (Brown-Forsythe test)	p = 0.9166	Are SDs significantly different?
				No
		Paired t test
		Q1 vs. Q2	p = 0.3543
		Q1 vs. Q3	*p = 0.0153
		Q1 vs. Q4	*p = 0.0112
