# Supplementary material for: Drosulfakinin signaling encodes early-life memory for adaptive social plasticity
Source: eLife. 2024 Dec 18;13:e103973. doi: 10.7554/eLife.103973 (PMC11706606; doi:10.7554/eLife.103973)
Supplement: Figure 3—source data 1. [file elife-103973-fig3-data1.xlsx]

## Sheet: Figure 3A_Raw data
Figure 3A
larvae per cluster
DGRP73	DGRP563	DGRP370	DGRP360	DGRP707	DGRP317
5	5	4	6	3	4
4	4	5	5	2	3
6	6	4	3	5	3
8	5	5	4	4	4
5	4	6	3	3	5
4	4	8	4	4	5
5	4	5	3	3	3
4	5	5	4	5	3
5	4	4	6	6	4
4	4	4	5	3	3
4	5	4	5	4	5
5	6	4	2	3	8
5	3	5	3	3	4
4	4	4	4	5	3
3	4	3	3	5	5
5	4	5	6	6	4
4	5	4	3	7	4
5	4	5	2	4	5
4	4	4	2	5	4
8	7	4	3	3	3
4	5	4	4	6	3
6	4	5	2	5	3
7	5	5	4	2	4
5	4	6	5	4	5
8	4	7	7	5	3
5	4	6	3	5	3
4	5	7	5	4	4
5	4	5	4	5	5
5	4	6	4	5	3
5	5	7	5	3	4
5	3	2	2	3	2
4	4	4	3	2	3
4	4	3	2	2	3
4	4	4	2	2	3
4	4	6	3	1	2
4	4	5	4	3	4
4	4	3	3	3	2
3	4	5	1	4	2
4	4	3	3	1	2
4	4	4	2	3	3
4	4	3	2	2	3
4	3	4	2	2	2
4	3	4	3	3	4
2	4	4	4	4	3
2	3	3	2	3	4
5	4	5	3	5	3
4	4	3	2	4	3
3	4	5	2	3	2
4	4	3	2	3	2
5	3	4	3	3	2
4	5	4	4	2	3
6	4	4	2	3	2
3	4	4	3	2	3
4	4	4	3	4	4
5	3	5	3	4	2
3	4	5	3	4	3
4	4	3	2	2	2
4	3	4	3	3	2
4	4	6	3	3	2
5	3	4	3	3	3
3	3	2	2	2	1
3	3	4	2	1	2
3	3	3	2	1	3
2	4	4	1	2	2
3	3	3	3	1	2
4	2	2	2	3	1
3	3	3	3	2	1
3	4	3	1	2	2
3	3	3	2	1	2
3	2	3	2	2	1
3	3	3	1	2	3
4	3	2	2	2	1
4	2	4	3	3	1
2	2	2	1	2	2
2	3	2	2	2	0
3	4	4	3	2	2
4	3	3	1	1	2
2	3	2	2	2	2
2	1	3	0	1	2
4	2	3	3	2	1
3	3	4	4	1	3
2	3	2	2	3	1
2	2	3	1	1	1
3	3	3	1	1	3
1	3	3	2	3	1
3	3	4	2	3	2
3	4	3	2	2	1
2	2	3	3	0	1
4	3	3	1	4	1
4	2	3	2	2	2
1	3	0	1	2	0
2	0	1	1	0	1
1	2	1	1	1	2
1	2	1	1	1	1
3	3	0	1	1	2
0	1	1	1	0	0
0	0	2	2	1	1
2	0	2	0	2	2
3	1	0	1	0	1
1	1	1	1	1	0
2	3	1	1	1	1
3	2	2	1	0	1
0	0	1	1	1	2
0	1	1	1	1	1
0	0	1	2	2	0
2	1	1	1	1	1
1	3	2	1	0	2
1	2	0	1	2	1
1	0	1	0	0	0
3	0	0	2	0	1
2	2	3	1	1	2
2	1	1	1	1	0
1	1	2	1	1	1
2	3	1	0	0	2
1	0	2	1	1	1
1	1	1	1	2	2
3	3	4	1	1	0
1	2	3	0	0	1
2	1	2	0	1	1
2	0	1	1	1	1

## Sheet: Figure 3C_Raw data
Figure 3C
digging depth
DGRP73_grp	DGRP73_iso	DGRP563_grp	DGRP563_iso	DGRP370_grp	DGRP370_iso	DGRP360_grp	DGRP360_iso	DGRP707_grp	DGRP707_iso	DGRP317_grp	DGRP317_iso
13	4	8	5	13	3	9	15	16	16	12	13
12	8	16	3	14	8	17	13	13	15	13	14
10	5	13	3	14	8	13	12	15	12	15	10
8	9	12	12	12	6	13	12	12	10	16	7
9	4	11	6	10	5	18	16	16	10	15	8
15	6	10	5	9	4	16	15	16	16	16	9
12	6	10	5	9	6	18	9	18	13	17	18
13	3	11	7	6	7	16	9	17	13	16	15
12	11	15	8	13	11	18	10	19	9	18	16
15	6	14	4	13	8	17	10	15	5	19	13
11	6	3	6	12	6	15	12	17	9	13	14
12	5	9	8	12	9	17	13	15	11	18	14

## Sheet: Figure 3D_Raw data
Figure 3D
food intake per larvae
DGRP73_grp	DGRP73_iso	DGRP563_grp	DGRP563_iso	DGRP370_grp	DGRP370_iso	DGRP360_grp	DGRP360_iso	DGRP707_grp	DGRP707_iso	DGRP317_grp	DGRP317_iso
0.2219	0.0828	0.1807	0.0554	0.2921	0.0882	0.3884	0.2152	0.3251	0.1125	0.3952	0.1055
0.1882	0.0568	0.1666	0.0378	0.2377	0.0708	0.3571	0.1559	0.3392	0.1378	0.3211	0.1854
0.1705	0.1186	0.1729	0.0658	0.2644	0.0923	0.3095	0.1443	0.2488	0.1442	0.2588	0.2011
0.2081	0.0953	0.2513	0.1221	0.2084	0.0577	0.3377	0.3139	0.281	0.0909	0.2675	0.1736
0.1128	0.0992	0.3056	0.0832	0.2315	0.0689	0.4001	0.3552	0.2607	0.1207	0.3641	0.1338
0.3024	0.1037	0.1229	0.0775	0.199	0.0782	0.3085	0.2315	0.2399	0.2227	0.3052	0.1075
0.2553	0.0867	0.2447	0.0608	0.1924	0.0812	0.3619	0.1052	0.2704	0.0589	0.2177	0.0992
0.2307	0.1233	0.2523	0.1008	0.2139	0.0779	0.3332	0.1206	0.2509	0.1059	0.2931	0.1442
0.1954	0.1339	0.2607	0.0926	0.1596	0.0992	0.4211	0.2247	0.3408	0.1137	0.3254	0.1428
0.3006	0.095	0.2718	0.0877	0.2647	0.1083	0.358	0.2902	0.3112	0.2057	0.199	0.1572
0.2278	0.0921	0.2816	0.0752	0.2108	0.0606	0.3628	0.2551	0.2517	0.2448	0.2803	0.2081
0.2626	0.1001	0.1324	0.0803	0.2096	0.0873	0.3198	0.1856	0.1808	0.1622	0.3002	0.1706

## Sheet: Figure 3E_Raw data
Figure 3E
developmental time
DGRP73_grp	DGRP73_iso	DGRP563_grp	DGRP563_iso	DGRP370_grp	DGRP370_iso	DGRP360_grp	DGRP360_iso	DGRP707_grp	DGRP707_iso	DGRP317_grp	DGRP317_iso
10	13	9	13	9	11	8	10	10	8	9	9
10	11	9	12	10	13	8	11	9	9	9	10
9	10	10	12	10	11	9	10	9	9	9	10
9	11	11	13	10	12	9	9	8	10	10	10
10	12	11	13	10	13	11	9	10	10	10	9
9	13	10	12	11	12	10	8	11	11	10	9
10	12	10	12	11	11	8	8	10	10	9	8
11	13	10	11	10	11	8	9	8	9	9	9

## Sheet: Figure 3F_Raw data
Figure 3F
% eclosed flies
DGRP73_grp	DGRP73_iso	DGRP563_grp	DGRP563_iso	DGRP370_grp	DGRP370_iso	DGRP360_grp	DGRP360_iso	DGRP707_grp	DGRP707_iso	DGRP317_grp	DGRP317_iso
0.78	0.530864	0.72	0.45679	0.74	0.592593	0.78	0.62963	0.7	0.555556	0.72	0.592593
0.72	0.592593	0.73	0.555556	0.82	0.62963	0.73	0.592593	0.75	0.617284	0.73	0.604938
0.79	0.518518	0.75	0.518518	0.78	0.54321	0.73	0.604938	0.74	0.580247	0.75	0.641975
0.75	0.555556	0.75	0.617284	0.74	0.530864	0.69	0.62963	0.73	0.518518	0.76	0.617284
0.61	0.493827	0.77	0.716049	0.73	0.604938	0.68	0.518518	0.8	0.567901	0.69	0.62963
0.73	0.567901	0.69	0.530864	0.72	0.567901	0.75	0.567901	0.65	0.617284	0.69	0.580247
0.7	0.580247	0.65	0.518518	0.66	0.530864	0.78	0.567901	0.72	0.654321	0.78	0.592593
0.65	0.530864	0.7	0.469136	0.68	0.54321	0.72	0.580247	0.76	0.580247	0.7	0.617284

## Sheet: Figure 3G_Raw data
Figure 3G
% male progeny
DGRP73_grp	DGRP73_iso	DGRP563_grp	DGRP563_iso	DGRP370_grp	DGRP370_iso	DGRP360_grp	DGRP360_iso	DGRP707_grp	DGRP707_iso	DGRP317_grp	DGRP317_iso
0.474359	0.325581	0.444444	0.324324	0.445946	0.354167	0.474359	0.45098	0.457143	0.488889	0.486111	0.479167
0.416667	0.333333	0.452055	0.311111	0.45122	0.392157	0.452055	0.458333	0.453333	0.52	0.506849	0.469388
0.455696	0.285714	0.48	0.309524	0.474359	0.295455	0.465753	0.469388	0.445946	0.446809	0.493333	0.5
0.44	0.355556	0.506667	0.32	0.486486	0.348837	0.478261	0.45098	0.506849	0.452381	0.513158	0.44
0.442623	0.4	0.415584	0.327586	0.547945	0.326531	0.573529	0.47619	0.4875	0.478261	0.507246	0.45098
0.465753	0.304348	0.449275	0.325581	0.513889	0.304348	0.533333	0.478261	0.476923	0.48	0.434783	0.489362
0.514286	0.361702	0.476923	0.285714	0.530303	0.255814	0.512821	0.478261	0.472222	0.45283	0.448718	0.520833
0.430769	0.372093	0.471429	0.368421	0.485294	0.363636	0.5	0.531915	0.473684	0.468085	0.471429	0.48

## Sheet: Figure 3_Statistics
Figure 3C	normality test (Shapiro-Wilk test)		Passed normality test?
larval digging depth	short SD (grp)	p = 0.0591	Yes
n = 36	short SD (iso)	*p = 0.0361	No
(n = 12 per line)	long SD (grp)	*p = 0.0169	No
	long SD (iso)	p = 0.4471	Yes
	equal variance test (Brown-Forsythe test)	p = 0.1827	Are SDs significantly different?
			No
	ART 2-way ANOVA
	SD effects	****p < 0.0001
	grp/iso effects	****p < 0.0001
	SD x grp/iso interaction effects	*p = 0.0338
	Wilcoxon rank sum test
	short SD (grp) vs. long SD (grp)	****p < 0.0001
	short SD (iso) vs. long SD (iso)	****p < 0.0001
	short SD (grp) vs. short SD (iso)	****p < 0.0001
	long SD (grp) vs. long SD (iso)	****p < 0.0001
Figure 3D	normality test (Shapiro-Wilk test)		Passed normality test?
food intake per larvae	short SD (grp)	p = 0.6015	Yes
n = 36	short SD (iso)	p = 0.9498	Yes
(n = 12 per line)	long SD (grp)	p = 0.9613	Yes
	long SD (iso)	p = 0.0668	Yes
	equal variance test (Brown-Forsythe test)	****p < 0.0001	Are SDs significantly different?
			Yes
	ART 2-way ANOVA
	SD effects	****p < 0.0001
	grp/iso effects	****p < 0.0001
	SD x grp/iso interaction effects	p = 0.6211
	Wilcoxon rank sum test
	short SD (grp) vs. long SD (grp)	****p < 0.0001
	short SD (iso) vs. long SD (iso)	****p < 0.0001
	short SD (grp) vs. short SD (iso)	****p < 0.0001
	long SD (grp) vs. long SD (iso)	****p < 0.0001
Figure 3E	normality test (Shapiro-Wilk test)		Passed normality test?
developmental time	short SD (grp)	***p = 0.0004	No
n = 24	short SD (iso)	**p = 0.0024	No
(n = 8 per line)	long SD (grp)	**p = 0.0073	No
	long SD (iso)	**p = 0.0085	No
	equal variance test (Brown-Forsythe test)	p = 0.3905	Are SDs significantly different?
			No
	ART 2-way ANOVA
	SD effects	****p < 0.0001
	grp/iso effects	****p < 0.0001
	SD x grp/iso interaction effects	****p < 0.0001
	Wilcoxon rank sum test
	short SD (grp) vs. long SD (grp)	*p = 0.0273
	short SD (iso) vs. long SD (iso)	****p < 0.0001
	short SD (grp) vs. short SD (iso)	****p < 0.0001
	long SD (grp) vs. long SD (iso)	p = 1
Figure 3F	normality test (Shapiro-Wilk test)		Passed normality test?
% eclosed adults	short SD (grp)	p = 0.8836	Yes
n = 24	short SD (iso)	p = 0.1545	Yes
(n = 8 per line)	long SD (grp)	p = 0.8598	Yes
	long SD (iso)	p = 0.3403	Yes
	equal variance test (Brown-Forsythe test)	p = 0.3755	Are SDs significantly different?
			No
	2-way ANOVA
	SD effects	*p = 0.0116
	grp/iso effects	****p < 0.0001
	SD x grp/iso interaction effects	p = 0.0749
	Tukey's multiple comparisons test
	short SD (grp) vs. long SD (grp)	p = 0.9473
	short SD (iso) vs. long SD (iso)	*p = 0.0137
	short SD (grp) vs. short SD (iso)	****p < 0.0001
	long SD (grp) vs. long SD (iso)	****p < 0.0001
Figure 3G	normality test (Shapiro-Wilk test)		Passed normality test?
% male progeny	short SD (grp)	p = 0.4153	Yes
n = 24	short SD (iso)	p = 0.4682	Yes
(n = 8 per line)	long SD (grp)	*p = 0.0205	No
	long SD (iso)	p = 0.1003	Yes
	equal variance test (Brown-Forsythe test)	p = 0.3283	Are SDs significantly different?
			No
	ART 2-way ANOVA
	SD effects	****p < 0.0001
	grp/iso effects	****p < 0.0001
	SD x grp/iso interaction effects	****p < 0.0001
	Wilcoxon rank sum test
	short SD (grp) vs. long SD (grp)	p = 1
	short SD (iso) vs. long SD (iso)	****p < 0.0001
	short SD (grp) vs. short SD (iso)	****p < 0.0001
	long SD (grp) vs. long SD (iso)	p = 1
