# Supplementary material for: Drosulfakinin signaling encodes early-life memory for adaptive social plasticity
Source: eLife. 2024 Dec 18;13:e103973. doi: 10.7554/eLife.103973 (PMC11706606; doi:10.7554/eLife.103973)
Supplement: Figure 4—source data 1. [file elife-103973-fig4-data1.xlsx]

## Sheet: Figure 4B_Raw data
Figure 4B
training session	DGRP73_grp_1st	DGRP73_grp_3rd	DGRP73_iso_1st	DGRP73_iso_3rd	DGRP360_grp_1st	DGRP360_grp_3rd	DGRP360_iso_1st	DGRP360_iso_3rd
	42	19	48	20	28	15	25	20
	33	17	56	23	18	16	27	19
	51	24	47	19	36	18	21	16
	39	25	38	30	22	20	31	18
	43	21	52	28	17	21	29	11
	58	22	53	31	25	12	15	18
	48	31	50	26	27	14	17	10
	44	15	41	25	38	16	20	16
	50	18	49	23	29	25	23	13
	53	26	34	31	31	11	21	10
	35	22			22	10
	48	31			28	25
	38	15			27	11
	45	22			29	13
	50	37			37	18
	41	29			24	9
maze test	DGRP73_grp		DGRP73_iso		DGRP360_grp		DGRP360_iso
	16 naïve	4 pioneer + 12 naïve	16 naïve	4 pioneer + 12 naïve	16 naïve	4 pioneer + 12 naïve	16 naïve	4 pioneer + 12 naïve
	58	22	43	51	19	16	15	33
	53	23	58	48	22	12	25	13
	54	35	62	39	26	15	10	19
	39	37	51	46	17	20	9	14
	48	19	49	59	15	21	15	11
	45	38	49	50	25	10	16	9
	43	42			31	15
	31	24			18	8
	51	28			25	16
	56	30			32	13

## Sheet: Figure 4D_Raw data
Figure 4D
SD
DGRP73_grp_ctrl	DGRP73_grp_inj	DGRP73_grp_rec	DGRP73_iso_ctrl	DGRP73_iso_inj	DGRP73_iso_rec	DGRP73_GTI_ctrl	DGRP73_GTI_inj	DGRP73_GTI_rec	DGRP73_ITG_ctrl	DGRP73_ITG_inj	DGRP73_ITG_rec
13.981	10.5827	24.7947	30.7796	25.3195	31.0013	20.4323	21.5912	25.2669	22.9288	25.0995	24.7208
18.1753	13.387	17.5728	27.9387	23.8125	25.7826	27.1408	22.3337	26.0389	20.8027	24.9165	22.684
22.4528	13.2615	18.4876	32.4273	19.202	30.35	28.0473	21.7364	23.7961	25.9433	21.6517	23.3784
11.8765	14.2288	17.6847	24.4507	28.6527	29.0974	22.0808	22.7617	24.2655	23.4776	24.8806	23.4607
21.6263	14.4594	24.8907	31.8341	29.8995	23.7551	22.756	23.138	25.4351	23.9196	23.8334	24.5694
25.2532	16.2254	23.9179	28.0945	32.508	31.2845	27.9739	23.4175	28.1068	23.4572	25.2338	23.9893
24.449	15.2585	21.1198	30.595	26.0649	28.3292	27.3227	19.0869	28.2052	26.1535	22.7556	23.9705
22.3529	15.3603	17.8564	26.255	26.2089	25.3543	31.1742	23.7025	28.7741	24.4274	25.3259	25.1096
DGRP360_grp_ctrl	DGRP360_grp_inj	DGRP360_grp_rec	DGRP360_iso_ctrl	DGRP360_iso_inj	DGRP360_iso_rec	DGRP360_GTI_ctrl	DGRP360_GTI_inj	DGRP360_GTI_rec	DGRP360_ITG_ctrl	DGRP360_ITG_inj	DGRP360_ITG_rec
36.7794	22.5729	32.0415	30.7898	32.1064	31.1662	37.2325	32.3702	34.4807	32.1583	32.2029	33.0625
34.1651	23.5477	31.7916	27.1852	33.0956	34.5846	34.9575	37.0061	35.7716	32.8272	32.7317	33.17
32.2683	25.9765	35.0192	32.4681	33.6187	33.065	32.7686	33.662	35.6829	30.5948	34.6244	33.6625
32.0849	25.6549	31.9149	32.5872	30.6648	32.6699	35.4571	31.33	38.6459	31.1759	32.2548	34.1473
33.1104	28.8867	31.9294	30.8301	28.8335	36.0139	36.3138	30.7187	36.674	31.2132	34.3465	35.5515
32.3948	22.1438	30.7227	32.263	31.5847	27.8957	36.9966	31.9917	34.9486	30.3759	34.0086	24.7908
35.0369	23.2689	33.3609	29.9569	32.6123	29.9746	36.156	30.975	37.8692	32.5221	35.2825	28.1216
34.8926	25.5358	33.8562	30.9178	32.8777	31.1115	34.7248	30.5403	35.515	32.8976	33.9924	22.998

## Sheet: Figure 4_Statistics
Figure 4B
training session	DGRP73	2-way RM ANOVA
	(n grp = 16)	training session effects	****p < 0.0001
	(n iso = 10)	grp/iso effects	p = 0.2905
		training x grp/Iso interaction effects	p = 0.9283
		Sidak's multiple comparisons test
		1st training (grp) vs. 3rd training (grp)	****p < 0.0001
		1st training (iso) vs. 3rd training (iso)	****p < 0.0001
maze test	DGRP73	ordinary 2-way ANOVA
	(n grp = 10)	pioneer effects	***p = 0.0008
	(n iso = 6)	grp/iso effects	***p = 0.0003
		pioneer x grp/Iso interaction effects	*p = 0.0131
		Tukey's multiple comparisons test
		naive (grp) vs. naive +pioneer (grp)	****p < 0.0001
		naive (grp) vs. naive (iso)	p = 0.7153
		naive (iso) vs. naive +pioneer (iso)	p = 0.8900
training session	DGRP360	2-way RM ANOVA
	(n grp = 16)	training session effects	****p < 0.0001
	(n iso = 10)	grp/iso effects	p = 0.1060
		training x grp/Iso interaction effects	p = 0.2036
		Sidak's multiple comparisons test
		1st training (Grp) vs. 3rd training (Grp)	***p < 0.0001
		1st training (Iso) vs. 3rd training (Iso)	**p = 0.0036
maze test	DGRP360	ordinary 2-way ANOVA
	(n grp = 10)	pioneer effects	p = 0.1247
	(n iso = 6)	grp/iso effects	p = 0.1727
		pioneer x grp/Iso interaction effects	*p = 0.0310
		Tukey's multiple comparisons test
		naive (grp) vs. naive +pioneer (grp)	*p = 0.0192
		naive (grp) vs. naive (iso)	p = 0.0670
		naive (iso) vs. naive +pioneer (iso)	p = 0.9719
Figure 4D	DGRP73	1-way ANOVA, Tukey's multiple comparisons test
SD	grp	ctrl vs inj	**p = 0.0084
(n = 8)		ctrl vs rec	p = 0.9021
		inj vs rec	**p = 0.0031
	iso	ctrl vs inj	p = 0.2776
		ctrl vs rec	p = 0.8400
		inj vs rec	p = 0.5781
	GTI	ctrl vs inj	*p = 0.0237
		ctrl vs rec	p = 0.9543
		inj vs rec	*p = 0.0124
	ITG	ctrl vs inj	p = 0.8804
		ctrl vs rec	p = 0.9886
		inj vs rec	p = 0.9391
	DGRP360	1-way ANOVA, Tukey's multiple comparisons test
	grp	ctrl vs inj	****p < 0.0001
		ctrl vs rec	p = 0.3580
		inj vs rec	****p < 0.0001
	iso	ctrl vs inj	p = 0.5607
		ctrl vs rec	p = 0.4808
		inj vs rec	p = 0.9901
	GTI	ctrl vs inj	**p = 0.0029
		ctrl vs rec	p = 0.7500
		inj vs rec	***p = 0.0005
	ITG	ctrl vs inj	p = 0.3764
		ctrl vs rec	p = 0.7549
		inj vs rec	p = 0.1173

## Sheet: Figure 4 - Supplement 1_data
Figure 4 - Supplement 1
training session	DGRP563_grp_1st	DGRP563_grp_3rd	DGRP563_iso_1st	DGRP563_iso_3rd	DGRP370_grp_1st	DGRP370_grp_3rd	DGRP370_iso_1st	DGRP370_iso_3rd	DGRP707_grp_1st	DGRP707_grp_3rd	DGRP707_iso_1st	DGRP707_iso_3rd	DGRP317_grp_1st	DGRP317_grp_3rd	DGRP317_iso_1st	DGRP317_iso_3rd
	54	31	52	29	48	38	44	28	34	14	35	13	43	15	29	14
	63	18	60	23	53	22	39	24	38	24	39	15	22	26	36	19
	51	29	55	25	44	12	62	31	41	16	28	22	28	10	27	10
	66	25	58	28	48	13	52	20	28	20	27	14	31	16	26	18
	48	35	54	18	39	16	53	39	25	11	41	19	30	20	33	25
	62	41	44	19	58	22	46	23	22	13	28	10	25	11	28	13
	48	30			62	40			35	22			13	9
	55	25			47	15			23	14			29	9
	50	19			39	16			19	13			33	22
	39	24			55	23			28	11			18	10
	41	20			24	25			31	20			24	20
	53	22			42	18			30	10			20	12
maze tssay	DGRP563_grp		DGRP563_iso		DGRP370_grp		DGRP370_iso		DGRP707_grp		DGRP707_iso		DGRP317_grp		DGRP317_iso
	16 naïve	4 pioneer + 12 naïve	16 naïve	4 pioneer + 12 naïve	16 naïve	4 pioneer + 12 naïve	16 naïve	4 pioneer + 12 naïve	16 naïve	4 pioneer + 12 naïve	16 naïve	4 pioneer + 12 naïve	16 naïve	4 pioneer + 12 naïve	16 naïve	4 pioneer + 12 naïve
	59	28	50	39	48	23	38	27	38	13	12	10	28	13	20	15
	49	20	42	48	49	18	40	45	28	24	17	13	25	14	18	10
	65	41	55	67	62	30	57	57	25	9	16	18	13	8	25	29
	61	25	48	55	68	12	62	50	20	8	20	9	23	6	31	18
	38	18	61	28	54	35	55	48	26	11	15	15	18	10	24	25
	52	38	35	53	56	27	49	51	18	16	11	10	19	12	16	23

## Sheet: Figure 4 - Supplement 2A_data
Figure 4 - Supplement 2A
training session	CS_grp_1st	CS_grp_3rd	rut1_grp_1st	rut1_grp_3rd	CS_grp_1st	CS_grp_3rd	rut2080_grp_1st	rut2080_grp_3rd
	33	18	38	40	25	17	43	45
	17	25	56	48	31	18	61	31
	35	13	45	58	41	13	51	55
	42	21	31	39	32	19	30	41
	25	18	29	33	36	15	37	47
	23	13	35	39	41	28	42	55
	24	20	42	20	33	18	47	51
	30	16	50	47	40	23	33	44
	29	11	33	51

## Sheet: Figure 4 - Supplement 2B_data
Figure 4 - Supplement 2B
SD	CS_ctrl	CS_inj	rut1_ctrl	rut1_inj	CS_ctrl	CS_inj	rut2080_ctrl	rut2080_inj
	21.2486	25.5858	29.4415	26.0968	23.7486	19.9373	31.9778	25.052
	26.3105	20.741	25.8116	23.5822	25.357	21.3489	32.6751	24.8067
	26.5053	18.3772	32.834	24.6397	24.9583	22.2335	28.5584	23.7237
	23.7567	18.4279	21.074	24.3874	26.9547	17.1515	23.1534	26.6358
	24.4865	17.1721	31.1444	19.3519	24.5099	22.9028	27.5246	24.5703
	23.5924	25.0567	28.8838	17.1925	23.9052	20.6637	30.9174	17.8816
	26.5324	19.8144	27.9413	17.4713	24.3865	25.4864	24.3111	24.8292
	27.5756	16.5021	21.9991	19.7298	21.9825	18.8422	25.075	27.7945
					24.6157	21.3908	28.6524	23.4264
					23.1321	18.1886	25.165	24.2244

## Sheet: Figure 4 - Supplement 3A_data
Figure 4 - Supplement 3A
DGRP563_grp_ctrl	DGRP563_grp_inj	DGRP563_grp_rec	DGRP563_iso_ctrl	DGRP563_iso_inj	DGRP563_iso_rec	DGRP563_GTI_ctrl	DGRP563_GTI_inj	DGRP563_GTI_rec	DGRP563_ITG_ctrl	DGRP563_ITG_inj	DGRP563_ITG_rec
24.7947	15.4672	23.3682	30.8105	26.785	26.9179	29.0231	24.5952	27.3623	21.4867	22.8586	20.9146
17.5728	12.6649	20.6952	20.6041	24.8839	23.5922	27.6505	19.915	26.8672	23.6683	29.5483	24.678
18.4876	19.808	23.8286	27.1294	24.6733	23.1284	26.4837	21.8957	22.1635	28.7859	24.7354	21.8672
17.6847	14.8034	22.3279	24.0261	27.5139	25.5614	28.3512	24.7069	25.4413	23.6635	24.7599	26.5173
24.8907	21.569	24.73	27.6638	27.299	24.1501	23.5907	23.1469	32.9207	23.1387	25.1256	19.8454
25.3714	14.7607	21.7367	25.9216	23.3067	28.1481	29.62	22.2566	34.1909	22.1245	24.1177	19.5869
18.0191	16.7854	29.9573	28.7104	26.9722	28.2588	26.6874	24.1242	28.3737	18.2764	22.809	22.125
21.9516	14.2725	21.7733	25.2352	29.3925	27.8347	23.7365	24.1429	27.1798	24.9599	15.3158	28.4723
DGRP370_grp_ctrl	DGRP370_grp_inj	DGRP370_grp_rec	DGRP370_iso_ctrl	DGRP370_iso_inj	DGRP370_iso_rec	DGRP370_GTI_ctrl	DGRP370_GTI_inj	DGRP370_GTI_rec	DGRP370_ITG_ctrl	DGRP370_ITG_inj	DGRP370_ITG_rec
24.8011	13.7404	22.0585	31.6895	33.8008	27.8259	25.0592	20.9087	28.4238	17.8049	28.479	23.7143
20.626	17.8987	29.5838	29.1393	28.5678	23.5864	25.6931	25.1193	26.3283	24.4876	22.3469	23.4516
24.28	12.7119	24.6856	24.2386	23.7028	23.1549	31.5939	19.7893	29.2544	20.4992	24.1351	25.7769
23.2779	15.4862	26.2617	32.2917	27.5893	28.9642	28.8072	21.5552	30.162	16.4001	26.9465	21.8083
19.0041	15.8131	21.1667	20.6328	23.6566	30.5826	23.2792	28.2001	26.2531	21.3319	19.4858	24.2002
19.8411	18.2821	20.594	22.2732	26.8023	32.7551	28.5948	22.1183	22.8109	23.6581	26.062	22.9578
19.6612	15.5754	17.9428	29.3789	25.619	24.974	25.8727	23.8364	29.2361	23.2406	20.819	21.13
20.0119	20.1088	20.2311	23.8357	31.3613	23.5711	29.378	24.9826	28.0561	22.6751	22.46	24.4169
DGRP707_grp_ctrl	DGRP707_grp_inj	DGRP707_grp_rec	DGRP707_iso_ctrl	DGRP707_iso_inj	DGRP707_iso_rec	DGRP707_GTI_ctrl	DGRP707_GTI_inj	DGRP707_GTI_rec	DGRP707_ITG_ctrl	DGRP707_ITG_inj	DGRP707_ITG_rec
31.1662	19.8438	30.4538	32.8141	26.5279	37.5936	38.5244	33.4751	35.8742	34.3398	33.0967	35.7338
34.5846	21.6225	33.5167	36.4583	32.0066	30.5707	38.5252	33.0587	33.2141	36.1086	27.6522	39.4554
33.065	19.9842	31.7401	29.5246	34.0761	31.4929	36.7091	30.6342	31.0309	32.0964	36.9753	28.4458
32.6699	25.5113	33.8622	32.2764	31.6118	28.1616	38.0981	33.4773	33.7508	32.4118	34.7672	34.916
36.0139	19.8803	32.9704	35.2339	31.2758	29.8617	39.5023	39.7589	39.1293	38.0061	26.7445	27.7691
33.0835	21.5938	30.1969	34.2307	31.2909	37.0702	31.2263	28.0811	31.1947	32.9234	36.8415	34.8777
26.1256	27.0756	31.9185	31.7079	36.0256	31.2098	37.5034	30.4718	31.7687	36.858	36.7148	27.4591
30.6575	18.5664	32.2169	38.9487	32.3172	34.2547	35.5495	29.1227	37.9774	31.707	27.7533	30.1691
DGRP317_grp_ctrl	DGRP317_grp_inj	DGRP317_grp_rec	DGRP317_iso_ctrl	DGRP317_iso_inj	DGRP317_iso_rec	DGRP317_GTI_ctrl	DGRP317_GTI_inj	DGRP317_GTI_rec	DGRP317_ITG_ctrl	DGRP317_ITG_inj	DGRP317_ITG_rec
31.8181	22.158	29.5702	30.9888	31.7728	29.5002	38.4435	31.5032	34.1381	28.9334	31.9499	30.8914
32.0648	21.6225	34.4329	30.9766	31.9785	32.2061	35.052	28.9072	35.3676	35.8448	33.7062	32.3147
34.785	19.9842	29.3566	32.2743	35.0751	29.0135	38.8674	35.6318	35.567	37.6999	28.7286	18.2189
30.8015	25.0393	33.2374	32.7247	34.302	31.4666	29.2984	33.2687	33.3845	35.0434	35.6379	32.724
30.6726	22.2241	33.7237	33.7483	34.0608	30.2063	35.1992	33.2565	38.0742	34.0151	26.7486	36.9674
33.9798	21.649	33.6144	29.4592	39.9115	35.3386	33.7467	28.5343	37.8453	30.4023	29.4599	23.3746
34.1047	27.4136	33.084	20.8523	24.5899	35.8758	32.3091	34.6218	34.3305	32.796	35.1654	30.9744
33.9194	25.3052	27.9988	23.7595	20.4154	35.2259	39.2121	28.3844	37.5641	27.8647	35.5165	31.6639

## Sheet: Figure 4 - Supplement 3B_data
Figure 4 - Supplement 3B
DGRP73_female				DGRP563_female				DGRP370_female
grp_ctrl	grp_inj	grp_rec		grp_ctrl	grp_inj	grp_rec		grp_ctrl	grp_inj	grp_rec
16.3982	24.2281	23.6411		31.9207	19.2725	22.0506		18.807	15.1745	22.9032
24.0425	22.7897	19.3895		21.7543	22.4603	30.6497		22.0021	24.8058	28.0079
21.9224	22.217	21.4946		18.022	12.8842	22.0429		23.9748	16.0359	19.1949
21.1433	18.7969	16.6631		18.5124	21.2901	22.2529		23.4984	26.0798	20.9069
24.6432	19.5266	23.7082		20.2442	27.6734	23.1113		25.7887	22.7803	14.712
22.3721	22.2051	22.6314		24.5475	30.107	20.9892		20.282	20.848	16.8233
23.9508	22.3004	22.27		21.0706	27.6141	26.6418		23.9093	21.8571	15.6263
22.4495	23.1612	23.1485		19.8001	23.9636	20.1261		24.9858	21.0556	19.0991
DGRP360_female				DGRP707_female				DGRP317_female
grp_ctrl	grp_inj	grp_rec		grp_ctrl	grp_inj	grp_rec		grp_ctrl	grp_inj	grp_rec
28.8028	23.0037	28.2717		34.6762	27.5175	31.7536		30.4009	23.674	34.0667
28.8963	33.9444	22.6136		37.1533	32.684	33.3363		28.6713	36.7223	28.7057
29.3635	37.6932	30.5401		31.8078	34.7876	29.3774		30.2242	29.785	33.7221
27.9207	36.2149	35.1185		31.188	32.2959	28.9141		36.4003	37.4412	28.983
25.0992	28.3275	33.3977		26.7615	31.766	26.0316		30.5743	37.2868	25.2911
28.0157	23.2128	30.0461		27.6914	28.2356	30.0785		36.6875	31.2692	27.5222
25.4703	30.1524	31.0703		24.9349	32.825	29.3362		23.5119	37.991	21.4058
31.4603	26.321	31.3073		32.3628	34.1221	31.3895		21.8525	26.3532	35.5286

## Sheet: Figure 4 - Supplement 4_data
Figure 4 - Supplement 4
DGRP73_average walking speed							DGRP563_average walking speed							DGRP370_average walking speed							DGRP360_average walking speed							DGRP707_average walking speed							DGRP317_average walking speed
grp_ctrl	grp_inj	grp_rec	iso_ctrl	iso_inj	iso_rec		grp_ctrl	grp_inj	grp_rec	iso_ctrl	iso_inj	iso_rec		grp_ctrl	grp_inj	grp_rec	iso_ctrl	iso_inj	iso_rec		grp_ctrl	grp_inj	grp_rec	iso_ctrl	iso_inj	iso_rec		grp_ctrl	grp_inj	grp_rec	iso_ctrl	iso_inj	iso_rec		grp_ctrl	grp_inj	grp_rec	iso_ctrl	iso_inj	iso_rec
0.2355	0.2244	0.1173	1.5738	1.3653	1.0125		0.3528	0.075	0.4128	0.5319	2.3313	1.2636		0.2502	0.2001	0.7617	0.5976	0.2379	0.7248		1.515	0.3639	1.6047	1.7715	2.0733	2.3004		1.6983	0.2094	2.4189	2.8923	2.3628	2.4732		2.6715	0.3174	2.7123	2.031	2.7897	1.1583
0.2943	0.2631	0.3528	0.7977	0.369	0.9087		0.3384	0.1287	1.4832	1.6656	0.7404	1.6038		0.1929	0.2337	0.7428	0.342	0.3897	0.5013		2.4981	1.092	2.2008	1.2996	2.7318	1.968		2.9076	0.2001	0.1359	2.9436	2.544	2.8431		2.0316	0.2001	2.5575	1.4127	1.809	2.3163
0.6588	0.2745	0.3384	0.2748	0.6714	0.8553		0.3339	0.4374	0.363	0.5922	1.6233	0.8019		0.2823	0.111	0.4728	0.6492	0.3381	0.2925		2.3523	0.1731	0.8802	2.5497	1.2807	2.5827		3.0654	0.1818	2.7924	1.9248	1.6743	2.0145		1.9305	0.1818	2.3346	1.7619	2.622	1.2297
0.2046	0.2268	0.3339	0.3252	0.3582	1.413		0.2766	0.0663	0.1086	1.9233	0.4863	1.4856		0.2658	0.1668	0.2052	0.4461	0.7269	0.4236		1.7751	0.1869	2.8185	2.1381	1.5855	2.2992		2.0004	0.243	1.7256	2.2512	2.3745	2.7768		2.0418	0.1353	1.743	3.1026	2.8821	1.0797
0.1815	0.4851	0.2766	0.4953	1.4547	0.7791		0.348	0.1713	0.1275	0.6963	1.6944	0.8832		0.2256	0.1557	0.1794	0.1311	0.3864	0.2562		3.5013	0.3198	1.8396	2.3409	2.2227	2.5293		1.8717	0.2076	2.3904	2.1105	2.736	2.5122		2.3418	0.144	3.6762	3.2277	2.2098	1.146
0.2355	0.4443	0.348	1.542	1.4697	0.6342		0.2337	0.354	0.192	1.3536	0.5328	0.885		0.2154	0.2211	0.1761	0.3069	0.4125	0.2457		2.7807	0.1575	1.4052	1.9023	2.007	2.706		1.7001	0.2685	2.1258	2.4606	1.8867	2.5512		1.7382	0.1746	2.2233	2.2872	1.5668	1.1985
0.7041	0.192	0.4011	0.8334	0.9252	0.7392		0.111	0.411	0.0822	1.3908	1.7532	0.4407		0.1728	0.2646	0.1683	0.1956	0.5568	0.2274		1.7388	0.108	2.8491	1.9866	3.4149	2.0949		1.7673	0.1602	1.9572	2.0028	2.1996	2.9148		3.282	1.7913	2.2941	1.4456	1.7409	1.2864
0.1779	0.1755	0.5076	0.5994	0.9168	0.5628		0.1668	1.1199	0.1353	0.4692	1.2348	0.2469		0.2664	0.375	0.2112	0.1959	1.3383	0.2241		1.9707	0.4239	2.4189	1.3464	1.9494	1.3749		2.0847	0.1548	2.5167	1.8261	2.8284	1.4655		1.8669	2.3796	2.8854	2.0024	2.421	2.3712
DGRP73_Q4 walking speed							DGRP563_Q4 walking speed							DGRP370_Q4 walking speed							DGRP360_Q4 walking speed							DGRP707_Q4 walking speed							DGRP317_Q4 walking speed
grp_ctrl	grp_inj	grp_rec	iso_ctrl	iso_inj	iso_rec		grp_ctrl	grp_inj	grp_rec	iso_ctrl	iso_inj	iso_rec		grp_ctrl	grp_inj	grp_rec	iso_ctrl	iso_inj	iso_rec		grp_ctrl	grp_inj	grp_rec	iso_ctrl	iso_inj	iso_rec		grp_ctrl	grp_inj	grp_rec	iso_ctrl	iso_inj	iso_rec		grp_ctrl	grp_inj	grp_rec	iso_ctrl	iso_inj	iso_rec
0.1872	0.1218	0.1134	1.8714	1.5411	0.6648		0.279	0.0858	0.2589	0.2778	2.5569	1.0722		0.1998	0.1947	0.3099	0.3219	0.1167	0.9165		1.5306	0.2076	1.4811	1.782	1.701	2.2971		1.6113	0.1788	2.6301	2.181	1.8825	1.9533		1.8516	0.0963	1.7802	2.2425	2.0952	1.1667
0.2787	0.1401	0.279	0.861	0.2556	0.6273		0.225	0.1023	1.3167	1.6692	0.7062	1.6449		0.1551	0.1398	0.2247	0.219	0.1704	0.2634		2.2206	0.4323	1.5915	1.5798	2.7717	1.5732		2.8629	0.2295	0.12	2.565	2.0088	2.1756		1.4781	0.2295	2.0613	1.7766	1.4613	1.7934
0.1596	0.1947	0.225	0.2412	0.735	0.8325		0.1941	0.4107	0.2781	0.4062	1.3188	0.4158		0.249	0.1014	0.186	0.3576	0.1743	0.2508		1.929	0.1527	1.0116	3.1965	1.3275	2.2923		2.613	0.1278	2.2389	1.6944	1.1463	1.4658		1.9377	0.1278	1.6758	1.7016	2.4159	1.0713
0.1056	0.2301	0.1941	0.3009	0.1512	1.3533		0.2694	0.0591	0.1143	2.0313	0.4614	1.4748		0.3315	0.1446	0.1812	0.462	0.2247	0.2403		1.3545	0.1755	2.1804	2.022	1.5174	1.7865		1.851	0.1272	0.9462	2.0346	2.0292	2.2011		1.5906	0.1329	1.3392	3.3387	2.5422	0.6507
0.1476	0.2946	0.2694	0.4188	1.4703	0.7311		0.2904	0.1533	0.0861	0.5916	1.848	0.3525		0.1746	0.126	0.1515	0.0939	0.1353	0.1713		3.2064	0.2511	1.6824	2.5056	1.8531	2.2767		1.743	0.1365	1.6989	1.7184	2.2713	1.6917		1.992	0.1071	3.2418	3.2388	1.6434	1.0317
0.1872	0.2952	0.2904	1.1565	1.5009	0.9981		0.1398	0.1365	0.1749	1.2996	0.4728	0.8784		0.165	0.1512	0.1806	0.2577	0.1764	0.1371		2.3247	0.114	1.3215	2.0859	1.7952	2.1147		1.7211	0.1287	1.3905	2.4645	1.3899	2.0064		0.9396	0.0882	1.6371	1.8096	1.4402	1.0098
0.42	0.1602	0.2031	0.4953	0.6774	1.0161		0.1014	0.1857	0.0816	1.2039	1.8234	0.1689		0.1494	0.237	0.1473	0.1827	0.273	0.1203		1.7268	0.0963	2.7366	2.2788	3.1005	2.2731		2.1408	0.1059	1.5135	1.4841	1.686	2.2665		2.6802	1.6026	1.8027	1.1008	2.1012	1.1463
0.1386	0.153	0.378	0.2163	0.9093	0.6819		0.1446	0.585	0.1329	0.2826	1.5261	0.201		0.1833	0.2574	0.1791	0.1833	0.7911	0.147		2.1315	0.1395	2.5167	2.5797	2.1015	1.35		2.0859	0.1497	2.0817	1.4034	2.0193	1.3077		1.2327	2.0628	2.1462	1.4884	1.9632	2.0544
DGRP73_centroid velocity							DGRP563_centroid velocity							DGRP370_centroid velocity							DGRP360_centroid velocity							DGRP707_centroid velocity							DGRP317_centroid velocity
grp_ctrl	grp_inj	grp_rec	iso_ctrl	iso_inj	iso_rec		grp_ctrl	grp_inj	grp_rec	iso_ctrl	iso_inj	iso_rec		grp_ctrl	grp_inj	grp_rec	iso_ctrl	iso_inj	iso_rec		grp_ctrl	grp_inj	grp_rec	iso_ctrl	iso_inj	iso_rec		grp_ctrl	grp_inj	grp_rec	iso_ctrl	iso_inj	iso_rec		grp_ctrl	grp_inj	grp_rec	iso_ctrl	iso_inj	iso_rec
0.060382	0.034332	0.030748	0.505668	0.47709	0.222985		0.113589	0.038765	0.138785	0.165607	0.550469	0.338782		0.108719	0.093141	0.172177	0.119078	0.032607	0.34537		0.341754	0.094581	0.392561	0.494558	0.437459	0.663759		0.412841	0.075529	0.516958	0.496212	0.410133	0.425704		0.341754	0.094581	0.392561	0.494558	0.437459	0.663759
0.104336	0.042692	0.113589	0.340265	0.11438	0.174808		0.105806	0.026711	0.418853	0.463409	0.361555	0.475544		0.068293	0.05575	0.100282	0.086211	0.082031	0.186636		0.493543	0.284563	0.473106	0.471329	0.642286	0.476934		0.660795	0.09809	0.033321	0.494351	0.474508	0.487615		0.493543	0.284563	0.473106	0.471329	0.642286	0.476934
0.062558	0.071156	0.105806	0.068694	0.314212	0.281862		0.086111	0.114908	0.092882	0.18186	0.429857	0.254362		0.113178	0.025826	0.07715	0.15694	0.090567	0.151732		0.425549	0.067367	0.302297	0.715012	0.403858	0.527903		0.638497	0.038837	0.566586	0.369555	0.298259	0.374202		0.425549	0.067367	0.302297	0.715012	0.403858	0.527903
0.028709	0.094683	0.086111	0.144032	0.04503	0.556006		0.125202	0.015495	0.053506	0.539642	0.176148	0.450266		0.122689	0.061663	0.057691	0.17801	0.140329	0.160323		0.328741	0.082643	0.558172	0.52781	0.455925	0.386997		0.398613	0.033033	0.279716	0.383341	0.448257	0.409465		0.328741	0.082643	0.558172	0.52781	0.455925	0.386997
0.050607	0.090701	0.125202	0.147845	0.381471	0.254878		0.144378	0.074116	0.021647	0.301483	0.64328	0.215276		0.05053	0.040275	0.040606	0.0254	0.067389	0.090396		0.67208	0.086845	0.458257	0.636308	0.508023	0.463365		0.431435	0.037615	0.532008	0.427242	0.509033	0.442039		0.67208	0.086845	0.458257	0.636308	0.508023	0.463365
0.060382	0.147967	0.144378	0.42602	0.483164	0.390592		0.05575	0.047632	0.07353	0.406253	0.22617	0.462697		0.069119	0.049259	0.05615	0.078403	0.133906	0.057192		0.54857	0.029013	0.366544	0.641255	0.457259	0.525972		0.408985	0.037943	0.37788	0.480527	0.34952	0.418895		0.54857	0.029013	0.366544	0.641255	0.457259	0.525972
0.169258	0.067915	0.120896	0.210842	0.284755	0.300303		0.025826	0.068729	0.024322	0.438029	0.556051	0.078355		0.055324	0.076398	0.065914	0.053906	0.154541	0.066281		0.435006	0.029888	0.676763	0.624962	0.849405	0.610294		0.581721	0.030298	0.38214	0.348712	0.371808	0.515166		0.435006	0.029888	0.676763	0.624962	0.849405	0.610294
0.049246	0.043026	0.153105	0.080397	0.348779	0.21956		0.061663	0.276827	0.03878	0.139771	0.434514	0.067467		0.068711	0.099139	0.06043	0.066181	0.341257	0.06467		0.414417	0.054328	0.60035	0.661555	0.760755	0.453507		0.491736	0.042187	0.432863	0.365092	0.51546	0.315326		0.414417	0.054328	0.60035	0.661555	0.760755	0.453507

## Sheet: Figure 4 - Supplement 5_data
Figure 4 - Supplement 5
CS_ctrl	CS_inj	norpA[7]_ctrl	norpA[7]_inj	Orco[1]_ctrl	Orco[1]_inj	iav[1]_ctrl	iav[1]_inj	Poxn[68]_ctrl	Poxn[68]_inj
23.8033	17.4622	28.512	27.1618	28.3225	22.7337	24.5664	22.6377	22.4739	19.9469
22.0643	20.294	24.0429	20.8176	25.3841	21.3659	25.5887	21.5253	22.5636	20.8387
21.0609	18.686	26.3409	30.5807	22.7108	19.2893	27.098	24.4772	21.0285	17.7051
26.0278	21.4637	28.2227	25.7989	20.1188	18.1582	24.6798	20.9698	20.7167	20.6575
25.3145	17.3713	30.1251	28.9648	24.3401	21.0999	29.0379	19.3814	23.6145	21.5489
25.7723	20.1179	25.5038	24.1863	25.1528	20.9476	27.6331	21.1774	26.1039	22.5467
24.2754	19.4704	31.9849	29.9678	26.3709	21.14	27.5124	21.0801	23.0529	17.2072
22.1834	18.1821	32.761	30.3118	25.6785	23.0899	27.8132	22.7308	19.8757	20.1343

[truncated: 5 more sheets: Figure 4 - Supplement 1_Stat, Figure 4 - Supplement 2_Stat, Figure 4 - Supplement 3_Stat, Figure 4 - Supplement 4_Stat, Figure 4 - Supplement 5_Stat]
