# Supplementary material for: Drosulfakinin signaling encodes early-life memory for adaptive social plasticity
Source: eLife. 2024 Dec 18;13:e103973. doi: 10.7554/eLife.103973 (PMC11706606; doi:10.7554/eLife.103973)
Supplement: Figure 5—source data 1. [file elife-103973-fig5-data1.xlsx]

## Sheet: DGRP_Raw_count
FlyBase ID	GeneName	73Grp_1	73Grp_2	73Iso_1	73Iso_2	370Grp_1	370Grp_2	370Iso_1	370Iso_2	563Grp_1	563Grp_2	563Iso_1	563Iso_2	360Grp_1	360Grp_2	360Iso_1	360Iso_2	317Grp_1	317Grp_2	317Iso_1	317Iso_2	707Grp_1	707Grp_2	707Iso_1	707Iso_2
FBgn0000003	7SLRNA:CR32864	10	8	0	0	25	43	12	19	7	21	10	19	7	6	8	7	17	17	3	5	1	15	10	374
FBgn0000008	a	1379	732	718	636	1745	759	1044	962	807	733	785	835	1379	826	1218	1234	836	1696	1210	1001	1162	1181	830	560
FBgn0000014	abd-A	0	0	2	0	1	0	1	0	0	0	0	0	1	0	0	0	0	1	1	0	0	0	0	1
FBgn0000015	Abd-B	6	0	1	1	3	0	2	0	10	0	8	17	2	4	1	0	2	5	2	0	3	1	1	0
FBgn0000017	Abl	7778	2812	3473	2878	7883	1961	6358	3208	4945	3258	3832	3976	6717	3003	4419	5046	3772	6671	4821	3378	6195	5229	3376	2328
FBgn0000018	abo	226	93	155	134	208	97	187	118	94	94	123	108	188	119	221	243	78	255	153	116	149	145	209	125
FBgn0000024	Ace	16127	6537	9198	7600	14508	4914	13640	7507	7668	5163	8375	9688	16690	6803	13938	14261	5272	9148	9016	4270	26607	14729	13737	7845
FBgn0000028	acj6	2659	1047	492	509	2797	916	1695	944	1798	1061	1382	2190	1460	665	724	897	984	1616	941	437	1864	1138	577	598
FBgn0000032	Acph-1	401	248	244	244	419	114	477	308	247	188	235	208	327	198	348	358	195	323	367	208	442	311	347	180
FBgn0000036	nAChRalpha1	18606	7270	4062	3564	23561	6417	12040	8711	10759	7246	8692	12178	12184	6858	5297	6549	7579	12973	6258	3221	11758	7155	3991	3828
FBgn0000037	mAChR-A	7287	2702	2497	2248	8415	2676	5458	3378	4272	2637	3366	3856	5807	2644	3199	3513	3240	5548	3298	1845	6043	4269	2316	1438
FBgn0000038	nAChRbeta1	45795	16913	10069	9152	58367	20642	40692	27631	24731	16436	22798	34012	31122	14409	15966	19631	18252	30276	18603	8342	27622	16375	9598	8122
FBgn0000039	nAChRalpha2	4417	2272	1450	1321	5844	3516	4034	3358	2679	2048	2359	2881	3175	1892	2283	2503	2253	3456	2366	1715	2911	2378	1663	1200
FBgn0000042	Act5C	44850	24880	27052	23420	47940	22798	44668	38273	30992	28718	32571	38598	37664	26361	34900	39715	23555	42106	43218	27588	47639	38066	32146	20253
FBgn0000043	Act42A	1409	715	640	548	1575	825	1174	944	813	953	1156	1203	1211	976	953	1043	725	1477	1377	1016	1235	1048	1006	584
FBgn0000044	Act57B	20560	10589	19141	16808	18748	12183	15122	9436	12571	12331	21856	20145	10127	8032	11410	12112	12492	14869	55086	38864	19219	24457	21343	12350
FBgn0000045	Act79B	3243	3367	4078	2550	3742	924	6296	3606	3571	1925	4335	9619	3439	1333	2888	5778	1731	4327	7761	13921	4233	2634	4584	2816
FBgn0000046	Act87E	5582	2306	4263	3153	4358	2283	3960	2717	2298	4277	4973	6557	2807	1799	2871	4255	2055	3157	9274	7296	4177	3848	4330	2435
FBgn0000047	Act88F	29	58	74	28	573	168	458	304	364	199	378	488	44	41	125	189	86	140	306	580	964	1798	521	440
FBgn0000052	Pfas	1798	858	4706	2491	1823	729	1690	1648	1833	2277	5805	2273	1261	1423	6189	6095	1104	2164	2666	2495	1180	903	7993	1796
FBgn0000053	Gart	1503	772	7089	2899	1159	679	2658	3568	1041	1961	5525	2583	1019	1197	8844	8511	841	1668	3342	3247	623	594	8862	1521
FBgn0000055	Adh	245	130	222	276	90	61	235	201	30	52	91	121	178	123	535	611	135	466	408	246	99	82	217	141
FBgn0000057	adp	1648	907	960	784	2276	825	1913	1504	1041	815	1304	1291	1421	1078	1469	1528	898	1544	1191	1043	1479	1302	1368	886
FBgn0000061	al	9	8	11	7	8	0	12	12	13	11	13	17	10	7	8	14	2	13	18	12	6	9	12	7
FBgn0000063	Mps1	165	79	63	43	137	48	57	29	99	95	57	74	74	65	47	53	64	128	69	45	128	120	66	58
FBgn0000064	Ald1	35498	20801	44933	41170	34476	17599	49621	35225	20436	20195	41193	42346	34220	21560	49800	54116	26482	43264	58081	46120	38666	26236	52269	26004
FBgn0000071	Ama	229	116	121	104	130	53	102	80	44	28	84	18	47	83	43	67	101	203	117	35	66	29	65	27
FBgn0000075	amd	266	146	139	111	204	199	227	183	321	321	329	266	140	83	195	145	204	131	389	182	219	237	207	165
FBgn0000077	amx	494	369	347	313	467	248	509	473	303	319	438	533	446	345	421	495	277	489	362	294	527	417	394	224
FBgn0000078	Amy-d	38	21	688	117	476	141	1561	2235	2631	2831	1537	529	674	1087	4247	5994	49	248	208	516	229	291	8278	1715
FBgn0000079	Amy-p	96	33	1736	194	364	166	1718	2616	3884	3875	3488	1163	388	916	2408	3422	302	657	568	2104	208	222	5409	1324
FBgn0000083	AnxB9	6113	3829	5588	4723	5394	2737	5609	5099	3995	4132	6927	7395	5355	4741	6791	6256	3632	6956	6152	5403	5519	4849	7495	4639
FBgn0000084	AnxB10	8580	6094	3824	3905	9908	7354	8152	9312	5545	4999	7071	7049	7907	6708	6991	7480	5593	8167	6108	6278	6706	6903	7039	5655
FBgn0000092	dyw	800	219	166	78	168	93	195	56	208	2412	201	130	111	113	156	144	83	147	1035	99	67	212	53	42
FBgn0000094	Anp	0	0	0	0	1	0	3	2	1	0	0	0	0	0	0	0	0	0	0	1	0	0	0	0
FBgn0000097	aop	1709	626	999	811	1474	541	1583	743	1057	892	1187	1254	1233	539	1454	1445	735	1287	1633	781	2169	1520	1711	1034
FBgn0000100	RpLP0	25752	17721	31686	29697	34020	19623	25842	30992	20881	19859	27290	30757	25119	28428	38190	41279	16670	36097	25435	26964	25255	25177	44328	25758
FBgn0000108	Appl	75444	47819	33460	29365	88305	42422	59192	41234	47869	39918	48067	77436	66501	35932	40723	47543	40445	71098	44126	25648	79365	47042	35401	27362
FBgn0000109	Aprt	347	209	308	329	245	141	336	276	132	149	315	327	185	179	312	295	172	292	303	313	178	164	362	175
FBgn0000114	bru1	4867	2100	2197	2005	7410	2407	5314	3926	3430	3005	4808	5432	3112	1824	2903	3216	2499	3784	4420	2551	4165	2542	2914	2116
FBgn0000115	Arl1	967	566	556	495	970	890	965	957	547	549	790	1059	745	659	766	878	515	965	780	607	710	671	697	503
FBgn0000116	Argk1	86613	53830	72135	63457	80036	50689	113689	118958	52206	46685	92591	114242	82452	53763	91902	104653	43004	77847	95377	98571	76732	64277	73550	59496
FBgn0000117	arm	19179	9173	11809	9698	19464	7373	18862	15387	11189	9411	13008	13310	15467	9932	14895	16918	7727	16054	15353	11638	17391	14410	13567	8158
FBgn0000119	arr	1420	610	1030	874	1432	545	1401	901	886	687	887	850	1368	638	1336	1504	784	1338	1267	806	1445	1088	985	573
FBgn0000120	Arr1	371461	303146	290476	287709	212244	262247	609517	766336	241121	303846	324134	322812	605311	410854	466837	543899	160153	399527	261970	276653	507894	429742	379893	290739
FBgn0000121	Arr2	464970	312610	386824	357488	340413	339944	664763	711832	293866	263248	284462	236453	572629	369475	606361	667073	196364	398405	375218	378275	554326	543928	385282	276781
FBgn0000137	ase	0	2	0	0	0	0	0	0	0	0	0	0	2	3	0	0	1	0	0	0	0	0	0	0
FBgn0000139	ash2	1045	652	715	609	1433	702	923	856	705	535	753	691	725	528	682	684	472	787	626	542	685	523	716	437
FBgn0000140	asp	35	24	18	8	43	0	6	11	8	5	2	3	7	6	2	3	15	19	12	10	7	11	6	5
FBgn0000146	aub	77	36	39	24	125	72	87	91	28	18	33	60	26	16	19	19	29	43	19	5	44	32	38	24
FBgn0000147	aurA	42	28	32	20	180	46	65	43	36	69	46	24	120	104	32	38	72	120	27	17	48	39	23	16
FBgn0000150	awd	11343	7990	9409	9734	11794	13761	15807	20811	8355	7335	16569	16683	13561	13708	17159	16740	8675	12620	13370	14325	10313	9325	16958	11120
FBgn0000152	Axs	764	398	468	356	790	409	491	410	490	437	493	809	608	435	459	433	468	853	768	476	433	432	450	282
FBgn0000153	b	783	359	529	524	458	423	760	699	398	1160	605	740	587	348	860	890	425	592	1078	840	563	527	755	480
FBgn0000157	Dll	716	304	428	320	761	215	506	482	484	375	518	625	599	401	568	631	484	781	540	362	590	476	452	338
FBgn0000158	bam	2	2	1	0	0	0	4	3	0	2	4	12	2	0	0	0	0	3	0	2	1	0	8	6
FBgn0000163	baz	1608	668	1646	1371	1503	636	2081	1194	1081	790	1584	1319	1509	860	2037	2014	996	1753	1773	1265	1681	1145	1775	1068
FBgn0000166	bcd	0	0	1	0	7	0	0	0	1	0	0	0	0	0	0	0	0	1	0	0	0	4	3	0
FBgn0000173	ben	10147	7297	6418	6083	12393	7338	14919	10776	5509	6194	11118	14325	11605	6521	9004	9963	6192	10782	9034	5278	12506	6602	8091	5676
FBgn0000179	bi	3303	1035	907	831	3762	1021	2767	1344	2151	1094	1777	1856	2461	1198	1346	1733	1442	2266	1478	990	2230	1442	912	758
FBgn0000180	bib	643	344	295	273	552	73	706	503	414	317	333	297	542	358	501	469	412	696	506	358	756	475	456	264
FBgn0000181	bic	13333	8246	11763	9680	15956	8042	14515	15489	9637	7656	14716	17521	13155	12427	18958	19939	8787	16603	13710	12291	15225	11918	21512	13965
FBgn0000182	BicC	0	0	0	0	0	0	0	0	0	0	0	0	0	0	0	0	0	0	0	0	0	0	0	0
FBgn0000183	BicD	4335	2660	3536	2916	4390	2560	5297	3062	2261	2084	2938	2993	3894	1935	3540	4198	2315	3936	3549	2256	5339	3333	2985	1646
FBgn0000206	boss	4697	2040	6461	5609	3114	2429	11527	8070	4119	3838	7995	6486	6034	3283	12045	11804	3531	4235	12037	8881	6732	4589	9000	4961
FBgn0000212	brm	5384	2633	2315	2133	6633	2870	3983	3349	3811	2781	2836	3255	4639	2802	3322	3292	2865	4731	3075	2474	4391	3887	2409	1666
FBgn0000216	Brd	0	0	0	0	0	0	0	0	0	0	0	0	0	0	0	0	0	1	0	0	0	0	0	0
FBgn0000221	brn	268	210	193	200	351	333	332	343	235	254	199	198	293	235	244	297	131	302	206	187	201	179	153	134
FBgn0000227	Elba1	0	0	0	0	0	0	0	0	0	0	0	0	0	0	0	0	0	0	0	0	0	0	0	0
FBgn0000228	Nin	2919	1368	1857	1567	3597	1207	2419	1690	1981	1429	1427	1719	2629	1321	2034	2079	1337	2714	1837	1442	2355	2113	1534	1016
FBgn0000229	bsk	6091	3495	3177	2737	6865	4036	6780	6357	3378	2881	3963	4935	5118	2953	4840	5232	2673	4594	4552	2362	6042	3731	3914	2239
FBgn0000233	btd	68	33	27	19	54	55	55	20	45	39	33	44	62	31	45	45	35	72	48	36	53	46	38	13
FBgn0000239	bur	2837	1286	2329	1932	2736	985	2628	2099	1726	1507	1972	2037	2283	1457	3168	3125	1255	2624	2334	1574	2404	1665	2539	1228
FBgn0000241	bw	734	404	817	822	269	248	930	702	720	574	1041	1078	637	250	862	763	398	646	1128	939	1067	688	1067	548
FBgn0000244	by	2261	1227	2561	2275	2714	1571	3127	2339	1406	1253	2119	2000	2043	1223	3121	3116	1323	2398	2200	1965	2081	1735	3305	1699
FBgn0000246	c(3)G	299	147	171	153	436	206	275	267	250	132	195	222	282	147	195	199	179	287	169	85	326	155	124	76
FBgn0000247	ca	3509	1347	2049	1726	3560	1044	2999	1813	2396	1807	2110	2345	3127	1542	2449	2773	1595	3236	2274	1556	2821	2359	1793	1045
FBgn0000250	cact	6099	3306	3777	3027	6849	3112	5659	4866	4089	3326	4652	5858	4945	3408	4916	5385	3757	6113	4952	3868	5148	3961	4887	3404
FBgn0000251	cad	3	1	7	4	1	0	14	1	6	0	8	0	2	1	1	3	0	4	1	1	1	2	1	1
FBgn0000253	Cam	275232	141667	121728	113856	313540	152071	312282	255634	156743	138013	227291	311858	220574	111401	196590	220044	142885	194959	240024	115004	261785	124620	157961	123230
FBgn0000256	capu	6863	3014	2357	2162	7068	2790	5239	4121	5610	3749	4914	5642	4420	2607	2745	3435	3539	5801	3730	2565	4356	3527	2317	1977
FBgn0000257	car	2027	1024	1041	889	2340	1389	2032	1530	1195	932	1023	1020	1480	888	1238	1444	876	1607	1260	933	1738	1405	1048	783
FBgn0000259	CkIIbeta	6346	2958	2920	2567	7111	3134	5546	3841	4182	2857	4103	4875	4849	2477	3815	4166	2935	4732	4195	2008	5944	3475	3279	2017
FBgn0000261	Cat	4729	3306	6366	5589	4015	3022	5326	5038	5223	3939	13121	14670	5024	3926	11283	11211	2553	5064	9539	6245	3540	3950	10292	5472
FBgn0000273	Pka-C1	18511	6685	10074	7999	20452	8217	17017	10157	18098	11983	19778	26290	13947	6170	10577	11495	14266	21304	16592	7362	15973	8028	8625	4922
FBgn0000274	Pka-C2	1	0	0	0	0	0	1	3	8	6	1	0	0	1	2	0	0	0	2	0	2	2	0	0
FBgn0000276	CecA1	5	22	183	1	93	55	96	53	17	3	178	154	18	39	23	26	36	69	74	254	53	8	18	1
FBgn0000277	CecA2	3	17	172	5	45	0	67	22	10	10	83	88	13	43	52	25	22	74	80	232	70	8	10	9
FBgn0000278	CecB	4	7	43	2	3	0	1	0	7	5	32	14	5	7	4	2	2	10	40	24	39	6	2	0
FBgn0000279	CecC	13	24	286	4	11	0	16	0	31	51	42	3	26	64	22	11	14	50	99	100	150	28	14	7
FBgn0000281	Cec2	0	0	0	0	0	0	6	2	0	0	0	0	0	0	0	0	0	1	2	3	5	0	1	9
FBgn0000283	Cp190	4822	2018	2317	2037	6581	2151	3652	2632	3522	2265	2253	2337	4056	2211	2870	3074	2274	4181	2497	1724	4248	3557	2191	1402
FBgn0000286	Cf2	3161	1873	1806	1757	2749	1430	2754	2169	1605	1772	2209	3448	3848	2458	2748	3090	2539	4710	2466	1409	2787	1826	1752	1157
FBgn0000287	salr	2381	889	1030	946	2723	745	2055	1409	1872	1046	1197	1098	1538	900	1299	1504	944	1825	1180	952	1701	1370	1095	773
FBgn0000289	cg	11001	4703	4763	4027	13323	4562	8761	6290	7163	4828	5330	6211	8847	4913	5936	6728	5516	9277	6171	3841	8630	6911	4327	2992
FBgn0000299	Col4a1	4588	2125	4453	3427	2144	1405	5291	2716	7484	6040	7653	7354	5920	4041	9449	9716	3853	6037	11948	10927	5609	4399	10943	6197
FBgn0000303	ChAT	10982	5403	3838	3566	13459	6512	9911	7157	5422	4046	5625	6990	8568	5184	5313	6340	5372	7869	6145	3746	9207	6711	4203	3294
FBgn0000307	chif	4022	1373	2099	1847	4247	1441	3606	2117	2562	1712	1940	1799	3033	1337	2493	2786	1690	2853	2475	1661	3388	2827	1884	1129
FBgn0000308	chic	16930	9470	7424	7214	25949	10551	18607	16937	13029	9723	14819	20971	16178	11522	12821	14658	11164	18739	12002	7418	19541	11896	14536	10330
FBgn0000316	cin	1277	596	796	664	1532	488	1230	868	646	500	710	776	964	611	1004	935	571	1032	822	579	1125	743	856	434
FBgn0000317	ck	579	233	874	722	374	163	660	422	349	300	591	550	513	246	1085	960	335	650	930	625	568	395	823	397
FBgn0000318	cl	2815	2309	1951	1794	3491	3511	3829	5205	2312	2125	3643	4622	3345	3394	3462	3854	2223	3669	3363	3193	2584	2238	2717	1924
FBgn0000319	Chc	13784	6419	11448	9461	12832	5984	14665	10345	7381	6367	8958	9475	10792	6612	12931	14118	5591	11032	13061	9540	12500	9575	10756	5917
FBgn0000320	eya	1617	835	1389	1314	1000	554	1909	1406	831	799	1774	1463	1283	512	1563	1813	813	1166	2104	1686	1930	1172	1563	1146
FBgn0000326	clt	918	575	657	664	976	812	1061	956	603	447	636	644	786	567	923	987	445	760	784	549	707	574	822	507
FBgn0000330	cm	967	646	788	619	1108	733	1178	1004	522	513	754	840	933	685	973	983	503	1014	857	745	843	790	853	548
FBgn0000337	cn	18	3	32	49	12	0	30	18	6	2	25	22	14	8	32	29	14	14	47	29	11	13	30	16
FBgn0000339	cni	709	495	792	646	710	584	1218	942	435	481	773	846	796	647	1068	1210	434	868	859	533	902	646	1039	528
FBgn0000346	comt	29747	14341	13692	11616	26178	10510	27673	21038	13247	12482	15795	15400	19313	9816	17371	19751	9633	16406	19031	12798	25976	17934	15947	9798
FBgn0000351	cort	68	23	23	16	80	0	38	37	37	18	28	12	39	48	14	25	18	47	19	8	65	83	26	22
FBgn0000352	cos	2717	1302	1292	1121	2908	1101	2397	1663	1652	1441	1567	1548	2693	1425	1968	2328	1317	2709	1976	1427	2580	1941	1364	794
FBgn0000355	Cp15	0	0	0	0	0	0	0	0	0	0	0	0	0	0	0	0	2	0	0	0	0	0	1	0
FBgn0000357	Cp18	266	111	47	54	438	289	174	189	186	90	73	116	174	155	66	95	96	167	53	50	96	77	11	27
FBgn0000358	Cp19	5	0	4	2	3	17	1	0	0	2	5	15	4	1	4	5	9	20	38	28	12	6	2	6
FBgn0000359	Cp36	0	0	2	0	11	0	0	0	0	0	3	0	1	0	0	0	0	0	0	0	0	0	0	0
FBgn0000360	Cp38	0	0	0	0	2	0	1	0	0	4	0	0	3	0	0	0	0	0	0	0	0	0	0	0
FBgn0000370	crc	2394	1289	6552	5303	3270	1176	7392	3358	2563	1877	3847	2777	3426	2412	10590	11267	1933	3857	5936	4419	4384	3095	8504	3613
FBgn0000376	crm	1345	535	669	591	1396	628	1060	769	793	607	681	655	969	567	843	829	587	1038	749	600	1025	1041	693	374
FBgn0000377	crn	1588	1053	942	833	1992	1468	1617	1500	1100	825	1033	1093	1292	930	1158	1109	1019	1412	1010	758	1370	1068	1194	679
FBgn0000382	csw	22694	9515	10799	9586	22842	8758	15758	11364	15413	10108	13100	16871	14498	7258	9759	10842	9529	14281	11122	5752	17904	10492	9241	6457
FBgn0000384	cta	663	655	678	542	940	599	1194	797	460	576	669	857	921	485	796	911	687	1055	911	402	1127	586	593	351
FBgn0000394	cv	904	452	963	831	712	374	846	727	652	541	1043	1070	855	546	1269	1239	590	1012	1249	849	742	581	1162	596
FBgn0000395	cv-2	1019	425	600	500	965	418	747	422	648	549	965	637	873	615	726	840	839	1370	1216	759	800	685	959	881
FBgn0000404	CycA	46	16	79	45	76	12	41	27	35	31	36	27	36	21	52	58	37	53	46	42	62	39	34	14
FBgn0000405	CycB	8	2	102	36	24	0	37	29	29	16	21	37	29	26	48	48	13	5	20	6	47	35	36	22
FBgn0000406	Cyt-b5-r	2231	1630	12091	8972	1641	489	3881	5511	5157	8007	10796	7061	2403	4122	24632	26055	1885	5375	7773	8938	850	940	24296	7761
FBgn0000411	D	1594	683	518	482	1742	881	1325	1050	1048	707	1015	1140	1191	766	895	970	666	1343	916	648	1365	1026	710	509
FBgn0000412	D1	11035	7205	3564	3427	16015	7121	9066	9722	7735	6012	6334	8887	9189	7366	5709	6280	6812	9851	4965	4163	10558	8591	5764	4881
FBgn0000414	Dab	10334	3708	5526	4799	7874	3232	6619	3540	7227	4635	5288	5120	8109	4183	6087	7196	4732	8979	6208	4552	8222	7516	5033	3215
FBgn0000416	Sap-r	21364	10344	25939	21068	14040	8712	20566	16246	14692	17003	15306	12251	15650	10129	28938	28646	8210	15172	21392	15424	15334	13832	28204	12230
FBgn0000422	Ddc	11254	5337	3412	3024	39210	14911	20733	16937	13974	11534	11971	15518	28608	18007	15377	18500	15931	30175	13683	10116	18695	16604	8184	7234
FBgn0000426	SmF	211	171	113	103	295	241	199	151	198	169	152	213	198	250	174	193	173	289	93	121	208	168	156	155
FBgn0000427	dec	2	0	2	0	0	0	0	0	0	0	0	0	1	2	0	0	0	1	0	0	0	0	2	0
FBgn0000439	Dfd	812	411	657	466	836	209	542	430	971	641	725	773	860	573	709	663	560	978	836	561	804	637	767	416
FBgn0000442	Pkg21D	306	171	314	327	215	240	409	318	189	186	373	322	214	124	361	378	118	170	402	311	407	332	390	264
FBgn0000447	Dhod	876	558	644	510	1173	925	1178	950	579	548	691	661	996	894	1046	1114	542	943	662	608	1049	980	1282	661
FBgn0000448	Hr3	2651	1175	723	644	3618	917	2932	1499	1343	1072	1756	2377	2197	867	1299	1417	293	506	365	122	2988	1182	981	593
FBgn0000449	dib	20	7	5	2	59	0	12	8	0	9	8	7	3	5	0	3	3	8	2	0	10	3	0	10
FBgn0000451	ect	179	120	90	67	27	64	76	40	70	54	207	265	98	68	175	163	36	60	207	87	62	39	101	70
FBgn0000454	Dip-B	4221	2159	2638	2308	3244	2151	6681	5216	2459	3293	4937	4959	5110	3375	6305	6525	2358	4496	4457	3809	3073	2382	4248	2371
FBgn0000455	Dip-C	1687	1205	987	984	2119	1526	1994	2184	1003	1251	1416	1358	1390	1285	1477	1712	874	1357	1426	1217	1418	1359	1746	1042
FBgn0000459	disco	831	341	591	570	944	313	822	599	603	664	859	930	751	526	1139	1151	409	1068	589	456	525	400	838	424
FBgn0000463	Dl	438	124	337	279	335	137	394	185	251	211	420	438	319	109	290	272	224	306	443	181	370	235	332	196
FBgn0000464	Lar	1069	599	391	397	1517	670	1027	909	677	441	744	1162	797	531	448	434	538	883	487	205	1078	489	332	269
FBgn0000473	Cyp6a2	536	360	963	753	80	27	136	68	6412	9033	2688	2464	2146	1716	4574	4550	713	2004	1266	1185	3792	3563	12919	6000
FBgn0000477	DNaseII	700	465	1445	1397	181	153	674	625	353	777	691	606	563	498	2610	2281	364	768	1027	1942	344	266	2073	699
FBgn0000479	dnc	45469	22620	11916	10619	68087	24194	37816	31139	31183	22013	30592	47567	36886	20765	17712	21795	26224	41071	22260	11100	38661	21144	15479	14036
FBgn0000482	dor	1346	602	687	609	1460	945	1242	1193	810	677	812	722	993	685	961	1038	552	1181	854	718	1096	997	815	538
FBgn0000489	Pka-C3	7254	3293	2702	2365	7015	2470	5911	4323	8330	5098	8596	10553	4331	2142	3394	3862	3205	4261	4126	2607	4313	2592	2892	1931
FBgn0000490	dpp	583	233	642	476	552	274	584	437	450	377	622	691	743	416	785	745	450	694	764	580	610	420	681	460
FBgn0000492	Dr	399	229	432	228	385	84	270	310	230	213	265	414	224	253	435	470	149	413	239	257	180	225	428	305
FBgn0000499	dsh	2631	1155	1171	968	3129	1122	2485	1715	1729	1189	1477	1424	2275	1432	1723	1899	1221	2295	1568	1193	2245	1814	1511	954
FBgn0000500	Dsk	4931	4501	1266	1281	9299	9444	2031	2626	4052	4533	1072	1540	5821	5962	1294	1374	3348	7155	761	694	6460	5223	2161	1327
FBgn0000504	dsx	1007	440	1181	928	717	377	1275	623	540	524	859	1102	1057	508	1480	1760	753	1324	876	643	672	500	743	351
FBgn0000520	dwg	1228	817	457	412	1780	907	1096	1071	757	645	658	826	974	819	680	742	606	1153	590	619	944	873	638	468
FBgn0000524	dx	181	57	228	162	135	50	148	108	124	118	164	157	169	88	277	255	134	167	249	178	204	162	259	86
FBgn0000527	e	1337	430	645	510	291	190	674	385	511	2513	858	877	521	414	744	722	427	600	2037	874	154	305	366	161
FBgn0000529	bsh	395	274	123	153	534	168	360	256	281	243	231	230	332	228	143	199	254	365	212	155	330	314	185	118
FBgn0000533	ea	423	299	398	360	686	513	543	414	898	721	574	752	957	1025	977	819	815	1416	840	926	668	708	728	429
FBgn0000535	eag	34084	11111	9423	9288	13058	3739	9800	4709	7841	4551	7824	8671	7687	2889	4302	5368	4550	6745	4740	2179	8123	4001	3137	2280
FBgn0000536	eas	3097	1640	3458	3214	3235	1577	3715	3032	1859	1605	2869	2738	3081	1721	6032	5583	1759	3425	3890	2643	2832	1937	4277	1779
FBgn0000541	E(bx)	7598	3152	4299	3553	8310	2921	6129	4068	4514	3421	4054	4570	6182	2827	4597	5115	3538	6638	4625	2633	7228	4528	3382	1887
FBgn0000542	ec	233	48	146	103	140	54	222	107	149	170	260	258	220	92	330	315	114	194	578	241	199	193	213	112
FBgn0000543	ecd	1958	1095	895	874	2380	1085	1834	1956	1354	1138	1182	1383	1681	1309	1361	1571	1150	1914	1370	1214	1559	1557	1141	797
FBgn0000546	EcR	3020	1201	1962	1581	2476	1182	2625	1204	1371	1195	1803	1722	2299	956	1814	2077	1281	2361	1864	944	2979	1606	1537	790
FBgn0000547	ed	6163	2302	3075	2715	6927	2176	6658	3560	3671	2658	5255	5515	4762	1974	4406	4367	3040	4029	5314	2642	5954	3095	3684	2589
FBgn0000551	Edg78E	67	36	18	13	147	45	77	94	54	44	37	97	82	63	28	44	49	90	22	18	49	45	15	24
FBgn0000552	Edg84A	4	11	2	5	33	3	18	11	0	6	13	1	15	9	6	8	12	12	13	5	10	17	3	2
FBgn0000557	eEF1alpha2	38176	18707	37078	32060	38785	14269	57421	40016	25238	16099	32761	32507	40681	21820	51850	54616	16547	32435	34207	29444	45910	33017	37356	21976
FBgn0000559	eEF2	66764	33625	96115	88065	67388	41373	90146	72685	51199	51387	76048	70961	56530	47253	130217	125920	44075	78726	92867	83776	71917	59800	122529	64162
FBgn0000560	eg	12	8	12	10	11	5	17	22	4	2	6	4	14	16	34	40	12	17	18	13	3	7	15	10
FBgn0000562	egl	2565	1246	2353	2032	2264	844	2854	2092	1855	1377	2061	1801	2715	1487	3620	3615	1521	2428	3049	2268	2686	2053	2707	1482
FBgn0000564	Eh	73	60	21	3	11	0	26	10	261	255	153	121	1030	826	940	1141	257	222	417	275	2	55	1	3
FBgn0000565	MsrA	3245	2563	2593	2850	4648	3377	6635	7652	3880	4191	3343	4925	5518	5029	3764	4879	4844	11045	3419	3733	4051	3685	3563	2641
FBgn0000566	Cth	828	535	825	811	991	514	859	774	927	793	793	831	913	905	1247	1441	619	1194	895	823	704	688	985	523
FBgn0000567	Eip74EF	2595	997	1339	1295	1188	724	1624	852	930	896	1167	936	1253	533	1207	1442	1072	1960	2055	926	1166	888	889	563
FBgn0000568	Eip75B	13747	5813	5721	4977	17834	5546	12643	7061	11722	7154	10227	9014	12324	5746	8332	10398	7324	11643	7404	4293	12947	7915	7700	6068
FBgn0000575	emc	8820	4983	5628	4320	9748	2977	8273	6096	5301	4371	5720	6179	7769	4244	6549	7689	3711	7894	5626	3562	8983	5575	5540	3644
FBgn0000576	ems	98	55	71	32	156	45	107	54	83	65	87	82	117	94	135	150	69	113	105	77	81	75	96	43
FBgn0000577	en	144	37	66	42	166	29	141	120	94	64	84	121	108	61	106	97	77	92	121	80	125	81	84	77
FBgn0000578	ena	2581	965	1186	1013	3120	830	2352	1381	1812	1238	1436	1588	2349	982	1735	1890	1393	2323	1862	1117	2227	1475	1282	835
FBgn0000579	Eno	29253	20170	28739	26057	30926	22446	37475	37752	18674	22416	35654	38906	26767	21755	38719	42556	19714	35085	44516	43048	28966	26478	41198	24473
FBgn0000581	E(Pc)	4470	1866	3257	2732	4774	1906	4065	1982	2671	2087	2491	2411	3712	1826	3033	3411	2079	3992	2846	1805	4207	2945	2328	1398
FBgn0000588	esc	288	59	95	85	531	227	442	174	253	142	233	184	188	61	94	113	91	154	122	78	144	75	63	61
FBgn0000591	E(spl)m8-HLH	0	1	0	0	0	0	0	0	0	0	0	0	0	0	0	0	0	0	0	0	0	0	0	0
FBgn0000592	Est-6	809	609	4709	5090	397	827	2365	2392	1460	1399	5757	6844	1103	784	6520	6316	399	977	2339	2058	878	585	11915	4473
FBgn0000594	Est-P	1	2	3	1	0	0	4	2	0	4	21	20	23	12	42	47	9	62	24	27	16	11	45	37
FBgn0000606	eve	16	6	3	1	19	18	10	10	3	2	2	9	5	4	9	11	1	6	8	3	3	9	1	1
FBgn0000611	exd	5885	3471	4318	3557	6168	2246	5800	3358	3333	2577	3719	4171	4854	2409	4586	4963	2436	5058	4743	2564	6708	3692	4109	1800
FBgn0000615	exu	17	6	85	71	19	17	37	56	9	12	10	14	4	2	41	36	9	4	15	12	7	14	32	9
FBgn0000617	Taf9	399	246	246	252	560	333	525	545	304	243	408	506	409	353	455	392	266	477	352	294	399	398	390	246
FBgn0000618	e(y)2	276	198	165	138	299	333	290	400	138	178	318	328	266	245	220	231	181	297	208	177	265	221	205	203
FBgn0000625	eyg	1178	571	343	332	680	313	922	794	506	359	659	645	656	364	504	595	367	605	580	490	496	407	395	370
FBgn0000629	E(z)	1447	801	756	695	2123	1142	1239	1050	1012	761	849	1028	1224	844	987	1102	761	1458	865	625	1256	1030	820	546
FBgn0000633	tei	4311	1705	1970	1778	5047	1736	3936	2459	2452	1571	2132	2555	3607	1796	2416	2784	2080	3479	2684	1606	4323	2670	1910	1289
FBgn0000635	Fas2	7305	2848	3644	3202	5512	2215	5444	3307	4208	2884	4554	5303	5630	2793	4397	5292	3577	5814	4705	2813	5599	3691	3848	2543
FBgn0000636	Fas3	3579	1547	1740	1532	2618	968	2658	1987	2218	1444	2960	3264	2642	1308	2287	2461	1877	2960	3281	1899	2600	1576	2162	1278
FBgn0000639	Fbp1	68	52	20	8	27	10	9	2	18	12	83	20	10	13	10	5	7	10	543	6	13	33	8	2
FBgn0000640	Fbp2	46	44	5	2	7	0	3	0	0	4	63	2	3	0	1	0	2	3	264	5	1	7	5	3
FBgn0000644	Fcp3C	66	58	23	20	174	23	113	103	40	53	39	84	48	56	37	54	29	80	38	25	40	41	28	8
FBgn0000658	fj	183	63	111	73	122	49	117	100	101	85	209	174	124	61	189	145	217	241	801	279	99	96	109	63
FBgn0000659	fkh	1976	766	599	517	1962	433	1466	821	1137	802	1124	1312	1620	805	947	1074	827	1594	1000	563	1611	1181	688	519
FBgn0000662	fl(2)d	6568	3281	2335	2106	7914	3270	4790	4260	4319	2980	3511	4419	5201	3278	3382	4156	3060	5752	3135	2504	5243	4370	2629	2019
FBgn0000667	Actn	8151	3851	6730	5096	7290	3322	6749	5318	4897	4133	7565	8868	6009	3361	5480	7078	4475	7302	12388	10243	6467	5971	6409	4325
FBgn0000709	fliI	2889	1014	1077	1017	3131	1053	2322	1468	1547	1026	1394	1218	1813	920	1572	1677	1142	1859	1482	1123	2005	1509	1186	742
FBgn0000711	flw	17298	9980	9644	9226	17568	11431	21183	14821	10697	10184	14119	18960	15211	8472	12781	14429	9612	15407	13765	7252	18313	9271	9872	6874
FBgn0000715	FMRFa	1850	1255	481	466	2589	1207	1220	1410	1044	673	807	884	1371	1154	712	840	819	1482	579	462	1253	1039	647	498
FBgn0000719	fog	1776	816	1195	966	1151	416	1466	766	798	664	1097	1144	1607	809	1620	1620	705	1263	1309	834	1526	957	1229	747
FBgn0000721	for	1959	882	3188	2554	1848	757	2580	2009	1901	1585	2681	2408	2032	1297	4359	4605	1307	2473	3076	2635	1968	1601	4851	2108
FBgn0000723	FER	4278	2287	3930	3457	3775	1898	5278	4061	3047	2578	3880	3839	3452	2181	4572	5596	2864	3857	4554	3720	3970	2686	4095	3062
FBgn0000808	gd	9	2	7	4	1	0	2	1	18	0	5	0	4	2	1	3	5	5	6	0	0	0	0	2
FBgn0000810	fs(1)K10	878	457	570	458	861	282	762	433	657	436	615	568	789	469	562	687	376	751	580	441	732	594	518	293
FBgn0000826	png	75	40	21	19	103	87	61	41	19	13	16	37	33	18	29	35	30	56	19	6	28	30	14	4
FBgn0000927	fs(1)Ya	22	13	30	8	34	16	17	3	24	8	6	19	10	9	7	19	14	13	9	8	19	10	15	8
FBgn0000928	fs(1)Yb	30	12	14	13	35	10	24	5	41	19	12	30	15	31	22	13	19	28	16	15	27	19	15	1
FBgn0000964	tj	430	305	433	357	488	175	523	356	260	197	420	473	345	157	435	389	159	262	399	287	426	308	425	242
FBgn0000996	dup	209	88	119	111	235	21	206	145	148	150	142	223	146	112	214	207	112	222	220	162	169	152	133	71
FBgn0001075	ft	185	90	112	85	141	11	148	81	68	127	132	129	85	25	91	119	109	71	324	130	178	139	86	74
FBgn0001077	ftz	12	3	2	3	21	0	7	6	4	6	1	2	2	1	3	5	3	5	5	1	10	12	4	8
FBgn0001078	ftz-f1	4993	2183	2517	2310	5990	2084	4679	2523	2813	1789	3265	3525	4203	1895	2878	3212	2368	4208	3159	1547	5731	2861	2643	1531
FBgn0001079	fu	822	357	482	403	932	317	741	598	424	385	382	386	590	401	603	659	302	611	548	473	671	542	462	300
FBgn0001083	fw	505	187	624	611	335	78	559	418	252	258	533	342	414	143	899	875	342	281	1242	955	690	438	809	461
FBgn0001084	fy	297	113	154	147	335	143	271	196	114	146	155	198	292	147	174	218	118	248	149	123	276	228	161	106
FBgn0001085	fz	945	413	348	366	865	497	716	535	485	447	499	527	621	314	477	508	417	671	560	274	801	417	328	244
FBgn0001086	fzy	17	7	10	5	14	0	14	10	11	3	4	8	12	7	4	5	20	26	25	17	8	7	0	3
FBgn0001087	g	7377	2924	2553	2336	10012	3620	6477	4742	4820	3187	3948	4838	5439	2951	3284	3599	3214	5435	3397	2185	4987	3594	2586	1969
FBgn0001089	Gal	454	310	466	440	399	288	629	556	700	510	497	493	685	491	825	732	313	634	494	396	557	595	690	427
FBgn0001090	bnb	12636	6086	6583	5681	12540	3974	10658	8786	10748	7602	6787	7020	10409	7091	9646	10553	6059	12852	12354	8447	13301	12360	10852	7376
FBgn0001091	Gapdh1	20898	12941	21500	19807	20931	17318	28396	30640	14701	14329	33543	39611	19576	14554	34097	36858	14451	22457	39625	41019	20441	16578	31983	18710
FBgn0001092	Gapdh2	26120	15305	18283	17755	27859	17425	27753	29033	14896	13958	24262	28257	18917	14891	24574	26284	14142	23676	34886	28503	22554	17948	22950	13662
FBgn0001098	Gdh	25077	12305	22349	19505	21952	14218	41971	36114	15313	11635	26042	22991	21968	12301	33778	38148	12666	19136	37707	33480	23618	18371	24586	15685
FBgn0001099	gdl	2	0	5	1	4	0	9	6	1	0	2	0	4	4	0	0	0	4	0	0	1	1	0	1
FBgn0001104	Galphai	963	591	978	749	1026	627	1069	807	742	524	913	974	772	462	1059	1123	560	903	1114	740	754	574	1173	672
FBgn0001105	Gbeta13F	49203	28965	16513	15630	71806	34870	45987	40122	30564	24840	35636	53264	38992	26100	22922	27545	28973	42082	26937	14657	46795	25171	20674	18491
FBgn0001108	DCTN1-p150	4361	2029	2518	2234	4809	1683	3869	2821	2778	2094	2366	2460	3228	1916	2619	2849	2101	3728	3006	2172	3280	3029	2455	1545
FBgn0001112	Gld	382	232	636	538	254	160	230	74	414	210	502	452	281	167	377	351	416	526	700	558	335	259	553	256
FBgn0001114	Glt	2447	1269	8321	8196	1527	418	3455	4161	11580	14081	8321	8070	2286	2965	18985	16168	1735	3809	9031	10858	1147	1421	19436	7060
FBgn0001120	gnu	6	1	19	2	2	0	0	0	0	1	2	6	0	3	2	3	0	0	0	0	1	0	1	2
FBgn0001122	Galphao	26437	9861	9983	8398	27342	9515	20762	9971	12753	8064	13408	14825	16397	6663	10409	11323	13051	17264	16000	6229	19001	8892	7529	4200
FBgn0001123	Galphas	6438	3393	2780	2418	7664	3430	5120	4366	3864	2694	3641	4558	4659	2743	3418	3953	2762	4770	3752	2259	5567	3388	3075	2103
FBgn0001124	Got1	5393	3550	6510	5763	5626	3873	9611	9407	3764	3994	9299	8249	6295	5040	13665	13909	4181	7620	8337	7568	4429	3500	7996	3377
FBgn0001125	Got2	5072	2918	5873	4865	5090	4196	8306	9945	3933	5298	11609	9853	5741	5773	21396	21773	4500	8278	11997	10987	4522	3817	10586	4239
FBgn0001128	Gpdh1	11666	6224	9750	9578	10544	6009	14009	12444	6685	6827	13240	13584	8029	4731	14038	13496	5819	8508	18250	13265	11938	8673	19154	9957
FBgn0001133	grau	1407	944	662	640	1959	782	1152	1156	985	667	869	978	1053	868	870	945	666	1110	808	770	1061	1115	827	539
FBgn0001134	Grd	357	154	194	170	353	42	395	280	195	154	199	101	260	110	219	318	138	221	338	181	316	224	178	134
FBgn0001137	grk	404	243	398	348	711	404	674	523	405	323	566	739	307	172	357	401	301	480	414	277	679	478	651	427
FBgn0001138	grn	584	251	186	178	631	210	426	262	309	192	305	362	480	203	300	305	307	440	355	220	419	283	254	162
FBgn0001139	gro	8887	3110	2978	2791	10947	3113	6441	4139	5290	3083	4036	3780	5788	3158	3846	4204	3973	6052	4011	2306	6252	4133	3192	2344
FBgn0001142	Gs1	8205	5373	6006	4410	9306	4875	10665	8774	4828	4598	7606	7464	7290	4720	6950	7324	4507	7566	9315	6516	9541	6686	10806	4721
FBgn0001145	Gs2	22943	10788	24138	21332	10357	7159	23595	18518	13880	13043	27594	28590	15629	9060	27518	28641	11034	18716	32276	24197	19142	13019	30342	18112
FBgn0001147	gsb-n	4	0	3	4	0	0	3	3	2	2	3	3	7	5	21	15	6	15	8	4	1	4	4	3
FBgn0001148	gsb	0	2	3	0	0	0	1	1	0	1	0	1	1	0	5	5	2	2	5	0	0	0	6	2
FBgn0001149	GstD1	7055	5607	8292	8237	6359	4435	7594	8522	6456	6823	11985	14805	10719	11532	18406	21314	7375	17566	12011	11998	7627	7348	14863	12003
FBgn0001150	gt	697	281	170	162	875	254	684	473	602	387	436	715	788	423	313	414	402	865	436	342	430	309	171	176
FBgn0001168	h	1082	628	1058	780	857	506	1034	916	796	673	1274	1448	1190	815	1820	1863	911	1720	1406	957	742	582	1737	1492
FBgn0001169	H	846	355	639	547	948	528	826	435	468	436	603	516	803	380	729	805	477	824	716	341	806	609	603	331
FBgn0001170	H2.0	22	2	23	20	27	23	24	29	21	10	14	22	25	21	15	23	6	22	18	15	14	14	6	6
FBgn0001174	halo	11	1	5	2	5	0	2	0	3	4	4	8	2	4	1	1	0	5	0	1	11	11	6	9
FBgn0001179	hay	897	388	405	330	1114	352	705	538	615	485	458	548	689	484	510	544	415	781	528	388	686	560	465	231
FBgn0001180	hb	340	194	198	175	432	142	285	204	210	199	221	216	298	151	227	275	165	340	282	265	277	251	200	142
FBgn0001185	her	1339	653	709	612	1772	648	1379	1085	989	688	891	969	1256	778	1075	1157	618	1194	886	653	1553	1036	984	602
FBgn0001186	Hex-A	28286	14115	11340	9811	39441	14664	26862	22685	20612	12272	26602	29015	23941	15958	18118	18547	21852	27720	22653	14164	24975	14803	18468	14369
FBgn0001187	Hex-C	780	733	2530	2296	429	309	790	1014	363	1002	2097	1120	473	896	3910	4097	543	1226	1681	1847	277	359	6515	1917
FBgn0001189	hfw	606	292	657	612	526	237	576	389	737	580	443	506	579	349	952	886	342	663	698	514	462	402	792	359
FBgn0001197	His2Av	4561	2436	1792	1456	4931	1975	3557	3382	3056	2651	3270	4376	3304	2802	2322	2587	2413	4279	2308	1863	3838	3043	2349	1928
FBgn0001202	hook	6504	3320	2971	2605	8156	3656	6230	6017	3922	3069	4053	4561	5192	3521	4002	4646	3358	5432	3839	3032	5025	3952	3397	2334
FBgn0001206	Hmr	740	309	307	216	865	486	490	370	365	342	360	369	504	279	309	362	332	604	357	276	535	498	299	181
FBgn0001208	Hn	1995	1043	8390	6013	890	393	2568	2554	1102	1965	6409	4451	2137	2220	12118	11722	1261	3627	5456	5253	1200	1060	11173	3142
FBgn0001215	Hrb98DE	20099	8881	7172	6557	19677	7120	16537	12196	10700	7140	9927	12884	14235	7893	10452	11157	9218	14753	9552	6379	13802	9897	8294	5581
FBgn0001216	Hsc70-1	1363	690	1112	934	1293	806	1467	1132	978	609	1326	1895	1141	642	1121	1378	886	1017	1284	1115	1285	1028	1271	818
FBgn0001217	Hsc70-2	1	0	7	5	23	13	14	8	9	11	9	7	5	5	9	4	5	22	2	6	5	9	5	5
FBgn0001218	Hsc70-3	12202	5960	11367	12351	10244	4957	11468	8156	10690	7245	8827	8930	10627	7391	12798	13163	6644	11403	10274	8703	10058	7886	14579	10793
FBgn0001220	Hsc70-5	9093	5248	7113	6685	6910	3727	7250	6077	5366	4276	6779	6486	7152	4845	8859	9343	4459	7686	9040	6941	8342	6718	8882	5258
FBgn0001222	Hsf	3590	1812	1917	1675	4263	1546	3005	2594	2129	1572	1966	2016	2777	1745	2433	2611	1542	2937	2092	1523	2870	2466	2051	1315
FBgn0001224	Hsp23	790	679	447	444	811	938	916	913	561	1074	2140	1744	788	729	595	567	1226	1691	2258	2190	1148	840	3208	3381
FBgn0001225	Hsp26	303	248	768	748	384	187	552	522	268	518	2852	1863	561	595	464	639	828	1067	1466	1515	455	412	3965	4264
FBgn0001226	Hsp27	349	217	137	115	190	101	185	160	365	261	1446	905	243	209	277	250	560	473	521	480	270	176	1487	1802
FBgn0001227	Hsp67Ba	2619	1681	933	944	2280	1207	2231	2269	1685	1345	1900	2383	2063	1445	1450	1553	1441	2092	1689	1418	2722	2091	1825	1617
FBgn0001228	CG4456	0	0	0	0	0	0	0	0	0	0	0	0	0	0	0	0	0	0	0	0	0	0	0	0
FBgn0001229	Hsp67Bc	678	515	346	370	636	546	832	740	359	299	746	784	640	346	641	688	407	594	681	424	683	465	651	537
FBgn0001230	Hsp68	1387	804	668	724	1114	468	498	589	618	681	2704	1769	1070	923	872	1077	1082	2174	1622	1470	553	544	3518	2652
FBgn0001233	Hsp83	40366	20562	30672	32798	38514	20866	40798	36033	30416	27692	28067	26966	32206	24034	41806	43330	16751	34625	24298	22900	33721	30577	32321	23636
FBgn0001234	lncRNA:Hsromega	12841	7369	8133	8208	10617	6324	10627	7885	5439	4575	7998	7742	7643	4537	7486	7680	5799	8579	8290	4494	9270	5782	6507	5766
FBgn0001235	hth	27674	11616	8506	8062	33813	9893	20747	13768	19547	13237	20521	27853	20563	11919	14493	16089	16252	25477	15442	6992	22149	10876	12585	9571
FBgn0001247	Ide	5318	2595	2754	2445	6405	2728	4389	3898	3246	2342	2786	3428	4028	2591	3353	3661	2617	4502	3332	2357	4416	3136	2696	1693
FBgn0001248	Idh	5632	3348	8726	8291	4455	2879	7854	6562	3820	3498	9484	8418	4663	4117	21377	19524	2958	6039	8662	8218	4745	4325	17580	7002
FBgn0001250	if	2088	1033	2250	1835	2043	819	2237	1412	1473	1085	2311	2697	1764	951	2500	2299	1407	2200	2499	1601	1880	1337	2406	1202
FBgn0001253	ImpE1	175	49	79	54	189	96	122	122	100	60	85	68	33	16	24	32	39	61	75	27	102	84	93	52
FBgn0001254	ImpE2	0	0	3	1	9	0	2	9	6	1	12	7	2	0	5	6	3	2	4	3	3	0	1	0
FBgn0001255	ImpE3	28	20	20	9	11	0	31	18	4	38	12	24	10	9	24	15	15	7	19	10	7	4	13	10
FBgn0001256	ImpL1	34	17	58	41	42	0	30	19	15	14	16	60	9	1	7	9	3	0	2	5	36	25	127	62
FBgn0001257	ImpL2	191	87	316	219	260	71	472	284	305	379	595	631	254	210	428	560	194	442	382	207	293	258	631	324
FBgn0001258	Ldh	395	194	227	209	434	219	294	256	347	378	804	1005	459	891	620	685	3605	6080	5174	3249	359	351	802	986
FBgn0001259	in	53	1	60	56	32	0	29	15	59	76	95	53	30	67	111	118	50	94	154	114	33	32	103	22
FBgn0001263	inaD	31209	16592	26527	24048	23128	15001	63569	56011	31665	23847	32928	30059	37058	25739	53533	56063	20545	28250	46403	41288	40307	31616	38917	27092
FBgn0001269	inv	230	130	99	99	259	54	219	219	160	121	133	173	173	104	153	146	167	174	183	115	182	157	145	109
FBgn0001276	ix	494	301	177	188	752	235	493	481	440	296	380	589	412	320	320	384	238	453	283	249	444	394	294	185
FBgn0001280	janA	675	514	427	439	1484	1264	1293	1419	544	370	471	565	505	494	564	585	369	617	364	370	421	358	514	308
FBgn0001281	janB	0	0	0	0	4	0	2	0	0	0	1	0	0	0	0	0	0	0	1	0	2	1	0	0
FBgn0001285	Jon44E	5	2	4	3	5	0	3	5	11	8	5	1	13	0	6	3	6	3	4	5	3	1	5	2
FBgn0001291	Jra	1954	1330	1113	1006	2487	1449	1984	1949	1291	1031	1532	1894	1782	1614	1742	1822	1120	2052	1275	1113	1889	1737	1598	1238
FBgn0001296	kar	1707	765	1554	1316	1321	974	1803	1301	1622	1490	2044	2462	1306	759	1671	1766	1165	1510	2438	2190	1730	1397	2243	1320
FBgn0001297	kay	6068	2795	5568	5095	6824	2823	7193	4763	3664	2597	4712	4901	5206	2853	5684	5700	3401	5486	4717	3783	4904	3552	5315	3555
FBgn0001301	kel	1233	475	967	689	1203	624	1056	694	634	512	763	740	984	469	963	1080	501	1029	1091	659	1172	843	945	350
FBgn0001308	Khc	7258	4019	4015	3533	8655	3752	6626	5733	4753	3820	4610	4506	5694	4099	5570	5833	3485	6000	5464	4514	5849	5569	5428	3441
FBgn0001311	kkv	536	134	91	24	119	0	262	32	82	620	177	158	60	51	98	73	205	79	1622	317	123	287	40	44
FBgn0001313	kl-2	0	0	0	0	0	0	0	0	0	0	0	0	0	0	0	0	0	0	0	0	0	0	0	0
FBgn0001316	klar	5858	2209	3621	3195	6555	1839	5309	3122	4599	2997	4073	3905	4038	2009	3390	3748	3111	5033	4079	3254	5192	4302	3748	2449
FBgn0001319	kn	827	399	337	305	860	404	788	473	484	343	465	530	638	380	420	507	353	716	428	262	748	517	354	245
FBgn0001320	kni	513	236	254	224	795	153	517	343	587	443	576	765	635	562	588	530	464	728	538	347	420	410	482	323
FBgn0001321	knk	136	65	74	45	88	69	119	65	28	84	80	78	91	57	110	84	88	79	323	73	89	101	130	79
FBgn0001323	knrl	697	288	330	273	971	346	634	470	810	617	678	1154	794	494	626	498	603	960	712	332	684	447	578	364
FBgn0001324	kto	2251	952	1186	915	2840	778	2059	1339	2004	1280	1333	1436	2176	1196	1602	1714	1127	2330	1489	1214	1921	1870	1233	789
FBgn0001325	Kr	211	105	109	91	281	102	202	107	118	82	115	115	193	89	109	137	101	173	105	43	227	129	78	52
FBgn0001330	kz	650	261	308	255	716	304	501	397	401	333	268	324	430	312	351	453	239	631	327	245	471	395	324	173
FBgn0001341	Mybbp1A	504	284	279	236	831	415	529	446	440	248	257	277	523	353	411	428	368	566	342	294	475	350	339	172
FBgn0001404	egh	7015	2406	2644	2307	7646	2444	6383	3629	4544	2666	4191	4817	5015	2919	3915	4413	3398	5794	4064	2483	6247	4021	3655	2712
FBgn0001491	l(1)10Bb	562	589	519	449	560	571	655	645	223	362	492	619	556	469	526	534	354	539	541	353	668	365	490	348
FBgn0001565	Hlc	3893	1971	3928	3204	5734	3170	6077	5959	2795	2153	3885	4239	2839	2394	4141	4795	1925	3398	3030	3247	3565	2879	4717	2865
FBgn0001612	Grip91	996	437	613	508	939	579	948	653	548	383	595	579	745	388	640	663	428	842	671	511	946	581	521	270
FBgn0001624	dlg1	22955	9024	9969	9030	29997	10201	22048	13654	18229	11896	17004	21437	16178	7852	12090	13678	10912	14832	13507	7539	23939	14795	11886	9244
FBgn0001941	ifc	1056	586	840	723	1168	565	1146	890	669	504	826	898	943	622	1065	1127	526	1008	882	664	938	657	872	484
FBgn0001942	eIF4A	41729	23401	40622	35733	42954	22499	46770	37279	25876	24789	40069	47542	36457	28279	50557	55529	25613	47414	39572	32401	43967	34773	52884	30538
FBgn0001961	Arpc1	4800	2790	3131	3101	5055	3396	5293	4792	3294	2578	3557	3838	4054	3469	3964	4420	2442	4407	3287	3120	4135	3876	3824	2392
FBgn0001965	Sos	5129	2230	2582	2124	5415	1915	4072	2783	3651	2279	2568	2340	4109	2185	3254	3532	2230	4404	2927	2378	3996	3770	2440	1577
FBgn0001967	NimC3	8	0	5	3	2	0	1	0	2	2	9	0	1	0	7	4	4	0	10	14	2	3	8	5
FBgn0001970	Pgant35A	969	636	608	579	1155	524	1054	1084	929	925	653	784	917	757	832	850	513	954	585	612	894	818	651	419
FBgn0001977	CIAPIN1	1021	612	634	569	1171	713	907	788	753	718	648	835	810	593	884	899	522	1014	707	521	829	741	735	434
FBgn0001978	stc	2172	1126	1146	1164	3525	1327	2265	1905	1911	1400	1276	1278	1981	1386	1633	1767	1520	2430	1673	1374	2010	1915	1468	916
FBgn0001983	wor	0	0	1	0	0	0	0	0	0	0	0	0	0	0	0	0	0	0	0	0	0	0	0	0
FBgn0001986	Mtr4	757	368	572	475	1051	649	908	562	568	478	453	370	646	419	642	644	349	717	495	491	739	686	619	341
FBgn0001987	Gli	351	193	563	459	343	97	332	272	337	344	389	398	358	241	661	586	289	446	749	454	401	373	707	405
FBgn0001989	ND-B17	4955	3792	3303	3123	4470	5557	7033	8244	3124	2899	6014	6725	4483	3765	4958	5317	3102	4371	5064	4633	4256	3798	4645	3453
FBgn0001990	wek	364	258	258	190	422	193	344	306	237	179	261	309	372	212	377	415	213	436	349	203	348	234	352	188
FBgn0001991	Ca-alpha1D	16294	6155	6257	6091	17587	5881	11387	6685	11801	7767	10824	12817	10489	5045	5053	6506	6937	11873	6591	3834	9576	7042	4096	3259
FBgn0001992	Cyp303a1	1	0	3	1	4	0	2	6	11	10	9	24	0	2	0	3	4	0	2	0	2	0	0	0
FBgn0001994	crp	11347	4940	4145	3769	16840	6795	10903	7201	8443	4687	6838	6469	9274	4643	6304	7011	5480	8972	5424	3420	10504	7079	5561	4299
FBgn0001995	mRpL4	1029	664	527	519	1284	1086	1193	1336	736	674	870	1076	1058	831	868	917	725	925	956	694	1052	871	735	569
FBgn0002021	l(2)37Bb	1005	597	555	451	1400	748	1273	1004	844	688	868	859	1149	859	1277	1462	705	1155	1165	869	966	777	877	543
FBgn0002022	Catsup	737	484	1125	1133	678	424	1035	853	644	593	765	809	1204	743	1566	1711	563	1128	1150	1026	856	683	1468	831
FBgn0002023	Lim3	1284	526	443	392	1241	404	950	814	834	552	727	758	972	533	565	675	505	968	631	420	946	737	423	326
FBgn0002031	Phb1	2772	1618	1585	1545	3959	2675	3953	3849	2064	1646	3196	3525	3095	2431	3336	3540	2330	3521	3730	3037	3152	2624	3466	2156
FBgn0002036	CG10561	2398	1556	1664	1518	2703	1963	3326	3113	1486	1371	2028	1953	1682	1441	1954	2223	1042	1804	1784	1489	2207	1890	2031	1273
FBgn0002044	swm	5275	2217	2533	2153	5728	2141	4045	3068	3186	2334	2926	3259	3966	2318	3324	3631	2148	4284	3196	2288	3912	3130	2715	1813
FBgn0002069	AspRS	1467	908	1391	1435	1692	874	1345	1401	1339	1318	1385	1322	1217	1195	1650	1705	1002	1969	1694	1330	1141	1105	2033	1342
FBgn0002121	l(2)gl	773	494	1168	893	919	455	906	483	638	487	849	774	845	383	1240	1099	603	1029	1098	512	882	462	1177	486
FBgn0002174	CG5504	2824	2135	1630	1578	3198	2255	2816	2985	1640	1622	1709	2136	2142	1829	2104	2397	1589	2316	1996	1941	2984	3264	3297	2159
FBgn0002183	dre4	1941	912	950	871	2813	1266	1547	1352	1512	1141	1109	1212	1643	1239	1249	1419	1011	1715	990	836	1527	1503	1132	709
FBgn0002283	l(3)73Ah	1426	813	594	550	2102	1136	1315	1408	994	713	922	1031	1238	965	803	937	830	1262	791	547	1307	945	759	524
FBgn0002284	Prosbeta6	3205	1775	1287	1192	1739	1943	2047	1929	1107	2336	1408	1626	1349	1369	1853	1879	1058	1844	2293	1254	1294	1751	1986	1195
FBgn0002306	sas	620	235	816	692	505	136	484	336	558	525	633	688	648	347	1225	1022	480	750	977	660	471	413	806	405
FBgn0002354	l(3)87Df	454	254	298	266	601	331	512	411	295	252	399	454	404	289	361	396	285	347	386	245	492	307	367	193
FBgn0002413	dco	5807	2241	3067	2502	5941	2374	5065	2989	3384	2526	3387	3501	4936	2396	4174	4373	3039	4777	4609	2799	5352	3100	3227	1792
FBgn0002431	hyd	5235	2088	4105	3433	5457	2127	4347	2440	3203	2286	2540	2467	4254	1886	3986	4242	2228	4280	3388	2068	4464	3401	3204	1616
FBgn0002440	l(3)mbn	294	120	19	0	25	1	51	12	11	681	46	10	0	3	0	2	18	4	463	8	24	201	2	0
FBgn0002441	l(3)mbt	2978	1440	1372	1286	3922	1675	2601	1948	2260	1516	1731	1679	2321	1386	1992	2031	1564	2566	2004	1578	2103	1952	1546	1013
FBgn0002466	sti	26	19	16	10	27	1	15	15	21	10	8	22	15	8	16	14	8	24	11	12	12	16	10	13
FBgn0002521	pho	2580	1482	1877	1530	2791	1514	3275	1938	1292	1308	1931	2040	2442	1117	2023	2399	1232	2410	2022	876	2923	1467	1707	753
FBgn0002522	lab	133	63	69	55	209	27	127	154	70	52	93	137	112	60	90	113	58	148	138	84	91	81	75	27
FBgn0002524	lace	1511	804	934	792	1250	697	1394	998	1355	1049	980	982	1560	897	1440	1520	667	1355	1302	847	1461	982	1173	549
FBgn0002525	Lam	2367	1027	1063	924	2787	870	1661	1227	1461	956	1068	1340	1705	1028	1135	1278	957	1981	1022	815	1726	1569	1023	687
FBgn0002526	LanA	199	134	282	212	164	81	331	155	696	641	621	577	564	399	750	729	246	398	722	585	479	343	845	420
FBgn0002531	Lcp1	1	0	7	1	1	0	2	0	3	0	3	0	2	0	2	1	0	0	6	2	0	0	2	1
FBgn0002533	Lcp2	0	0	0	2	0	0	0	0	0	0	0	0	0	0	0	0	0	0	0	0	0	0	0	0
FBgn0002534	Lcp3	27	13	4	4	27	7	8	34	10	11	14	10	10	1	5	11	8	18	4	6	1	5	0	0
FBgn0002535	Lcp4	27	6	8	1	2	0	6	0	10	1	4	0	0	1	0	0	0	1	2	0	1	0	4	4
FBgn0002542	lds	110	23	100	90	104	16	60	23	122	107	83	75	59	58	78	57	57	73	60	42	55	38	55	27
FBgn0002543	robo2	665	229	303	308	908	288	696	374	502	328	346	198	466	239	441	485	332	572	391	322	468	544	355	239
FBgn0002552	lin	641	300	427	368	828	277	517	305	581	446	425	422	547	384	555	587	366	617	500	370	547	549	425	239
FBgn0002561	l(1)sc	0	0	0	0	0	0	1	0	0	0	0	0	0	0	0	0	0	0	0	0	0	0	0	0
FBgn0002562	Lsp1alpha	1	0	6	5	0	0	147	125	0	1	22	4	0	7	2	0	0	1	0	0	28	2	69	7
FBgn0002563	Lsp1beta	80	81	1830	2347	231	176	29961	29000	21	299	290	570	57	59	870	906	35	18	163	76	58	33	80	19
FBgn0002564	Lsp1gamma	16	24	5	4	0	0	6	2	0	10	20	8	24	15	11	17	19	8	69	4	25	14	2	4
FBgn0002565	Lsp2	51	81	3964	12754	13	31	3008	3206	649	2433	28842	17487	52	43	40303	12711	32	21	2022	6141	38	25	54536	11922
FBgn0002566	lt	2834	1398	1543	1375	2968	1401	2339	1622	1699	1312	1691	1788	1805	956	1706	1883	1198	2057	1594	800	2539	1472	1599	857
FBgn0002567	Rab32	6781	2741	5773	5072	3904	2521	10479	7996	4211	5108	8191	7301	3911	1715	7398	7219	3618	3670	13897	10384	8056	6323	10118	6065
FBgn0002569	Mal-A2	5	0	8	6	4	0	3	0	37	20	13	5	23	8	7	12	14	28	14	6	12	19	19	3
FBgn0002570	Mal-A1	93	40	124	160	57	39	62	52	181	180	76	47	110	82	210	125	62	120	134	103	93	94	197	99
FBgn0002571	Mal-A3	10	6	3	2	0	0	1	0	9	2	4	0	4	0	3	2	0	0	3	4	0	2	0	6
FBgn0002573	sens	22	1	20	17	13	0	20	17	21	7	17	23	13	4	35	27	8	3	28	28	11	11	27	11
FBgn0002576	lz	547	262	466	497	259	122	403	318	348	289	583	439	360	224	339	377	238	365	380	328	365	268	307	188
FBgn0002577	m	15	2	8	2	2	0	6	0	2	8	6	8	7	11	23	22	9	10	16	15	9	3	14	6
FBgn0002578	Kaz-m1	5	0	2	8	9	0	3	0	4	3	6	3	1	2	2	4	0	2	2	2	3	1	1	1
FBgn0002579	RpL36	11965	15068	22694	22680	15786	31067	23458	33448	8549	13712	23494	29428	17291	22990	27785	30311	15297	23898	22574	24189	18939	17338	35259	23713
FBgn0002590	RpS5a	13951	10218	22474	22114	19056	13737	18769	19988	10851	12417	21342	23328	13345	16304	25473	26757	10507	21790	20037	21074	12509	12838	32308	18534
FBgn0002592	E(spl)m2-BFM	59	50	51	29	35	0	38	22	11	24	46	101	32	25	43	57	46	33	53	63	60	37	43	32
FBgn0002593	RpLP1	22702	20470	40909	42245	29790	33950	27940	38085	16055	17893	33661	44836	22368	34152	37581	42593	20778	40144	27597	31722	21822	25534	48879	35143
FBgn0002609	E(spl)m3-HLH	55	43	74	59	30	62	73	43	20	34	44	76	21	15	34	31	27	13	52	21	70	52	54	60
FBgn0002622	RpS3	19227	15675	30796	28089	24709	21587	27855	32795	12674	15646	27931	28399	20769	25758	35117	36881	14913	29418	24311	28725	21115	20632	43394	28587
FBgn0002626	RpL32	16654	14367	25892	26221	29712	24305	18285	25393	14981	13490	22803	27185	15953	25367	27432	28721	15548	28588	16903	21445	14236	16080	34090	22380
FBgn0002629	E(spl)m4-BFM	0	1	0	0	14	0	1	0	0	0	1	0	0	0	0	0	0	0	0	0	0	0	1	0
FBgn0002631	E(spl)m5-HLH	1	0	0	0	12	0	6	8	0	0	1	0	0	0	0	1	0	0	0	0	0	0	0	0
FBgn0002632	E(spl)m6-BFM	5	6	1	4	21	31	7	5	3	2	8	0	0	3	1	3	2	4	2	2	4	1	0	4
FBgn0002633	E(spl)m7-HLH	7	3	7	1	14	0	3	3	0	3	14	7	2	4	3	0	0	2	4	8	2	4	1	1
FBgn0002638	Rcc1	1310	884	666	611	1858	974	1187	1265	900	805	871	794	1034	823	916	927	767	1375	861	681	1262	984	866	597
FBgn0002641	mal	415	232	302	276	575	229	462	396	331	355	293	358	474	282	417	400	261	621	407	295	373	353	388	181
FBgn0002643	mam	7481	2737	2906	2475	6022	2071	5078	2694	3985	2889	4340	4906	4681	1801	3321	3673	2707	4092	3735	1962	5437	3380	2787	1777
FBgn0002645	Map205	895	447	1176	956	2221	900	2712	1311	1088	786	1657	1447	2338	1063	2309	2626	1184	2344	2143	1028	2382	1407	1942	909
FBgn0002673	twe	98	51	49	37	129	96	64	52	53	44	40	55	101	48	45	45	43	83	22	21	108	78	55	35
FBgn0002707	mei-9	323	152	160	215	457	70	265	182	206	118	100	152	318	177	177	196	123	290	175	160	283	240	138	92
FBgn0002709	mei-218	5	19	11	4	12	52	8	4	5	3	8	20	10	22	6	12	4	13	6	3	8	3	7	0
FBgn0002715	mei-S332	211	124	76	58	210	151	124	149	95	77	93	96	134	125	68	91	79	149	102	64	153	142	63	41
FBgn0002716	mei-W68	80	18	25	20	78	87	90	38	34	17	39	13	54	30	35	24	34	59	55	33	72	34	33	26
FBgn0002719	Men	8804	4927	11612	10137	8686	4314	12900	12526	3937	3789	8253	7274	6603	4622	12092	11833	3639	7117	9395	9805	8002	7290	21340	8870
FBgn0002723	Met	3759	1135	1290	1162	4862	1057	3291	1539	2179	1106	2098	1846	2395	1224	1538	1794	1562	2308	1595	904	2694	1537	1229	858
FBgn0002732	E(spl)malpha-BFM	10	4	8	6	12	0	5	8	3	6	1	15	20	13	10	23	22	45	9	7	9	6	4	7
FBgn0002733	E(spl)mbeta-HLH	296	148	142	119	262	2	181	167	153	164	260	217	195	175	144	207	166	308	283	177	142	134	215	178
FBgn0002734	E(spl)mdelta-HLH	0	0	0	1	4	0	5	0	0	0	1	4	1	0	1	2	0	2	1	0	2	1	3	0
FBgn0002735	E(spl)mgamma-HLH	0	1	0	0	0	0	1	1	0	0	0	1	0	0	0	0	0	0	0	0	1	2	0	0
FBgn0002736	mago	599	522	460	450	1386	585	948	1015	457	391	475	436	550	555	566	633	327	737	446	362	645	575	548	355
FBgn0002772	Mlc1	8180	5669	8032	5372	7835	6188	7633	6250	6899	6489	14585	19874	5073	4006	4764	5788	6760	6712	28333	18182	9177	6832	8597	5762
FBgn0002773	Mlc2	23676	15411	27081	19427	24560	16993	26944	22373	15870	18169	39248	52921	12814	8902	14607	18615	15064	17700	75359	58773	26855	22948	30717	16892
FBgn0002774	mle	5261	2176	2447	2274	6392	2597	4770	3296	3467	2254	2729	2927	4103	2070	3424	3584	2481	4234	3328	2081	4536	3258	2519	1407
FBgn0002775	msl-3	991	558	381	347	1181	525	883	893	640	460	540	594	712	496	573	603	473	878	596	448	999	625	536	377
FBgn0002778	mnd	2043	1030	1156	1122	1368	528	1982	1353	652	576	877	870	1397	781	1497	1397	862	1513	1331	785	1110	710	930	552
FBgn0002780	mod	3120	1743	2385	2074	3529	1878	2920	2702	1667	1423	1865	1978	2137	1426	2547	2590	1465	2408	2300	1545	2383	1642	2917	1468
FBgn0002781	mod(mdg4)	8733	4333	3728	3416	10207	5210	7088	6316	5607	4105	4589	5264	6649	4543	4602	5804	3611	7168	4723	3766	6762	6580	4034	3041
FBgn0002783	mor	4079	2113	1967	1755	5611	1967	3473	2647	3070	2174	2294	2480	3624	2161	2650	2793	1891	3929	2259	1892	3748	3229	2081	1434
FBgn0002787	Rpn8	5952	3200	2009	1867	4580	2416	3388	3216	2754	4145	2575	2821	3038	2724	3146	3164	2287	3742	3983	2454	3497	3428	3056	1922
FBgn0002789	Mp20	6798	3250	4520	3842	6611	3828	5417	5483	3217	5493	5291	7472	3604	3077	3409	4084	2727	4442	4941	3783	6474	6101	6400	4511
FBgn0002791	mr	870	593	442	402	1574	724	848	731	715	497	492	615	633	432	550	589	455	732	507	383	765	544	445	299
FBgn0002838	ms(3)K81	0	0	0	0	0	0	0	0	0	0	0	0	0	0	0	0	0	0	0	0	0	0	0	0
FBgn0002842	sa	0	0	0	0	1	0	0	0	0	0	0	0	0	0	0	0	0	1	1	1	0	0	0	0
FBgn0002855	Acp26Aa	2	0	0	0	0	0	4	0	3	1	2	3	0	0	0	0	0	0	1	3	0	0	0	0
FBgn0002856	Acp26Ab	1	0	0	0	0	0	0	0	0	0	3	0	0	0	0	0	0	0	0	0	0	0	0	0
FBgn0002862	Mst87F	3	0	3	1	1	8	5	0	1	5	0	1	1	3	4	2	2	11	10	0	3	5	4	0
FBgn0002863	Acp95EF	1	0	1	0	1	0	2	0	0	1	0	0	3	0	0	0	3	4	2	0	5	4	2	0
FBgn0002865	Mst98Ca	6	0	0	0	4	0	5	0	0	7	5	0	0	0	0	2	0	0	8	0	0	0	0	0
FBgn0002868	MtnA	6652	8810	11155	10003	529	906	1379	2133	10353	11390	19506	29355	11799	11227	8593	9374	6941	11211	5674	5201	8338	6805	10416	6685
FBgn0002869	MtnB	3	1	3	2	2	0	0	6	8	1	0	1	4	2	3	1	6	6	9	14	10	1	1	1
FBgn0002872	mu2	535	248	225	194	661	235	405	354	445	321	225	280	414	230	244	297	304	599	287	193	414	330	189	112
FBgn0002873	mud	10	4	13	11	25	20	30	7	16	7	7	11	10	3	10	13	17	22	19	15	16	18	16	8
FBgn0002878	mus101	414	161	184	175	356	267	192	122	273	163	183	83	320	210	244	225	211	402	225	173	352	350	199	125
FBgn0002887	mus201	741	389	318	242	1082	628	582	547	760	537	380	525	624	417	449	461	509	690	406	254	579	492	319	214
FBgn0002891	PolZ1	475	207	221	220	703	466	392	312	500	369	251	254	497	391	297	366	416	774	397	308	421	435	236	143
FBgn0002899	mus301	58	36	47	13	71	32	64	65	34	54	43	35	58	59	57	60	33	72	82	26	90	55	36	21
FBgn0002901	mus304	198	77	88	71	221	101	147	111	99	107	90	129	138	82	105	99	64	113	102	67	129	133	69	47
FBgn0002905	PolQ	484	208	184	154	609	201	386	284	212	154	158	149	250	163	147	188	142	282	134	99	278	269	172	111
FBgn0002906	Blm	842	383	368	319	604	243	355	250	274	190	188	213	304	209	250	252	202	412	268	198	328	263	180	117
FBgn0002917	na	14305	5598	5032	4481	17592	6369	13038	8271	8734	6042	7727	8574	10638	5621	6428	7443	3753	6343	5444	3589	7968	6276	3914	2782
FBgn0002921	Atpalpha	192256	81288	92837	77215	180509	67709	188710	129874	107761	77982	140974	168138	133346	57378	120850	137875	85151	123554	166437	87671	181161	91168	105830	65013
FBgn0002922	nau	50	30	26	32	20	0	55	37	48	25	58	80	32	14	20	56	21	29	34	23	45	22	29	24
FBgn0002924	ncd	226	145	86	71	448	256	333	262	167	116	94	119	234	184	187	257	147	320	244	174	165	128	96	120
FBgn0002926	ndl	2	0	0	0	1	0	1	0	0	4	1	0	0	0	1	0	0	2	0	0	2	0	1	0
FBgn0002930	nec	2422	1606	4329	3660	2200	1212	3554	3810	6361	6639	4353	4382	3362	3081	8246	9163	2197	4756	5286	6497	1934	1937	8239	3905
FBgn0002931	net	50	38	65	38	70	96	82	31	50	50	47	70	75	81	103	111	54	106	81	58	61	43	62	23
FBgn0002932	neur	491	287	415	377	489	253	613	430	340	281	411	279	475	259	460	524	282	469	448	267	587	405	428	205
FBgn0002933	ng1	1	0	0	0	5	0	0	0	0	0	0	0	3	0	0	1	0	0	2	0	0	0	0	0
FBgn0002936	ninaA	3497	2872	5488	6058	3396	4801	15606	17054	6209	5948	10558	10356	4870	5549	8390	9602	3506	5294	7708	6369	5271	4347	9586	6985
FBgn0002937	ninaB	2362	1140	2887	3044	1465	1384	5601	3523	1839	1684	3851	3953	2363	1172	6144	6097	1636	2863	4736	4532	2635	1942	6007	3769
FBgn0002938	ninaC	107103	51594	110086	91352	60695	37612	148759	123084	61598	59470	103056	83744	98882	49373	166644	181371	54468	81448	206385	146705	115320	78462	113376	71679
FBgn0002939	ninaD	264	100	332	289	18	11	219	173	66	162	172	191	75	44	514	428	28	37	260	164	242	189	1203	541
FBgn0002940	ninaE	758072	518534	707877	648744	525274	373739	1387737	1414979	563812	576367	892705	973533	1313623	971177	1296746	1430207	407843	939100	762399	682457	1197558	1020881	948702	678224
FBgn0002941	slou	716	269	153	124	841	463	445	489	370	309	290	280	401	287	207	256	240	418	227	221	412	439	168	139
FBgn0002945	nkd	1606	438	794	633	1122	336	863	550	813	518	915	882	1076	479	981	1052	566	1074	912	565	1023	796	816	406
FBgn0002948	nod	242	140	83	66	360	156	183	204	159	184	101	145	238	161	167	180	168	324	119	92	210	222	123	88
FBgn0002962	nos	1	0	15	8	18	0	1	0	2	0	0	0	0	3	0	0	0	1	0	0	1	0	0	0
FBgn0002973	numb	3286	1618	2892	2305	2864	1404	4349	2625	1922	1487	2628	2493	2260	1154	2806	2962	1175	2293	2817	1809	3519	2269	2866	1524
FBgn0002985	odd	109	55	59	43	122	38	70	58	68	89	55	96	89	51	95	93	47	105	84	55	86	87	94	53
FBgn0002989	okr	264	109	142	113	480	114	262	186	191	164	160	162	241	155	233	225	161	229	197	158	215	191	197	74
FBgn0003002	opa	197	98	88	83	180	111	153	148	146	91	137	160	160	101	145	135	91	243	148	81	167	150	140	96
FBgn0003008	or	778	484	510	418	672	678	870	729	374	338	571	677	506	374	563	569	399	564	494	348	519	432	506	316
FBgn0003009	ord	0	0	0	0	3	0	0	0	0	0	0	0	0	0	1	0	1	1	0	0	0	0	0	0
FBgn0003011	ort	1013	551	494	403	675	373	625	488	690	663	733	957	746	525	630	677	436	772	751	409	1187	819	901	571
FBgn0003015	osk	0	0	3	2	0	0	0	0	0	0	0	0	0	0	0	0	0	0	0	0	0	0	0	0
FBgn0003016	osp	4113	1420	2191	2012	3174	793	3523	2145	2095	1432	2368	2234	2880	1422	2951	3223	1757	2586	2805	2084	3061	2098	2237	1385
FBgn0003023	otu	20	7	27	9	23	2	26	8	16	9	16	8	6	3	5	10	2	19	7	8	10	2	18	2
FBgn0003028	ovo	336	223	327	278	291	189	450	243	217	195	542	763	428	178	530	453	239	404	467	257	440	213	433	348
FBgn0003034	SP	1	0	0	0	2	0	0	4	0	0	0	0	0	0	0	0	0	0	2	0	0	0	0	0
FBgn0003041	pbl	668	333	444	350	490	255	630	487	365	265	416	395	460	258	463	454	291	462	472	272	458	398	431	249
FBgn0003042	Pc	1674	905	749	640	1942	765	1575	1257	1087	821	1060	1218	1308	683	1038	1229	744	1492	1159	674	1854	1244	927	578
FBgn0003044	Pcl	1715	733	808	675	1905	605	1378	878	1075	776	878	882	1680	883	1126	1120	593	1275	939	597	1832	1283	847	539
FBgn0003046	Pcp	10	14	4	13	22	21	10	13	17	5	17	23	4	11	6	7	17	10	25	24	24	9	16	4
FBgn0003048	pcx	1895	778	1244	1009	1866	546	1454	805	1670	969	1205	1206	1530	666	1327	1371	1015	1383	1353	786	1550	1131	961	588
FBgn0003053	peb	3229	1506	1816	1665	2252	731	4312	2775	2159	1600	2579	2705	2678	1341	2524	3252	1474	2508	2140	1884	3074	2230	2011	1824
FBgn0003057	CG10598	0	0	2	0	0	0	2	0	0	0	0	0	1	0	0	0	1	0	0	0	0	0	0	0
FBgn0003060	CG9757	72	49	16	4	158	69	19	11	139	27	15	17	368	616	15	20	317	653	76	53	43	11	23	30
FBgn0003062	Fib	707	496	537	559	1556	728	858	929	524	560	647	745	751	805	772	787	814	1295	619	626	661	711	1332	857
FBgn0003065	CG2150	39	16	4	6	37	0	25	11	1	13	10	3	6	6	0	2	14	12	43	0	3	5	11	8
FBgn0003068	per	2655	1243	2124	2162	2540	801	1579	1233	2366	1560	1387	1541	2146	1452	1006	1223	1912	3482	2770	2658	1460	1259	1170	969
FBgn0003071	Pfk	13097	6427	8556	7246	10719	4949	13441	9949	6051	5591	10086	10389	10782	5902	12659	13429	5695	10375	13407	11145	9995	8186	9434	5616
FBgn0003074	Pgi	11120	5578	10492	10437	10610	4595	11242	10224	7027	6709	10693	9760	9573	6788	18200	17923	6925	12154	16172	14463	7961	7385	12710	6439
FBgn0003076	Pgm1	4936	3410	8774	9393	5556	4188	7238	7764	6105	9034	10731	9672	4450	3991	12537	12049	4160	6129	8862	10452	4362	3601	12751	5590
FBgn0003079	Raf	2416	1140	1210	954	2934	1311	2117	1860	1538	1063	1266	1496	1954	1029	1459	1658	1024	1932	1463	967	2260	1857	1208	820
FBgn0003082	phr	71	41	53	32	110	139	129	104	55	45	61	52	103	93	56	68	77	146	72	79	78	99	60	40
FBgn0003086	Pig1	0	0	0	2	0	0	0	0	0	1	0	0	0	0	0	0	0	2	0	0	2	0	0	0
FBgn0003087	pim	6	2	4	1	9	0	10	7	2	2	5	3	7	0	4	2	1	15	2	8	14	11	7	0
FBgn0003089	pip	37	26	24	10	39	15	63	21	13	16	26	33	12	20	23	20	46	19	134	27	20	15	20	14
FBgn0003090	pk	998	438	524	484	767	297	784	564	491	427	578	574	708	350	560	561	338	621	630	562	477	430	399	307
FBgn0003091	Pkc53E	12067	4818	5627	4971	23327	7931	19690	13871	10951	8379	10701	12229	8644	4309	7624	8993	4499	7516	6425	3375	13101	7255	7012	5137
FBgn0003093	Pkc98E	26063	12181	8866	7826	32502	12799	21738	16369	16619	12038	15326	21599	20225	11723	11648	14282	14436	22086	13484	7872	23149	14093	9551	7933
FBgn0003114	plu	6	4	3	2	1	49	27	45	14	8	29	19	0	0	1	0	0	0	1	0	0	0	0	0
FBgn0003116	pn	891	543	675	665	1122	547	1298	1210	495	442	753	726	797	550	1158	1215	510	800	785	685	725	542	818	504
FBgn0003117	pnr	43	16	38	28	15	0	43	19	49	44	47	32	59	39	85	81	16	38	50	47	45	34	89	35
FBgn0003118	pnt	371	170	335	212	339	133	405	201	272	186	268	232	410	257	438	408	245	484	470	268	386	201	427	285
FBgn0003124	polo	5	6	14	9	12	0	5	0	4	7	6	6	5	2	2	3	11	8	9	3	7	4	5	0
FBgn0003129	Poxm	17	14	28	14	10	0	40	3	16	20	23	27	14	6	24	37	22	32	38	31	37	21	22	4
FBgn0003130	Poxn	272	178	69	69	343	131	160	178	123	113	75	100	171	107	71	81	108	161	75	47	127	111	59	63
FBgn0003132	Pp1-13C	47	6	4	6	45	7	36	1	22	14	13	9	21	1	13	8	12	8	15	2	19	13	2	2
FBgn0003134	Pp1alpha-96A	7663	3214	4219	3265	9686	3278	7084	4392	5265	4223	7054	7750	6501	3609	8458	8678	3846	6646	5466	3424	6644	3889	6326	3206
FBgn0003137	Ppn	1017	408	1661	1284	748	298	1980	792	5462	4665	2396	2113	3646	3009	4561	5255	1052	3146	2557	2517	3200	3135	5683	3183
FBgn0003139	PpV	1327	645	883	775	1368	692	1424	1158	750	596	816	933	1023	576	967	1107	594	1082	992	663	1197	907	958	499
FBgn0003140	PpY-55A	1	0	0	0	0	0	0	0	0	0	0	0	0	0	0	0	1	0	0	0	0	0	2	0
FBgn0003141	pr	2024	860	1124	947	1036	907	1929	1956	950	1701	2484	2615	1452	935	2079	2147	1037	1315	3954	1953	1130	884	1167	764
FBgn0003145	prd	2	0	2	0	5	0	7	8	4	1	1	8	12	0	6	3	1	2	6	1	0	1	3	3
FBgn0003149	Prm	8084	4291	10126	6759	6027	2864	6538	4107	5516	4848	11931	13826	5238	2624	6174	7087	6080	6068	27616	21067	8403	6916	10802	6228
FBgn0003159	CG2841	1392	638	1198	1025	1455	403	1515	911	1119	710	1648	1592	1454	694	1799	1758	803	1441	1917	1322	1447	1441	1667	910
FBgn0003162	Pu	5274	2422	4259	3369	2373	1758	5114	4272	1968	5508	8335	7583	3050	1702	6944	6208	3276	3680	11084	6453	5470	2765	6036	3122
FBgn0003165	pum	28419	11560	7863	6893	32440	10479	20178	12390	20767	15891	18307	27701	21881	12906	11970	14028	16184	26133	12744	8167	21872	13348	9553	7711
FBgn0003169	put	1983	1297	2091	1752	2245	1056	2212	1478	931	1140	1536	1556	1714	914	1950	2072	899	1863	1844	1043	2597	1488	1825	842
FBgn0003174	pwn	184	74	115	116	143	9	228	136	91	80	195	208	157	89	182	209	82	186	330	218	127	134	143	117
FBgn0003175	px	7850	3207	3314	3096	8298	3200	6083	4222	4504	3153	3862	4112	5895	3027	4870	5208	3290	5428	3770	2703	5636	4137	3449	2388
FBgn0003187	qua	38	19	22	17	44	37	31	20	18	12	11	14	27	17	22	9	23	49	32	21	24	21	17	13
FBgn0003189	r	969	452	709	575	1090	672	701	482	973	970	467	342	908	702	1075	942	532	1287	561	575	495	532	680	392
FBgn0003204	ras	5058	3017	3654	3529	4673	2524	4736	4244	2516	2405	3758	3455	3524	2227	4036	4497	2148	3551	4812	3528	4390	3788	4292	2630
FBgn0003205	Ras85D	3507	2079	1964	1746	4325	2032	3301	2773	2284	1865	2195	2276	3415	2015	2797	3289	1731	3212	2560	1732	3896	2757	2437	1346
FBgn0003206	Ras64B	1858	1093	1334	1131	2161	1247	1758	1506	1190	946	1550	1635	1472	945	1291	1522	1079	1688	1495	997	1777	1162	1233	762
FBgn0003209	raw	3713	1737	2113	1686	6274	2067	3577	2603	2611	1963	2460	2459	3322	2322	2705	2872	2113	4233	2283	1841	2461	2467	2433	1547
FBgn0003210	rb	3010	1567	2030	1752	6646	2502	4318	3312	1950	1459	1949	2220	3012	2329	2567	2839	2123	3458	2125	1713	3330	2560	2413	1354
FBgn0003218	rdgB	11984	5409	8112	7072	11181	5030	14400	8027	6127	6650	11270	11725	10262	4634	10265	11462	6144	9999	10989	5534	14105	6731	8715	5205
FBgn0003227	rec	52	32	30	22	147	41	73	71	16	21	34	66	43	18	36	37	38	55	49	23	70	48	47	21
FBgn0003231	ref(2)P	9527	4637	5642	4945	12506	5610	8966	7489	7223	6146	6926	7361	9321	6700	10752	11751	6566	12112	9116	7182	8788	7617	9540	6225
FBgn0003248	Rh2	1589	1389	6414	6028	627	467	6680	5532	3102	2901	3131	3321	4204	3196	6110	5949	2125	4167	3606	2598	4116	2156	7774	5107
FBgn0003249	Rh3	25889	17088	23282	23009	24646	22683	51908	53315	19959	16527	28831	24991	26863	23325	28402	31703	15137	25920	28877	23380	55529	47792	45056	31944
FBgn0003250	Rh4	30292	25380	31332	28302	30525	33912	77766	78097	25618	27518	48080	45631	55921	49996	51739	57188	21284	47623	37585	33347	28582	26859	26121	16551
FBgn0003254	rib	26	22	14	17	28	0	24	19	18	9	33	37	27	9	29	42	19	24	47	33	35	17	16	30
FBgn0003255	rk	651	310	232	232	552	187	360	284	306	239	267	217	495	241	298	334	317	452	324	263	397	363	282	197
FBgn0003256	rl	2220	1468	1483	1206	1505	868	1657	787	768	933	1476	1522	1459	550	1403	1560	712	1506	1375	565	2546	1197	1570	594
FBgn0003257	r-l	276	155	181	189	449	346	304	274	198	214	197	188	286	198	286	272	166	404	240	225	208	173	193	119
FBgn0003261	Rm62	34329	18697	20973	17480	41688	16227	30445	24468	22499	15942	21852	28465	29420	18969	23439	26135	18688	32857	21318	15662	29430	22341	22017	15040
FBgn0003267	ro	24	10	2	9	10	0	6	1	18	13	13	4	10	18	5	11	13	11	7	8	8	2	3	9
FBgn0003268	rod	265	132	179	132	266	95	146	98	156	135	114	72	176	126	113	121	104	215	79	93	202	177	103	48
FBgn0003270	amos	0	0	1	1	1	0	0	0	4	2	3	0	0	0	0	0	0	0	2	0	2	3	2	2
FBgn0003274	RpLP2	10371	21054	33816	40361	13933	31146	22684	34044	6796	14959	23084	26499	15991	26099	31236	35046	15095	28023	25362	27402	15475	17599	39044	26719
FBgn0003275	Polr2F	579	736	446	402	885	807	843	767	384	527	641	950	809	814	587	639	579	868	455	412	763	758	778	460
FBgn0003277	Polr2A	2231	829	1640	1309	2573	864	1984	1160	1452	984	1357	1305	1838	1137	1952	2109	893	2084	1706	1377	1954	1832	1651	932
FBgn0003278	Polr1B	365	149	234	192	515	281	311	253	303	170	227	198	286	162	236	228	137	313	230	171	231	210	246	79
FBgn0003279	RpL4	37374	26490	46261	49890	53943	38252	43316	50806	37182	32411	37792	37562	33259	39733	56704	62102	24805	51587	38150	45646	29234	36110	64099	38953
FBgn0003285	rst	725	290	331	282	1161	509	885	545	655	346	550	585	587	355	395	423	391	620	525	248	639	476	351	190
FBgn0003292	rt	458	220	243	175	516	408	451	303	300	238	249	332	389	206	274	291	352	503	357	248	498	305	246	186
FBgn0003295	ru	504	177	193	145	411	148	407	244	188	158	293	314	331	216	264	320	214	374	336	223	313	235	166	143
FBgn0003300	run	242	125	89	68	454	56	223	201	171	115	144	207	220	153	124	150	138	290	124	109	195	125	82	59
FBgn0003301	rut	11341	4299	5877	5101	11176	3829	9061	5168	12398	10499	9315	10808	9504	3825	5913	6341	4545	8590	6280	3565	8100	5879	3922	2370
FBgn0003302	rux	832	511	313	313	984	572	716	622	539	416	529	613	643	544	382	425	417	738	449	283	783	560	372	231
FBgn0003308	ry	1043	513	1390	1121	1118	448	1759	1213	765	646	1241	1085	961	766	2263	2205	774	1412	1259	1057	554	492	1932	580
FBgn0003310	S	1417	622	1194	987	1352	595	1520	888	1101	603	973	1101	1178	602	1180	1231	704	1198	1244	756	1434	946	995	670
FBgn0003312	sad	16	19	15	20	10	0	13	6	3	6	9	17	24	13	17	14	12	30	18	4	13	12	14	11
FBgn0003317	sax	1641	681	1013	910	1491	649	1557	987	1075	873	1052	1034	1333	724	1211	1237	766	1164	1086	818	1500	1108	1065	579
FBgn0003319	Sb	69	27	32	31	18	34	82	42	29	15	34	67	25	12	39	48	11	18	73	38	24	28	12	13
FBgn0003321	sbr	10862	4864	3466	3133	14025	5097	8344	6482	7482	4967	5737	7419	7298	4294	4209	5499	4500	7907	4118	2535	7855	5930	3549	3230
FBgn0003326	sca	2827	1130	1045	891	2351	644	1540	1058	1325	935	986	1225	1647	1004	1162	1287	990	1781	1173	773	1644	1403	805	524
FBgn0003330	Sce	1248	835	551	502	1921	845	1243	1085	881	704	758	838	1328	1000	915	949	702	1226	684	654	1003	948	626	477
FBgn0003334	Scm	2450	1239	1788	1448	2707	918	2333	1395	1645	1127	1297	1183	2314	1244	1945	2202	993	2154	1743	1306	2444	2059	1487	863
FBgn0003339	Scr	466	201	349	280	619	231	510	236	293	315	324	412	446	213	468	343	321	494	449	299	446	292	427	203
FBgn0003345	sd	8409	3573	3317	2865	11482	3435	7155	4644	5568	3196	4885	5694	7496	3964	4678	5079	4994	7630	5240	2960	5358	3325	2837	2177
FBgn0003346	RanGAP	526	287	325	266	553	277	390	379	542	463	458	496	548	431	494	445	465	566	362	336	427	360	353	226
FBgn0003353	sei	3147	1401	1383	1186	3653	2098	2675	2004	2067	1432	1772	2021	2210	1302	1709	1913	1417	2401	1779	1110	2717	2225	1512	993
FBgn0003356	Jon99Cii	2	0	4	1	5	0	1	2	15	36	2	4	4	0	0	0	0	0	5	10	4	0	3	11
FBgn0003357	Jon99Ciii	1	2	6	2	3	0	7	4	8	6	1	0	2	1	0	2	1	9	5	11	4	0	3	2
FBgn0003358	Jon99Ci	1	0	0	0	0	0	4	3	1	3	4	7	7	3	2	0	5	0	10	4	2	1	10	2
FBgn0003360	sesB	83131	49685	79761	65427	71288	56512	121993	112853	46200	41327	111155	137315	83726	57159	125969	147631	58481	83671	153671	114787	97602	59512	101839	73721
FBgn0003366	sev	2795	1508	2539	2399	3627	1462	3189	2007	3142	1946	1492	1393	2798	2048	3683	3390	1917	3833	2128	2148	2156	2047	2384	1385
FBgn0003371	sgg	27159	9826	13707	11811	24251	5692	23397	11243	18028	10441	16735	16840	26408	12406	20919	23243	13337	22454	19061	11089	27202	14539	15691	10201
FBgn0003372	Sgs1	42	25	11	7	41	11	45	24	17	15	35	37	63	6	20	49	34	91	55	34	16	11	7	4
FBgn0003373	Sgs3	1	0	0	0	0	0	0	0	0	0	1	0	0	0	0	0	0	3	0	0	0	1	1	4
FBgn0003374	Sgs4	21	2	2	3	13	0	4	8	0	0	4	3	0	2	3	7	4	1	0	0	5	2	2	0
FBgn0003375	Sgs5	0	3	0	0	0	0	1	0	0	1	0	3	0	0	0	0	0	0	0	0	0	0	0	0
FBgn0003377	Sgs7	0	0	2	0	0	0	0	0	0	2	0	0	1	0	2	0	2	0	0	0	0	1	0	0
FBgn0003378	Sgs8	0	0	0	0	0	0	0	0	0	0	0	0	0	0	0	0	0	0	0	0	0	0	0	0
FBgn0003380	Sh	97360	39178	20132	18049	126150	41010	80277	50216	68658	49389	70815	114758	80877	39596	35561	46379	62393	84268	49764	19183	84063	37017	25210	23839
FBgn0003382	sha	1	0	2	2	1	0	3	7	4	0	0	0	2	0	0	2	0	6	3	3	5	0	1	0
FBgn0003386	Shaw	6765	2665	2418	1935	9402	2953	6393	3612	4383	2694	3621	4134	4841	1793	2916	3101	2372	3967	2989	1328	5300	2864	2041	1197
FBgn0003388	shd	17	14	36	26	5	0	7	19	0	7	10	4	23	6	87	84	13	33	40	28	27	13	48	24
FBgn0003390	shf	397	196	391	313	149	118	228	185	241	312	243	323	298	411	688	787	275	521	378	421	152	167	685	341
FBgn0003391	shg	2745	1464	2554	2243	2007	704	2962	2045	1711	1410	1917	1855	2983	1361	3149	3453	1179	2858	2376	1883	2765	1977	2073	1109
FBgn0003392	shi	36960	15183	18660	16060	40394	14440	38578	22297	23699	17082	24794	24946	30187	12645	23931	25917	15969	24456	29710	15679	36998	23396	19339	12349
FBgn0003396	shn	1960	650	1939	1481	2161	715	1920	1091	1370	1065	1453	1238	1716	833	1867	1902	1156	2048	1640	1200	1556	1261	1384	913
FBgn0003401	shu	2	10	8	5	12	0	9	5	8	23	14	14	10	9	2	5	7	2	17	5	8	2	8	3
FBgn0003410	sina	3456	1160	1202	1112	3077	1257	2375	1417	1981	1249	1657	1672	2123	1085	1711	1730	1377	2278	1843	1073	2577	1735	1362	873
FBgn0003411	sisA	0	0	0	1	4	0	0	0	0	0	1	0	0	0	3	0	0	0	5	33	0	0	0	0
FBgn0003415	skd	9842	2835	3899	3355	5750	1694	4919	2272	3339	2224	3665	3826	4811	1958	3181	3621	3077	4914	3343	1856	5008	3007	2239	1397
FBgn0003416	sl	384	236	434	321	424	138	452	246	195	210	257	172	389	151	428	474	214	426	374	228	429	322	341	107
FBgn0003423	slgA	17173	8247	10005	8771	19710	9869	21488	14347	9813	7225	9945	9814	13453	6590	13137	14710	7333	11733	14174	9540	17529	12462	11026	7216
FBgn0003429	slo	38115	17042	12325	11470	46517	17347	30426	16420	20107	14558	20646	29498	31156	14928	14486	17504	18243	30904	14719	7041	27887	15018	9290	7221
FBgn0003430	slp1	398	288	206	168	577	401	374	412	362	329	332	382	473	382	300	336	292	490	292	203	341	346	298	198
FBgn0003435	sm	21625	7140	8302	7039	18572	6411	15378	7420	8210	6758	10756	13054	13502	6175	8304	10137	7372	12188	8679	3717	16279	7710	6399	4412
FBgn0003444	smo	473	215	302	215	577	217	451	318	395	306	462	542	488	285	498	492	334	596	435	269	513	328	418	213
FBgn0003447	sn	4947	2955	4048	3847	4186	1974	6277	4300	2692	2699	8553	10174	4812	2247	5258	5361	3082	4605	7011	4309	5393	3014	4601	3125
FBgn0003448	sna	8	4	5	2	0	5	9	0	2	0	1	2	9	2	0	1	4	2	3	5	1	0	0	0
FBgn0003449	snf	1551	961	703	650	1880	1355	1475	1568	1252	874	1299	1772	1247	1054	1144	1027	870	1407	1144	839	1371	1129	1039	799
FBgn0003450	snk	5	0	0	0	0	0	0	0	0	0	0	0	0	0	1	2	0	1	0	3	0	0	1	2
FBgn0003459	stwl	336	155	281	243	573	157	395	267	331	292	221	249	478	336	421	477	246	457	282	154	448	315	326	214
FBgn0003460	so	961	457	702	608	707	330	1131	940	683	499	981	921	870	481	959	1106	492	888	941	808	943	736	853	555
FBgn0003462	Sod1	10784	9864	10441	10720	11724	14559	17790	17305	7069	8449	16935	18595	14940	12504	19824	19539	9792	14573	13086	13224	13466	11472	17710	11263
FBgn0003463	sog	3258	1607	2940	2708	3925	1770	5002	3133	2562	1808	3756	4267	4063	1891	3947	4111	2207	3681	3956	2491	3646	2252	3262	2340
FBgn0003464	sol	10774	5012	4820	4528	13321	6359	9113	7248	7065	5103	5087	4667	7934	5067	5672	6136	4514	8023	5264	4435	8194	7811	5055	3436
FBgn0003475	spir	9567	4142	5556	5273	9632	3769	8454	5844	6849	4982	6625	6373	6633	3459	5997	7116	3667	6931	6559	4741	8400	6582	6063	4070
FBgn0003479	spn-A	339	297	163	184	551	363	465	551	133	131	208	248	159	156	218	222	141	161	172	146	79	78	142	90
FBgn0003480	spn-B	94	46	48	56	135	59	116	84	75	73	83	84	145	87	136	114	56	156	118	72	97	82	64	45
FBgn0003482	spn-D	1	1	1	0	3	0	5	3	4	5	2	13	1	0	3	1	5	6	0	0	1	2	3	0
FBgn0003483	spn-E	75	35	46	52	88	21	94	70	76	45	86	52	52	28	54	76	42	72	58	26	82	44	48	26
FBgn0003486	spo	0	0	0	1	0	0	0	2	0	0	0	0	0	0	0	0	0	0	0	0	0	0	0	0
FBgn0003495	spz	802	554	695	528	1223	458	1105	997	631	517	868	1118	666	479	880	919	515	1101	924	688	819	686	987	724
FBgn0003499	sr	891	501	660	616	1229	549	1269	635	504	520	1002	806	1014	450	1082	1121	493	1074	785	391	742	491	843	543
FBgn0003502	Btk	1409	594	1062	838	1304	641	1080	665	672	523	668	715	971	438	1173	1071	596	1051	1056	563	1129	731	1112	557
FBgn0003507	srp	296	203	1091	739	198	8	481	389	178	358	887	686	357	420	1613	1531	270	746	843	788	167	167	1283	508
FBgn0003512	Sry-delta	978	690	536	465	1411	1006	832	968	693	623	557	660	969	711	752	756	428	923	563	612	880	969	684	469
FBgn0003513	ss	329	141	136	95	428	285	244	193	312	202	257	320	236	190	159	193	216	231	127	147	168	154	112	81
FBgn0003514	sqh	3953	2188	3097	2595	4146	2161	4971	4751	2488	2069	3470	3598	3285	2639	3850	4336	2072	3889	3848	3179	4144	3287	4012	2686
FBgn0003515	st	349	167	554	446	199	162	475	410	226	205	380	273	150	61	224	204	121	197	443	329	490	365	550	300
FBgn0003517	sta	31255	24771	41247	44113	42033	38082	30877	39387	25066	26728	33899	41648	32864	44058	43519	47462	26389	51589	32163	34895	26302	30147	48557	30133
FBgn0003520	stau	11825	5833	8096	7282	16382	7042	15038	9754	8787	5643	7699	8186	10825	7125	9809	11738	6153	9061	8558	5287	10126	7345	6240	4430
FBgn0003525	stg	61	16	48	28	20	5	32	31	11	19	27	24	39	25	47	34	37	40	39	14	41	19	29	32
FBgn0003527	stil	0	0	3	0	0	0	0	1	0	0	0	0	3	0	0	0	1	4	0	0	0	0	0	0
FBgn0003545	sub	4	1	9	0	1	0	1	0	0	3	2	1	0	0	0	0	2	2	4	0	0	3	0	0
FBgn0003557	Su(dx)	3846	1784	2523	2263	3928	1676	3844	2461	2663	1824	2371	2040	3207	1624	3313	3414	1969	3418	3471	2302	3583	2908	2871	1577
FBgn0003559	su(f)	2150	1175	1044	933	2719	1461	1776	1605	1487	1150	1361	1601	1697	1178	1266	1464	1117	1806	1436	849	1924	1485	1213	736
FBgn0003567	su(Hw)	1213	526	663	587	1472	518	892	733	725	527	683	750	942	555	799	812	651	1020	819	563	923	790	702	511
FBgn0003575	su(sable)	2854	1197	1596	1356	3106	999	2344	1786	1589	1105	1559	1687	2328	1138	1862	1924	1214	2032	1531	1258	1979	1598	1440	805
FBgn0003598	Su(var)3-7	1511	710	862	675	1979	833	1322	984	1009	646	820	772	1364	747	1016	1147	623	1432	873	680	1815	1508	994	617
FBgn0003607	Su(var)205	4089	3054	1944	1844	5198	3073	3514	4170	2969	2105	2494	3329	3420	2988	2504	2723	2250	4068	1989	1695	3637	2777	2377	1699
FBgn0003612	Su(var)2-10	3764	1646	1631	1540	4257	1744	3172	2097	2391	1706	1866	2075	2924	1640	2046	2410	1612	2905	1878	1346	2937	2484	1638	993
FBgn0003638	su(w[a])	28237	12267	7051	7119	31340	13681	17897	14468	19240	12295	11644	17170	20671	11649	9821	12015	12319	21444	9020	6409	15220	14376	6551	6989
FBgn0003651	svp	1384	641	1431	1122	1161	407	1205	725	774	702	1148	1006	1138	639	1432	1489	692	1291	1035	802	872	678	1495	725
FBgn0003654	sw	1988	936	920	771	2184	732	1667	1186	1459	1007	1114	1193	1580	922	1360	1533	822	1518	1374	928	1799	1495	1192	770
FBgn0003655	swa	2	2	11	3	27	14	2	11	12	2	10	7	4	19	16	7	42	200	81	130	5	7	2	1
FBgn0003656	sws	8337	3407	4409	3811	8736	2712	6844	4836	5337	3990	4943	5450	6933	3645	5913	6400	3940	7102	5982	4096	5778	4579	4401	2531
FBgn0003660	Syb	1589	1210	1602	1257	1687	860	1960	1885	1153	1160	2164	2481	1560	1576	2523	2571	1242	1926	2133	1559	1431	1115	2360	1348
FBgn0003676	CCT1	1860	1212	1303	1491	2395	1566	1633	1491	1234	1081	1100	1281	1518	1415	1286	1249	1151	1884	1027	858	1525	1552	1352	832
FBgn0003683	term	5	1	0	2	8	0	8	0	7	1	6	0	4	0	0	0	0	0	0	0	8	4	2	1
FBgn0003687	Tbp	546	287	259	209	863	502	514	466	348	330	314	360	476	344	370	410	312	574	346	314	467	382	315	234
FBgn0003701	thr	30	32	19	6	8	0	9	9	38	22	30	22	44	42	27	34	29	31	36	17	45	34	13	22
FBgn0003710	tipE	2646	1121	1297	1105	2545	1072	2445	1264	1536	1234	1571	1713	1976	886	1454	1610	974	1724	1636	872	2480	1756	1131	804
FBgn0003714	tko	611	765	522	464	867	1322	947	1257	507	735	1045	1581	838	847	715	955	703	929	878	617	825	605	782	558
FBgn0003716	tkv	1841	956	1562	1290	2154	822	1977	1320	1229	943	1328	1092	1769	882	1804	1933	945	1647	1755	1101	1773	1215	1543	772
FBgn0003719	tld	206	98	98	127	295	67	289	250	228	187	258	269	117	100	114	142	114	142	120	77	185	160	368	188
FBgn0003720	tll	1	0	0	0	0	0	0	0	0	0	0	0	0	0	0	0	0	0	1	1	0	0	1	0
FBgn0003721	Tm1	15842	9154	11258	9539	17577	11567	14955	12841	10713	9660	17232	20899	11536	7322	10762	13120	10505	12109	24937	20557	14541	11496	14079	9733
FBgn0003731	Egfr	1156	521	2428	2278	621	354	1408	976	929	909	1833	1743	1196	855	3005	2958	682	1705	1969	1691	931	814	2696	1047
FBgn0003733	tor	4	0	9	0	3	0	0	1	535	465	4	6	1	0	3	1	1	13	0	0	0	1	1	3
FBgn0003741	tra	1136	687	412	388	1824	967	824	919	853	640	746	1003	838	833	507	644	669	1070	523	404	931	788	476	390
FBgn0003742	tra2	1024	475	458	352	1424	556	906	838	662	528	641	747	838	637	642	706	560	1028	605	529	999	711	624	419
FBgn0003744	trc	4061	1845	2068	1825	3696	1210	3245	2302	2276	1803	2238	2279	3032	1596	2764	2918	1587	2771	2841	1764	3668	2518	2405	1377
FBgn0003747	Gr5a	17	3	9	2	16	0	14	1	6	13	9	3	20	19	9	10	2	7	13	4	13	2	6	5
FBgn0003748	Treh	14968	7968	11689	10709	19182	10541	19573	15242	8341	5807	9069	8269	10598	7255	15206	15592	9267	14432	11328	10018	11045	7878	12769	7089
FBgn0003751	trk	32	44	32	19	27	0	25	85	20	38	15	45	38	32	21	27	23	19	23	5	20	14	16	8
FBgn0003861	trp	79312	44255	74881	67661	110052	56544	167129	157645	85251	63461	102201	93671	102096	69635	162306	174029	71123	91555	145506	132482	126666	101250	140271	94640
FBgn0003862	trx	4569	1293	3168	2638	4520	1594	3799	1654	2637	1818	2411	2087	3497	1397	2856	3149	2116	3633	2827	1779	3870	2763	2006	1336
FBgn0003863	alphaTry	2	1	2	103	5	0	5	0	110	245	3	1	0	0	3	2	0	0	5	5	0	0	1	0
FBgn0003865	tsg	0	0	0	0	0	0	0	0	0	0	1	8	0	0	0	0	0	1	0	0	0	0	0	0
FBgn0003866	tsh	438	238	246	212	528	347	327	244	267	216	242	256	258	191	268	287	206	323	309	177	462	364	363	227
FBgn0003867	tsl	652	483	1163	1145	288	193	1097	1169	376	656	1629	1409	760	577	2554	2616	459	947	1542	1415	629	396	2338	992
FBgn0003870	ttk	1677	941	2286	1853	1977	802	3057	1662	1295	1178	2067	2172	2261	1036	2519	2898	1464	2753	2795	1710	2639	1606	2278	1299
FBgn0003882	tub	1374	776	1114	815	1769	559	1383	1421	981	795	1014	1257	1099	821	1320	1471	549	1348	1066	938	1298	1041	1276	667
FBgn0003884	alphaTub84B	42943	28579	29887	30051	50154	37685	54484	58990	29320	26889	38468	45625	37969	31456	38484	43065	24886	39496	42950	37076	44304	42750	36805	26035
FBgn0003885	alphaTub84D	6802	4195	3388	3322	7639	5846	7820	9249	3838	3452	5121	6047	5104	4101	5706	6533	2635	5279	5630	4887	6378	5738	5129	3627
FBgn0003886	alphaTub85E	11	4	15	15	6	0	13	16	12	18	155	206	16	8	8	8	18	39	31	37	62	35	125	69
FBgn0003889	betaTub85D	137	77	30	26	138	2	74	46	106	70	107	159	84	67	55	46	47	67	57	45	87	75	61	59
FBgn0003890	betaTub97EF	3501	2306	3602	3508	2314	1812	4953	5448	1982	2183	4195	4112	2625	2225	4923	4938	1763	2520	4386	4247	2934	2694	4580	2891
FBgn0003891	tud	10789	5125	9957	8404	14195	5588	11846	7320	6327	5419	6871	8833	10495	6112	9611	10672	6818	11810	7969	5160	11216	8058	7567	4863
FBgn0003892	ptc	154	68	137	117	110	31	98	50	100	59	121	99	146	74	158	170	56	118	163	75	118	84	134	48
FBgn0003896	tup	1311	637	564	544	1583	756	1199	855	867	565	759	1022	1087	544	801	870	610	1096	829	491	1182	818	658	418
FBgn0003900	twi	13	10	8	5	46	34	20	17	25	7	16	39	17	19	14	10	16	21	16	5	11	8	7	10
FBgn0003920	snRNA:U2:14B	0	2	0	0	0	0	2	5	0	0	0	11	0	5	0	0	0	0	0	0	0	0	1	2
FBgn0003922	snRNA:U2:38ABa	4	4	8	2	0	0	0	0	0	0	5	7	0	3	0	0	0	1	0	1	5	1	0	0
FBgn0003923	snRNA:U2:38ABb	5	0	0	2	0	0	0	0	0	0	0	0	0	0	0	0	3	0	0	0	0	0	0	0
FBgn0003930	snRNA:U4:39B	19	12	13	13	31	20	7	14	71	19	49	63	24	6	13	23	1	20	26	9	25	9	17	28
FBgn0003931	snRNA:U4:38AB	6	0	1	1	0	0	2	0	0	0	0	0	0	0	0	0	0	0	0	0	0	0	1	4
FBgn0003935	snRNA:U5:34A	0	0	1	0	0	0	0	0	0	1	5	0	1	0	1	0	0	1	0	0	0	0	0	2
FBgn0003936	snRNA:U5:35D	0	0	0	0	0	0	0	0	0	0	0	0	0	0	0	0	0	0	0	0	0	0	0	0
FBgn0003938	snRNA:U5:63BC	0	1	0	2	0	0	0	0	0	0	0	0	3	1	0	0	1	0	3	0	0	0	1	2
FBgn0003941	RpL40	20199	13118	24281	24607	20425	17063	22218	22765	16048	12376	24739	29745	16283	18130	24905	25936	13607	23057	19782	19148	14648	12438	27537	16968
FBgn0003942	RpS27A	14459	12168	21867	21691	19558	18849	18368	25622	11721	11606	21355	31611	13198	17887	22832	24835	13150	22854	17719	18713	13708	12698	26424	18891
FBgn0003943	Ubi-p63E	7689	3965	2362	1818	13962	6747	13807	12560	5440	9204	6661	7452	15257	11537	15672	16443	7667	16388	14537	11254	13364	11912	10937	7216
FBgn0003944	Ubx	86	22	25	29	42	0	28	3	35	15	17	23	17	5	17	19	10	31	8	9	31	10	10	7
FBgn0003950	unc	4	0	3	1	12	0	6	3	4	2	5	11	10	5	1	1	9	20	5	9	25	19	8	5
FBgn0003961	Uro	2	0	0	0	3	0	1	0	0	0	0	1	0	0	0	0	0	5	0	2	0	0	0	0
FBgn0003963	ush	653	280	329	318	898	364	608	399	518	376	459	574	465	289	342	423	262	574	352	270	534	618	398	251
FBgn0003964	usp	3019	1668	1570	1443	3756	1831	2741	2372	2166	1454	1982	1877	2348	1637	2055	2066	1377	2390	1985	1534	2582	1889	1846	1237
FBgn0003965	v	399	301	981	832	290	151	414	602	351	837	830	537	507	768	2318	2129	413	1016	809	1022	162	170	1883	654
FBgn0003969	vap	3231	1577	1565	1407	4408	1784	2839	1944	1802	1459	1703	2111	2648	1544	1934	2133	1438	2728	1922	1253	2970	2191	1461	944
FBgn0003975	vg	618	235	117	107	744	234	423	263	336	248	283	258	403	245	200	223	259	508	206	138	342	277	141	167
FBgn0003977	vir	1462	684	793	723	1709	687	1232	847	1000	795	838	893	1219	795	989	1119	756	1427	965	862	1100	1125	715	513
FBgn0003978	vls	364	202	154	149	432	141	322	367	269	333	274	300	342	270	253	273	170	307	231	184	266	228	230	115
FBgn0003979	Vm26Aa	0	3	0	0	0	0	1	0	0	0	1	0	0	0	0	0	0	0	0	0	0	0	1	0
FBgn0003980	Vm26Ab	12	2	0	1	6	18	3	1	7	15	2	26	6	2	1	0	7	6	0	0	3	1	12	3
FBgn0003983	Vm34Ca	0	0	0	0	0	0	4	0	0	0	0	0	0	2	0	0	0	0	0	0	0	0	1	0
FBgn0003984	vn	451	216	446	399	453	147	597	331	288	239	518	502	451	219	608	566	220	307	440	208	435	249	365	260
FBgn0003996	w	656	354	530	442	217	113	279	286	320	401	907	740	209	134	391	506	342	398	1341	875	421	336	591	407
FBgn0003997	hid	660	257	329	271	465	206	431	243	341	327	432	354	356	198	275	321	335	461	602	182	426	210	319	192
FBgn0004003	wbl	91	40	90	79	137	75	97	85	207	146	287	391	116	75	102	99	79	126	157	87	150	138	241	165
FBgn0004034	y	11	9	7	9	3	0	5	0	8	2	11	9	6	0	2	8	0	15	3	2	9	6	12	3
FBgn0004045	Yp1	71	66	307154	522093	70	62	308	277	78	89	220452	284191	144	90	166708	853	441	259	174189	255319	215	207	349377	159612
FBgn0004047	Yp3	1764	984	285589	489429	1107	1161	2841	2667	2188	1344	223974	277965	2289	1944	118003	3250	1274	1883	118224	178237	1488	1412	318711	152175
FBgn0004049	yrt	1852	772	1107	1010	1932	897	1902	1236	1356	924	1220	1276	1669	896	1513	1652	977	1792	1592	1131	1715	1188	1115	715
FBgn0004050	z	2529	1360	1009	1007	3057	1388	2011	1970	1642	1269	1444	1686	2248	1600	1394	1571	1337	2540	1426	1072	1843	1829	1263	866
FBgn0004052	Z600	0	0	0	0	0	0	0	0	0	0	0	0	0	0	0	1	1	0	0	2	0	0	0	0
FBgn0004053	zen	1	0	0	1	0	0	0	0	0	0	1	0	0	0	0	0	1	0	0	0	1	0	0	1
FBgn0004054	zen2	0	0	0	0	0	0	0	0	0	0	0	0	0	0	0	0	0	0	0	0	0	2	0	0
FBgn0004055	uzip	5388	2915	3387	2722	5434	2011	5103	3801	4029	3080	4028	4230	4496	2042	4578	4510	2377	4111	4871	2681	6083	3421	4462	2122
FBgn0004057	Zw	677	360	1062	1124	433	119	629	624	587	568	1164	957	803	592	2322	2083	567	1072	1666	1690	648	617	1602	819
FBgn0004066	Prosalpha4	2417	1294	1165	1000	1677	758	1763	1596	1023	1892	1322	1506	1313	1230	1552	1556	833	1344	1750	1023	1380	1428	1706	936
FBgn0004087	Dhfr	106	126	140	132	148	210	121	148	53	97	175	175	95	136	172	165	93	112	122	114	84	80	179	85
FBgn0004101	bs	635	317	291	287	653	282	528	443	466	411	401	504	500	319	430	494	323	569	438	326	459	441	372	244
FBgn0004102	oc	2579	1205	1396	1092	2779	785	2986	1714	1500	1202	2062	2201	3211	1493	2201	2549	1881	2951	2206	1068	2941	1323	1364	884
FBgn0004103	Pp1-87B	10021	4857	7026	6069	10158	4100	10687	8297	6819	4553	6983	7649	8619	4669	9337	9727	4780	7975	8498	5389	10494	6593	8175	4414
FBgn0004106	Cdk1	4	3	7	4	7	21	17	9	10	2	18	0	14	0	12	9	8	6	6	6	10	7	15	8
FBgn0004107	Cdk2	363	202	134	119	422	275	238	208	245	197	197	194	387	248	213	275	229	443	270	166	303	291	160	102
FBgn0004108	Nrt	1764	940	1377	1186	1802	886	2087	1143	1066	757	1035	892	1761	791	1546	1589	788	1520	1730	1066	1905	1305	1301	848
FBgn0004110	tin	5	6	1	4	22	16	12	3	1	11	3	7	22	8	2	10	4	22	10	8	13	13	6	9
FBgn0004117	Tm2	12518	7265	9686	7935	12019	6324	9263	8660	7878	8766	13846	19788	7643	5586	7618	8894	7429	9019	21815	17266	12490	9839	12552	8653
FBgn0004118	nAChRbeta2	4549	2190	1928	1849	5175	3103	4119	3053	2356	1768	2242	2492	2525	1474	2117	2413	1631	2594	2201	1400	3458	2841	1932	1391
FBgn0004132	boca	1230	1087	739	726	1506	1280	1223	1488	914	814	1105	1749	968	1220	875	992	824	1180	730	653	1009	859	924	815
FBgn0004133	blow	1004	587	678	614	1228	745	1327	1078	835	838	849	1011	752	555	872	985	645	908	1079	891	774	729	737	546
FBgn0004143	nullo	9	2	1	1	2	0	0	0	0	0	0	1	0	0	0	0	0	0	1	0	0	0	2	0
FBgn0004167	kst	8603	3857	8029	6667	8427	3506	10782	7556	7010	5082	6587	6080	8245	4341	9596	10029	5108	8439	8440	7147	6817	5459	6530	3973
FBgn0004168	5-HT1A	5403	1758	1592	1419	5429	1559	3496	2160	2858	1846	2292	2285	3484	1673	1963	2383	1849	3075	2076	1211	3728	2556	1596	990
FBgn0004169	up	16316	9167	14868	11511	15257	8239	14787	11834	12790	11193	23997	34035	12271	7893	12602	14851	12315	13464	31712	30447	16544	12771	20947	13573
FBgn0004170	sc	0	4	0	0	0	0	0	0	0	0	0	0	0	0	1	0	1	0	0	1	0	0	0	0
FBgn0004171	Mst98Cb	0	2	0	0	1	0	5	0	0	0	0	0	0	0	0	0	0	0	2	0	0	2	1	0
FBgn0004172	Mst84Da	1	0	0	0	0	0	1	7	0	0	1	0	0	0	0	2	0	0	2	1	0	0	0	0
FBgn0004173	Mst84Db	1	1	0	0	2	0	1	0	0	2	1	0	0	0	0	0	1	0	0	0	0	1	0	0
FBgn0004174	Mst84Dc	1	0	0	0	0	0	3	0	0	0	0	3	0	1	0	0	0	0	1	1	0	0	0	0
FBgn0004175	Mst84Dd	1	0	0	0	2	0	1	0	0	2	1	8	0	0	0	0	0	2	0	1	0	0	2	0
FBgn0004177	mts	21107	10566	7882	7266	25846	11462	17991	16628	14146	11138	14392	20522	17160	11395	12964	13711	14247	19010	13996	8584	18122	11910	12270	9090
FBgn0004179	Csp	11703	5430	7301	6145	8656	3910	11783	7125	5885	4692	7717	8288	9056	3784	8566	9465	4527	7754	10850	4976	12843	6925	7144	3590
FBgn0004181	Ebp	10	0	0	1	13	0	14	0	58	21	16	1	0	0	0	0	0	0	16	9	1	0	0	0
FBgn0004183	snRNA:U1:82Eb	0	0	2	0	11	0	0	0	0	0	0	0	0	0	0	0	0	2	0	0	0	1	0	0
FBgn0004185	snRNA:U1:95Ca	0	0	0	0	2	0	0	0	0	0	0	0	0	0	0	1	0	0	0	0	0	0	0	0
FBgn0004186	snRNA:U1:95Cb	4	0	0	0	0	0	4	0	1	3	0	0	0	0	0	1	0	5	0	1	3	0	0	3
FBgn0004187	snRNA:U1:95Cc	3	0	1	0	4	0	5	0	5	1	0	0	1	2	2	0	2	1	3	0	2	0	3	18
FBgn0004188	snRNA:U6:96Aa	0	1	1	0	0	0	3	0	0	0	5	4	0	0	0	0	0	0	0	7	0	1	0	0
FBgn0004189	snRNA:U6:96Ab	0	0	0	0	0	0	1	0	0	0	0	3	0	2	0	1	0	0	1	0	0	0	0	0
FBgn0004190	snRNA:U6:96Ac	0	0	0	1	0	0	1	0	0	0	0	0	3	0	0	0	0	0	0	0	0	0	0	1
FBgn0004191	snRNA:U2:34ABa	15	62	54	58	0	0	11	3	4	0	1	6	0	0	0	0	0	0	0	0	0	0	0	1
FBgn0004192	snRNA:U2:34ABb	0	0	0	0	0	1	4	4	0	3	4	2	1	3	0	0	1	1	3	3	6	3	8	16
FBgn0004197	Ser	33	12	58	28	17	23	34	16	20	43	20	23	47	37	57	67	28	62	66	61	27	29	41	22
FBgn0004198	ct	13693	5442	4906	4690	14762	4884	13259	6446	7866	5833	11108	13347	12120	4871	6905	8084	7106	10572	8765	4248	13124	6548	5344	4254
FBgn0004227	nonA	7012	3361	3502	3131	7505	3876	6785	4649	4313	3388	4391	4803	5700	3016	4548	4972	3422	5326	4718	2924	6508	4438	3697	2352
FBgn0004228	mex1	8	4	3	10	2	0	4	0	6	2	0	2	2	3	1	1	2	10	2	3	2	0	3	0
FBgn0004237	Hrb87F	5906	2477	2193	2150	6697	2343	4974	2931	3400	2586	2766	3657	4289	2804	3585	3690	3299	5058	2543	2032	4530	3739	2812	1673
FBgn0004240	DptA	127	962	1200	44	98	178	162	22	50	37	5583	152	171	371	137	167	48	166	264	325	506	2	36	9
FBgn0004242	Syt1	51366	21906	28581	24062	38202	15206	38886	20914	28450	21596	32874	42138	32955	13590	25230	29623	19077	33146	33428	15007	44596	22324	19676	11992
FBgn0004244	Rdl	91710	34972	16031	14415	131933	40399	70237	47959	65219	40346	52621	80696	50367	25694	21720	29503	42103	56644	30715	13550	66867	37593	18511	21213
FBgn0004359	T48	498	274	394	370	671	268	622	584	441	329	540	607	460	310	714	630	297	598	521	403	412	322	540	350
FBgn0004360	Wnt2	111	60	49	15	105	20	48	20	500	600	855	1071	64	94	49	44	67	121	42	56	42	50	48	45
FBgn0004362	HmgD	3062	1966	1228	1060	6478	3084	3279	3283	3093	1452	1839	2029	2499	2145	1741	1899	1774	2726	1250	879	2641	1946	1471	980
FBgn0004363	porin	32851	21004	22131	19508	27130	18824	35993	37106	17273	17226	28566	32047	27105	19837	30986	34562	18395	28629	39119	31569	39139	29769	33980	23765
FBgn0004367	mei-41	301	120	190	134	305	168	256	179	214	192	144	163	258	169	261	254	180	328	167	154	226	195	145	52
FBgn0004368	Ptp4E	3930	1466	1810	1689	3875	1511	3443	1797	2705	1820	2181	2094	3487	1558	2778	2932	2038	3281	2520	1705	2810	2192	1791	1144
FBgn0004369	Ptp99A	12917	5131	4415	3825	13052	5019	8617	4828	6792	4456	6016	7116	8319	4429	5042	6393	5684	8825	5619	3105	7537	4959	3924	2727
FBgn0004370	Ptp10D	2387	913	1553	1313	2367	721	2166	1128	1552	1168	1768	1664	2156	878	1839	1834	1224	1968	2406	1321	2255	1599	1684	1040
FBgn0004372	aly	2	0	0	0	0	9	0	0	0	1	0	1	0	0	0	0	2	4	0	2	0	0	0	0
FBgn0004373	fwd	4831	2055	3891	3370	3965	1931	4558	2648	2796	2135	2930	2776	3957	1594	3941	4328	1966	3938	3735	2137	4605	3278	3067	1639
FBgn0004374	neb	615	374	247	232	186	40	90	75	55	59	84	74	114	83	90	70	97	170	73	46	60	71	53	38
FBgn0004378	Klp61F	4	0	4	3	1	0	6	8	0	0	2	0	6	2	7	3	0	25	1	0	3	9	7	8
FBgn0004379	Klp67A	62	21	29	21	90	83	14	21	66	38	13	8	58	66	19	19	39	96	15	15	41	54	10	9
FBgn0004380	Klp64D	4291	2359	2182	1958	5068	2728	4357	3962	2509	1970	2405	2880	3830	2322	3261	3448	2166	3393	2842	2039	4766	3245	2792	1681
FBgn0004381	Klp68D	3623	1945	1980	1774	3983	2307	4036	3216	2441	1822	2192	2207	3198	1745	2619	2996	1809	2858	2653	2002	4130	3183	2302	1467
FBgn0004387	Klp98A	3537	1396	2293	1935	3259	1565	3365	2204	1875	1659	2155	1734	2622	1367	2951	2972	1568	2751	2733	1926	3276	2729	2433	1438
FBgn0004389	bnk	3	1	2	0	0	0	0	0	1	2	0	0	0	0	0	0	2	7	1	0	0	1	0	0
FBgn0004390	RasGAP1	1910	794	1093	891	2765	957	1983	1104	1394	1058	1261	1124	2262	998	1539	1724	1103	2121	1398	922	1917	1511	966	651
FBgn0004391	shtd	534	257	337	266	581	230	354	300	482	305	339	397	448	223	357	398	244	452	372	282	370	334	298	181
FBgn0004394	pdm2	452	177	96	111	773	179	378	293	266	181	217	259	248	164	144	176	185	393	164	98	349	336	144	105
FBgn0004395	unk	4058	2286	2062	1696	5893	2283	3990	2146	1964	1819	2455	2901	3283	1726	2058	2390	2147	3570	2073	898	4781	2172	2052	1210
FBgn0004396	CrebA	1257	707	689	672	1291	464	1120	832	869	600	1328	1584	1146	734	902	921	708	1206	955	584	894	464	774	384
FBgn0004397	Vinc	7146	3301	4904	4761	6366	3317	8656	6578	5949	5158	6073	5668	7613	4262	6978	7893	3650	6170	8031	6890	7624	6788	4937	3643
FBgn0004400	rhi	1	4	3	2	91	38	332	329	3	2	15	21	5	5	4	4	0	2	6	0	1	3	5	0
FBgn0004401	Pep	23468	13473	8547	8144	31502	15052	17305	16989	18570	12570	12043	15438	20420	15847	13574	15737	11842	23866	10985	10144	16635	17312	10270	8545
FBgn0004403	RpS14a	16803	14427	17203	18612	21480	20354	20917	26513	12997	10102	19295	22050	15529	18291	20561	21314	13554	20198	16751	18395	16910	15326	26378	18324
FBgn0004404	RpS14b	5250	4422	3381	3349	7538	8529	7571	9409	4436	3474	6178	6659	4940	5763	7101	6981	4350	6027	4646	5444	4666	4515	8795	5686
FBgn0004406	PolG1	186	71	91	66	311	45	167	173	179	156	76	148	185	173	169	195	158	237	121	125	132	143	103	39
FBgn0004414	msopa	2	0	0	0	3	0	1	0	2	0	4	0	0	0	0	0	0	1	3	2	0	0	0	0
FBgn0004419	me31B	3018	1484	1981	1786	3867	1852	3241	2554	1878	1512	1753	2039	2542	1663	2546	2652	1298	2472	2099	1272	3164	1996	2161	1169
FBgn0004425	LysB	0	0	2	2	2	0	2	3	3	0	4	0	0	0	0	0	0	0	0	7	0	0	49	0
FBgn0004426	LysC	0	3	0	0	0	0	1	0	0	0	1	0	0	0	1	0	0	0	2	0	0	0	0	0
FBgn0004427	LysD	1	4	2	1	1	0	0	6	0	1	3	0	0	0	0	0	4	8	0	5	2	1	348	0
FBgn0004428	LysE	0	0	1	0	0	0	1	2	0	0	1	0	0	0	1	3	0	1	2	0	0	0	26	0
FBgn0004429	LysP	0	0	0	1	0	1	1	0	7	0	0	0	0	0	0	0	0	0	0	1	106	0	891	3
FBgn0004430	LysS	0	0	9	10	4	0	1	0	1	8	7	1	1	5	4	2	5	7	14	4	2	0	2	4
FBgn0004431	LysX	2	9	2	0	3	0	1	0	0	0	0	0	1	0	2	1	2	1	2	0	0	0	0	0
FBgn0004432	Cyp1	14053	8614	13658	12564	16349	7365	16744	15740	9845	7690	15178	16818	14300	10611	20811	20735	7940	15732	13993	11809	12220	9982	16840	9354
FBgn0004435	Galphaq	6656	4257	3431	3177	8452	5726	6852	5673	3997	3630	4691	6294	5858	3705	3688	4435	3712	6216	4089	2101	7696	4277	3317	2404
FBgn0004436	Ubc6	6901	3665	5207	4114	7885	3225	8188	5540	3482	3561	5927	6647	5462	3064	6424	7780	3405	6307	7683	3932	7151	3941	5850	3317
FBgn0004449	Ten-m	9081	4333	6562	5315	8668	3721	8555	4595	5511	4435	5878	5974	8522	3722	6196	7269	4450	8397	6642	3752	10021	6661	5549	2969
FBgn0004456	mew	1248	576	755	654	878	472	1114	696	728	512	818	913	920	424	1014	1046	459	929	939	621	917	642	987	472
FBgn0004463	Polr3B	614	339	329	332	796	412	568	449	626	431	464	498	513	359	407	492	327	536	407	278	660	597	463	263
FBgn0004465	Su(P)	2368	1772	1278	1265	2860	2188	2819	3168	1185	1458	1857	1850	1322	1017	1396	1466	1059	1692	1634	1432	2363	1925	1804	1266
FBgn0004507	GlyP	13708	6941	14004	11989	13011	7279	18576	16357	9403	9323	18696	21936	13103	7510	19358	20589	8954	13885	32628	28777	14065	11275	21329	10956
FBgn0004509	Fur1	5598	2833	3138	2555	6457	2912	5118	3557	4046	3370	4847	5977	4783	2690	4145	4299	3340	5229	4273	2213	5341	2906	3387	2004
FBgn0004510	Ets97D	461	317	221	251	649	313	396	365	353	270	245	391	471	336	348	364	306	554	304	251	430	352	285	223
FBgn0004511	dy	45	17	10	10	6	0	13	8	11	12	14	19	15	3	0	10	16	35	20	15	13	18	6	11
FBgn0004512	Mdr49	2803	1623	1880	1770	1409	777	2509	2117	3124	2909	1684	1697	3178	2167	3971	4073	1657	3341	2286	2302	1373	1138	2210	1227
FBgn0004513	Mdr65	1813	848	2127	1960	1064	820	2496	1461	1137	1598	2128	2134	2094	1130	2819	2486	1079	1819	3405	1892	2098	1489	2572	1175
FBgn0004514	Oct-TyrR	1144	632	605	517	1397	387	1106	697	714	556	644	619	878	446	732	819	478	812	868	459	1189	756	680	393
FBgn0004516	Gad1	39258	17988	18725	14610	31939	14710	33736	22332	19015	15359	22541	23227	25758	11978	22973	25514	15850	23520	32946	17910	38414	24461	19420	11352
FBgn0004552	Akh	5	8	0	4	5	0	7	5	5	2	8	20	10	15	15	12	10	13	15	5	10	5	6	3
FBgn0004554	Edg91	30	20	69	26	31	88	5	15	5	5	112	41	5	7	3	5	16	4	29	16	18	16	9	1
FBgn0004556	Dbp73D	220	146	185	159	382	249	206	223	178	142	146	189	186	215	250	235	160	267	203	143	208	167	260	151
FBgn0004567	slp2	224	139	111	74	193	39	166	154	140	98	126	150	171	93	163	170	66	233	145	80	194	138	152	111
FBgn0004569	aos	354	239	478	384	259	217	407	308	264	357	438	411	296	163	583	471	256	343	673	341	356	296	647	329
FBgn0004573	5-HT7	1288	602	530	429	1311	541	984	669	840	597	741	1086	1064	486	684	747	538	971	758	336	1204	735	506	314
FBgn0004574	Rop	19529	9460	9982	8645	19884	9332	20010	16000	10436	8721	11192	10846	14712	7925	13729	15175	7527	12728	15748	10507	19864	14556	12768	7814
FBgn0004575	Syn	22082	9423	12071	9809	19636	6874	18276	8763	13289	10606	13143	13861	21451	8068	13789	16325	9288	18386	14993	7922	22064	13969	9332	5629
FBgn0004577	Pxd	307	74	34	2	0	1	107	2	8	408	28	4	4	7	3	2	49	10	690	71	20	71	4	6
FBgn0004580	Cbp53E	25096	11778	11343	9164	20943	11360	19137	12943	10027	9185	12263	13721	12574	6114	10197	11896	9517	13754	18369	8376	19829	10946	10187	6197
FBgn0004581	bgcn	6	0	3	1	3	0	3	9	3	9	2	9	1	3	2	1	7	6	0	4	5	6	7	2
FBgn0004583	ex	284	91	508	377	369	61	285	157	240	157	277	249	263	172	511	553	202	358	549	331	291	219	387	256
FBgn0004584	Rrp1	697	418	208	232	992	510	588	542	532	358	366	478	652	444	448	412	483	774	440	297	583	592	359	244
FBgn0004587	B52	24971	10060	8499	8300	26953	12146	18075	12545	15965	10357	11751	14343	18919	10629	10983	12868	12266	21508	11370	8235	16814	14739	8266	7094
FBgn0004588	Eig71Ea	1	0	0	0	0	0	0	0	0	0	0	0	0	0	0	0	0	0	0	0	0	0	0	0
FBgn0004589	Eig71Eb	0	0	0	0	0	0	1	0	1	0	0	0	0	0	0	0	0	0	0	0	0	0	1	0
FBgn0004590	Eig71Ec	0	0	0	0	0	0	0	0	0	0	0	0	0	0	0	0	0	0	0	0	0	0	0	0
FBgn0004591	Eig71Ed	0	0	0	0	0	0	0	0	0	0	1	0	0	0	0	0	0	0	0	0	0	0	0	0
FBgn0004592	Eig71Ee	0	0	0	0	0	0	0	0	1	0	0	0	1	0	0	4	0	1	0	0	0	0	0	0
FBgn0004593	Eig71Ef	0	0	0	0	0	0	0	0	0	0	0	0	0	1	0	0	0	0	0	0	0	0	0	0
FBgn0004594	Eig71Eg	0	0	0	0	0	0	0	0	0	0	0	0	0	0	0	0	0	0	0	0	1	0	0	0
FBgn0004595	pros	130558	43618	21567	18837	190451	50454	94692	58174	79190	44322	65628	85486	79586	36741	32551	41447	65448	94566	41290	18911	96354	51167	25939	25953
FBgn0004597	CycC	458	258	317	269	512	368	464	418	216	263	350	351	387	306	351	383	232	478	333	254	369	277	298	168
FBgn0004598	Fur2	7431	3371	4177	3423	8371	4326	6388	5291	4917	4035	4358	4622	5992	3303	5083	5474	3787	6421	5187	3845	5839	4957	4321	2562
FBgn0004606	zfh1	1524	569	824	545	1593	488	1381	520	844	596	923	1113	1150	583	853	957	633	1062	783	452	965	664	860	474
FBgn0004607	zfh2	2253	956	1883	1527	2466	533	2147	960	1438	1012	1319	1232	2329	929	1577	1691	1043	2039	1719	733	2499	1360	1175	682
FBgn0004611	Plc21C	11430	4646	6038	4993	12062	4610	9502	4904	6213	4769	5230	5360	8701	3703	6461	7284	4688	8886	6454	3755	9721	6770	4841	2714
FBgn0004618	gl	2888	1351	1763	1494	2103	894	3647	2764	2068	1645	2236	2507	2768	1365	2587	3080	1260	2276	2539	1915	3276	2521	2056	1479
FBgn0004619	GluRIA	3093	1440	1263	1092	4440	1647	2788	2270	1829	1452	1644	1793	2413	1432	1579	1820	1578	2670	1757	1143	2903	2292	1428	981
FBgn0004620	GluRIIA	601	290	436	417	381	164	398	334	207	213	200	286	480	317	491	476	246	560	336	271	424	387	300	220
FBgn0004622	TkR99D	965	374	368	278	1397	495	949	723	881	575	641	748	928	547	616	672	547	979	636	409	1063	773	452	372
FBgn0004623	Gbeta76C	47358	33872	43339	42267	24575	26998	91020	98818	33744	38288	68773	52330	48855	33571	88456	101348	30363	38804	97021	81025	61839	46133	74129	54963
FBgn0004629	Cys	5644	4209	7329	7466	8402	7228	14980	15800	6726	7880	16614	22393	7867	8999	15207	15224	6953	11923	21290	15521	8152	6684	27339	13838
FBgn0004635	rho	1291	543	645	593	994	331	933	463	778	508	799	861	949	414	707	736	698	1038	949	433	1236	587	815	554
FBgn0004636	Rap1	7001	3588	3445	2983	9339	3482	6862	4733	3985	3218	4900	6160	5142	3612	4534	5066	4663	7464	5096	2825	7601	4625	5238	3079
FBgn0004638	drk	2119	1113	1891	1508	2190	1087	1843	910	1187	1018	1505	1620	1789	875	1605	1454	1034	1983	1615	773	2071	1210	2110	885
FBgn0004643	Zw10	919	488	589	542	1483	586	1043	891	712	670	644	600	926	647	700	869	541	1010	644	582	1021	1010	746	449
FBgn0004644	hh	64	13	24	32	135	7	67	20	124	81	28	37	114	53	90	66	98	123	66	81	29	61	56	26
FBgn0004646	ogre	1952	896	2603	2315	1253	686	2146	1350	1100	868	2504	2231	1860	906	3643	3576	1110	1969	3619	2205	2183	1142	4009	1747
FBgn0004647	N	1109	660	1213	1018	820	570	1364	658	639	528	1075	1132	1163	598	1138	1159	675	949	1363	850	1079	698	1016	611
FBgn0004648	svr	12868	6139	8991	7622	13444	6081	11764	8324	8610	6452	8359	8108	12142	6251	10824	11822	5880	12918	9459	6069	12225	7839	8253	4308
FBgn0004649	yl	2	1	81	5	0	0	0	0	0	0	1	0	0	5	2	0	6	0	1	0	0	0	0	4
FBgn0004650	fs(1)N	21	8	29	13	15	0	29	7	54	11	7	9	3	8	8	7	3	19	6	6	35	23	99	96
FBgn0004652	fru	6768	2745	3954	3703	8285	2975	7875	4973	3934	2463	4786	4948	5062	2536	4784	5402	3147	5234	4183	3044	4851	3350	3815	2717
FBgn0004654	Pgd	1572	1011	2768	3351	1246	811	2148	2180	1143	1660	3129	2513	1819	1592	6731	5839	1384	2403	3956	4220	1234	1424	4398	1949
FBgn0004655	wapl	3487	1372	1721	1599	4049	1225	2668	1698	2315	1530	1599	1594	2758	1177	2024	2126	1498	2527	2026	1458	2867	2343	1548	990
FBgn0004656	fs(1)h	26084	10564	7410	6816	37344	13327	21165	12810	19295	11418	14829	19484	19382	11706	10412	13054	13333	22083	10221	6399	20237	13477	8056	7559
FBgn0004657	mys	3403	1217	2278	1911	3344	887	3186	1739	2913	2023	2496	2297	2862	1449	2853	3027	1795	3032	3633	1958	2923	2056	2514	1370
FBgn0004666	sim	309	100	100	73	282	49	199	175	232	129	139	153	228	154	123	125	128	189	125	88	226	170	93	83
FBgn0004687	Mlc-c	2964	1761	3210	2814	2948	1796	3390	2942	1740	1546	3418	3698	2730	2089	3531	3715	1756	3193	3582	2461	3213	2324	3511	1937
FBgn0004698	Xpc	5129	2338	2778	2377	6366	2323	4501	3558	3212	2102	2759	2457	3673	2143	3066	3484	2094	3598	2988	2153	3756	3063	2432	1515
FBgn0004777	Ccp84Ag	17	12	7	8	4	35	29	23	234	357	478	396	95	50	149	127	28	24	155	58	154	130	135	125
FBgn0004778	Ccp84Af	0	0	0	0	2	0	0	0	0	0	0	0	0	0	0	0	0	0	0	0	0	0	1	0
FBgn0004779	Ccp84Ae	7	0	3	1	0	0	1	6	0	8	1	5	1	2	1	0	0	0	0	3	0	13	3	0
FBgn0004780	Ccp84Ad	5	4	5	0	0	14	10	0	11	1	4	19	1	0	0	0	2	2	36	7	13	4	1	0
FBgn0004781	Ccp84Ac	1	1	2	0	0	0	5	0	3	0	2	7	0	0	0	0	8	0	31	11	2	3	0	1
FBgn0004782	Ccp84Ab	116	136	59	2	4	0	268	4	70	146	74	176	5	4	4	3	66	18	600	13	81	180	8	0
FBgn0004783	Ccp84Aa	26	28	58	0	0	6	44	0	78	15	64	133	0	1	4	6	8	2	106	15	13	33	0	0
FBgn0004784	inaC	27178	16558	32665	31412	15443	13555	52881	47459	18027	17930	28468	22392	31958	18307	53002	57222	14967	21589	41939	28936	41603	23930	38577	22963
FBgn0004795	retn	2803	1221	2106	1749	1527	709	3008	1978	1789	1258	1956	1724	2469	1073	3028	3034	1279	2036	2601	2160	3053	1931	1858	1221
FBgn0004797	mdy	343	215	875	724	232	123	406	321	243	356	470	432	332	304	973	965	222	471	494	364	253	211	1284	419
FBgn0004811	fs(2)ltoPP43	769	415	450	471	1052	498	765	657	544	454	525	618	683	592	709	743	494	818	517	416	806	628	621	377
FBgn0004828	His3.3B	41811	24680	27315	24828	43718	24023	45294	30664	21068	19820	30774	34014	40361	23313	30814	33318	20735	37960	30210	18121	48452	28528	29777	18151
FBgn0004832	Xpac	872	504	280	233	1210	575	614	708	618	423	438	525	643	532	382	385	403	674	386	294	772	671	385	256
FBgn0004837	Su(H)	623	300	446	352	636	261	598	462	386	273	485	460	587	290	613	545	300	551	537	323	759	451	561	275
FBgn0004838	Hrb27C	48466	23428	21208	19154	72040	26484	51184	30963	32700	23614	38337	49731	45663	24821	27732	29547	30445	43758	24790	11740	44209	20216	21389	14358
FBgn0004839	otk	438	208	161	139	484	322	320	199	311	226	274	230	356	138	195	244	160	338	257	208	323	312	171	148
FBgn0004841	TkR86C	474	303	219	213	383	228	289	285	304	255	298	370	411	260	260	272	234	385	266	178	522	343	228	158
FBgn0004842	RYa-R	110	62	32	39	158	103	80	52	84	50	43	33	71	57	46	66	43	78	48	34	140	114	47	58
FBgn0004852	Ac76E	2824	1131	1984	1738	2916	999	2468	1570	1698	1208	1670	1892	1971	944	2016	2055	1060	2018	2085	1255	2345	1689	1685	1000
FBgn0004854	B-H2	170	88	148	116	143	24	124	75	105	98	121	107	124	85	198	167	66	143	171	115	196	109	168	57
FBgn0004855	Polr2I	699	438	384	350	1043	490	687	764	428	405	623	687	568	509	481	594	399	710	522	398	574	450	514	384
FBgn0004856	Bx42	2437	1463	1415	1279	2472	1410	2251	1893	1495	1445	1881	1881	1969	1487	1905	1911	1359	2211	1713	1636	2130	1765	1766	1189
FBgn0004858	elB	3172	1247	1113	1014	3580	909	2401	1667	1620	1233	1598	1545	2203	1437	1558	1694	1476	2511	1852	1186	1754	1338	1310	986
FBgn0004859	ci	738	377	826	679	502	190	563	357	441	449	624	737	605	294	879	863	329	759	867	387	691	353	693	250
FBgn0004860	ph-d	1689	761	708	597	2296	805	1426	962	1098	769	821	931	1537	756	940	1179	833	1532	939	712	1381	1140	677	472
FBgn0004861	ph-p	3260	1378	1345	1051	3347	1295	2323	1781	2023	1354	1690	1916	2367	1256	1578	1790	1343	2619	1646	1129	2635	2077	1215	971
FBgn0004862	bap	53	11	15	16	95	18	44	46	31	7	26	43	40	36	35	38	19	66	30	32	30	25	18	27
FBgn0004863	C15	148	107	45	44	282	153	131	136	103	103	83	90	105	110	61	105	95	144	86	45	123	101	42	49
FBgn0004864	hop	1266	524	871	737	1401	312	1076	561	856	558	673	723	1051	469	836	931	459	946	822	534	1061	882	639	328
FBgn0004865	Eip78C	2963	1190	1144	982	2351	947	2044	1293	1278	1008	1352	1704	1860	826	1186	1466	1018	1767	1751	739	2349	1543	1066	615
FBgn0004867	RpS2	33525	26566	35796	38295	42519	29310	37303	42127	23268	27521	37787	46736	32846	39281	40702	43398	27462	50052	30452	35525	34455	35651	55242	34903
FBgn0004868	Gdi	11483	5952	7671	6968	13732	7194	12133	10245	7451	5990	8304	9361	9056	5324	10250	10455	4849	8500	8311	5927	10410	7115	9440	5221
FBgn0004870	bab1	1026	424	293	284	878	177	535	292	758	427	504	599	768	511	406	503	332	650	339	181	586	466	249	168
FBgn0004872	piwi	39	7	43	29	41	0	27	14	35	19	21	18	56	9	43	26	14	27	18	11	7	6	8	4
FBgn0004875	enc	14532	4933	5866	4721	15446	4963	12473	6525	7485	4577	7022	6968	10298	4302	6777	7969	5998	9873	8140	4469	11468	7826	5097	3518
FBgn0004876	cdi	4983	2160	3323	2840	3643	1669	4118	1995	2084	1597	2166	2083	3075	1329	2965	3181	1599	2647	2614	1821	4047	2653	2448	1513
FBgn0004878	cas	4	0	3	4	0	0	0	2	0	0	2	3	1	0	0	4	1	1	1	0	0	1	0	3
FBgn0004880	scrt	43655	15563	10543	9171	49697	12256	29752	17164	26885	13559	21262	23564	23618	12458	11786	15077	15531	23967	13318	7033	26354	16551	9048	8275
FBgn0004882	orb	1348	642	753	646	1218	414	1211	608	696	581	745	875	1193	418	736	890	567	1250	857	307	1698	875	656	373
FBgn0004885	tok	6366	2617	4580	3593	6142	2196	5032	3339	4492	3712	3791	3212	5058	2901	5318	5948	2570	5319	4201	3038	5440	4795	5631	2471
FBgn0004888	Scsalpha1	10328	6889	10144	9074	9805	7681	11930	13492	5973	5985	12148	11848	7585	6048	13194	14524	5329	7811	11676	10293	9584	7705	15471	8727
FBgn0004889	tws	3877	1906	3156	2658	4228	1463	4101	1959	2245	1764	2893	3223	3497	1600	3365	3855	2006	3378	3240	1653	3874	2376	2691	1487
FBgn0004892	sob	46	36	35	43	86	42	42	61	53	57	69	46	96	51	49	63	52	92	74	35	54	46	65	39
FBgn0004893	bowl	383	201	402	363	399	98	409	258	327	322	533	493	428	267	603	570	205	438	468	297	435	349	473	288
FBgn0004895	FoxL1	0	1	0	0	5	0	0	0	0	1	0	0	2	0	0	0	0	1	1	0	0	0	0	0
FBgn0004896	fd59A	854	500	295	310	1290	688	959	921	618	411	569	710	731	594	534	619	541	928	611	476	849	679	417	287
FBgn0004897	fd96Ca	21	7	2	1	41	10	19	23	7	14	8	10	18	7	10	5	19	9	3	9	12	6	10	1
FBgn0004898	fd96Cb	17	15	9	4	24	0	21	16	19	7	9	28	15	9	31	18	27	16	26	16	25	12	22	23
FBgn0004901	Prat	204	100	174	143	168	58	222	139	258	209	135	168	182	155	218	238	132	194	208	194	211	142	188	133
FBgn0004903	Rb97D	3310	1550	1730	1366	4259	1242	3308	2066	2375	1805	2424	3588	2712	1578	1848	2204	1625	3028	1875	1177	3006	1963	1394	948
FBgn0004907	14-3-3zeta	72734	36405	42779	38273	66379	30508	71767	46849	37431	29607	47514	51778	58572	26045	52035	54916	33622	54267	58511	28206	79345	39880	46674	27446
FBgn0004908	Arl2	435	367	273	251	552	409	572	455	288	326	456	504	462	353	396	377	231	461	362	273	493	360	385	222
FBgn0004910	Eip63F-1	2220	1617	2350	1913	3264	2486	4785	2568	1944	1615	3100	3544	3245	1595	2841	3248	1831	2834	3207	1562	4843	2220	3104	1687
FBgn0004911	asRNA:Eig63F-2	8	8	10	4	0	0	2	0	2	2	1	3	4	1	1	6	4	4	4	3	2	0	5	2
FBgn0004913	Gnf1	1451	763	724	671	1930	772	1230	1127	1069	690	773	828	1188	781	952	1037	700	1222	785	637	1240	1013	822	488
FBgn0004914	Hnf4	1296	563	1647	1461	1132	458	1313	872	930	940	1772	1539	1585	945	3252	2922	899	1892	1961	1642	1601	1411	2784	1399
FBgn0004915	TfIIB	1108	659	662	515	1144	908	1013	984	580	563	796	773	945	556	855	890	548	815	882	608	1030	653	806	401
FBgn0004919	gol	7783	4599	6094	5871	6139	3177	5017	4274	4604	3752	4130	3794	6341	3591	4049	4648	3814	6887	6542	4459	4648	2806	2861	2379
FBgn0004921	Ggamma1	56574	28635	32810	26581	60197	24103	56593	38518	30973	25389	34959	39232	49383	24715	41566	50346	24238	48097	47471	22046	52893	30560	29917	16774
FBgn0004924	Top1	8022	2882	3348	2925	7555	2305	5386	3357	4323	2453	3509	3101	4670	2502	3848	4013	2824	4707	3966	2684	4914	3757	3031	1842
FBgn0004926	eIF2beta	3255	2511	2109	2255	4371	3085	2837	3461	3046	2291	3048	3830	2682	3074	2898	2941	2916	3989	2440	2160	2453	2245	3592	2814
FBgn0004956	upd1	2	0	0	2	2	0	0	4	0	0	3	0	2	3	0	3	4	0	2	3	2	1	2	0
FBgn0004957	por	495	263	275	276	519	307	490	500	363	304	340	349	381	322	352	380	254	389	273	277	424	404	293	209
FBgn0004959	phm	17	34	48	61	4	0	2	0	71	112	82	110	11	9	77	47	7	43	22	32	7	14	61	78
FBgn0005198	gig	2901	1233	1819	1589	4177	1930	3417	2221	2411	1704	2012	2215	2928	1807	2345	2632	1477	2692	2152	1574	2823	2418	1884	1145
FBgn0005278	Sam-S	9332	5438	11301	8399	8376	4585	11320	8480	4442	4486	7775	7954	7273	4779	11740	14607	4590	9008	9845	6457	8159	5386	11150	5038
FBgn0005322	nmd	1433	869	862	849	1734	716	1468	1135	1521	1170	1132	1173	1323	912	1231	1298	899	1318	1096	777	1400	1061	1256	687
FBgn0005355	Su(fu)	817	377	459	401	992	687	774	827	464	413	567	600	626	543	655	708	417	710	564	451	648	527	540	364
FBgn0005386	ash1	3092	1111	1323	1131	3952	1411	2142	1554	2131	1310	1333	1386	2352	1159	1548	1724	1312	2393	1478	922	2414	2121	1074	741
FBgn0005390	fs(1)M3	139	44	49	36	39	56	36	22	89	94	97	144	511	354	199	247	24	54	48	19	13	18	11	3
FBgn0005391	Yp2	635	318	137076	239099	85	41	195	179	83	89	138666	170387	122	63	109432	639	214	124	116007	166792	99	76	200378	87613
FBgn0005411	U2af50	2625	1715	1735	1417	3186	1901	2838	2806	1607	1587	2214	2318	2306	1641	2214	2414	1409	2669	2098	1594	2319	1909	2209	1280
FBgn0005427	ewg	6538	2781	2705	2340	7697	2573	4841	3707	4075	2637	3152	3163	4978	2649	3239	3705	2567	5252	3240	2109	5003	3840	2518	1619
FBgn0005533	RpS17	18338	13383	22154	21796	20335	19978	21153	25754	13437	13493	28677	34973	18389	22678	27884	27711	15256	25996	20434	21778	16513	15287	33555	20678
FBgn0005536	Mbs	8498	3393	5488	4585	9035	3626	7963	5082	5299	3769	5842	6864	7048	3355	5468	6171	4479	7664	6107	4287	7224	5152	5068	3066
FBgn0005558	ey	3612	1506	1201	1023	3387	1611	2270	1504	2069	1495	1652	1881	2470	1502	1658	1837	1241	2848	1494	910	2334	2088	1305	900
FBgn0005561	sv	717	530	873	789	581	284	1014	444	323	394	815	818	790	288	870	972	378	790	1026	615	1358	613	697	479
FBgn0005564	Shal	6564	3295	3371	2828	7268	3770	6438	4399	4038	3129	3994	4915	5272	2601	3897	4284	2990	5004	4774	2323	6435	3656	3143	1864
FBgn0005585	Calr	12289	7705	8403	8746	11874	7478	10561	11725	15872	13350	8468	10266	11040	10018	12259	12947	7199	12834	8676	8332	9670	9150	13820	8681
FBgn0005586	Rab3	19435	9122	8248	6687	20448	7508	17153	11460	10868	8943	11720	14328	16019	7223	11195	12828	8629	16290	14726	7019	17336	10113	8638	4437
FBgn0005590	scw	11	4	2	4	0	0	0	0	0	0	4	3	2	0	1	0	0	1	5	2	1	0	1	0
FBgn0005593	RpL7	25651	15755	31576	28463	35145	17559	25608	28039	21265	19010	30567	35699	23178	29052	35656	38926	17915	39081	26590	28985	21176	22212	42458	25563
FBgn0005596	yem	795	331	293	325	884	225	602	444	510	450	420	463	637	363	437	468	331	676	426	303	641	524	364	217
FBgn0005612	Sox14	1417	831	845	673	697	258	978	494	730	1411	1177	1128	668	544	1306	1261	878	1087	2047	917	575	784	1138	637
FBgn0005613	Sox15	147	33	100	82	141	16	83	40	68	52	88	108	77	48	137	132	47	161	77	74	101	78	137	59
FBgn0005614	trpl	97528	44979	92089	86959	57506	23802	144997	108241	43729	32195	58722	52387	122666	58920	164635	172770	12945	25735	22684	19632	94205	88851	75878	47507
FBgn0005616	msl-2	2250	1097	1332	1028	3165	1244	2614	1994	1878	1456	1321	1359	2073	1169	1713	2066	975	2119	1268	1038	2345	1908	1135	769
FBgn0005617	msl-1	1211	552	795	761	1413	710	1043	712	817	497	574	428	1029	562	944	1009	551	1024	824	587	1166	954	682	428
FBgn0005619	Hdc	4001	1650	3191	2649	4385	2040	8979	6323	2967	2656	5062	4439	3088	1610	5037	5673	1498	2566	4930	4084	4023	3195	4218	2470
FBgn0005624	Psc	883	305	359	303	702	287	615	434	490	318	487	535	621	360	526	653	347	718	615	425	639	518	436	314
FBgn0005626	ple	3072	1305	2366	1891	2121	780	2523	1603	1415	2583	2778	2623	1770	878	3151	2552	1314	1947	4625	1911	2107	1439	2997	1322
FBgn0005631	robo1	3659	1245	1703	1293	3507	1071	2691	1678	1979	1278	1745	1972	2603	1116	1903	2253	1349	2702	2167	1247	3086	2035	1337	794
FBgn0005632	faf	10971	4565	7508	6400	11477	4532	11000	6687	6985	4959	6201	6275	9095	4625	8142	8259	5518	8878	7524	4956	10276	7558	6408	3666
FBgn0005633	fln	7	12	5	3	21	0	9	3	17	16	9	10	10	5	3	7	4	12	4	1	12	5	6	2
FBgn0005636	nvy	3744	1958	1385	1237	4327	1781	2992	2648	2124	1536	1762	1835	2478	1467	1685	1873	1480	2739	1694	1291	2598	2254	1452	1042
FBgn0005638	slbo	42	29	49	43	23	0	62	50	35	24	78	106	38	22	58	48	16	33	41	37	47	40	54	60
FBgn0005640	Eip63E	5927	2518	3104	2701	6243	2036	4856	3001	3604	2356	3485	3812	4236	1875	3570	4241	2614	4287	3783	1943	5074	2813	3009	1683
FBgn0005642	wdn	1380	785	607	611	2258	1094	1178	1082	1080	846	742	815	1265	961	1017	1006	704	1455	697	591	1079	1056	841	502
FBgn0005648	Pabp2	1891	1334	658	607	2912	1360	1352	987	1524	1516	1434	2083	2404	1726	1190	1287	1713	2916	1126	741	2379	1584	1142	863
FBgn0005649	Rox8	8450	3606	3257	2944	9212	2630	6793	5488	5544	4164	4819	5659	6809	4033	5461	5733	4470	6939	5410	3450	7146	5090	4662	3149
FBgn0005655	PCNA	40	26	45	24	27	0	32	18	7	54	51	32	20	22	40	38	62	89	141	126	27	26	55	24
FBgn0005658	Ets65A	2128	881	830	714	1996	907	1816	1026	1175	795	1089	834	1392	612	1098	1140	851	1255	1226	625	1742	1183	903	561
FBgn0005659	Ets98B	737	276	669	681	433	179	512	320	442	371	716	766	515	289	854	897	331	670	840	568	421	332	674	358
FBgn0005660	Ets21C	144	54	61	58	271	74	53	63	184	277	121	124	121	162	94	92	195	393	102	95	53	57	172	170
FBgn0005664	Crys	933	716	303	57	306	122	1179	280	522	1608	920	476	186	74	168	195	1167	234	6991	1468	973	860	572	487
FBgn0005666	bt	12620	5033	10043	7258	13038	6506	12224	6864	8079	5596	12795	16165	7588	3767	6288	7217	7321	8818	10757	5622	9826	5974	7252	4546
FBgn0005670	Cyp4d1	2	7	11	2	25	1	28	50	563	998	178	174	29	62	45	73	18	29	11	10	1	1	23	1
FBgn0005671	Vha55	26716	12487	16405	13659	22239	11348	27982	18363	14241	11766	18663	20128	19944	10028	22353	24070	11398	19296	24098	16168	25742	17842	19994	12002
FBgn0005672	spi	6605	3367	2649	2187	7906	4182	4547	4246	3849	3036	3521	4297	5329	3843	3547	3891	3451	6025	3110	2244	5485	4138	3246	2141
FBgn0005674	GluProRS	1880	880	1840	1738	2156	1068	1854	1501	1254	1235	1174	1276	1488	1052	2106	2057	1304	1989	1846	1387	1412	1353	1815	1029
FBgn0005677	dac	3594	1569	1077	999	4649	1345	2316	1485	2041	1336	1213	1623	2654	1423	1441	1698	1614	2958	1373	927	2168	1746	1137	828
FBgn0005683	pie	111	48	34	37	172	106	100	92	84	79	62	80	135	110	80	66	47	114	55	44	120	71	51	40
FBgn0005694	Aef1	2847	1180	1674	1449	3046	934	2464	1686	1620	1128	1690	1714	2262	1118	1847	2087	1250	2456	2120	1190	2741	1721	1710	848
FBgn0005695	gcl	1363	572	694	553	1474	700	1083	844	756	657	784	680	926	643	823	1014	550	1008	834	565	1153	881	715	407
FBgn0005696	PolA2	81	18	39	33	102	0	75	31	50	33	33	51	65	45	55	56	44	66	52	18	27	37	56	29
FBgn0005771	noc	3330	1852	2099	1762	3258	1563	2976	2188	1714	1823	2239	2802	2904	1831	2678	2855	1439	3170	2551	1604	3762	2898	2767	2154
FBgn0005775	Con	15113	8676	4519	4195	16554	6098	9998	7023	8394	6213	8056	11520	10682	6243	6230	7579	7913	11806	6996	3731	10379	5665	4394	3557
FBgn0005777	PpD3	1183	518	829	759	1162	765	1198	990	671	515	759	829	915	433	986	1079	576	1108	1039	683	1069	744	835	463
FBgn0005778	PpD5	2	6	1	4	1	26	2	10	0	9	1	0	0	0	0	0	0	0	0	0	0	1	0	0
FBgn0005779	PpD6	0	0	0	0	0	0	0	0	0	0	0	0	0	0	0	0	0	0	0	0	0	0	0	0
FBgn0008635	betaCOP	4105	2252	3432	3240	4574	1650	4240	3655	2897	2597	3201	3163	3454	2812	4139	4505	1908	4324	3825	3540	3574	3457	4257	2735
FBgn0008636	hbn	1004	481	302	264	1053	433	809	791	650	483	580	763	660	390	402	542	471	788	469	349	775	720	442	296
FBgn0008646	E5	201	69	69	75	258	133	158	134	149	165	138	174	236	148	163	156	156	257	146	145	132	125	129	100
FBgn0008651	lbl	196	117	132	111	237	127	151	99	219	137	180	253	221	162	224	156	181	255	138	140	113	137	136	102
FBgn0010014	CanB	7980	3821	3446	3001	8365	3943	8189	6002	4495	3106	4914	5329	5769	3228	4892	5088	3835	5736	5614	3379	7505	4739	4150	3090
FBgn0010015	CanA1	367	168	280	194	344	110	319	170	282	209	257	361	205	171	256	246	211	336	333	204	278	228	281	183
FBgn0010019	Cyp4g1	108	38	32	17	133	397	101	32	163280	153823	242	36	268	124	5	3	0	199	99	33	113	16	1	0
FBgn0010038	GstD2	70	62	68	70	71	205	34	58	80	91	380	295	278	320	540	482	463	817	424	598	170	189	1122	2127
FBgn0010039	GstD3	485	360	460	434	154	113	288	365	234	126	469	453	403	298	668	762	359	698	717	441	346	272	513	504
FBgn0010040	GstD4	0	3	2	4	0	0	2	0	0	2	4	2	15	6	14	20	1	17	12	19	8	2	17	9
FBgn0010041	GstD5	2	2	0	1	5	0	6	11	6	10	10	15	27	46	21	29	38	83	47	37	8	4	35	35
FBgn0010042	GstD6	3	2	6	1	2	0	2	0	5	6	8	0	1	8	10	1	3	8	15	5	3	2	16	20
FBgn0010043	GstD7	1	0	1	1	5	0	3	0	0	0	1	2	2	2	23	6	0	0	5	1	0	3	6	4
FBgn0010044	GstD8	14	15	16	12	9	18	12	29	14	7	29	20	22	10	16	30	16	27	24	24	26	17	32	18
FBgn0010051	Itpr	4659	1661	3244	2623	7200	2570	5557	3165	2934	2178	2723	2570	3867	1723	3306	3611	1890	4117	3166	2072	3924	3005	2347	1292
FBgn0010052	Jhe	59	21	99	94	14	0	67	62	32	49	62	61	32	9	165	153	0	1	6	0	51	46	266	146
FBgn0010053	Jheh1	856	559	1815	1553	405	276	1429	1427	2592	4473	3324	3346	2284	1901	11488	10007	1102	2757	2950	2517	2991	2325	10069	4395
FBgn0010078	RpL23	12683	14964	27908	29143	17543	18530	21440	26237	9293	12423	20923	21725	17873	19154	29937	28416	14087	24418	23606	23239	19743	17551	40419	22653
FBgn0010097	gammaTub37C	0	0	5	1	0	0	3	0	4	5	0	1	6	0	0	0	1	1	0	1	0	0	1	1
FBgn0010100	mAcon1	28917	14223	24610	20435	21968	11111	29988	25715	15170	12137	22527	24422	21957	13027	28664	32177	11528	20709	31672	28420	25072	21085	25945	15076
FBgn0010105	comm	2096	996	908	838	2302	925	1775	1337	1222	883	1300	1509	1667	1191	1352	1467	951	1868	1093	846	1893	1324	1151	637
FBgn0010109	dpn	16	8	11	5	8	0	12	4	1	3	8	18	2	2	9	10	9	2	22	6	22	8	11	10
FBgn0010113	hdc	11412	5114	3006	2846	23158	6922	11403	7415	8626	5642	6702	10621	9609	6308	4391	5885	6456	11973	3887	2341	8573	5441	3210	2934
FBgn0010114	hig	37025	17278	15147	13460	38549	15755	26436	19315	22297	14236	15495	13863	26272	14312	18269	21170	12844	25455	17916	12774	30718	26838	16722	11274
FBgn0010173	RPA1	1790	966	959	828	2170	879	1683	1256	1177	906	1142	1277	1443	1148	1315	1387	1119	2065	1313	882	1728	1357	1404	916
FBgn0010194	Wnt5	2088	889	784	646	2141	701	1833	1243	1224	842	1065	1075	1311	717	1008	1086	773	1348	1267	731	1668	1200	935	709
FBgn0010197	Gyc32E	196	81	68	82	295	112	102	79	131	79	95	68	177	94	112	148	106	261	94	53	139	128	141	55
FBgn0010198	RpS15Aa	10590	7599	17190	17956	12371	12618	14144	14147	8402	7813	15673	17142	10826	11012	19529	18931	8945	14668	13999	13159	11689	9804	24727	13994
FBgn0010213	Sod2	5474	3435	3266	2673	4949	4299	5661	6607	3419	2542	4853	5875	4274	3577	4589	5337	3212	4938	5516	5460	6777	5710	7036	4671
FBgn0010215	alpha-Cat	6284	3094	3591	3332	7132	2870	6199	4571	3292	2859	3397	3982	5383	2722	4218	4675	3028	5858	4090	2033	6128	3660	3456	1777
FBgn0010217	ATPsynbeta	45355	25932	43111	34294	43716	26954	59802	51833	23493	20888	44506	38904	33664	19783	55374	56951	19589	30426	64273	48758	43392	29328	48739	26447
FBgn0010220	Dbp45A	1020	492	530	484	1382	780	855	912	649	524	621	745	639	458	526	584	576	824	568	477	830	653	602	362
FBgn0010222	Nmdmc	896	613	2778	614	1616	959	4733	5178	801	1031	4186	2490	1001	1585	3139	4269	1136	1868	1523	1354	944	903	7624	1910
FBgn0010223	Galphaf	106	48	49	39	110	44	31	14	56	31	39	22	47	39	78	71	41	37	46	30	38	35	49	40
FBgn0010225	Gel	6245	3813	13371	11074	6629	3518	9165	9155	6565	7228	8006	6196	6142	5855	22354	23612	3803	8809	6839	7136	5396	4799	21928	8192
FBgn0010226	GstS1	3475	1656	3203	2615	1189	387	2374	1814	1625	2148	4385	3599	1269	1007	3196	3239	1581	2413	6027	2716	1590	1365	2506	1201
FBgn0010228	HmgZ	15087	10333	6087	4949	23601	14436	14839	20254	12309	9100	13287	21560	15725	11356	10406	11520	12641	18071	12005	7379	19018	10616	10281	8371
FBgn0010235	Klc	6577	3908	3117	2586	7847	3224	5116	5376	4013	3560	4227	5134	4743	3816	3878	4306	2904	5396	3543	2916	5315	4357	3908	2696
FBgn0010238	Lac	1771	1016	1737	1535	2316	712	2008	1443	2149	1432	2139	2180	2032	1436	2654	2635	1253	2673	2747	2189	2131	1849	2648	1625
FBgn0010240	Lcch3	4078	1827	1490	1283	4481	1942	3293	2711	2326	1546	2144	2520	3100	1746	2047	2268	2207	2988	2489	1401	3220	2035	1590	1027
FBgn0010241	Mdr50	13	14	31	15	18	9	14	6	33	103	223	178	3	3	14	27	15	39	21	24	53	49	1459	396
FBgn0010246	Myo61F	55	21	252	260	38	48	27	20	87	49	131	201	80	69	147	89	51	104	91	69	60	75	299	96
FBgn0010247	Parp	1360	746	936	826	1578	689	1314	888	748	522	866	944	891	389	679	772	689	961	868	375	1534	717	850	431
FBgn0010258	Rbp4	18	6	9	8	32	9	9	13	8	9	10	10	18	24	5	8	15	14	10	2	33	20	8	3
FBgn0010263	Rbp9	25462	13024	26141	21956	28898	13724	36145	24708	22290	15756	22102	21226	31244	20398	35395	37068	16434	27458	25775	18056	39460	27969	25044	14354
FBgn0010265	RpS13	13351	8505	16585	15385	17870	10398	16817	18452	10429	8533	21251	23457	13436	15300	25921	26825	10552	20615	18911	19738	11670	11143	29143	16459
FBgn0010269	Dsor1	2987	1602	850	866	3407	1812	2395	2324	1752	1416	1474	1871	2070	1579	1353	1559	1437	2419	1436	1061	2037	1788	1230	1038
FBgn0010278	Ssrp	1785	1225	676	663	2699	1662	1256	1309	1769	1078	1010	1367	1223	1428	757	840	1429	1741	764	567	1284	1140	773	695
FBgn0010280	Taf4	8489	3418	3450	3358	9660	3363	6487	4046	5571	3611	3977	4495	6775	3258	4352	5038	3995	7523	4129	2718	6255	5094	3315	2424
FBgn0010282	TfIIFalpha	2515	1413	821	679	3765	1850	1862	1957	1773	1141	1451	1851	1745	1479	1195	1250	1602	1854	1168	981	1825	1509	1176	998
FBgn0010287	Trf	256	195	148	167	285	180	235	192	121	104	147	148	177	120	179	156	118	273	118	113	230	171	167	90
FBgn0010288	Uch	3100	1668	1010	934	2075	1398	1869	1623	1081	1969	1245	1357	1445	1076	1356	1463	957	1506	1825	868	824	1030	776	506
FBgn0010292	bys	670	444	465	420	841	590	605	683	491	404	440	560	593	537	621	651	369	744	559	451	564	594	593	363
FBgn0010294	ng2	0	3	0	0	0	0	3	6	2	5	2	1	1	0	1	4	2	0	0	0	0	1	1	0
FBgn0010295	ng3	0	0	0	0	0	0	0	0	0	0	0	0	0	0	0	0	2	0	0	0	0	0	0	0
FBgn0010296	ng4	0	0	0	0	0	0	0	0	0	1	0	0	0	0	0	0	0	0	0	0	0	0	0	0
FBgn0010300	brat	7665	3456	2550	2294	11112	3709	6432	3227	4649	3432	4394	5235	6209	3040	2788	3457	3695	6415	3166	1191	6512	2878	2126	1667
FBgn0010303	hep	6019	2260	2467	2160	6863	2009	4840	3056	4084	2704	3566	3387	4638	2570	3337	3614	2979	5135	3292	2372	3584	3215	2382	1785
FBgn0010309	pigeon	1385	606	863	677	1864	728	1542	1368	827	668	920	819	1068	620	982	1232	572	1100	1038	813	1366	1138	913	598
FBgn0010313	corto	8091	2773	3730	3186	6001	2066	7123	3889	4724	3291	5801	5435	6640	3101	5546	6121	3603	5881	5317	3362	6310	3948	4123	2717
FBgn0010314	Cks30A	17	21	11	6	7	24	10	5	26	6	28	19	8	1	13	7	2	24	22	9	22	16	8	4
FBgn0010315	CycD	187	109	205	194	177	50	165	123	117	144	161	157	152	102	241	215	101	214	215	152	167	135	224	147
FBgn0010316	dap	240	126	322	230	166	132	212	162	119	103	241	203	278	322	429	570	119	241	255	175	259	162	266	161
FBgn0010317	CycJ	138	92	68	68	216	60	100	103	104	48	90	97	115	96	83	81	83	239	94	69	180	153	69	56
FBgn0010323	Gsc	172	82	53	31	212	74	115	94	94	73	46	99	102	79	77	73	79	113	60	48	121	57	52	25
FBgn0010328	woc	4663	1984	2441	2262	5306	2079	3615	2076	3076	1964	1824	1907	3987	2164	2915	3052	2080	3853	2299	1929	3642	3548	2363	1398
FBgn0010329	Tbh	2904	1086	1135	915	4029	1396	2875	1961	2003	1206	1561	1706	2808	1448	1851	1860	1457	2726	1705	1038	2430	1624	1182	763
FBgn0010333	Rac1	3097	1559	1628	1554	2463	1164	2221	1614	1466	1004	1612	1684	2168	1202	1914	1981	1100	1807	1929	1180	2144	1433	1594	962
FBgn0010339	128up	943	586	663	561	1181	949	885	866	619	589	683	908	865	675	767	774	616	993	627	472	803	616	698	447
FBgn0010340	140up	468	269	212	199	588	264	572	539	303	193	341	464	429	284	399	419	220	400	405	234	408	283	333	175
FBgn0010341	Cdc42	3565	1543	2106	1889	3455	1180	3518	2549	1913	1580	2484	2982	3021	1637	2907	3156	1844	3424	2819	1579	3247	2084	2584	1362
FBgn0010342	Map60	1387	701	424	395	1658	862	1078	963	861	588	691	785	1219	836	721	876	537	1006	635	530	1121	991	566	492
FBgn0010348	Arf1	12041	6379	7717	6474	12153	4819	11324	9734	7345	5762	9558	11536	10586	6652	11289	11995	6274	11555	10197	6628	11945	7783	10702	5700
FBgn0010350	Cds	17305	8598	17029	14275	11449	6651	26814	16935	9279	7442	14412	12012	17396	6998	26002	26511	8488	12558	22978	13953	22220	11428	17271	8800
FBgn0010352	Ogdh	29145	15360	26749	21506	25315	11652	32653	23616	16193	13777	23323	24458	25507	13144	31777	34600	13328	23945	26544	22226	26414	19610	28270	15805
FBgn0010355	Taf1	4050	1959	2006	1803	5603	2238	3680	2699	3182	2445	2632	3179	3445	2138	2538	2841	2041	3985	2213	1630	3326	2887	1801	1237
FBgn0010356	Taf5	843	437	442	348	885	503	762	704	534	463	516	517	729	497	728	735	421	883	579	521	800	741	565	333
FBgn0010357	betaTry	1	1	6	158	15	0	6	0	24	38	4	0	0	0	0	0	0	0	3	3	0	0	0	0
FBgn0010379	Akt	2120	943	1785	1258	2594	732	2093	1416	1427	1164	1740	1665	1924	1023	1942	1914	1219	2110	1749	848	2249	1245	1906	885
FBgn0010380	AP-1-2beta	8336	3978	4308	3746	8814	3831	7816	6683	4694	4199	5001	5090	6527	4076	5684	6181	3405	6490	5977	4693	7031	6393	5138	3278
FBgn0010382	CycE	130	28	61	46	809	145	1428	593	60	44	70	60	86	46	52	64	43	94	87	38	83	40	44	24
FBgn0010383	Cyp18a1	174	58	631	610	81	24	194	120	276	164	949	1085	268	161	610	540	195	233	612	404	113	64	894	379
FBgn0010385	Def	78	52	206	77	395	2563	248	181	164	225	169	460	411	957	189	318	89	263	154	98	243	157	141	173
FBgn0010387	Acbp2	925	1006	2152	2277	1021	681	1480	2149	1057	1069	3465	3487	935	1175	4129	3665	698	1092	1840	2097	932	948	2991	1491
FBgn0010388	Dro	564	839	1352	160	1988	546	393	340	160	105	9125	346	250	627	176	619	936	1648	767	1721	234	138	63	27
FBgn0010389	htl	691	379	745	615	557	213	803	647	553	335	462	471	498	269	585	623	326	584	497	346	560	339	676	341
FBgn0010391	SrpRalpha	2224	1490	1805	1664	2526	1509	2404	2027	1755	1840	1806	1565	1983	1613	2121	2158	1372	2162	1779	1782	1851	1697	2052	1383
FBgn0010395	Itgbn	14	14	13	13	28	3	10	19	11	11	12	10	20	28	27	49	27	42	11	8	10	11	16	6
FBgn0010397	LamC	1882	927	1514	1354	2046	773	1728	1412	1347	1232	1806	1854	1694	1453	2012	2149	1094	2134	2181	1908	1398	1527	2116	1304
FBgn0010398	Lrr47	199	122	107	104	371	205	253	214	153	119	182	212	205	165	168	182	112	244	177	126	207	180	154	69
FBgn0010399	Nmdar1	4694	2185	1952	1613	9211	3178	6240	4364	2588	2179	2590	2685	3916	2009	2461	2841	1934	4057	2621	1822	3870	3029	1870	1206
FBgn0010401	Os-C	56	315	506	206	124	1	47	530	203	40	6	352	252	98	781	784	34	20	19	206	0	202	438	32
FBgn0010403	Obp83b	71	277	414	214	108	10	24	330	201	52	15	314	342	4	440	412	24	10	1	169	10	131	287	18
FBgn0010406	RNaseX25	1570	783	1773	1397	1583	672	1745	1401	981	877	1407	1109	1455	896	1829	2006	735	1436	1468	1238	1861	1230	1835	919
FBgn0010407	Ror	897	512	299	244	1138	536	661	590	555	422	430	514	739	474	418	460	462	831	378	231	821	653	351	181
FBgn0010408	RpS9	17585	15436	26295	27224	18371	18404	19479	21712	9778	13860	24400	27082	16745	23476	27897	28833	16245	27303	20591	23199	17982	17875	36583	21854
FBgn0010409	RpL18A	17334	10308	19171	18877	24502	14429	17667	18987	13874	11854	21481	24643	15410	18117	26715	25827	12958	22631	18339	19228	12372	12232	32554	16809
FBgn0010411	RpS18	21155	20539	27281	27605	27550	25473	28436	38001	13414	15538	20500	23219	18375	24984	31673	36709	16382	30159	22223	26545	21818	23408	40359	26844
FBgn0010412	RpS19a	14071	10545	19438	19263	18987	13030	16354	18529	11529	10917	21317	23184	13430	16798	22471	22559	11280	20687	16703	19068	11163	11414	28148	15825
FBgn0010414	SerT	1121	609	512	394	1416	479	1112	967	770	636	751	741	988	511	865	939	564	1086	944	764	1153	918	712	542
FBgn0010415	Sdc	30686	16424	12047	10222	40680	16674	26572	19903	14833	10789	17794	23738	24649	16017	16330	18844	17235	28830	17178	9303	25386	13132	12905	9045
FBgn0010416	TH1	756	375	522	476	935	359	762	547	438	387	478	385	684	442	721	710	355	669	615	380	774	466	661	363
FBgn0010417	Taf6	1538	684	685	568	1861	822	1232	1141	994	748	1153	1140	1594	1232	1305	1563	976	1972	1582	1215	1267	1029	1015	669
FBgn0010421	TfIIFbeta	684	380	331	318	800	249	621	480	399	323	469	518	552	358	456	527	321	546	428	323	579	445	441	340
FBgn0010422	TfIIS	1977	1095	1039	997	2022	1309	1684	1900	1318	1011	1266	1628	1619	1297	1356	1547	1115	1665	1201	1084	1526	1471	1187	870
FBgn0010423	TpnC47D	468	91	14	13	64	14	32	13	10	97	98	84	23	18	31	28	52	19	200	28	20	31	11	5
FBgn0010424	TpnC73F	416	240	226	223	941	355	365	314	308	384	432	637	371	301	254	268	201	437	263	224	218	219	143	127
FBgn0010425	epsilonTry	0	3	0	30	0	0	2	0	2	0	0	0	0	3	0	0	0	0	0	0	0	0	1	0
FBgn0010431	mtrm	7	2	27	10	0	0	7	14	12	16	5	19	1	0	5	1	7	4	2	2	10	0	4	0
FBgn0010433	ato	30	23	8	4	52	30	36	41	19	11	11	31	13	11	10	24	16	25	18	20	35	25	11	5
FBgn0010434	cora	12482	5754	7187	6279	13542	4733	9790	7391	9437	6437	7410	8883	11210	6773	8931	9657	6924	14178	9462	7325	10051	8917	7499	4890
FBgn0010435	emp	2343	1140	4820	3892	2916	1623	4139	2779	3043	2786	4434	4832	4177	2810	11536	9832	2693	5522	6086	4763	2836	2638	7922	3456
FBgn0010438	mtSSB	295	181	142	117	434	258	247	252	212	174	209	288	375	339	244	235	252	446	218	180	201	211	180	102
FBgn0010441	pll	384	208	276	252	402	225	330	310	254	240	289	280	280	246	446	409	229	367	314	278	276	253	374	249
FBgn0010452	trn	1909	781	854	747	1656	939	1528	1082	1056	850	1269	1218	1386	722	1061	1256	826	1430	1253	840	1334	1088	843	550
FBgn0010453	Wnt4	1719	757	529	517	1557	592	1017	721	844	503	795	1016	954	533	579	700	529	857	608	353	1027	730	571	528
FBgn0010470	Fkbp14	1091	622	1420	1355	1166	701	1448	1607	1159	1080	1814	1900	1158	1144	3186	3064	924	1676	1974	1827	881	608	2579	1281
FBgn0010473	tutl	23020	8292	9017	7715	26157	10357	19486	11516	13327	8371	11745	12929	15368	6203	9503	11270	9219	14321	12454	5813	20555	13011	8093	6302
FBgn0010482	hlk	2254	1049	2121	1846	2075	846	2211	1494	1289	1204	1942	2749	1465	780	1361	1606	1241	1780	2421	1360	1602	1283	1425	843
FBgn0010488	NAT1	18880	7065	12259	10276	18738	6767	17023	10822	10611	8436	11059	10426	13080	6860	14206	14906	7983	13578	14157	8984	15322	12243	12604	7320
FBgn0010497	dmGlut	135	38	277	117	75	68	150	70	115	59	192	178	91	53	181	159	76	68	124	121	65	80	140	76
FBgn0010501	Dcp-1	450	262	164	127	663	175	423	466	322	255	318	407	351	259	249	277	184	427	273	200	441	435	230	156
FBgn0010504	kermit	170	61	141	92	221	97	111	87	70	61	207	93	113	74	124	168	104	175	202	135	397	164	734	485
FBgn0010516	wal	3472	2715	5280	4918	3257	2878	4641	4986	2359	2504	4631	4317	3273	3206	7116	7182	2305	3949	4387	4386	2619	2348	6507	3072
FBgn0010520	Bka	364	224	200	161	408	320	329	228	187	225	236	249	302	191	236	261	192	288	213	179	279	205	207	187
FBgn0010531	Ccs	652	458	355	367	677	433	629	693	407	403	529	501	573	458	595	568	348	551	398	289	476	426	463	332
FBgn0010548	Aldh-III	4122	2315	3718	3452	4426	2527	3968	3487	2863	2321	3761	3808	4141	2786	7762	7057	2414	5009	3969	3587	3708	3700	6543	3598
FBgn0010549	l(2)03659	53	36	43	28	2	33	5	3	6	1	7	13	16	10	4	4	11	1	10	16	15	8	18	12
FBgn0010551	Phb2	4092	2527	2473	2315	4439	2447	3876	3707	2700	2422	3359	3866	3310	2727	3368	3576	3103	4748	4147	2901	3696	2901	3279	1966
FBgn0010583	dock	4635	2160	2412	2197	4821	2045	4217	3000	3131	2192	2586	2199	3440	1715	2829	3183	1809	3429	2618	1878	4080	3415	2482	1465
FBgn0010590	Prosbeta1	2722	1642	1173	1030	1780	1766	1768	1379	1057	2118	1429	1715	1286	1341	1633	1611	1115	1593	1917	1100	1428	1595	1876	1013
FBgn0010591	Sply	1822	981	1588	1284	1792	760	1463	1250	1204	1111	1284	1078	1572	962	1832	2053	878	1714	1301	1099	1336	1122	2034	1005
FBgn0010602	lwr	4326	2494	1653	1522	4599	2383	4037	4429	2702	2009	3170	3928	3484	2533	2976	3193	2356	3769	3075	2624	3274	2693	2612	1821
FBgn0010607	l(2)05714	539	351	274	216	732	380	452	414	337	283	334	499	496	434	331	382	296	517	390	279	480	357	308	214
FBgn0010611	Hmgs	1664	938	1578	1423	1761	781	1838	1727	1106	1078	1630	1642	1513	1068	2282	2487	937	1833	1860	1484	1275	1061	1953	1244
FBgn0010612	ATPsynG	9512	7119	6922	6042	7746	8325	10749	11589	4706	4568	10573	12945	7008	5804	8779	9913	5979	8259	11324	10909	9430	7019	10074	6804
FBgn0010620	CG10939	1084	529	1017	691	1179	462	884	703	800	582	1105	1189	1055	746	1452	1292	730	1188	1454	1099	1381	910	1764	996
FBgn0010621	CCT5	1945	1234	1676	1800	3030	1570	1954	1826	1572	1397	1314	1154	1663	1697	1782	1819	1134	2336	1462	1413	2027	1998	1975	1287
FBgn0010622	DCTN3-p24	1071	753	588	600	1814	861	1338	1685	778	667	817	931	1041	816	821	863	641	975	792	683	1055	917	861	586
FBgn0010638	Sec61beta	2237	1494	1848	1803	2913	1381	2045	2116	1419	1129	1848	2123	2048	1618	2125	2225	1092	2329	1845	1513	1774	1501	2184	1407
FBgn0010651	MFS14	1044	515	1431	1098	1056	583	1564	1294	883	1159	1495	1603	1231	1053	2128	2122	843	1955	1403	1145	596	510	1830	1039
FBgn0010660	Nup214	1579	710	667	565	2081	906	1354	1057	1177	790	845	1033	1506	857	1040	1257	958	1949	1073	735	1300	1039	749	474
FBgn0010741	Pfdn2	1299	839	800	682	1757	1518	1386	1539	884	655	1015	1192	1102	919	945	992	836	1173	912	699	1302	842	1036	573
FBgn0010747	Srp54k	2756	1360	1720	1589	2957	1588	2595	2004	1581	1194	1833	1677	2144	1191	2514	2396	1327	2029	2120	1576	2138	1612	2330	1125
FBgn0010750	atms	1676	1004	776	715	2068	844	1371	1271	1145	960	1153	1325	1400	1063	1045	1102	846	1370	889	721	1458	1329	974	717
FBgn0010762	simj	11073	4219	3567	3357	3929	1099	3037	1500	2168	1544	1798	1968	3186	1495	1957	2267	1595	3139	1960	1151	3047	2319	1464	1071
FBgn0010768	sqz	828	347	466	344	696	323	661	491	431	273	386	418	578	261	474	539	266	655	418	306	646	578	395	297
FBgn0010770	ppan	483	272	220	213	718	266	380	377	378	243	281	327	350	300	265	303	219	433	268	224	362	384	311	169
FBgn0010772	Xe7	20624	8973	5216	4988	24478	8154	12659	10543	12958	8956	8953	12217	14880	9490	7181	8767	8938	15803	6907	5210	12171	11284	5620	4998
FBgn0010774	Ref1	4534	2528	2292	2164	6126	2419	4377	3849	2946	2376	2946	3387	3875	2772	3037	3390	2484	4629	2903	2390	3396	2905	2826	1836
FBgn0010786	l(3)02640	5378	2872	2679	2475	6073	3342	4837	4363	2942	2425	2650	2648	4092	2752	4190	4312	2632	4905	3623	2966	4635	4129	3333	2141
FBgn0010803	TrpRS	1080	649	582	535	1186	650	1048	1078	702	756	850	899	1029	808	895	919	736	1167	923	676	1033	756	845	506
FBgn0010808	Chchd3	4652	3136	2820	2549	5409	3958	5346	6346	3734	2753	5268	6916	4398	3833	4678	5400	3538	4685	5237	4674	4347	3535	4569	3361
FBgn0010825	Gug	9206	2730	3445	2904	9358	2060	6812	3482	5684	3285	4646	3870	6813	2796	4195	4745	3592	6218	4421	2680	6717	4926	3209	2156
FBgn0010830	l(3)04053	1472	706	631	602	2030	544	1427	1209	1327	912	827	947	1221	787	977	1067	745	1345	876	701	1350	1171	864	579
FBgn0010877	l(3)05822	2592	1283	1619	1294	3306	1324	2598	1952	1599	1222	1480	1349	2183	1203	2069	2282	1205	2125	1914	1437	2282	1725	1675	1102
FBgn0010894	sinu	545	283	429	376	529	229	546	409	293	301	501	585	503	288	522	521	310	606	552	310	654	468	457	275
FBgn0010905	Spn	16775	6085	5568	5071	21072	6607	13372	7326	8678	5082	6888	7522	15036	8072	7968	10197	10419	17531	8921	5233	11370	7702	4672	3518
FBgn0010909	msn	7874	3181	4073	3561	9622	2987	5986	3894	5512	3734	4309	5188	5590	3015	4346	4623	3544	6184	4539	2591	5911	4313	3716	2213
FBgn0010926	l(3)07882	743	338	426	379	841	560	603	457	504	401	370	453	594	399	508	585	380	627	413	278	564	470	442	312
FBgn0011016	SsRbeta	1692	1059	1453	1602	1817	1078	1722	1679	1406	1169	1576	1875	1377	1267	1632	1792	960	1955	1526	1428	1324	1321	1960	1134
FBgn0011020	Sas-4	299	179	124	122	518	125	244	219	290	190	196	192	288	206	195	199	176	323	184	162	313	265	157	102
FBgn0011202	dia	1812	964	1573	1266	2187	1016	1934	1608	1386	937	1216	1063	1585	1017	1790	1828	1005	1783	1533	1210	1215	1141	1182	673
FBgn0011204	cue	2314	954	1712	1371	2042	723	2147	1509	1616	1424	1787	1629	1740	1004	2023	2320	842	1856	2188	1690	1801	1526	2352	1244
FBgn0011205	fbl	1941	1122	2566	2094	1850	983	1872	1817	1391	1242	1712	1609	1465	1162	3430	3228	1043	1961	1924	1551	1510	1238	2941	1240
FBgn0011206	bol	30740	15665	9931	8423	30521	12485	25847	14617	16427	14583	21421	32006	25168	11369	13782	17222	14987	26074	16656	6618	29954	13593	10874	7749
FBgn0011207	pelo	1107	567	711	645	1517	834	1171	912	710	694	739	756	1051	597	974	984	605	1159	862	689	1070	788	831	381
FBgn0011211	blw	66298	32646	45440	36610	60418	35622	79253	67684	40382	32165	82179	92716	51458	30357	69146	76577	32263	49801	98753	86431	59428	45481	65588	40279
FBgn0011217	eff	14007	6874	8522	6523	12131	3428	13575	11966	8083	9578	12406	15129	14164	9382	13612	14459	8003	14282	14753	8708	13965	9419	12532	7635
FBgn0011224	heph	18430	8126	6755	5889	18722	7813	14422	7060	9539	7796	10295	10627	13059	6037	7341	8901	8176	13459	8852	3961	16477	8469	6240	4287
FBgn0011225	jar	12375	5909	7303	6759	12679	5676	13728	12315	7654	6392	8994	8897	9830	5644	11395	12332	6269	10753	12332	9021	10348	8213	9181	6088
FBgn0011227	ox	1722	1196	1862	1330	1921	1640	2396	1842	1318	802	1973	2614	1384	1361	1498	1591	773	1015	1475	1587	1277	1279	1422	1022
FBgn0011230	poe	11586	5164	8660	6654	11585	4110	9853	6530	7044	6316	7055	7404	9039	5187	9114	9291	5130	9792	8666	6023	9420	8192	7641	4422
FBgn0011232	scat	1592	731	893	790	2000	1055	1613	1307	1213	826	1004	1021	1646	839	1324	1372	857	1551	1221	863	1376	1199	980	592
FBgn0011236	ken	456	181	364	335	346	84	412	194	302	287	458	365	393	215	599	616	225	495	754	466	337	331	574	378
FBgn0011239	ms(2)35Ci	0	1	0	1	0	0	0	0	0	0	1	0	0	0	0	0	4	0	0	0	0	0	0	0
FBgn0011244	Hsp60B	3	4	0	0	3	0	0	0	1	5	0	0	0	2	2	0	0	0	2	0	0	0	0	0
FBgn0011259	Sema1a	10540	5055	3952	3409	8626	3455	6876	3898	5867	4782	6312	8614	8234	4076	4266	5528	5240	8640	5174	2091	7776	3955	2797	2162
FBgn0011260	Sema2a	1840	828	997	792	1962	1093	1802	1063	1038	931	1411	1555	1438	706	1192	1334	839	1678	1537	897	2029	1268	1242	660
FBgn0011270	Pglym87	0	0	0	0	1	0	8	4	2	0	3	0	0	5	0	0	2	0	4	1	1	3	3	0
FBgn0011272	RpL13	33318	25734	33412	33540	49321	32437	36209	48196	26260	25316	34956	39871	29399	36181	40909	46524	23075	48733	31475	34970	27392	29333	49255	30551
FBgn0011274	Dif	2599	1162	2298	1703	2708	903	2246	1361	1591	1612	2162	2459	2272	1439	3298	3369	1570	2948	2728	2058	2177	1835	2997	1399
FBgn0011276	HLH3B	141	97	59	58	155	71	100	125	51	62	83	128	117	98	44	83	76	155	86	57	89	68	62	47
FBgn0011277	HLH4C	64	29	24	25	108	83	48	72	44	33	58	66	45	33	40	37	34	57	54	23	42	32	15	10
FBgn0011278	lbe	1	0	2	2	6	0	0	0	0	5	0	0	4	0	5	4	2	2	2	5	3	0	1	7
FBgn0011279	Obp69a	159	152	149	101	103	114	59	137	70	36	72	205	256	129	133	165	118	163	37	47	91	115	78	43
FBgn0011280	Obp19d	13609	9589	9900	8025	10575	9057	10533	12009	13323	8558	13787	16837	14564	12202	28157	24318	11957	17934	8983	12063	17850	16781	24919	15039
FBgn0011281	Obp83a	188	580	723	318	231	157	84	839	268	94	27	736	772	14	813	853	79	36	17	453	27	356	828	28
FBgn0011282	Obp84a	9	20	66	33	41	0	2	11	9	13	4	24	4	0	25	36	0	1	0	12	2	19	30	0
FBgn0011283	Obp28a	154	170	346	178	68	29	113	257	128	88	37	296	161	59	443	301	34	33	83	216	35	194	408	48
FBgn0011284	RpS4	25274	17698	35634	36620	33487	21751	31155	30781	21756	22425	34842	39417	22712	26847	41702	43640	18319	37248	30551	32869	21502	21496	46691	25910
FBgn0011286	RyR	8763	3067	5053	4141	10725	3589	8975	5061	5215	3890	5696	6551	5763	2419	3559	4256	3268	5767	4725	3339	5886	5017	3386	2225
FBgn0011288	Snap25	22636	12031	11138	9938	23332	10021	22896	11719	9709	8061	12853	13178	13057	5863	10742	10713	7794	12836	13248	5052	23443	10109	10821	5192
FBgn0011289	TfIIA-L	2957	1654	1712	1458	3212	1882	2555	2481	1902	1622	2069	2535	2596	2274	2460	2698	1704	2862	1956	1758	2334	2195	2313	1346
FBgn0011290	Taf12	3001	1837	1107	1042	3483	1923	2495	2627	1698	1613	1896	2689	2570	2088	1715	2029	1622	2861	1675	1291	2397	2112	1517	1224
FBgn0011291	Taf11	456	322	193	202	579	603	440	489	268	273	321	368	412	356	302	354	308	441	311	283	405	364	279	210
FBgn0011293	a10	98	344	466	179	254	0	9	538	173	77	1	407	214	4	419	506	20	1	2	193	2	277	322	6
FBgn0011294	a5	13	27	116	34	96	1	10	146	39	10	0	101	44	0	70	100	0	0	0	21	0	116	135	1
FBgn0011296	l(2)efl	3300	1890	3182	2860	3500	2178	2479	2690	1210	1083	3103	3166	1537	1640	1172	1648	1638	1964	2002	2050	2352	2046	2570	2076
FBgn0011297	Alg3	470	233	420	386	498	322	472	533	427	412	398	418	402	356	548	512	273	471	371	345	578	589	669	347
FBgn0011300	babo	3586	1875	2537	2095	3986	1691	3639	2262	2020	1912	2384	2883	3344	1633	3022	3281	2042	3732	2766	1555	3587	2270	2144	1216
FBgn0011305	Rsf1	4827	2918	2535	2376	5219	3481	5835	4441	3126	2774	4273	5115	4816	2732	3768	4225	2651	4127	3405	2582	5464	3848	3589	2185
FBgn0011327	Uch-L5	1790	778	395	316	910	621	842	806	460	1544	513	590	700	602	757	684	462	660	1002	383	791	928	734	418
FBgn0011335	vers	1050	689	493	476	1513	907	770	1069	713	481	564	707	696	509	564	652	511	808	572	392	938	660	584	376
FBgn0011336	Stt3B	1374	661	1760	1604	1311	664	1744	1285	1209	873	1410	1483	1363	884	2166	2082	766	1422	1491	1253	1515	1217	2418	1252
FBgn0011361	ND-ACP	5291	3903	3502	3115	6386	7167	7387	8850	3677	3230	7362	9389	4598	4248	5970	6922	3207	4886	7577	6621	5025	4217	5735	4237
FBgn0011455	ND-SGDH	4945	3366	4452	4070	4333	3800	6190	5972	3053	2735	5864	6702	3762	3187	4486	5106	2665	3822	4910	4169	4321	3524	5316	3228
FBgn0011474	PR-Set7	1426	509	590	487	1148	264	1113	664	534	654	608	545	692	314	669	705	514	760	923	446	1002	730	554	257
FBgn0011476	l(3)neo43	321	364	201	210	542	533	531	699	206	221	352	498	341	350	289	344	248	394	338	232	579	460	340	261
FBgn0011481	Ssdp	10348	4057	3594	3324	11917	4325	9042	5383	7292	4114	6118	6665	7573	3680	5195	5495	4515	6352	4979	2633	8282	4448	4067	2686
FBgn0011509	SrpRbeta	729	403	427	423	902	448	644	731	704	527	584	699	646	461	520	548	436	624	451	345	575	433	521	335
FBgn0011554	etaTry	0	0	0	2	0	0	1	0	1	2	0	0	0	0	0	0	0	0	0	1	0	0	0	0
FBgn0011555	thetaTry	1	0	0	0	0	0	0	0	0	0	0	0	0	0	0	0	0	0	1	0	0	0	0	0
FBgn0011556	zetaTry	0	0	0	1	0	0	0	0	0	0	0	3	0	0	1	0	0	0	0	0	0	0	0	0
FBgn0011559	Acp36DE	14	5	5	3	7	0	16	0	3	7	8	0	9	2	2	2	5	3	18	16	4	3	0	0
FBgn0011566	Smyd3	1037	579	554	462	1122	620	858	953	543	369	547	576	626	439	515	667	376	642	543	482	890	753	667	441
FBgn0011569	can	1	1	0	0	1	0	3	0	0	1	2	3	2	3	4	1	7	8	3	0	3	1	0	3
FBgn0011570	cpb	1474	1095	975	960	1690	940	1523	1347	1073	1014	1243	1332	1206	868	1106	1211	901	1473	1157	949	1330	1216	1082	853
FBgn0011573	Cdc37	2934	1721	1597	1634	3484	2228	2562	2847	2384	1719	1825	2050	2441	2039	1981	2073	1758	2579	1961	1529	2482	2390	2215	1643
FBgn0011576	Cyp4d2	2390	1340	1441	1301	2878	1386	2029	2212	2121	2396	1777	1833	1625	1314	2322	2371	1073	2211	1801	1232	1166	1056	2141	1181
FBgn0011581	Ms	13239	10572	4506	4242	23958	13639	8978	9629	7901	6900	5782	8163	11727	12470	5141	6230	8100	16742	3790	3267	9151	8937	4152	3262
FBgn0011582	Dop1R1	3910	1557	1602	1306	3021	1576	2303	1263	1718	1376	1697	2140	2473	1194	1365	1689	1356	2658	1702	755	3355	1840	1289	779
FBgn0011584	Trp1	4513	2793	4358	3843	5423	3641	5709	4904	3253	2409	4269	3772	4420	2874	6574	6318	2698	3867	4447	3235	5135	3420	6393	3308
FBgn0011586	e(r)	2386	1389	1492	1308	2844	1392	2387	2785	1596	1325	1854	2649	2273	1753	1925	2060	1262	2390	1659	1059	2605	1831	1678	1220
FBgn0011589	Elk	2874	1236	1185	1081	4289	1403	2362	1728	1753	1513	1465	1664	2158	1011	1191	1393	1531	3099	1634	956	2261	1919	913	626
FBgn0011591	fng	1464	766	1108	922	1730	707	1931	1459	778	710	845	944	1006	697	1325	1359	693	1314	1279	764	1089	916	962	631
FBgn0011592	fra	1240	473	791	590	2268	754	1525	945	866	620	714	505	1193	454	876	1033	502	1111	1002	506	1329	905	630	363
FBgn0011596	fzo	106	18	31	30	97	0	142	19	55	14	32	13	60	7	57	64	51	53	29	23	30	33	20	18
FBgn0011603	ine	1822	779	1661	1388	789	491	1295	789	1465	1129	1495	1760	1358	893	1775	1728	885	1711	1886	1685	1151	923	1397	873
FBgn0011604	Iswi	2921	1168	1343	1241	3626	1516	2547	1939	1949	1197	1346	1567	2427	1387	1715	1758	1309	2235	1543	1013	2458	1754	1273	805
FBgn0011606	Klp3A	93	44	57	52	147	80	106	97	82	63	82	54	131	77	105	104	63	157	84	38	61	71	53	69
FBgn0011638	La	2729	1865	1484	1403	3562	1841	2738	2676	1845	1696	1716	2305	2557	2133	2046	2108	1856	3163	1994	1475	2589	2173	2216	1415
FBgn0011640	lark	5964	2778	2391	2046	6515	2417	5055	3836	3839	3165	3800	4476	4853	3564	3661	4004	2863	5642	2944	2509	4211	3403	2802	2029
FBgn0011642	Zyx	6008	3567	3117	2691	7622	3590	5657	3704	3195	2851	3500	4153	4663	2453	3719	3951	2689	5666	3457	1663	5635	3208	3128	1549
FBgn0011648	Mad	1699	987	1487	1351	1924	1193	1955	1178	941	1010	1201	1390	1674	1068	1710	1796	1041	1868	1616	1122	1958	1339	1514	934
FBgn0011653	mas	1	0	0	0	0	0	0	5	0	0	2	0	2	0	1	0	0	1	2	0	0	0	2	3
FBgn0011655	Med	3636	1416	1218	1078	4117	1168	2820	2071	2307	1704	1835	1682	2711	1766	1988	2001	1489	2729	1734	1392	2663	2440	1792	1164
FBgn0011656	Mef2	5389	2272	3247	2709	5133	2109	4868	3190	3009	2267	3241	3439	4101	1941	3659	4024	2577	4254	3885	2246	4823	3161	2858	1682
FBgn0011659	Mlh1	130	86	62	67	164	47	122	145	76	67	73	87	152	113	92	102	86	136	84	67	106	93	86	42
FBgn0011660	Pms2	453	287	190	166	718	309	409	328	421	306	226	420	392	276	251	300	358	560	255	167	418	298	198	141
FBgn0011661	Moe	25443	15096	15421	14557	35426	16912	30392	28191	22310	16338	23746	25719	25212	18667	23837	26346	19287	27412	20500	15917	22282	17288	18310	14815
FBgn0011666	msi	9787	4208	3787	3193	8109	3821	10003	4836	4677	3720	6561	6927	9672	4144	6070	7095	4977	8323	6707	2955	9431	4137	4048	2386
FBgn0011668	Mst57Da	1	0	0	0	11	0	0	0	1	0	4	0	0	0	0	0	0	0	6	2	0	0	0	0
FBgn0011669	Mst57Db	0	0	0	0	2	0	2	0	0	0	2	0	0	0	0	0	0	0	6	1	0	0	0	0
FBgn0011670	Mst57Dc	1	0	0	0	0	0	1	0	1	0	0	0	0	0	0	0	0	0	3	0	0	0	0	0
FBgn0011672	Mvl	2159	1024	1829	1259	2012	884	2054	1370	1613	1463	1423	1322	2054	1238	2042	2129	993	2007	1758	1063	1952	1454	1978	1017
FBgn0011674	insc	133	34	146	89	138	92	90	74	89	117	154	152	142	86	198	178	88	209	170	118	111	74	205	103
FBgn0011676	Nos	5918	2453	1799	1684	5332	2324	3987	2830	2859	1985	2082	2465	3162	1699	2221	2405	1974	3399	2448	1499	4017	3536	1891	1384
FBgn0011692	pav	7	0	8	3	11	10	2	2	8	6	3	5	12	0	5	4	3	36	3	2	6	5	3	6
FBgn0011693	Pdh	49185	28923	43964	41250	26844	22615	59162	66303	28589	28575	64624	60404	37482	20887	56574	53694	26310	35064	86663	61478	67776	44497	73275	38092
FBgn0011694	EbpII	1	0	0	0	6	0	1	0	0	0	1	0	0	0	1	0	0	0	3	4	0	0	0	0
FBgn0011695	EbpIII	17683	12991	28699	23901	23991	15295	19758	23429	21242	18766	36139	42446	25821	33274	56674	50649	20668	41900	34205	32911	16538	18775	49700	28320
FBgn0011701	repo	2338	1138	1375	1296	2417	1076	2533	2191	1663	1239	1319	1532	2287	1309	1957	2098	1192	2408	1622	1430	1736	1401	1513	901
FBgn0011703	RnrL	175	90	98	64	122	22	43	70	90	115	91	137	118	143	127	118	58	161	151	98	126	95	126	88
FBgn0011704	RnrS	73	41	127	78	53	24	43	27	61	62	72	83	60	32	123	88	63	93	147	110	64	54	122	49
FBgn0011705	rost	125	80	843	1195	185	79	203	104	106	110	631	785	161	130	802	494	160	224	614	373	143	114	1400	418
FBgn0011706	rpr	206	96	87	66	261	99	153	161	101	63	126	147	143	64	73	64	114	143	201	44	125	60	55	41
FBgn0011708	Syx5	2389	1194	1555	1443	2561	1179	2389	2015	1511	1312	1724	1839	2261	1465	2234	2406	1433	2425	2130	1459	2184	1719	2115	1243
FBgn0011710	Septin1	1290	681	723	582	1350	537	1250	910	786	644	804	984	1033	622	925	1023	523	955	916	591	1222	916	868	559
FBgn0011715	Snr1	1671	976	658	639	2335	1477	1479	1582	1291	923	1100	1443	1302	1137	1033	1160	938	1582	886	777	1265	1134	975	716
FBgn0011722	Tig	1452	888	2098	2055	2935	672	1070	832	2971	3560	3250	2947	1714	2027	2983	2862	1424	3019	2856	2883	892	1256	3631	1797
FBgn0011723	byn	3	3	3	0	0	0	0	0	1	2	0	1	8	4	0	0	4	0	4	3	5	1	0	0
FBgn0011725	twin	3894	1678	1779	1524	4534	2159	3597	2067	2399	1711	2116	2455	2823	1522	2358	2492	1822	2829	2166	1414	3348	2327	1943	1325
FBgn0011726	tsr	4476	3085	3185	2973	5730	3419	4698	4774	2587	3339	4159	4509	3533	3022	4138	3859	2556	4036	3787	2392	4159	2993	4331	2490
FBgn0011737	Wee1	3158	1732	1704	1655	4073	1924	3073	2398	2091	1428	1728	1773	2890	1737	1903	2255	1426	2932	1828	1364	2857	2236	1553	977
FBgn0011739	wts	3430	1294	2264	1983	3724	956	3356	2073	2350	1549	2236	2001	2982	1499	2843	3019	1664	2788	2730	1905	2618	2093	1867	1210
FBgn0011740	alpha-Man-IIa	1556	814	1067	952	1747	799	1722	1169	1188	1072	868	963	1267	743	1215	1291	550	1315	942	738	1366	1104	998	627
FBgn0011741	Arp6	950	559	487	451	1235	929	981	1099	725	627	714	715	735	568	775	725	495	762	635	541	738	653	693	356
FBgn0011742	Arp2	2855	1037	1273	1233	3194	1396	2694	1724	1694	1017	1635	1567	2468	1200	1926	2036	1658	2299	1797	1109	2496	1710	1349	731
FBgn0011743	Arp53D	0	1	0	0	0	0	2	0	0	0	1	0	0	0	0	0	0	1	0	0	0	0	0	3
FBgn0011745	Arp1	4179	2850	2214	1930	4875	3243	4671	5042	2497	2418	3007	3631	3664	2713	3641	3910	2155	3639	3469	2645	3568	3117	3120	2269
FBgn0011746	ana	980	438	639	523	859	396	829	664	470	317	375	438	612	330	582	683	376	676	536	406	842	662	479	369
FBgn0011747	Ank	15946	7613	10553	9037	16349	7161	13950	9325	8815	7160	8436	9359	11650	5804	10604	11571	7133	12991	9807	4917	13743	8516	7901	4040
FBgn0011754	PhKgamma	8239	3690	3900	3350	8845	2950	7254	5880	4754	3389	5840	7472	6044	4352	5535	5858	4405	6650	5213	3820	6258	4356	4552	2860
FBgn0011758	B-H1	194	145	161	157	130	62	165	89	150	104	132	184	186	84	164	206	66	143	198	116	196	148	162	157
FBgn0011760	ctp	37122	15384	15735	12910	43778	13925	38029	22192	16599	15408	24575	24360	28772	13157	23430	25651	17928	26440	32891	15752	37781	19068	19821	12578
FBgn0011761	dhd	0	0	186	34	2	0	1	1	2	0	2	0	0	0	0	1	2	2	0	0	0	1	2	1
FBgn0011762	Prim1	151	85	79	87	141	69	67	88	50	49	70	102	102	53	88	104	71	71	86	62	89	56	72	36
FBgn0011763	Dp	3262	1600	1832	1748	3630	1909	3000	2216	1952	1343	1936	1778	2526	1400	2454	2404	1623	2414	2066	1383	3139	2176	2036	1299
FBgn0011766	E2f1	5527	1996	2344	2058	4762	1124	3954	2112	3151	1993	2961	3158	4209	2091	3211	3785	2084	4016	2911	1709	3382	2097	2103	1365
FBgn0011768	Fdh	1173	1063	2178	2550	1211	689	1608	1816	1114	1514	2744	2467	1601	1669	4208	3803	906	1913	2161	2312	1369	1368	4003	2056
FBgn0011769	Fdx1	459	392	206	211	617	472	365	514	294	239	324	381	302	370	250	276	271	425	295	246	415	412	301	224
FBgn0011770	Gip	565	420	1232	1217	541	369	1004	1339	300	386	1674	954	446	443	2098	1912	338	492	1093	1043	352	365	3235	1157
FBgn0011771	Hem	1491	760	964	784	1917	773	1532	1210	1044	741	981	1010	1244	757	1198	1327	690	1272	1006	617	1458	1035	1048	529
FBgn0011774	Irbp	354	195	177	155	591	343	303	250	324	234	209	274	352	384	275	318	276	481	248	184	305	272	256	168
FBgn0011785	BRWD3	3930	1681	1875	1536	4306	1458	2918	2012	2596	1864	1825	2070	3131	1698	2340	2711	1883	3399	2280	1997	2933	2853	1702	1099
FBgn0011787	mRpL12	1733	865	663	558	1782	1125	1547	1553	1065	764	1252	1511	1401	1078	1067	1185	957	1387	1287	928	1337	1215	1038	745
FBgn0011802	Gem3	314	149	153	143	326	183	262	202	149	109	203	240	288	186	225	264	192	377	186	163	190	129	117	55
FBgn0011817	nmo	16083	6256	4174	3601	17048	5112	11730	6463	10763	6903	10284	13671	9536	5130	5190	6215	6409	9236	7059	2938	10080	5373	3798	3291
FBgn0011818	oaf	4323	2475	2052	1785	1873	1122	1714	1202	1075	844	1141	1283	1459	661	1125	1378	787	1572	1334	611	1592	1059	935	666
FBgn0011822	Pgcl	0	0	0	0	0	0	2	0	0	2	1	0	1	0	1	0	0	0	1	0	0	0	2	0
FBgn0011824	CG4038	403	221	356	336	541	152	403	255	306	157	371	285	345	243	494	417	306	430	318	281	311	230	742	308
FBgn0011826	Pp2B-14D	6564	2603	3211	2713	6471	2523	5788	3316	3523	2455	3573	3584	4746	2129	3839	3912	2659	4234	3584	1983	5508	3404	3174	1843
FBgn0011828	Pxn	8042	4138	3827	3361	9244	4358	7037	6127	6525	5331	4460	5395	5924	4202	5057	5645	3281	6090	4414	3819	7554	6811	5886	3815
FBgn0011829	Ret	247	94	145	87	128	57	208	121	101	111	101	93	182	70	158	201	82	136	146	120	212	155	105	74
FBgn0011834	Ser6	0	0	0	5	0	0	0	0	0	7	1	0	0	0	0	0	0	0	0	0	0	0	1	0
FBgn0011836	Taf2	723	381	445	412	1021	353	575	522	519	354	355	415	573	456	525	545	435	827	456	367	530	453	330	180
FBgn0011837	Tis11	867	287	1173	1047	1658	646	1854	1063	1400	508	1346	1286	786	531	1171	1473	580	1133	943	618	803	587	1469	838
FBgn0011844	tRNA:Asp-GTC-1-10	0	0	0	0	0	0	0	0	0	0	0	1	0	1	0	0	0	1	0	0	0	0	0	0
FBgn0011845	tRNA:Asp-GTC-1-11	0	0	0	0	0	0	0	0	0	0	1	0	0	0	0	0	0	0	1	0	0	0	0	0
FBgn0011849	tRNA:Glu-TTC-1-5	0	0	0	0	0	0	0	0	0	0	0	0	0	0	0	0	0	0	0	0	0	0	0	0
FBgn0011850	tRNA:Glu-TTC-1-4	0	0	0	0	0	0	0	0	0	0	0	0	0	0	0	0	0	0	0	0	0	0	0	0
FBgn0011859	tRNA:Gly-GCC-1-1	0	0	0	0	2	0	0	0	1	0	0	0	0	0	0	0	0	0	0	0	0	0	0	0
FBgn0011861	tRNA:Gly-GCC-1-3	0	0	0	0	0	0	0	0	0	0	0	0	0	0	0	0	0	0	0	0	0	0	0	0
FBgn0011868	tRNA:Gly-GCC-1-9	0	0	0	0	0	0	0	0	0	0	0	0	0	0	0	0	0	0	0	1	0	0	0	0
FBgn0011870	tRNA:Gly-GCC-1-11	0	0	0	0	0	0	0	0	0	0	0	0	0	0	0	0	0	0	0	0	1	0	0	0
FBgn0011872	tRNA:Gly-GCC-1-13	0	1	0	0	0	0	0	0	0	1	0	0	1	0	0	0	7	0	7	1	1	0	1	0
FBgn0011878	tRNA:His-GTG-1-4	1	4	0	0	0	0	0	0	0	5	0	1	0	3	0	1	3	2	0	0	1	0	0	0
FBgn0011879	tRNA:Ala-TGC-2-1	0	0	0	0	0	0	0	0	0	0	0	0	0	0	0	0	0	0	0	0	0	0	1	0
FBgn0011880	tRNA:Ile-AAT-1-1	0	0	0	0	0	0	0	0	0	0	0	1	0	0	0	0	0	0	0	0	0	0	0	0
FBgn0011881	tRNA:Ile-AAT-1-3	0	0	0	0	0	0	0	0	0	0	1	0	0	0	0	0	0	0	0	0	0	0	0	0
FBgn0011884	tRNA:Ile-AAT-1-6	0	0	0	0	0	0	0	0	2	0	0	0	0	0	0	0	0	0	0	0	0	0	0	0
FBgn0011885	tRNA:Ile-AAT-1-7	0	0	0	0	0	0	0	0	0	0	0	0	1	0	0	0	0	0	0	0	0	0	0	0
FBgn0011887	tRNA:Lys-CTT-1-4	0	0	0	0	2	0	0	0	0	0	0	0	0	0	0	0	0	0	0	0	0	0	0	0
FBgn0011888	tRNA:Lys-CTT-1-3	2	0	0	0	1	0	0	0	0	0	4	0	2	0	1	0	0	0	0	0	0	2	0	0
FBgn0011889	tRNA:Lys-CTT-1-2	7	5	0	0	13	0	5	0	5	2	2	8	7	1	1	3	0	4	3	3	3	0	1	0
FBgn0011890	tRNA:Lys-CTT-1-5	2	2	1	0	4	0	3	0	0	0	0	0	0	0	1	0	0	0	0	0	0	0	4	0
FBgn0011891	tRNA:Lys-CTT-1-1	4	2	0	0	0	0	3	0	4	0	3	7	0	0	1	0	1	0	2	0	0	0	2	0
FBgn0011892	tRNA:Lys-CTT-1-6	0	0	0	0	0	0	0	0	0	0	0	0	0	0	2	0	0	0	0	0	0	1	0	0
FBgn0011893	tRNA:Lys-CTT-1-7	0	0	0	0	0	0	0	0	0	0	0	0	0	1	0	0	0	0	0	0	0	0	0	0
FBgn0011894	tRNA:Lys-CTT-1-8	0	0	1	0	0	0	0	0	0	0	0	0	0	0	0	0	0	0	1	0	0	0	0	0
FBgn0011895	tRNA:Lys-CTT-1-9	0	0	1	0	0	0	0	0	0	0	0	0	0	0	0	0	0	0	1	0	1	0	0	1
FBgn0011896	tRNA:Lys-CTT-1-10	0	0	0	0	0	0	0	0	0	0	0	3	0	0	0	0	0	0	0	0	0	0	1	0
FBgn0011897	tRNA:Lys-CTT-1-11	0	0	0	0	0	0	0	0	0	0	0	2	0	0	0	0	0	0	0	0	0	0	0	0
FBgn0011902	tRNA:Lys-TTT-1-1	0	0	0	0	0	0	0	0	0	0	0	0	0	0	0	0	14	4	5	2	0	0	0	0
FBgn0011909	tRNA:Leu-CAA-2-1	0	0	0	0	4	0	0	0	0	1	0	0	0	0	0	0	1	0	0	0	0	0	0	0
FBgn0011910	tRNA:Leu-CAA-1-1	0	0	0	0	0	0	2	0	0	1	0	0	0	0	0	0	0	1	0	0	1	0	0	0
FBgn0011916	tRNA:Met-CAT-1-2	3	0	0	1	0	0	0	0	0	0	0	0	2	0	0	0	0	0	0	0	0	0	0	0
FBgn0011921	tRNA:iMet-CAT-2-1	0	0	0	0	0	0	1	0	0	0	0	0	0	0	0	0	0	1	0	0	1	0	0	0
FBgn0011931	tRNA:Asn-GTT-1-6	0	0	0	0	0	0	1	1	0	0	0	0	0	0	0	0	0	0	0	0	0	0	1	0
FBgn0011932	tRNA:Asn-GTT-1-5	1	0	0	0	0	0	0	0	0	0	0	0	0	0	0	0	0	0	0	0	0	0	0	0
FBgn0011933	tRNA:Asn-GTT-1-4	1	0	0	0	0	0	0	0	0	0	0	0	0	1	0	1	0	0	0	0	0	0	0	0
FBgn0011936	tRNA:Asn-GTT-1-3	0	0	0	0	1	0	1	0	0	0	0	0	0	0	1	0	0	1	0	0	0	0	0	0
FBgn0011938	tRNA:Asn-GTT-1-1	0	0	0	0	1	0	0	0	0	0	0	0	0	0	0	0	0	0	0	0	0	0	0	0
FBgn0011954	tRNA:Arg-TCG-2-2	0	0	0	0	0	0	0	0	0	0	0	0	2	0	0	0	3	0	0	0	0	0	0	0
FBgn0011956	tRNA:Arg-ACG-1-3	0	0	0	0	0	0	0	0	0	0	0	0	0	0	0	0	0	0	1	0	0	0	0	0
FBgn0011957	tRNA:Arg-ACG-1-2	0	0	1	0	0	0	0	0	0	0	0	0	0	0	0	0	0	0	0	0	0	0	0	0
FBgn0011961	tRNA:Arg-ACG-1-8	0	0	0	0	0	0	0	0	0	0	0	0	0	0	0	0	0	0	0	0	1	0	0	0
FBgn0011981	tRNA:Ser-AGA-3-2	0	0	0	0	0	0	4	0	0	1	0	0	2	1	0	0	0	2	0	0	2	0	0	2
FBgn0011982	tRNA:Ser-AGA-2-1	0	0	1	0	0	0	0	0	2	1	2	0	0	0	2	0	0	0	0	0	0	0	0	0
FBgn0011985	tRNA:Ser-AGA-2-3	0	0	0	0	0	0	0	3	0	0	0	0	0	0	0	0	0	0	0	0	0	0	0	0
FBgn0011987	tRNA:SeC-TCA-1-1	2	3	0	1	0	0	0	0	0	0	1	0	0	0	0	0	0	4	3	0	0	0	1	1
FBgn0011993	tRNA:Thr-AGT-1-5	0	0	0	1	0	0	0	0	0	0	0	0	0	0	0	0	0	0	3	2	0	0	0	0
FBgn0012001	tRNA:Val-CAC-2-4	0	0	1	0	0	0	0	0	0	0	0	0	0	0	0	0	0	0	0	0	0	0	0	0
FBgn0012009	tRNA:Val-AAC-2-4	2	0	0	0	0	0	1	0	0	0	1	0	0	0	0	0	0	1	0	0	0	0	0	0
FBgn0012018	tRNA:Tyr-GTA-1-9	0	0	0	0	0	22	0	0	0	0	0	0	0	0	0	0	0	0	0	0	0	0	0	0
FBgn0012024	tRNA:Tyr-GTA-1-8	0	0	0	0	1	0	0	0	0	0	0	0	0	0	0	0	0	0	0	0	0	0	0	0
FBgn0012025	tRNA:Tyr-GTA-1-7	0	0	0	1	0	0	0	0	0	0	0	3	0	0	0	0	0	0	0	0	0	0	1	0
FBgn0012027	tRNA:Tyr-GTA-1-5	0	0	0	0	1	0	0	0	0	0	0	0	0	0	0	0	0	4	0	0	0	0	2	0
FBgn0012028	tRNA:Tyr-GTA-1-4	0	0	0	0	0	0	0	0	0	0	0	1	0	0	0	0	0	0	0	0	0	1	0	0
FBgn0012034	AcCoAS	16574	8078	20155	17751	16512	6887	20275	14862	7842	7025	14271	10167	12290	6781	27346	25623	6364	12255	15126	13042	15771	11538	26017	10084
FBgn0012036	Aldh	7785	5252	14737	15578	4554	3147	12490	12927	5782	8104	15939	15715	7103	6015	25573	24293	4018	8200	15072	16379	7903	6824	26132	11785
FBgn0012037	Ance	1200	603	1250	1020	516	386	656	511	1431	1046	1491	1455	722	452	1378	1346	404	897	988	845	587	575	1184	643
FBgn0012042	AttA	109	138	669	55	15	0	3	6	173	131	1614	106	797	1681	692	813	520	1928	597	2310	307	83	130	46
FBgn0012051	CalpA	3139	1542	2113	1867	3580	1732	3292	2342	1754	1593	1954	2139	2872	1653	3012	2954	1622	2976	2432	1470	2890	2075	2408	1283
FBgn0012058	Cdc27	2443	1048	1100	959	2883	1044	2128	1808	1715	1174	1551	1671	2001	1053	1814	1829	1244	1912	1674	1149	1917	1640	1252	983
FBgn0012344	Dh44	5768	2569	2546	2423	8845	3292	6324	3675	4523	2927	3248	3122	6040	3578	4106	4104	3563	6772	2533	1757	6295	4497	2860	1544
FBgn0013263	Trl	223	113	252	176	145	77	249	133	126	127	302	369	244	102	326	295	136	308	329	123	294	115	271	101
FBgn0013269	Fkbp39	1233	924	690	654	1848	942	1011	1129	728	727	767	989	1115	966	886	895	832	1285	767	639	1115	1034	1297	810
FBgn0013272	Gp150	6694	3532	11937	9798	6604	3644	8487	7107	5610	5349	11810	12309	7914	5225	16685	15630	5626	9543	13747	10443	9373	6688	19157	8932
FBgn0013275	Hsp70Aa	17	18	37	32	8	5	11	8	4	31	101	99	6	5	1	2	22	24	22	37	4	6	98	112
FBgn0013276	Hsp70Ab	40	19	203	207	49	2	39	27	36	58	435	271	20	16	20	14	55	144	131	93	30	19	452	388
FBgn0013277	Hsp70Ba	1	0	0	2	4	0	2	0	1	2	5	7	12	6	4	11	62	78	140	97	0	1	8	7
FBgn0013278	Hsp70Bb	18	30	16	6	13	0	13	2	28	51	270	116	31	52	36	53	28	56	101	71	4	21	186	134
FBgn0013279	Hsp70Bc	148	115	81	119	303	228	152	209	178	172	1359	875	180	185	176	154	111	147	152	174	78	163	685	802
FBgn0013300	ProtA	0	0	0	0	0	0	0	0	0	0	0	0	0	0	0	0	0	0	2	0	0	0	0	0
FBgn0013301	ProtB	3	0	0	0	6	0	1	0	2	2	0	0	2	0	0	0	4	0	0	0	0	0	3	0
FBgn0013303	Nca	4789	3839	2778	2515	5678	5744	6243	6860	2546	2982	4384	5328	4627	3226	3411	3985	3080	4779	3595	2126	5756	3185	3156	2127
FBgn0013305	Nmda1	7511	4723	8798	8045	6070	3134	8301	5877	4154	3680	5135	5967	7179	4817	8852	9690	3404	7871	7436	5112	9085	6328	8202	5352
FBgn0013307	Odc1	259	183	1923	1772	200	154	202	294	272	413	602	638	293	438	1223	1251	227	689	633	828	57	112	1531	818
FBgn0013308	Odc2	1	0	0	0	0	0	4	0	0	5	9	9	3	2	7	7	0	4	1	3	23	7	127	89
FBgn0013323	Ptth	90	74	72	36	127	91	71	35	59	35	36	88	62	86	40	38	58	110	28	19	51	42	45	20
FBgn0013325	RpL11	13993	11517	25133	25720	16196	14452	16260	20489	9758	11302	18365	19907	11492	15874	21931	23897	9178	19171	14934	18083	9536	10866	26601	16642
FBgn0013334	Sap47	169819	82963	52916	48542	188678	79938	151177	95495	90824	75138	104876	137689	113656	61240	70722	85592	78449	104787	87450	46211	127271	68008	55853	51651
FBgn0013342	nSyb	59900	25667	30255	25657	56205	25653	59424	42433	44480	29802	40463	45576	58385	31295	52914	59303	29595	49291	47422	25783	63161	38833	37206	22626
FBgn0013343	Syx1A	26799	8003	6068	5027	33390	7527	23740	12633	16435	8253	13795	13011	14284	6742	8113	10216	10170	12188	10798	5824	17358	9853	6507	6243
FBgn0013347	TfIIA-S	1644	1006	959	752	2045	1548	1735	2121	1199	1016	1505	1887	1646	1390	1403	1659	781	1747	1321	1119	1670	1207	1332	865
FBgn0013348	TpnC41C	461	626	1371	999	576	563	1192	882	372	366	1240	1732	805	472	735	1110	645	718	1793	1527	662	313	676	419
FBgn0013432	bcn92	1129	777	477	404	1509	1045	1029	1084	886	667	791	1076	1012	1030	751	895	777	1342	758	684	972	826	685	523
FBgn0013433	beat-Ia	1794	711	697	552	2555	989	1631	1222	1259	828	977	1096	1411	832	918	1057	945	1494	1021	570	1803	1093	780	566
FBgn0013435	Cdc2rk	527	360	243	242	507	346	532	379	368	259	391	340	436	245	399	398	219	369	343	227	447	349	324	180
FBgn0013467	igl	23871	14084	11446	9724	23996	10291	22502	16582	10530	11302	14632	19966	18843	9247	13597	15586	10806	19624	18501	8015	24665	12067	12719	6827
FBgn0013469	klu	387	195	336	213	752	199	468	433	280	218	464	440	355	291	691	711	270	391	296	166	238	175	323	136
FBgn0013531	MED20	237	130	137	101	297	154	276	198	187	153	136	186	221	146	173	184	117	209	165	126	259	189	178	111
FBgn0013548	l(2)dtl	536	279	210	165	757	338	359	299	352	295	283	246	409	366	268	319	236	557	203	205	414	332	231	161
FBgn0013563	Pex1	390	208	344	247	421	142	405	293	267	223	320	223	294	156	414	429	193	300	396	284	336	269	463	176
FBgn0013576	mtd	24592	9202	12575	10690	25206	8787	22631	13765	15547	10374	15205	16849	20384	8347	15384	16517	11416	18903	17391	8643	22275	13263	11674	6736
FBgn0013672	mt:ATPase6	3215	12295	25282	22623	2683	14595	26383	4855	990	7776	23508	23320	14391	8445	24189	24227	8852	15549	27539	9573	31345	12673	40295	14707
FBgn0013673	mt:ATPase8	0	1	0	1	0	0	0	0	0	0	3	0	0	2	0	0	0	1	2	0	0	4	0	3
FBgn0013674	mt:CoI	53021	57110	186769	146724	53190	49378	211341	56519	18139	45373	115005	94726	93335	35228	151427	143234	44981	89296	146722	53726	149888	51285	164104	40900
FBgn0013675	mt:CoII	3778	33781	60617	50760	5106	41839	80824	38250	5475	21489	59259	66837	32027	19808	59737	60601	21734	40703	54226	23949	49141	19972	64416	21070
FBgn0013676	mt:CoIII	22105	23998	79881	60067	24690	26659	87513	25107	6983	19790	61435	58120	31615	14634	70762	68647	18110	33596	65540	25965	52989	19771	82208	22983
FBgn0013678	mt:Cyt-b	6241	27407	77376	63911	5270	23309	84786	19725	2394	18378	58057	50558	42310	16710	75028	66448	27039	46852	85167	26757	59538	18019	80278	18934
FBgn0013679	mt:ND1	2974	3659	9892	8617	3023	3437	20861	5112	1154	2553	12909	9334	15363	3795	17664	13660	6327	9693	22286	4322	17739	3304	14848	2764
FBgn0013680	mt:ND2	34	237	247	228	190	156	1325	646	20	315	1184	688	2005	437	2118	1157	873	779	1873	356	1189	114	864	146
FBgn0013681	mt:ND3	21	662	1919	1555	43	374	2286	370	16	389	1588	1632	2146	1270	3235	3399	1380	2517	4964	2133	952	428	1279	577
FBgn0013683	mt:ND4L	13	26	79	56	2	28	23	20	1	17	14	38	28	15	15	25	16	28	19	15	22	11	30	3
FBgn0013684	mt:ND5	3152	4942	14540	13898	4101	4716	25636	5910	1465	3441	15183	7710	15763	3600	27557	15694	8094	8927	29029	5410	22784	3534	24596	2907
FBgn0013685	mt:ND6	4	153	150	140	24	148	638	239	2	148	484	272	626	146	620	265	254	225	442	94	328	41	385	34
FBgn0013686	mt:lrRNA	366680	2027039	1325446	1263316	466842	1855898	3865543	1494762	152282	1610206	3916539	4602173	2547627	1095630	1808403	1823719	1594221	2677906	1768545	658762	4367003	1064093	2175096	685061
FBgn0013688	mt:srRNA	1077	6376	4085	3937	533	2975	15225	5522	207	3254	13626	18322	6968	2515	8445	7263	4826	7364	6710	1614	17019	2233	15723	9869
FBgn0013690	mt:tRNA:Cys-GCA	1	1	1	0	0	0	1	0	0	1	0	0	0	0	0	0	0	4	0	0	0	0	2	0
FBgn0013693	mt:tRNA:Phe-GAA	0	0	0	0	1	0	0	0	0	0	0	0	0	0	0	0	0	0	0	0	0	0	0	0
FBgn0013696	mt:tRNA:Ile-GAT	0	0	0	1	0	13	1	0	0	2	0	0	0	0	1	0	0	5	0	0	1	1	1	0
FBgn0013702	mt:tRNA:Pro-TGG	0	0	0	1	0	0	1	0	0	3	2	0	0	0	0	2	0	0	3	0	1	0	0	0
FBgn0013703	mt:tRNA:Gln-TTG	0	2	0	0	9	6	3	5	2	3	4	12	3	3	1	5	1	4	6	4	1	1	0	0
FBgn0013704	mt:tRNA:Arg-TCG	0	0	0	0	0	0	0	0	0	0	0	0	0	1	0	0	0	0	0	0	0	0	0	0
FBgn0013706	mt:tRNA:Ser-TGA	2	2	0	0	2	0	0	4	0	1	0	0	0	0	0	0	1	0	0	0	0	0	1	0
FBgn0013707	mt:tRNA:Thr-TGT	2	0	0	3	4	0	9	0	0	1	3	0	8	2	4	3	0	4	2	0	4	0	2	1
FBgn0013709	mt:tRNA:Trp-TCA	0	0	0	1	0	0	1	0	0	2	4	0	0	0	0	0	0	0	3	0	0	0	0	0
FBgn0013710	mt:tRNA:Tyr-GTA	6	2	6	5	0	0	7	2	0	4	4	5	7	4	16	7	5	3	4	0	9	0	2	0
FBgn0013717	not	1119	478	467	385	973	501	856	699	567	467	590	621	830	469	650	708	486	885	670	500	856	687	558	418
FBgn0013718	nuf	3396	2380	4494	3888	3937	2317	6328	4146	2003	2365	4037	4015	4451	2376	5478	6103	2625	4860	5004	3288	5388	3250	5208	2851
FBgn0013720	pck	633	296	507	455	602	270	586	495	539	386	599	710	530	427	657	589	322	741	690	567	695	502	622	334
FBgn0013725	phyl	4165	2177	1035	870	4771	1874	2675	2586	2471	1793	2141	3090	2862	1948	1747	2021	1664	3083	1727	1233	3054	2366	1557	1232
FBgn0013726	pnut	6692	3533	2267	2155	8166	4176	5676	4422	4421	3098	3569	4031	5642	3834	3575	4041	3933	5687	3748	2855	5745	4659	3216	2119
FBgn0013732	sced	1260	588	501	429	1456	454	1047	800	716	515	534	715	847	446	587	702	453	981	678	449	958	777	451	281
FBgn0013733	shot	23140	9268	17701	14978	27501	10221	22971	13305	16766	11739	16856	18705	23829	12780	19331	22275	14528	27608	19091	15121	17333	15115	13658	9582
FBgn0013746	alien	2084	1223	1289	1241	2544	1403	2243	1916	1321	1169	1290	1583	1681	1204	1515	1911	896	1785	1133	827	2380	1804	1843	974
FBgn0013749	Arf4	1635	1680	1684	1547	1767	1868	2429	2242	847	1204	1818	2362	1719	1339	1781	1908	1165	2027	1606	1014	2161	1340	1871	1113
FBgn0013750	Arf6	3982	2265	2158	2019	4314	2178	4188	3003	2249	1958	3129	3937	3428	2192	3196	3232	2364	3662	3087	1736	4459	2313	2790	1548
FBgn0013751	Awh	401	188	142	150	305	73	293	163	196	186	191	210	255	134	174	151	152	236	202	115	269	207	161	90
FBgn0013753	Bgb	3237	2300	1302	1252	3964	3008	3307	3650	1559	1570	2114	2659	2784	2148	1911	2015	2073	2780	2016	1585	2867	2135	1648	1291
FBgn0013755	Bro	0	0	0	0	0	0	0	0	0	0	0	0	0	0	0	0	0	1	0	3	0	0	0	0
FBgn0013756	Mtor	3192	1322	1731	1510	3576	1114	2382	1678	2237	1641	1538	1823	2946	1706	2143	2280	1580	2989	1853	1444	2486	2390	1670	982
FBgn0013759	CASK	23227	6800	7248	6405	25575	7851	19419	10418	16698	8973	11951	11128	16836	7442	10026	11721	10221	15068	11432	7295	17034	14152	7755	6400
FBgn0013762	Cdk5	976	573	756	596	1306	665	1086	1111	663	486	861	750	992	696	998	1009	473	911	965	698	1040	813	819	497
FBgn0013763	Idgf6	3218	2099	11963	11520	4110	2540	5538	6397	24521	24993	8001	6088	3767	4861	18034	16564	2386	6363	6243	8230	3910	4010	26895	11533
FBgn0013764	Chi	2750	1575	1325	1112	4007	1527	2639	2856	2060	1760	2057	2343	2443	2039	1895	2241	1584	2830	1729	1714	2583	2437	1883	1258
FBgn0013765	cnn	3478	1699	2278	2138	3780	1567	3239	2155	2242	1615	2121	2221	2830	1517	2756	2891	1928	3541	2999	2213	2661	2317	2123	1325
FBgn0013767	Crz	2208	1789	619	673	4184	2021	1511	1950	1627	1459	1490	1988	1684	1756	892	1195	616	980	441	439	1481	1765	986	828
FBgn0013770	Cp1	11785	7386	14696	10960	9532	6105	11324	10649	10325	12147	13816	12571	10407	9584	18141	19538	6686	12031	16409	12595	9839	9212	21344	11714
FBgn0013771	Cyp6a9	789	530	937	718	756	421	789	579	817	601	1111	1090	824	500	1757	1662	579	1153	1412	1113	935	597	1788	751
FBgn0013772	Cyp6a8	58	21	75	75	52	8	78	112	669	758	1073	669	822	651	6765	6718	262	861	652	512	564	431	2914	1061
FBgn0013773	Cyp6a22	160	84	361	292	72	41	159	193	173	243	304	157	218	213	734	737	189	432	344	339	191	173	963	321
FBgn0013799	Deaf1	5434	2267	1834	1653	7463	2313	4890	3335	3766	2275	3007	3345	3798	2243	2529	2865	2243	3832	2683	1937	3880	2829	2079	1441
FBgn0013810	Dhc36C	104	41	46	53	97	77	51	13	77	61	44	82	55	14	34	35	28	46	27	32	84	53	23	24
FBgn0013811	Dhc62B	44	38	43	49	78	36	40	12	33	51	42	62	37	38	54	42	13	67	10	26	22	29	58	29
FBgn0013812	Dhc93AB	85	60	106	73	117	45	146	84	62	53	57	98	118	49	81	113	87	102	100	64	79	97	72	55
FBgn0013813	Dhc98D	25	19	33	13	44	0	48	73	74	67	56	49	39	27	42	30	17	43	35	25	24	24	24	17
FBgn0013949	Elal	617	469	2090	2062	821	643	1048	1077	1527	2222	1103	1046	403	571	2230	2621	439	1094	1184	1359	332	366	3057	1399
FBgn0013953	Esp	160	60	242	153	79	96	114	43	113	78	145	130	121	93	152	127	66	111	127	98	117	76	151	92
FBgn0013954	Fkbp12	5742	4260	3728	3540	6030	3546	5317	6682	3705	3841	6435	8251	5660	5337	6089	6692	3814	7445	5167	5136	4164	3922	5554	3681
FBgn0013972	Gycalpha99B	16820	9106	5673	5260	22023	12036	16564	15282	9764	8407	9763	11913	10300	7262	7446	8578	6864	10617	8245	7001	12084	10875	6825	5601
FBgn0013973	Gycbeta100B	7357	3099	2686	2344	8239	3600	5758	3844	4471	3041	3285	3718	5553	2856	3366	3828	3032	5681	3594	2277	6061	4738	2600	1873
FBgn0013981	His4r	10343	11415	10608	10244	12104	20153	16844	19129	5802	8508	13273	15669	13886	13095	12413	12452	10295	13852	8723	7866	15399	11120	13101	8476
FBgn0013983	imd	616	422	426	460	809	409	556	693	440	421	496	401	567	488	810	819	300	681	514	478	502	451	833	498
FBgn0013987	MAPk-Ak2	2803	1519	2106	1972	3315	1358	2949	2486	1833	1376	2244	2009	2468	1683	2887	2912	1415	2675	2709	2001	2694	1974	2917	1580
FBgn0013995	Calx	9536	4366	7452	6376	8344	4642	12357	7057	6826	5569	7331	7257	10439	4368	9996	11208	4716	9132	10270	6728	8877	5836	6133	3564
FBgn0013997	Nrx-IV	2176	995	1848	1495	2716	1045	2449	1468	1698	1164	1782	1733	2320	1113	2262	2473	1201	2350	2524	1468	2632	1790	1915	1012
FBgn0014000	Hf	327	296	1399	1475	202	232	702	1050	187	532	1115	978	346	513	2351	2290	284	651	786	851	198	212	2637	1140
FBgn0014006	Ask1	2066	928	1546	1340	2244	937	1839	1279	1300	1119	1303	1331	1629	991	1894	1856	1006	1905	1599	1204	1714	1391	1366	778
FBgn0014007	Ptp69D	1703	743	944	873	2297	898	1416	1014	1093	809	836	896	1336	708	1025	1123	720	1473	934	516	1654	1092	893	469
FBgn0014009	Rab2	7148	4259	4870	4037	7378	3964	7203	6134	3881	3231	5302	5533	6185	3874	5912	6282	3375	6035	5596	4018	7862	5275	5840	3570
FBgn0014010	Rab5	18627	10032	12405	10744	15965	8205	20585	16524	9186	8115	12701	14657	19555	10121	16475	18032	8266	16630	12552	8584	21308	12759	13517	8676
FBgn0014011	Rac2	941	358	716	667	669	364	917	386	646	463	1050	900	579	367	889	888	449	677	1016	499	824	470	1081	611
FBgn0014018	Rel	2630	1450	2556	1430	4846	1910	2127	2091	2871	2194	2985	2387	2779	2664	3345	3204	2783	5559	3399	3146	2266	2067	4509	2160
FBgn0014019	Rh5	4187	2326	10763	10847	795	807	6377	5574	1631	1787	6788	5412	4091	3183	9284	9306	2385	3176	9530	8466	4006	2443	12952	8696
FBgn0014020	Rho1	8108	4356	6138	4854	9341	3265	8515	6519	5261	4380	7559	8593	7617	4572	9222	8761	4904	8501	7877	4594	8604	5077	8622	4090
FBgn0014022	Rlb1	857	476	387	356	896	361	596	543	527	384	430	493	598	399	398	516	354	603	435	295	592	451	456	330
FBgn0014023	mRpL47	1104	909	686	618	1592	1012	1413	1739	778	834	1081	1331	1102	1044	943	970	772	1245	923	715	1190	981	980	675
FBgn0014024	Rnp4F	2503	1199	1113	951	3664	1923	2490	2068	1883	1167	1343	1535	2027	1239	1365	1446	1360	2049	1323	1005	2869	2265	1813	1270
FBgn0014026	RpL7A	44292	35421	50066	54014	62502	61367	61206	75311	38182	37372	51739	60370	42575	53685	63556	71297	36556	65525	46976	53364	43012	48139	73662	48738
FBgn0014028	SdhB	11553	7445	7353	6634	13432	8598	13432	14471	7716	6052	9226	10297	9059	7608	9939	11572	6084	9712	10767	11211	9564	10088	10632	7991
FBgn0014029	Septin2	3325	2366	1448	1307	4539	2727	3496	3750	2285	1817	2219	2553	2952	2348	2335	2577	1857	3562	2185	1997	3110	2840	2143	1575
FBgn0014031	Agxt	721	435	3546	3043	911	518	859	1433	434	864	3913	1927	702	1142	5187	4073	541	1111	1919	2525	329	367	5569	1894
FBgn0014032	Sptr	598	371	490	478	758	402	725	584	415	443	618	862	629	427	854	795	432	603	589	494	719	587	632	380
FBgn0014033	Sr-CI	139	63	204	140	198	141	492	208	2308	1278	424	378	820	801	1089	1177	197	626	418	579	473	428	1163	570
FBgn0014037	Su(Tpl)	15393	6687	6397	5670	19577	6373	12408	8113	10261	7584	10357	13593	11526	7014	8072	9158	8959	13674	8811	5522	11567	7740	6999	5136
FBgn0014073	Tie	1068	440	762	659	789	270	899	558	630	436	796	710	792	421	989	1003	550	888	963	757	638	533	900	480
FBgn0014075	Uggt	1576	890	2146	2031	1569	1052	2449	1892	1633	1343	1411	1504	1647	1112	2369	2481	880	1547	1747	1445	1920	1514	2241	1182
FBgn0014076	Vm32E	13	9	1	0	1	16	2	3	0	1	0	0	0	6	1	3	0	0	0	0	4	0	1	0
FBgn0014092	CG4278	476	296	282	250	604	206	475	458	297	166	245	248	355	270	312	328	227	327	330	162	464	291	309	206
FBgn0014127	barr	331	173	192	142	476	345	301	186	202	174	151	139	243	157	217	259	221	352	178	194	208	200	201	75
FBgn0014133	bif	12083	4684	7525	6315	10919	3947	11992	8028	8737	5933	7625	7202	8679	3947	9003	10138	5010	7410	9319	6672	10326	7799	7221	4580
FBgn0014135	bnl	963	540	293	255	478	113	445	286	729	678	697	887	771	531	589	558	1091	1426	989	612	5415	1871	1845	1662
FBgn0014141	cher	2633	1264	3123	2629	2441	1114	2492	1668	1668	1282	3197	2830	2358	1481	3145	3273	1466	2533	3186	3132	1651	1837	2305	1420
FBgn0014143	croc	208	81	80	72	275	51	190	128	137	90	107	159	161	98	116	113	102	166	115	74	200	137	65	49
FBgn0014163	fax	29655	15701	10392	9137	41578	13851	23811	18174	18490	11300	22109	26998	23418	15937	14228	16126	17182	23013	19664	9765	29002	16932	14414	12941
FBgn0014179	gcm	51	21	14	10	75	56	37	26	35	19	13	28	28	18	17	20	8	23	9	15	33	29	16	11
FBgn0014184	Oda	38078	25671	41565	36986	31576	21687	56840	41813	18049	18805	37990	41474	39408	24293	48881	52192	22449	38217	34539	23068	49845	28567	46179	25025
FBgn0014189	Hel25E	3616	2147	2087	1947	4838	2813	3371	3381	2282	1734	1899	2144	2818	2294	2498	2582	1747	3426	1723	1544	2863	2665	2284	1657
FBgn0014269	prod	1482	878	683	662	1653	932	1348	1329	972	758	1010	1219	1236	1008	933	1189	737	1312	909	743	1315	1067	880	705
FBgn0014340	mof	538	237	254	198	752	228	436	388	455	244	235	241	435	320	390	389	205	434	314	251	483	416	305	203
FBgn0014342	mia	151	99	100	88	251	61	304	203	113	124	132	172	139	102	122	182	91	227	97	62	134	114	186	90
FBgn0014343	mirr	885	339	298	276	1238	364	885	525	633	426	634	621	630	294	485	505	424	698	591	361	717	579	406	333
FBgn0014366	noi	1027	554	547	545	1363	596	913	931	708	604	581	675	798	619	775	901	468	900	625	502	1009	728	719	381
FBgn0014368	nol	56	28	24	18	35	0	17	22	15	34	17	19	32	15	14	16	19	21	26	9	35	17	26	12
FBgn0014380	RhoL	462	279	345	298	461	325	431	545	381	329	524	670	461	381	489	552	369	580	548	375	440	419	519	333
FBgn0014388	sty	8878	4725	3143	2725	9843	4016	5824	3806	4582	3234	4938	6092	6449	3782	3468	3837	4259	6084	3352	1754	5929	2923	3513	2579
FBgn0014391	sun	4256	3883	4884	3970	4266	4781	7254	7518	2909	2574	7375	10017	4315	3509	5109	5681	2835	4106	6449	5502	4662	2989	5456	3994
FBgn0014395	tilB	13	16	16	15	128	44	79	67	30	19	24	47	21	7	13	11	9	21	7	6	17	8	11	9
FBgn0014396	tim	2735	1136	4239	4281	3223	1159	1396	996	3823	2888	2188	1784	4711	3356	2690	3255	3308	6913	4178	3090	2316	1509	1634	1289
FBgn0014411	Vps26	3221	1596	1689	1504	3037	1535	2724	2108	1787	1353	1938	2055	2388	1338	2313	2459	1452	2384	2148	1576	2557	1948	1898	1116
FBgn0014417	CG13397	239	126	407	303	202	131	407	260	764	750	465	459	388	246	864	891	205	396	605	483	283	219	637	300
FBgn0014427	CG11899	1771	1274	3759	2741	1982	1519	1020	1416	1468	1878	2321	1543	961	1625	3155	3592	1191	2280	1989	1884	730	627	4289	1445
FBgn0014454	Acp1	2018	894	226	6	308	287	1932	37	635	1039	3607	1830	208	244	92	112	1920	337	15387	5867	671	1718	122	56
FBgn0014455	Ahcy	2616	1273	4792	3076	3008	1481	1914	2562	1730	2513	2692	2331	1330	1978	3285	4320	1325	2596	1461	1378	1004	1227	4295	1796
FBgn0014464	Cp7Fa	97	61	51	45	163	60	58	55	110	135	67	121	70	65	47	47	59	103	33	41	44	67	38	15
FBgn0014465	Cp7Fb	149	62	46	41	168	159	48	54	74	81	54	79	18	21	17	8	15	29	13	4	59	70	35	21
FBgn0014466	Cp7Fc	61	17	13	11	16	0	7	4	9	22	6	20	6	6	0	0	9	15	2	1	8	10	2	0
FBgn0014469	Cyp4e2	687	376	1538	1258	446	241	1149	1138	4218	5048	2502	2512	1586	1297	8290	7897	742	1645	2258	2011	654	541	4999	1684
FBgn0014848	Eig71Eh	0	0	0	0	0	0	0	0	0	0	0	0	0	0	4	0	0	2	1	0	0	0	0	0
FBgn0014849	Eig71Ei	0	0	0	0	0	0	0	0	0	0	0	0	1	0	2	1	0	0	0	0	0	0	0	0
FBgn0014850	Eig71Ej	0	0	0	0	0	0	0	0	0	0	0	0	0	0	1	1	0	0	1	0	0	0	0	0
FBgn0014851	Eig71Ek	1	0	0	1	0	0	0	0	0	4	0	0	57	51	51	57	96	87	102	29	0	0	0	0
FBgn0014857	His3.3A	8872	5326	4248	3750	6024	3328	5977	7224	3572	2826	4423	4676	5948	4552	5168	5308	3016	5522	4097	3748	4481	3871	3869	2539
FBgn0014859	Hr38	900	375	657	670	608	239	503	248	599	570	1424	1021	729	340	671	714	532	852	636	325	673	440	1280	968
FBgn0014861	Mcm2	31	14	39	43	35	7	19	23	43	22	27	33	28	15	47	53	35	49	43	50	22	14	47	35
FBgn0014863	Mlp84B	5321	2862	10618	10002	3288	2092	7190	4876	2346	2292	10200	12225	4350	2264	5972	7067	3594	4324	11758	10363	5750	4483	9523	5978
FBgn0014865	Mtk	101	279	508	118	37	0	134	10	88	99	1322	73	137	217	116	183	62	484	441	1781	83	70	333	177
FBgn0014868	Ost48	1520	950	1245	1279	1670	1082	1779	1619	2058	2120	1415	1565	1646	1328	1872	2020	862	1773	1352	1299	1563	1515	2127	1350
FBgn0014869	Pglym78	13652	8082	7640	6583	15182	7562	14547	15374	7842	6932	12811	15798	10210	7575	10974	12692	7089	12425	16056	13993	11269	9445	11303	7622
FBgn0014870	Psi	6635	2250	2997	2708	5188	1416	4897	2140	3014	1847	2567	2350	3921	1485	2828	2882	2182	4037	3044	1732	4526	3092	2148	1364
FBgn0014877	Roe1	1548	733	625	589	1714	744	1361	1374	798	729	1001	1270	1432	948	1315	1269	878	1348	1198	805	1254	1032	980	572
FBgn0014879	Set	1209	776	667	663	1602	737	1247	1326	936	654	761	1093	1203	953	867	986	762	1264	782	685	1141	1125	854	571
FBgn0014906	Hydr2	2660	1355	1803	1454	2555	1056	2538	1756	1671	1239	1525	1293	2399	1536	2369	2356	1218	2362	1868	1402	2208	1601	1714	998
FBgn0014930	CG2846	962	673	966	854	898	596	1349	1460	587	719	1527	1926	1110	761	1364	1448	664	1116	1632	1174	1119	824	1300	758
FBgn0014931	CG2678	31	34	79	70	36	0	33	64	13	10	23	28	45	18	89	93	31	52	56	38	34	12	77	23
FBgn0014949	btn	0	0	0	0	0	0	0	0	0	0	0	0	0	0	0	1	0	0	2	1	0	0	0	0
FBgn0015000	betaggt-I	759	364	428	347	1033	479	754	602	655	404	544	550	698	492	609	639	393	730	617	538	732	549	556	343
FBgn0015001	iotaTry	7	0	2	2	0	0	1	0	0	3	0	1	4	4	1	4	0	1	3	0	0	0	4	0
FBgn0015008	Actn3	0	0	0	0	0	0	1	0	0	0	1	0	0	0	0	0	0	0	0	0	0	0	0	0
FBgn0015010	Ag5r	78	32	18	16	111	83	58	35	114	115	140	204	42	10	17	19	10	33	12	7	116	23	1126	19
FBgn0015011	AhcyL2	443	222	419	349	249	266	380	418	279	352	428	391	319	258	591	621	234	384	650	538	396	344	821	481
FBgn0015019	CCT3	2421	1337	1296	1324	3523	1451	1930	1748	1937	1448	1667	1628	1856	1806	1723	1753	1224	2529	1520	1253	2038	2067	2037	1494
FBgn0015024	CkIalpha	24950	17796	13798	12577	28148	17880	25084	23276	16161	15366	24354	38147	23388	16559	18978	20193	16921	24643	21174	12377	28669	15429	17766	13335
FBgn0015025	CkIIalpha-i1	253	138	105	104	263	61	239	188	115	128	133	169	201	120	164	170	116	153	196	126	204	146	131	87
FBgn0015031	cype	5599	3812	4655	3711	5122	4903	7871	6068	3757	3192	7206	8598	4912	4477	5371	6064	2984	4616	5839	5622	4597	4333	4867	3432
FBgn0015032	Cyp4c3	242	94	181	136	232	312	427	356	131	153	302	204	384	196	721	764	238	258	1128	751	246	198	235	124
FBgn0015033	Cyp4d8	76	27	159	140	110	119	125	138	430	428	232	183	213	225	730	701	108	322	420	342	123	128	304	137
FBgn0015034	Cyp4e1	118	41	158	141	105	90	122	59	654	729	247	303	112	66	206	184	72	136	238	179	114	118	258	137
FBgn0015035	Cyp4e3	433	586	439	377	98	14	146	87	422	515	242	97	163	234	1318	779	899	781	2849	1445	130	598	1034	434
FBgn0015036	Cyp4ae1	288	124	212	155	200	225	495	498	134	131	366	255	147	77	282	286	106	179	266	218	268	179	281	205
FBgn0015037	Cyp4p1	2328	1549	3655	2823	1031	583	695	742	2715	2209	2778	2757	777	863	1972	1751	1755	3089	2984	2389	1722	1650	4100	2384
FBgn0015038	Cyp9b1	3	1	6	7	145	101	362	369	57	77	50	56	80	86	213	203	96	231	262	267	53	29	276	119
FBgn0015039	Cyp9b2	291	255	1183	1168	42	90	73	69	5358	5732	2425	2409	904	838	5470	5004	563	1562	2042	2631	689	612	3012	1460
FBgn0015040	Cyp9c1	628	362	768	824	701	311	647	601	601	639	258	292	324	368	483	434	315	567	276	273	448	365	511	284
FBgn0015075	Ddx1	921	554	454	430	1027	566	750	695	638	433	467	647	741	536	720	681	522	759	552	481	653	701	614	331
FBgn0015218	eIF4E1	9394	5094	5589	4763	10148	4085	8771	8397	5685	4281	7213	8680	7765	5464	7577	8480	4638	8856	7689	5569	8410	6467	7045	4324
FBgn0015221	Fer2LCH	22681	13361	19920	17032	22700	11070	20477	18735	12831	11325	19298	21401	17083	11642	19079	21485	9953	20055	16099	13574	17901	14519	21476	12813
FBgn0015222	Fer1HCH	21294	13423	15327	12290	22993	12191	21599	21427	13952	14037	22438	24370	20014	16461	23184	26160	12046	23521	17479	15868	18798	16009	23139	14289
FBgn0015229	glec	2971	1270	1372	1131	2851	1174	2342	1643	2002	1260	1806	2239	2408	1111	1998	1996	1226	2310	2087	960	2867	1590	1744	1122
FBgn0015230	Glut3	1	0	0	0	0	0	0	0	0	0	0	0	0	0	0	0	0	0	0	0	0	0	0	0
FBgn0015239	Hr78	2131	1138	1445	1388	3155	1547	2647	2294	1289	1266	1715	1900	2028	1278	2266	2157	1304	2254	1965	1424	1943	1607	1761	1056
FBgn0015240	Hr96	1685	734	909	766	2046	710	1579	1421	1049	746	980	969	1324	835	1101	1187	783	1255	1028	875	1399	1223	966	630
FBgn0015245	Hsp60A	23592	15618	11620	11102	28317	17021	25014	23216	13858	12141	14886	16840	20683	16523	17835	20012	12809	21908	16136	15612	19753	18984	15673	11612
FBgn0015247	Diap2	6663	3794	3259	2897	7246	4386	5867	5706	3793	3395	4270	5221	5443	3672	4076	4715	2753	5574	3949	3317	5379	4437	3799	2550
FBgn0015268	Nap1	8591	5739	7607	6606	10016	6189	6957	8887	6077	4988	7030	8295	6631	6324	7766	8860	4321	8142	6082	5810	7164	6178	9353	5896
FBgn0015269	Nf1	4636	1808	2998	2190	4998	1920	4708	2414	2987	1901	2929	3158	4094	1493	3102	3396	2223	3861	3284	1818	4512	2973	2222	1332
FBgn0015270	Orc2	15	5	10	10	27	0	9	1	12	7	14	8	10	9	19	9	6	13	32	9	7	0	11	6
FBgn0015271	Orc5	124	66	54	59	103	70	68	67	58	36	65	80	12	13	26	21	18	27	30	17	61	55	56	27
FBgn0015277	Pi3K59F	2591	1254	1554	1371	2790	1865	2122	2066	1597	1332	1448	1409	1847	1435	1745	1972	1146	1812	1430	1361	1843	1550	1648	1008
FBgn0015278	Pi3K68D	1663	826	1556	1314	1622	440	1781	1026	1041	1007	1174	999	1672	867	1817	1841	885	1818	1566	911	1800	1279	1348	738
FBgn0015279	Pi3K92E	1978	803	1347	1047	1943	773	1634	931	1036	928	1202	1134	1423	709	1302	1531	821	1509	1418	917	1654	1292	1273	702
FBgn0015282	Rpt2	6315	3132	1956	1719	3304	2515	3390	3300	2027	4938	2250	2376	2296	2038	3027	3323	1723	2689	3766	2237	2568	3015	3009	1753
FBgn0015283	Rpn10	6051	3379	1892	1725	4170	3323	3797	3845	2364	4114	2463	2918	2778	2337	2863	3033	2064	3024	4064	2100	2958	3136	2954	1809
FBgn0015286	Rala	2292	1263	1370	1222	2426	968	2194	1407	1192	1039	1812	1921	1925	862	1802	1862	1127	1776	1795	888	2591	1233	1806	957
FBgn0015288	RpL22	17157	13059	21443	23767	20720	19390	18097	23353	17519	14204	16148	15370	15115	16901	23547	24962	13152	22935	15824	21167	11506	16488	28570	20836
FBgn0015295	Shark	423	205	335	281	367	105	340	261	255	204	375	329	339	296	420	430	180	356	336	337	248	204	319	200
FBgn0015296	Shc	1092	636	543	468	1438	608	965	882	703	649	729	964	934	739	778	841	566	1086	781	581	983	861	774	460
FBgn0015298	Srp19	614	513	373	377	1011	669	820	774	496	431	535	705	649	578	593	592	528	674	475	402	679	563	589	425
FBgn0015299	Ssb-c31a	952	1274	712	711	1307	2153	1134	1650	333	597	499	788	648	805	464	598	409	890	387	320	691	580	546	387
FBgn0015300	Ssl	3	3	0	4	0	0	2	0	0	3	3	0	1	4	0	0	0	5	0	1	4	0	2	5
FBgn0015316	Try29F	177	131	98	95	129	116	127	166	114	136	138	208	110	150	69	115	120	177	85	74	193	183	80	65
FBgn0015320	Ubc2	1965	1115	1160	1023	2355	1037	2123	1335	1229	1077	1447	1625	2127	1342	1774	1907	1217	2080	1663	1052	1977	1151	1287	756
FBgn0015321	Ubc4	2468	1468	1665	1420	3207	1768	2656	2289	1716	1278	1997	2233	2211	1522	2200	2242	1458	2441	2268	1684	2476	1965	2101	1271
FBgn0015331	abs	642	285	360	360	775	264	621	413	468	314	360	275	540	312	574	501	332	567	414	303	543	495	393	225
FBgn0015336	CG15865	1	0	9	4	6	11	8	0	0	1	8	5	6	25	39	39	4	12	4	2	4	7	37	17
FBgn0015338	CG5861	897	714	928	826	968	933	1625	1486	510	643	1115	1164	1005	673	1208	1333	512	1025	1031	706	1391	1015	1226	733
FBgn0015351	Mettl4	256	196	163	155	329	200	169	175	263	152	171	223	207	236	194	207	167	387	145	139	187	163	165	174
FBgn0015359	CG2034	574	388	308	284	751	265	461	471	404	341	439	434	498	385	488	500	306	529	419	349	414	343	465	246
FBgn0015360	oxt	1594	755	902	850	1658	952	1562	1104	1530	1289	1057	1132	1266	744	1280	1326	746	1334	1285	913	1290	1053	1039	605
FBgn0015371	chn	25165	10665	8562	7937	26183	9033	16846	12105	16873	10541	12966	15468	17940	9619	10040	11675	11803	18554	11160	6903	20512	15054	8463	6790
FBgn0015372	RabX1	906	387	482	418	1115	325	941	856	655	520	759	862	778	537	719	738	482	761	800	654	892	740	840	487
FBgn0015376	cutlet	69	28	57	73	92	60	53	31	19	25	33	31	41	31	66	72	41	73	73	64	44	29	64	43
FBgn0015379	dod	1233	840	534	476	1293	625	1047	991	805	689	820	1078	1090	927	818	827	658	1161	753	589	1070	886	715	491
FBgn0015380	drl	2810	1151	1007	820	3255	1206	1999	1405	1848	1324	1579	2054	1817	905	1266	1378	972	1749	1195	817	2232	1654	1115	752
FBgn0015381	dsf	114	47	41	29	1190	801	1126	758	48	35	43	45	112	38	63	55	44	105	44	38	57	77	41	33
FBgn0015391	glu	771	300	305	266	775	558	561	386	563	463	438	481	620	325	407	432	479	639	409	265	716	501	315	237
FBgn0015396	jumu	457	215	189	197	613	204	393	259	269	139	211	189	349	169	198	279	210	396	213	135	455	328	168	146
FBgn0015399	kek1	16646	5759	3642	3277	21297	5756	12810	8221	11610	6394	9407	11263	10271	5445	5452	6383	6753	9525	5793	3221	10201	6258	4158	3682
FBgn0015400	kek2	4526	1521	1790	1536	4221	1362	3173	1649	2384	1687	2104	2286	3074	1381	2091	2297	1634	3179	2313	1233	3661	2282	1671	1101
FBgn0015402	ksr	2520	1082	1152	1094	2855	1195	2127	1577	1788	1419	1374	1333	1944	1158	1573	1771	1219	2217	1354	1109	2012	1833	1172	666
FBgn0015477	Rme-8	2760	1195	1701	1479	2949	1101	2221	1452	1906	1391	1373	1507	1970	1144	1666	1833	1136	2184	1563	1073	2081	1736	1562	801
FBgn0015509	Cul1	9204	4242	5350	4765	9534	4523	8669	6532	5081	4219	5298	6091	6413	3813	6276	6977	3679	6782	6291	4317	6916	5357	5059	2917
FBgn0015513	mbc	1721	813	2056	1777	1670	781	1817	917	1253	1035	1487	1606	1747	1028	1985	2075	1215	2310	2038	1408	1625	1293	1736	979
FBgn0015519	nAChRalpha3	11147	4661	2191	2049	16323	4910	8779	5946	6621	4316	6598	9673	6809	3515	2989	3535	4838	6908	3828	1760	7241	3759	2539	2382
FBgn0015520	nonA-l	1629	664	767	620	1669	667	1325	1081	839	541	748	848	1250	689	1004	1065	698	1241	768	610	1289	900	659	428
FBgn0015521	RpS21	6330	5892	7269	7469	10305	11171	9294	10348	5746	6057	10774	14465	7097	10832	9967	10575	6020	10529	7348	7827	6460	6302	12245	8002
FBgn0015522	olf186-M	604	273	1401	887	578	168	789	808	360	434	852	1038	720	581	1417	1434	339	814	851	593	492	342	1053	586
FBgn0015524	otp	913	384	243	192	1314	526	596	529	417	357	425	480	652	403	314	371	441	809	355	234	698	519	258	205
FBgn0015527	peng	1233	815	742	681	2142	1283	1281	1382	1064	830	848	858	1339	1147	1063	1089	1082	1419	1042	856	1148	1109	1086	663
FBgn0015543	snoRNA:Me28S-A1322	22	4	35	20	15	20	15	15	18	11	17	24	27	8	27	37	16	41	27	11	21	16	46	16
FBgn0015544	spag	939	467	346	359	1040	784	732	519	518	380	425	543	495	416	406	501	352	612	439	330	540	434	393	287
FBgn0015546	spel1	450	313	451	359	838	479	676	526	533	362	412	451	433	255	532	556	240	508	444	364	571	477	527	290
FBgn0015550	tap	14	11	3	2	16	14	7	2	5	6	4	0	3	0	5	2	2	3	1	1	12	4	2	0
FBgn0015553	tos	70	30	40	16	159	85	67	59	64	42	43	83	88	60	60	41	80	100	56	41	73	56	31	19
FBgn0015558	tty	8694	3260	3257	2756	9365	2963	5925	3361	5154	3229	3692	3904	6210	2621	3463	3946	3355	6184	4244	2154	6176	4457	2246	1466
FBgn0015561	unpg	40	14	14	7	27	38	31	22	13	18	17	31	29	6	26	20	15	35	9	5	19	18	11	7
FBgn0015568	alpha-Est1	563	439	1638	1436	862	315	805	710	778	1337	1154	1127	686	712	1913	1718	587	1392	1441	1525	667	658	2494	1044
FBgn0015569	alpha-Est10	135	46	362	338	109	65	261	226	185	270	433	404	371	296	1703	1371	199	515	417	372	240	199	736	284
FBgn0015570	alpha-Est2	152	83	973	1085	121	112	132	126	65	196	377	328	150	194	1207	911	77	330	546	585	230	172	914	276
FBgn0015571	alpha-Est3	253	167	371	302	354	396	335	295	230	238	418	442	217	198	460	531	296	387	570	462	320	239	527	290
FBgn0015572	alpha-Est4	23	26	42	34	26	13	35	12	39	20	43	35	25	34	36	50	29	41	29	33	30	14	44	28
FBgn0015574	alpha-Est6	0	2	0	0	1	0	2	0	0	1	0	5	0	0	0	0	0	0	2	0	0	0	0	0
FBgn0015575	alpha-Est7	1961	1312	5698	4594	1938	920	3019	3110	2257	2175	4512	4029	2577	2361	8730	9137	1455	3238	4964	4132	1855	1753	9216	3287
FBgn0015576	alpha-Est8	1261	692	1915	1809	884	593	1601	1426	844	989	1883	2013	1461	838	4133	3562	665	1485	2410	1745	1316	918	3148	1438
FBgn0015577	alpha-Est9	2058	1249	1689	1420	2078	1368	2567	1876	1004	1075	1685	1739	2041	1185	2732	2610	1077	2457	1998	1470	2152	1469	2108	1051
FBgn0015582	dare	730	430	331	288	983	645	712	659	424	374	405	442	554	370	553	594	405	707	519	389	697	567	493	339
FBgn0015583	Acp29AB	0	0	0	0	0	0	0	0	0	0	0	0	0	0	0	0	0	0	0	0	0	0	0	0
FBgn0015584	Acp53Ea	6	4	2	0	14	0	6	0	0	5	3	0	4	3	0	0	1	0	10	4	1	0	0	0
FBgn0015585	Acp63F	1	1	1	1	2	0	5	0	0	0	12	3	6	2	19	20	4	7	8	8	0	0	0	0
FBgn0015586	Acp76A	4	0	0	1	2	0	0	0	0	0	2	0	0	0	0	0	0	0	4	3	0	2	1	0
FBgn0015589	Apc	7704	2958	4150	3437	7248	2633	5547	3551	5565	3735	3887	3665	6653	3147	4595	5131	2968	6367	4390	3121	7131	6097	3706	2083
FBgn0015591	AstA	2453	1155	1117	1013	3084	1483	1910	1295	1975	1358	1785	1873	2032	1298	1698	1693	1279	2197	1309	914	2387	1885	1587	971
FBgn0015600	toc	9552	4006	5306	4530	10500	4188	8628	5638	6176	4046	5123	4880	7296	3549	5833	6612	4379	7671	6212	4186	9614	7075	4937	3171
FBgn0015602	BEAF-32	1696	1001	881	799	2056	957	1440	1480	915	821	925	1267	1487	1169	1259	1303	827	1529	924	832	1495	1229	1040	671
FBgn0015609	CadN	14788	7529	6606	5993	14812	5605	12455	7461	6831	6036	9250	12524	10578	4777	6168	7536	6402	10812	6621	3235	11761	6172	4851	3504
FBgn0015614	CanB2	3255	1818	1970	1797	4575	2916	3987	3136	2379	1971	3122	4292	2949	1878	2543	2757	2138	3075	2758	1574	2896	1858	2146	1173
FBgn0015615	SMC3	2523	1271	1286	1123	3000	1089	2084	1625	1582	1123	1146	1104	2008	1260	1638	1808	1228	2104	1502	1165	2166	1932	1351	802
FBgn0015618	Cdk8	235	121	81	56	370	140	241	230	188	119	180	231	211	168	163	175	133	257	196	164	193	189	128	65
FBgn0015621	Clp	281	129	110	106	341	116	200	260	169	158	142	180	242	203	149	179	159	242	155	105	199	268	177	85
FBgn0015622	Cnx99A	9473	5338	15197	15382	9618	3978	19806	15463	10388	7969	12933	12253	8473	7336	22056	24469	7823	11927	18777	16574	8371	7156	18553	12911
FBgn0015623	Cpr	3340	2141	5732	4766	2876	1517	3238	2724	38183	37132	4698	3457	3343	2673	13995	12392	2062	4037	7769	6367	3040	2560	8358	4033
FBgn0015625	CycB3	111	35	53	46	84	22	30	21	16	27	10	24	37	40	21	14	43	84	28	16	36	25	16	12
FBgn0015663	Ugt36A1	190	92	295	241	132	101	252	234	295	260	284	270	232	124	444	471	116	224	374	213	278	195	428	198
FBgn0015664	Dref	1628	965	1021	893	2074	624	1624	1340	1017	769	1078	1209	1271	787	1172	1203	697	1240	1096	775	1508	1167	976	619
FBgn0015714	Cyp6a17	1951	1318	2270	1807	4	3	26	98	1495	1075	1348	1626	2024	1448	3424	3222	1962	2777	2645	2082	2179	1597	3575	1710
FBgn0015721	ktub	642	305	296	271	891	313	593	482	390	278	379	531	537	340	399	432	314	594	458	291	535	380	279	179
FBgn0015737	Hmu	3487	1544	2426	2068	2972	964	3033	2045	5603	4093	2764	2761	2623	1732	3761	3751	1424	3233	2522	2226	2449	2272	3365	1797
FBgn0015754	Lis-1	15127	7280	8585	7320	16099	6613	15098	8598	7795	6487	9121	8756	12557	6098	11403	12209	6414	11516	11892	6332	15349	8797	9168	5077
FBgn0015756	RpL9	17758	14199	26496	26861	24127	23138	22476	28884	12963	11130	20000	23245	13677	18383	25617	26925	11749	21943	19588	21977	16582	16522	32315	22211
FBgn0015765	p38a	267	187	279	195	480	193	309	323	217	183	306	286	223	211	295	319	217	321	245	212	231	165	268	168
FBgn0015766	Msr-110	18281	10132	29615	23522	22538	10673	24018	16208	30877	20310	24476	24310	31773	18993	39284	34899	16030	31296	34497	28533	21791	18300	30671	15422
FBgn0015770	MstProx	0	0	2	0	0	0	0	0	0	0	0	0	0	0	0	0	0	0	0	0	1	0	0	0
FBgn0015772	Nak	5657	2323	3428	2781	5285	1828	4712	2746	3552	2608	3768	3828	4756	2423	3963	4619	2423	4963	4316	2698	4982	3710	3249	2092
FBgn0015773	NetA	265	138	134	139	268	147	261	222	135	97	128	180	224	137	185	196	347	543	383	351	208	200	139	55
FBgn0015774	NetB	5385	2159	2451	1944	7077	1806	4640	2639	3477	2329	3319	3736	3219	1080	2090	2308	2345	4089	3008	1135	5883	2582	2145	1179
FBgn0015776	nrv1	3704	2093	6428	4763	1504	907	2649	1853	1738	2046	4219	3603	2769	1717	5878	5959	1775	2952	6759	4532	3932	2678	7649	3361
FBgn0015777	nrv2	9077	5295	9504	7607	6962	4684	13647	8897	5477	5466	9928	10693	7636	3914	9833	11119	5901	8796	15880	8529	10933	6308	11161	5475
FBgn0015778	rin	18963	9127	7635	7136	23911	8810	16075	10815	13303	10164	12414	17652	17354	10874	10802	12227	10789	18610	9820	6030	17385	11389	8463	7057
FBgn0015781	P5cr	1622	1014	899	824	1856	1040	1842	1889	922	910	1305	1437	1384	1026	1408	1364	739	1205	1018	912	1466	1179	1339	789
FBgn0015789	Rab10	3193	1762	2808	2428	3595	1428	3387	2566	2061	1621	2645	2398	2821	1849	3282	3277	1869	3500	3038	2241	2961	2011	3123	1471
FBgn0015790	Rab11	8938	5035	4616	3999	9909	4156	8001	8045	5669	4653	6578	7626	7450	5015	7377	7495	4520	8051	6813	4718	8289	5731	6829	4156
FBgn0015791	Rab14	8512	5101	4891	4316	9395	5341	8986	8352	5190	3758	6600	8269	4607	2479	4589	4875	2416	4015	4281	2791	8271	5265	5432	3540
FBgn0015793	Rab19	763	397	483	415	983	875	826	850	424	381	671	715	642	470	619	619	416	684	642	378	771	487	642	353
FBgn0015794	Rab18	1466	1154	1443	1114	1505	1458	1907	1782	849	1165	1713	1818	1481	1333	2015	1961	1032	1559	1410	1344	1638	1358	2158	1388
FBgn0015795	Rab7	8669	5412	7288	5794	6735	6042	11001	9199	4295	4447	7180	6668	9211	4769	10009	9938	4121	6454	8794	5445	10813	6695	7706	4219
FBgn0015797	Rab6	1629	1009	1190	1012	1976	1103	1952	1755	1101	1042	1341	1396	1630	1041	1731	1864	983	1664	1696	1223	1903	1337	1775	1046
FBgn0015799	Rbf	2073	970	903	834	2528	987	1673	1374	1654	1060	1170	1327	1790	1209	1324	1504	1116	2135	1480	1122	1753	1619	1140	876
FBgn0015801	Reg-5	1738	922	1784	1285	2119	1073	1630	1347	1766	1462	2876	2427	1948	1647	2100	2126	1573	2710	2041	1809	1651	1547	3406	3072
FBgn0015803	RtGEF	1723	833	1078	870	2306	983	1561	1106	1365	950	1042	1172	1610	914	1326	1400	1055	1767	1264	860	1583	1275	979	672
FBgn0015805	HDAC1	1812	979	927	824	2536	1120	1453	1264	1215	1075	809	929	1738	1202	1222	1294	1027	1856	840	684	2052	1680	1220	762
FBgn0015808	ScpX	2402	1394	2217	1966	2134	1744	2321	2248	1333	1411	2309	2187	1945	1575	3983	3659	1291	2336	2444	2153	1851	1570	3977	1926
FBgn0015818	Spx	621	360	272	212	748	282	552	502	359	315	320	370	484	357	390	505	272	567	284	251	523	438	394	243
FBgn0015828	TfIIEalpha	1195	782	644	610	1472	894	1076	1092	728	718	899	953	989	866	774	869	652	1168	768	718	962	906	898	612
FBgn0015829	TfIIEbeta	878	539	468	426	987	568	937	821	570	580	655	769	761	553	720	759	483	768	680	491	808	614	583	432
FBgn0015831	Rtnl2	6	0	2	1	1	0	4	3	0	4	3	0	0	0	1	2	4	0	0	2	1	2	3	3
FBgn0015834	eIF3i	6052	3567	5545	5153	6310	5121	6929	6246	3459	3122	5091	5621	4848	4373	6863	7565	3224	5878	4959	5332	5552	4785	7128	4328
FBgn0015838	Vang	953	376	542	440	1111	700	917	602	695	492	604	630	644	375	593	658	472	890	565	363	883	637	513	294
FBgn0015872	Drip	629	382	722	569	491	247	555	287	550	500	1284	1422	759	517	1282	1176	458	554	1273	610	455	302	949	418
FBgn0015903	apt	434	197	289	233	467	100	511	353	290	225	412	482	531	274	559	594	240	533	434	297	493	315	390	240
FBgn0015904	ara	529	233	223	198	546	130	378	249	270	202	226	303	342	234	232	221	179	436	243	170	350	300	233	144
FBgn0015905	ast	334	176	234	205	397	128	310	316	157	99	134	179	274	207	264	300	100	354	195	153	284	264	250	184
FBgn0015919	caup	579	234	209	204	578	233	432	280	374	243	385	373	426	188	323	279	297	435	322	247	412	358	242	175
FBgn0015924	crq	2418	1320	3897	3161	2408	1549	5058	3259	1735	1815	3069	2693	3187	1844	5286	5165	1657	2879	4128	3080	3499	2342	4669	2611
FBgn0015925	csul	347	190	270	196	249	276	264	228	239	155	223	186	217	178	248	270	134	285	230	186	261	201	255	127
FBgn0015926	dah	13	8	15	7	9	13	14	14	32	10	3	12	20	17	14	12	13	32	14	5	11	7	14	4
FBgn0015929	dpa	125	74	82	42	190	44	117	96	128	133	118	99	93	143	83	107	106	177	126	100	221	259	169	117
FBgn0015946	grim	83	18	38	32	61	40	48	37	46	18	44	34	78	16	24	42	40	77	67	21	45	27	25	14
FBgn0015949	hrg	6384	2528	3173	2371	7147	2238	4966	3441	3910	2503	3195	3530	5191	2608	3615	3879	2804	5369	3604	2215	5626	4108	2757	1682
FBgn0016013	Faa	362	246	607	570	521	251	578	526	268	368	1004	989	354	300	1088	915	304	760	898	799	389	354	1204	619
FBgn0016031	lama	4	8	8	15	17	0	2	2	0	1	2	0	8	5	4	3	2	5	2	4	3	7	3	2
FBgn0016032	lbm	628	409	394	363	887	406	627	525	455	341	506	562	521	365	466	409	373	621	433	338	581	450	488	296
FBgn0016034	mael	226	152	77	50	226	177	137	107	79	48	85	95	84	109	50	59	69	138	51	36	94	89	34	21
FBgn0016036	mei-P22	7	0	3	3	26	21	9	4	5	0	6	5	5	5	4	6	6	8	5	5	3	4	7	0
FBgn0016038	Vsp37A	1422	862	1173	1028	2200	1055	1982	1922	1209	814	1270	1286	1299	1015	1498	1685	727	1298	1266	1172	1573	1293	1472	985
FBgn0016041	Tom40	3009	1499	1879	1571	2780	863	2907	1778	1451	1211	2169	2435	2017	1013	1896	2089	1028	1918	2076	1296	2398	1495	1890	1033
FBgn0016047	nompA	211	92	160	90	226	72	135	109	321	234	146	188	317	133	320	223	148	223	163	170	217	155	196	121
FBgn0016053	pgc	3	0	13	2	2	0	3	0	4	1	8	14	3	0	2	4	0	3	5	0	2	0	2	2
FBgn0016054	phr6-4	135	87	69	73	276	145	128	138	98	76	78	48	109	79	66	94	89	193	108	73	104	83	63	41
FBgn0016059	Sema1b	2323	1003	1895	1533	2756	915	2274	1405	1605	1070	1452	1330	1980	927	2184	2156	1039	1996	1861	1018	2288	1413	1693	927
FBgn0016061	side	6369	2313	2065	1702	6786	2455	4126	2850	4777	2731	3853	5057	3583	1988	2268	2491	2335	3791	2360	1462	4108	2942	1760	1342
FBgn0016070	smg	2268	921	1982	1573	2359	884	2203	1207	1230	924	1400	1556	1717	862	1844	1893	902	1873	1615	1013	2114	1396	1348	579
FBgn0016075	vkg	2848	1226	2782	2315	1125	875	2497	1500	3987	3826	3832	4214	3671	2159	5183	5195	2286	3616	6144	5096	2905	2198	4988	2421
FBgn0016076	vri	1396	805	3126	2813	1969	1178	758	493	2248	1793	1242	960	3025	1892	999	1147	1572	3814	2299	1543	1265	894	1327	1174
FBgn0016078	wun	1867	926	1167	948	2164	892	1916	1418	1205	907	1551	1480	1719	955	1539	1703	988	1797	1710	1072	1919	1222	1698	909
FBgn0016081	fry	7970	3384	5344	4457	10243	4759	11355	8174	7068	5003	5504	5407	7607	4233	7950	8759	3931	7229	6538	4694	9291	7906	6138	3842
FBgn0016119	ATPsynCF6	8795	5433	4823	4374	7885	8639	9123	11247	6525	4710	9977	12674	6521	5825	8223	8729	5281	6768	9730	8588	6390	5310	7207	5134
FBgn0016120	ATPsynD	13384	8406	8098	7035	12182	10042	14623	16118	8028	6983	14139	18305	9286	7923	12074	13519	7515	9998	14972	13884	10913	9111	12483	8511
FBgn0016122	Acer	991	607	3391	3164	899	502	1244	934	1399	2073	1684	1229	1443	1315	4271	4299	706	1995	1762	1823	888	951	5990	2759
FBgn0016123	Alp4	1389	866	963	888	1308	901	1745	1618	1525	1445	1046	1077	1609	1155	1881	1943	847	1428	1649	1349	1174	1293	1490	1084
FBgn0016126	CaMKI	14993	7093	11290	9472	17066	6369	13251	9046	9010	7289	9297	9958	11720	6288	11416	11912	6663	13751	9212	4899	14069	8688	10141	4280
FBgn0016131	Cdk4	1157	509	620	536	214	86	237	125	182	183	283	308	219	149	570	567	130	331	494	427	225	193	401	236
FBgn0016641	PTP-ER	5240	2488	2673	2212	6227	2858	4087	3051	3347	2362	2511	2982	4307	2579	3198	3529	2361	4633	2812	2074	4374	3545	2291	1488
FBgn0016650	Lgr1	1157	492	997	775	557	310	649	573	588	462	616	515	790	469	1089	1072	548	1026	791	637	722	517	685	427
FBgn0016660	H15	102	32	49	33	99	51	72	41	49	36	58	91	85	44	67	84	39	87	68	30	66	48	68	43
FBgn0016672	Ipp	18894	13591	13297	13356	19396	16888	27867	29224	11194	9633	15671	14674	20376	14799	20325	22153	10511	16661	15421	15916	17045	14207	12626	9815
FBgn0016675	Lectin-galC1	16	26	9	6	33	8	25	30	52	44	18	36	21	46	22	34	28	37	25	24	0	2	10	2
FBgn0016684	NaPi-T	19	4	21	17	35	7	25	25	10	5	10	32	14	12	8	15	19	33	27	6	26	22	21	7
FBgn0016685	Nlp	2210	1579	1266	1317	2872	1726	1767	2135	1681	1216	1310	1545	1830	1632	1591	1742	1206	2108	1226	908	1720	1580	1789	1152
FBgn0016687	Nurf-38	4574	2829	4642	3899	5566	2928	4572	5528	3223	3152	4665	5103	4052	4227	7386	8128	2693	5212	4236	4501	3595	3393	8991	4200
FBgn0016691	ATPsynO	12889	8517	8969	7848	12234	10101	16101	17480	8025	7534	16023	19768	10058	8309	14035	15272	7426	10469	17407	16604	11158	9456	14151	8860
FBgn0016693	Past1	2854	1430	2136	2073	2920	1351	2562	1999	1678	1241	2044	1878	2057	1457	2658	2742	1300	2298	2739	2282	1996	1912	2552	1476
FBgn0016694	Pdp1	53002	26766	20126	17817	60841	22348	46702	30767	32081	26069	41899	57622	38949	20182	25725	30746	24836	41653	32739	14042	45098	19741	23389	15523
FBgn0016696	Pitslre	41574	18095	10074	10134	57883	25187	31155	26631	24187	15722	15990	22361	33716	21928	17076	21360	25643	37684	18854	12826	26432	22943	11261	11123
FBgn0016697	Prosalpha5	2887	1682	1200	1043	1696	1295	1997	1743	770	2330	1318	1420	1109	1146	1586	1534	1047	1376	2239	1138	1461	1626	1992	1135
FBgn0016698	Ptpa	1071	672	523	497	1545	914	1196	1240	946	734	876	986	1043	865	724	872	665	1241	780	674	1055	790	722	553
FBgn0016701	Rab4	4270	2723	2313	2168	4920	3704	3876	3982	2488	2002	2604	2947	2840	1973	2985	3136	2053	3302	2608	1890	3429	2585	2617	1804
FBgn0016715	Reg-2	198	177	630	502	226	199	269	469	238	302	633	471	288	507	928	1091	142	378	539	464	172	177	1091	351
FBgn0016726	RpL29	7504	6880	11265	10604	10741	9385	9062	13558	7868	6062	10504	16099	7081	10462	9753	11300	5279	10851	7236	8193	8613	8906	13495	10936
FBgn0016754	sba	5778	1921	2083	1819	5080	1354	3567	2348	2991	1918	2667	2455	3764	1822	2724	3153	1975	3719	2747	2149	3841	3182	2138	1467
FBgn0016756	Usp47	7381	3194	5310	4587	7996	3462	6189	4479	5538	4030	4640	4858	5956	3763	5749	6375	3724	6354	4923	4071	6017	5662	5213	3191
FBgn0016762	angel	444	273	181	184	708	273	513	565	250	275	378	401	365	223	366	427	227	417	348	244	493	323	304	229
FBgn0016794	dos	1327	737	898	705	1734	647	1380	979	1418	876	1125	1178	1222	729	1179	1299	637	1414	979	755	1106	1015	1014	547
FBgn0016797	fz2	3245	1431	2874	2729	2533	1084	3052	1514	1894	1541	2568	2726	2934	1610	3037	3396	1771	2993	2553	1481	3021	1670	2473	1185
FBgn0016917	Stat92E	4916	2545	6197	5577	4371	2154	4728	2775	2616	2551	3892	4100	4426	2348	7059	7251	2487	4939	5181	3045	5115	3040	5793	2460
FBgn0016919	nompB	132	61	50	30	229	110	180	199	179	137	184	246	978	621	428	478	667	1115	473	242	104	92	46	37
FBgn0016920	nompC	142	64	100	104	144	69	150	114	75	60	81	73	148	56	126	111	52	133	89	70	116	80	85	65
FBgn0016926	Pino	4720	2824	5334	3578	4614	2785	5116	4788	3346	2988	4776	4749	4876	3734	5486	5749	3564	6974	5110	3914	4683	3547	6757	3439
FBgn0016930	Dyrk2	5515	2744	4097	3385	4118	1610	5587	3327	2501	2630	3130	3088	4262	1962	3924	4370	2329	4108	5192	2736	5523	3916	3284	2255
FBgn0016970	l(2)k10201	179	136	117	91	204	295	165	170	104	124	154	197	183	161	167	136	111	180	120	94	190	140	150	99
FBgn0016974	swaPsi	7	2	4	1	47	23	20	6	11	24	9	2	19	28	17	30	18	80	30	46	24	31	19	8
FBgn0016977	spen	35429	11910	8504	7207	49020	20592	24201	19148	21828	10926	17797	20987	20866	13443	11432	13117	17569	23457	14390	7164	19397	11747	8237	6952
FBgn0016978	snRNP-U1-70K	4238	2105	1628	1569	4996	2435	3814	2848	2499	1730	2094	2318	3191	1683	2075	2252	1851	3155	1865	1477	2875	2388	1687	1204
FBgn0016983	smid	2287	1225	1647	1416	2645	1153	2309	2007	1436	1194	1385	1435	2180	1368	2050	2180	906	1911	1528	1254	2169	1646	1658	959
FBgn0016984	sktl	942	441	831	772	1152	708	1039	776	804	743	906	748	780	554	1022	959	566	884	886	766	674	624	1070	566
FBgn0017414	cag	461	269	241	212	786	521	495	639	266	213	333	337	401	337	316	381	191	432	278	170	439	317	304	174
FBgn0017418	ari-1	5707	2534	3461	2735	6431	2558	5444	3577	3147	2290	3219	3485	4396	2127	3924	4109	2548	3936	4601	2347	5847	3680	3549	1956
FBgn0017424	asRNA:CR11538	0	0	1	16	0	1	7	12	1	40	37	65	0	0	72	18	0	0	6	17	0	0	83	19
FBgn0017429	CG5989	1116	626	732	639	1256	678	1447	1194	781	776	1103	1214	857	689	947	1173	585	1057	1071	783	990	927	1152	630
FBgn0017430	Nelf-E	982	687	422	400	1225	708	857	851	614	520	587	733	1004	598	612	666	508	1011	647	423	1059	702	517	348
FBgn0017448	CG2187	0	0	0	1	6	0	0	0	0	0	0	0	0	0	0	0	0	0	2	0	0	0	0	0
FBgn0017456	Ubc84D	14	22	17	22	6	0	11	6	19	11	25	57	18	26	49	54	18	25	14	29	6	11	30	25
FBgn0017457	U2af38	1122	820	666	600	1836	1074	1336	1280	834	668	724	770	1094	861	886	941	604	1090	616	561	1432	1175	995	620
FBgn0017482	T3dh	135	94	299	318	129	146	188	202	80	80	250	212	152	120	531	502	102	215	316	211	83	68	452	126
FBgn0017545	RpS3A	20273	13201	31988	27796	26353	16929	34347	31314	14058	13783	29101	27975	17702	16108	37707	37296	13528	26340	29421	21904	22646	15626	39052	18050
FBgn0017550	Rga	6001	2752	2466	2412	7626	3850	5065	3936	3772	2873	3046	3069	4203	2758	3406	3817	2920	4709	3330	2673	4105	4129	3064	2173
FBgn0017551	Rca1	667	380	293	270	817	501	634	752	454	337	400	479	656	476	424	521	384	724	357	303	606	492	334	247
FBgn0017556	Prosalpha4T2	5	2	5	4	5	0	0	4	6	1	2	0	12	1	3	1	1	8	5	0	0	0	0	0
FBgn0017558	Pdk	5609	2894	6120	5371	7471	5011	7865	8011	3373	2548	4612	4482	4359	2708	6780	6885	3436	5528	4285	2981	3923	2730	5248	2806
FBgn0017561	Ork1	985	456	639	597	660	384	1375	1119	631	833	1062	1089	993	581	1286	1326	552	1250	1049	1131	750	755	1455	665
FBgn0017566	ND-75	20652	12431	15102	13889	21620	14413	26090	24550	12966	11596	17147	16658	17116	12342	20425	23566	10126	16098	19432	19831	16969	15464	18438	12440
FBgn0017567	ND-23	7677	5331	4552	3954	8115	6007	8518	9643	4415	4263	7615	10346	6219	4987	6390	7521	3930	6661	7382	5937	7105	5312	6100	4242
FBgn0017572	Mo25	3662	1626	2468	2297	3213	1224	3808	2537	2493	1801	2602	2653	3199	2011	3748	3936	1810	2957	2957	1929	3283	2475	2653	1740
FBgn0017577	Mcm5	46	32	47	42	71	40	48	33	35	25	41	46	24	48	53	50	39	50	51	66	25	34	42	25
FBgn0017578	Max	1689	1167	745	744	2506	1335	1453	1492	1082	917	1242	1790	1426	1117	1051	1143	1119	1687	1078	678	1488	1057	1030	717
FBgn0017579	RpL14	21042	16037	28285	27761	28994	18619	24514	29437	14702	13924	25259	28370	19474	24384	32941	35891	14462	28640	22719	25367	19030	18793	38779	24263
FBgn0017581	Lk6	37205	18988	53246	48456	98869	43607	92353	63818	60517	38962	63494	66507	78266	65666	95390	111772	38405	58788	36507	29639	62191	48788	75496	47697
FBgn0017590	klg	11540	4295	3778	3117	17290	5389	9987	8233	9354	6155	8328	11035	8426	4686	5272	5891	5698	8866	5751	3325	9566	5847	3746	2877
FBgn0019624	COX5A	15629	12557	12804	11240	15711	13515	20718	24693	10121	9788	22247	27450	17291	15504	20905	23605	11941	16456	22462	22896	16595	14089	19639	13843
FBgn0019637	Atu	1100	733	555	538	1537	666	1024	822	992	767	633	810	950	884	863	935	741	1233	703	594	873	923	652	451
FBgn0019644	ATPsynB	14238	10933	12982	12339	13534	13449	18758	22635	9418	8885	19876	24551	13100	10941	16111	17752	9150	13441	18643	18225	13778	10903	15809	10899
FBgn0019650	toy	5251	2596	2968	2612	5350	1893	4800	2606	2635	2235	3078	3332	3872	1784	3080	3576	2145	4256	3298	1785	4858	2870	2356	1234
FBgn0019660	lncRNA:roX2	4662	2645	1235	766	1918	848	2067	1529	1291	1010	1383	1806	1874	927	1248	1433	965	1910	1284	679	3946	1879	1279	760
FBgn0019661	lncRNA:roX1	146518	65179	27701	21897	159947	78761	113393	65764	92576	59506	54663	57104	83877	50724	50114	63889	54153	94193	36778	20454	127632	75741	38900	32783
FBgn0019662	qm	4751	2375	2547	2085	4793	2196	4559	3721	3249	2396	2993	2965	4100	1960	3513	3746	2233	3719	3892	2347	5060	3249	3330	1900
FBgn0019686	lok	104	88	148	97	125	103	102	91	83	53	65	81	113	105	132	166	75	170	73	73	102	94	128	43
FBgn0019809	gcm2	59	39	10	7	57	13	49	36	40	20	22	23	46	23	16	33	25	52	21	26	46	41	7	13
FBgn0019828	dj	3	0	0	0	10	0	5	10	4	0	9	22	1	0	1	1	0	3	1	1	1	0	3	5
FBgn0019830	colt	1680	1496	3375	3415	1610	1346	2140	2373	2162	3039	3449	2660	1882	2201	5984	5723	1281	2754	3191	3087	1549	1297	4615	2163
FBgn0019890	Smg5	10154	4161	5216	4231	11159	3792	8423	5804	6352	4127	5537	5462	7822	4210	6369	7171	4265	7889	6247	4587	7720	6254	5449	3623
FBgn0019925	Surf4	2084	1027	2006	1824	1910	1067	2176	1512	1295	1017	1941	1926	1871	1090	2890	2805	1029	1976	2289	1504	1733	1189	2593	1146
FBgn0019928	Ser8	2	0	0	0	6	0	3	0	0	0	1	1	0	0	0	0	0	0	0	0	0	0	0	0
FBgn0019929	Ser7	902	589	1399	1268	1041	443	1634	1758	1281	1718	1572	1765	1160	904	2977	2835	724	1617	1889	1937	869	837	3037	1488
FBgn0019932	SamDC	723	565	846	671	762	631	1047	894	318	320	535	588	501	364	1109	1169	405	568	612	435	673	414	866	408
FBgn0019936	RpS20	8797	6746	17395	19177	11350	13698	11252	11699	6207	5878	14258	18369	8810	10799	16279	17116	8502	12757	10919	10827	7184	7037	20489	12266
FBgn0019938	Polr1A	820	430	559	492	1280	525	800	643	549	445	464	622	557	467	617	661	505	772	558	504	666	568	611	393
FBgn0019940	Rh6	16007	13409	19860	20493	5845	8271	21151	21832	6312	6951	13191	13844	17985	16322	25342	25594	7654	14125	15122	15386	7716	6379	12107	9603
FBgn0019949	Cdk9	910	526	435	361	1351	610	1022	870	562	469	673	791	675	448	558	688	446	775	737	549	721	625	545	448
FBgn0019952	Orct	652	377	719	768	507	399	910	781	752	916	476	570	606	431	844	895	275	678	576	515	438	370	690	404
FBgn0019957	ND-42	8632	5769	6651	5489	9434	7686	12953	13308	5120	4892	9947	10817	6798	5184	8987	10030	4709	6630	10477	9188	8359	6664	8886	5772
FBgn0019960	Mitofilin	8860	4493	6379	5613	8322	4269	9707	9350	5260	4150	6577	6640	6960	4233	8818	9572	4161	6587	8652	6979	7894	5992	7686	4545
FBgn0019968	Khc-73	9018	3561	5390	4498	10539	3749	8249	4861	5492	3967	5210	4925	7656	3145	6045	6608	4239	7610	6194	3682	9161	6039	4844	2758
FBgn0019972	Drice	499	222	261	182	534	279	410	256	311	303	390	342	334	248	476	526	269	393	598	364	367	358	529	256
FBgn0019982	Gs1l	4561	3569	2352	2343	5115	4407	4988	6540	2526	2668	4213	4546	4115	3952	5044	4942	3250	4706	4763	4287	4010	3757	4517	3122
FBgn0019985	mGluR	3143	1757	2054	1688	2858	1212	2788	1128	1496	1443	1835	2197	2548	1135	1739	2036	1367	3115	2233	835	3473	1727	1365	683
FBgn0019990	Gcn2	1184	519	960	761	1239	481	991	593	710	577	627	664	1002	594	1067	1106	529	1175	828	602	1061	800	696	351
FBgn0020018	Ppox	502	343	363	383	491	413	481	519	371	315	337	349	352	326	441	450	294	471	362	349	420	471	473	258
FBgn0020224	Cbl	4932	2419	2224	1963	6980	2838	4726	3155	3561	2553	3143	4199	4383	2432	2741	3446	2550	4832	2662	1829	4230	3092	2095	1627
FBgn0020235	ATPsyngamma	16497	9978	13063	11589	14739	10221	18711	19615	10143	9467	19239	21832	11920	9534	16985	19726	8149	13003	21325	21736	13520	11888	17619	11289
FBgn0020236	ATPCL	9511	4208	7418	6433	10721	4632	10257	6687	6146	5272	7538	6157	7351	3806	10370	10034	4225	7632	8943	7338	8650	7484	10264	4367
FBgn0020238	14-3-3epsilon	35813	15968	19412	17455	34910	12994	33708	25346	20296	14105	23645	28605	29017	14435	25936	28427	16171	28657	27505	15346	36143	18993	21880	13091
FBgn0020248	stet	150	71	51	43	140	28	59	75	59	69	51	73	73	76	54	51	70	118	56	24	73	59	29	22
FBgn0020249	stck	3529	2048	2237	1972	5199	2850	3590	3194	2550	2395	3154	3876	4306	3570	3660	4375	3672	5935	4363	3095	3066	2687	2840	1896
FBgn0020251	sfl	2757	1271	2001	1868	2313	1041	2406	1470	1390	1100	1829	1742	2001	948	2084	2212	1238	1913	2146	1299	2534	1513	1725	825
FBgn0020255	Ran	5494	3329	3442	3367	7224	3366	5580	5029	3574	2899	4345	5260	3918	2919	3855	4004	2346	4343	3668	2660	4893	3479	4471	2807
FBgn0020257	Ppa	2173	939	1156	1094	2169	947	2085	1113	1127	880	1432	1573	1589	843	1552	1581	1136	1699	1625	966	2247	1272	1409	860
FBgn0020258	ppk	112	34	49	49	139	69	77	62	69	66	98	106	86	52	71	65	67	92	63	48	104	64	80	56
FBgn0020261	pcm	2890	1281	1156	983	2841	940	1939	1350	1820	1262	1387	1647	2154	1278	1563	1594	1179	2337	1629	1096	1825	1781	1087	728
FBgn0020269	mspo	6354	3100	2327	2103	6827	2527	4667	3499	3401	2650	3391	3639	4649	2646	2744	3382	2820	4418	3138	2055	4897	3492	2482	1984
FBgn0020270	mre11	532	385	250	208	2537	1392	1523	1659	553	441	379	395	440	453	284	319	543	847	472	368	477	464	331	263
FBgn0020272	mst	124	43	82	99	125	98	167	128	111	96	82	93	121	70	121	128	65	124	107	58	123	83	122	71
FBgn0020277	lush	36	103	130	54	40	5	24	82	41	31	44	51	163	85	178	216	61	117	104	60	28	57	126	15
FBgn0020278	loco	1586	785	1066	805	1947	907	1684	1444	930	984	1315	1336	1481	1062	1447	1506	868	1853	1519	1090	1028	952	1164	799
FBgn0020279	lig	10278	3986	5816	4862	10178	2890	8593	5663	6562	4959	6055	6476	8931	4679	7933	8174	4587	9084	7531	6071	8489	7550	6560	4298
FBgn0020280	laf	1	0	0	0	0	0	0	0	0	0	0	0	0	0	0	0	0	0	0	0	0	0	0	0
FBgn0020294	ko	1301	566	586	499	1218	483	1018	686	644	495	574	796	888	491	717	720	459	830	831	521	927	795	608	426
FBgn0020299	stumps	1255	602	1064	827	998	642	1174	894	944	579	1049	1162	989	529	1068	1246	583	1122	1384	845	1026	872	1120	657
FBgn0020300	geko	219	113	216	175	122	37	142	113	286	168	270	234	211	157	357	297	136	209	217	183	207	173	296	222
FBgn0020304	drongo	4894	1897	4238	3346	4159	1414	4513	2714	3791	3049	4650	4114	3880	1797	4528	4678	2147	3881	5060	3385	4635	3824	5258	2784
FBgn0020305	dbe	536	419	296	280	887	402	544	675	414	365	422	523	571	481	441	442	440	685	421	325	488	470	442	279
FBgn0020306	dom	5800	2217	3834	3326	6736	2038	4776	3054	4350	3158	3246	3300	5459	3021	4487	4848	2685	6405	4057	3200	4777	4387	3377	1996
FBgn0020307	dve	1012	516	591	479	865	230	1087	744	666	563	614	616	1079	518	953	1089	477	1006	754	612	1178	777	757	449
FBgn0020309	crol	10820	4450	5763	4739	11416	3473	9000	5049	7206	4786	6863	7376	9399	4337	7011	7669	5477	9761	7690	4130	9821	6700	5353	3384
FBgn0020312	Tmtc3	1383	841	903	788	1724	709	1191	897	1069	926	1011	891	1277	754	912	1017	691	1323	961	638	1382	1091	828	454
FBgn0020369	Rpt6	6158	3606	2273	2167	3888	3378	4545	4257	2134	4784	2903	3276	3101	2751	3721	3934	2474	3257	4282	2640	3582	3823	3895	2486
FBgn0020370	TppII	5963	2332	2187	1823	4086	1772	3102	2256	2403	3524	2204	2248	2758	1790	2556	2652	1785	3022	3654	1912	3000	3095	2404	1407
FBgn0020371	Tim17b2	0	0	0	0	0	0	0	0	0	0	1	0	0	0	0	0	0	0	0	0	0	0	0	0
FBgn0020372	TM4SF	23291	12131	9013	7320	21785	13534	21069	20360	10802	10236	16760	22375	14650	8122	11959	14199	9995	13754	19066	11694	17304	11580	9789	7301
FBgn0020376	Sr-CIII	1	0	0	1	0	0	0	0	1	0	0	0	4	0	0	2	3	1	1	0	1	0	2	0
FBgn0020377	Sr-CII	7	8	7	3	16	1	7	0	2	1	4	9	10	7	1	4	4	8	3	9	8	1	0	8
FBgn0020378	Sp1	836	375	257	150	1161	302	623	496	529	415	489	701	632	361	539	459	514	800	401	295	436	355	315	248
FBgn0020379	Rfx	2002	820	930	825	2459	1026	1603	1146	1418	871	978	1165	1393	631	946	1047	848	1757	1125	744	1631	1327	777	543
FBgn0020381	Dredd	786	511	482	438	1270	712	1019	860	544	425	624	787	859	724	920	930	647	1276	768	648	604	569	647	374
FBgn0020385	pug	1539	913	9682	6516	1661	952	3563	5556	1534	2802	7729	4242	1303	1691	13953	12672	1043	2436	4275	5028	463	412	12489	2247
FBgn0020386	Pdk1	5621	2737	5709	4817	4672	2466	6098	3663	3139	2664	4632	4201	5139	2419	5692	5927	3347	5098	5637	3252	6474	3620	4374	2682
FBgn0020388	Gcn5	1914	945	1124	908	2384	1006	1733	1318	1433	1166	1225	1083	1511	1023	1281	1444	873	1790	1178	1043	1764	1519	1344	799
FBgn0020389	Papss	1812	880	948	985	2457	1069	1512	1264	1484	1016	1118	1300	1594	982	1420	1212	976	1614	1603	1263	1488	1358	1422	847
FBgn0020391	Nrk	637	296	259	226	748	243	500	406	434	340	413	375	611	378	340	382	330	553	298	240	639	528	291	225
FBgn0020392	Nmt	767	443	555	494	832	288	770	684	398	409	356	487	525	404	644	638	344	539	578	408	605	440	577	277
FBgn0020399	Mst89B	3	1	0	2	4	0	7	5	1	2	3	0	2	2	2	6	0	1	1	0	3	6	2	0
FBgn0020407	asun	329	155	263	221	489	231	373	311	199	194	234	238	293	191	269	310	184	320	288	143	335	265	252	107
FBgn0020412	JIL-1	3609	1517	1665	1500	4385	1943	3096	1876	2406	1412	2254	2253	2494	1468	2013	2236	1888	2573	1853	1148	2740	1866	1599	1083
FBgn0020414	Idgf3	3089	1885	3002	2640	3001	1824	3338	2793	3229	2686	2606	2369	2318	2330	2807	2944	1703	3465	2342	2164	2585	1995	4420	1999
FBgn0020415	Idgf2	1631	1201	5154	4456	1760	1277	2443	2562	2503	2407	2545	2340	1464	1492	5185	5016	1217	2520	2533	2382	804	614	4477	1848
FBgn0020416	Idgf1	562	488	2195	1522	821	500	692	805	1880	1882	1205	824	589	698	2272	2437	490	1006	806	693	346	345	2653	823
FBgn0020429	GluRIIB	3	2	3	2	6	0	5	11	0	1	5	1	9	0	8	4	1	5	14	1	2	4	3	1
FBgn0020440	Fak	3620	1387	1706	1414	3584	1268	2723	1702	2069	1474	1737	1836	2247	1121	1769	2049	1345	2478	2008	1073	2896	2123	1492	936
FBgn0020443	eRF3	2375	1045	2174	2032	2518	1111	2138	1295	1536	1190	1517	1534	1910	1154	2664	2614	1177	2134	2026	1482	2142	1604	2716	1064
FBgn0020445	E23	371	134	264	246	231	129	345	250	283	181	248	241	310	131	316	362	191	281	362	197	277	171	201	103
FBgn0020493	Dad	1889	937	1708	1402	1785	835	2099	1278	1152	836	1293	1284	1521	852	1813	2021	913	1555	1652	1158	1750	1197	1510	775
FBgn0020496	CtBP	15705	7599	5917	5285	20479	8738	12213	9286	11087	7206	9729	12729	11290	7005	7885	8762	8438	13176	8395	4853	11991	7536	6881	4636
FBgn0020497	emb	4112	1749	2905	2476	4246	1528	3666	2274	2617	1657	2055	2368	3094	1461	3053	3102	1728	2921	2588	1552	3730	2395	2445	1259
FBgn0020503	CLIP-190	12040	5686	9235	7763	12737	4567	11116	8791	9065	5778	10461	11995	12240	8795	11297	11991	11235	19253	11753	8547	8381	5656	8140	5094
FBgn0020506	Amyrel	1	0	2	1	0	0	0	0	1	2	4	4	4	0	1	0	1	6	2	6	0	0	10	7
FBgn0020508	Ag5r2	11	3	4	3	6	0	9	17	15	4	1	0	0	1	0	0	0	3	5	0	2	2	0	3
FBgn0020509	Acp62F	0	0	0	3	1	0	2	4	0	5	4	0	0	0	3	0	0	0	1	1	2	0	0	0
FBgn0020510	Abi	1911	844	996	764	1809	663	1537	1038	1213	862	1184	1254	1617	872	1277	1409	931	1662	1358	949	1688	1230	1044	610
FBgn0020513	Paics	3153	2062	13047	6601	2305	816	3887	4823	1456	2513	9661	4756	2340	2305	10692	11928	2039	4644	6050	4952	1612	1303	16603	3375
FBgn0020518	snoRNA:Me28S-G764	0	0	0	0	0	0	0	0	0	0	0	0	0	0	0	0	0	0	0	0	0	0	0	0
FBgn0020521	pio	2795	1037	2492	2051	3316	1324	3619	2327	2497	1948	4143	4401	3193	1966	4541	4068	2438	3762	6353	4403	3088	2397	3818	2177
FBgn0020545	kraken	1903	1374	1585	1308	2946	2316	2113	2256	1761	1787	1749	1618	1994	2277	2069	2038	1456	2758	1638	1593	1884	1652	2142	1407
FBgn0020546	lncRNA:iab4	0	0	0	0	0	0	1	0	0	0	0	0	0	0	0	0	0	0	0	0	0	0	0	0
FBgn0020556	lncRNA:bxd	0	0	0	0	0	0	0	0	0	0	0	0	0	0	0	1	0	0	0	0	0	0	0	0
FBgn0020616	SA	1953	858	1082	934	1921	984	1451	1080	1144	852	1027	1200	1371	873	1083	1219	809	1406	1063	676	1751	1310	942	580
FBgn0020617	Rx	843	409	207	168	1294	486	631	499	545	420	317	377	623	393	301	378	362	752	342	241	548	542	265	189
FBgn0020618	Rack1	27165	19502	35190	35409	35201	28314	31387	36691	21140	22131	33531	39538	24030	28266	37106	39439	20641	40312	29418	33718	25231	27482	49400	30491
FBgn0020620	RN-tre	3494	1577	1746	1362	3852	1344	3206	2396	2151	1700	2354	2425	3052	1642	2347	2534	1820	3191	2352	1476	3069	2267	1849	1170
FBgn0020621	Pkn	7943	3893	7733	7164	8327	5247	13766	10062	5760	4428	6259	4736	9816	4709	12080	12772	4807	8084	8708	6603	11439	8120	8607	5008
FBgn0020622	Pi3K21B	1153	662	993	856	1186	765	1508	816	697	575	968	889	1174	553	1122	1075	627	1040	1144	476	1442	743	792	402
FBgn0020626	Osbp	3429	1842	2213	2112	4099	2050	3705	2744	2347	1983	2665	2377	3332	2021	3282	3440	1799	3404	3083	2592	3150	2683	2679	1436
FBgn0020633	Mcm7	25	9	34	23	0	0	14	8	5	25	19	10	8	11	52	41	9	17	45	49	14	21	57	40
FBgn0020637	Lcp65Ag2	22	14	39	21	4	0	5	1	6	2	19	45	7	10	32	26	19	19	54	58	11	12	21	33
FBgn0020638	Lcp65Ag1	0	0	0	0	0	0	0	0	0	0	0	0	0	0	0	0	0	0	3	0	0	0	0	0
FBgn0020640	Lcp65Ae	0	0	0	0	0	0	0	0	0	0	0	0	0	0	0	0	0	0	0	0	0	0	0	1
FBgn0020641	Lcp65Ad	13	5	3	3	3	0	6	0	0	0	0	0	7	3	1	1	2	1	0	0	0	0	0	0
FBgn0020642	Lcp65Ac	52	38	67	50	191	124	111	137	59	120	79	126	79	102	60	35	103	69	519	158	20	40	22	9
FBgn0020644	Lcp65Ab1	0	0	0	0	0	0	0	1	0	0	0	0	0	0	0	0	0	0	0	0	0	0	0	0
FBgn0020645	Lcp65Aa	0	0	0	0	0	0	0	0	0	0	0	0	0	0	0	0	0	0	0	0	0	0	0	0
FBgn0020646	Lcp65APsi	1	0	0	0	0	0	0	0	0	0	0	0	0	0	0	0	0	0	0	0	0	0	0	0
FBgn0020647	KrT95D	12000	5467	5594	5361	11930	6142	9442	6758	7463	5627	5436	5286	7414	4076	5253	5966	4768	7109	5706	3691	8409	7052	4789	3316
FBgn0020653	Trxr-1	8751	5079	6161	6011	8879	5134	9172	8200	5582	4661	7581	7548	7162	5486	9876	9303	4928	8687	8335	7615	7533	6921	8437	5348
FBgn0020655	ArfGAP1	2686	1454	1582	1543	2855	1721	2692	2316	1984	1534	1959	2119	2470	1769	2350	2601	1580	2629	2069	1865	2137	2031	2175	1455
FBgn0020660	eIF4B	3307	2418	1909	1628	3949	1992	3287	2956	1856	1552	2493	3359	3328	2592	2507	2678	1807	3309	2009	1381	3486	2242	2324	1404
FBgn0020762	Atet	4422	1812	2688	2045	4359	1538	3949	2371	3406	2606	3359	3297	3324	1573	3044	3177	2374	3649	4033	2446	4659	3419	3829	2043
FBgn0020764	Alas	4886	2808	3666	3199	5329	2742	5178	5018	4768	3751	4600	5065	4200	2909	5158	5955	2699	4469	4533	4742	4980	4030	5186	3444
FBgn0020765	Acp65Aa	50	48	22	20	6	75	10	16	18	28	28	21	8	21	16	5	21	13	65	18	12	24	40	29
FBgn0020767	Spred	12523	7067	5160	4431	16075	5605	13238	8001	7124	6561	8338	9998	10187	4932	6749	7283	6290	10908	7586	3708	11609	6584	5534	3513
FBgn0020880	CG7179	0	0	0	0	0	0	0	0	0	1	0	0	0	0	0	0	0	1	0	0	0	0	0	0
FBgn0020887	Su(z)12	1947	888	945	736	1879	598	1626	927	1363	966	1083	1084	1582	852	1168	1253	897	1579	1374	865	1541	1350	953	665
FBgn0020906	Jon25Bi	0	0	1	0	0	0	2	0	0	0	5	0	0	1	1	0	0	2	0	0	0	0	0	0
FBgn0020907	Scp2	6942	3703	4299	3752	7424	3862	7399	6082	2987	2930	5077	5395	4342	2320	5481	5649	2767	4058	7319	4355	6939	4071	6517	3657
FBgn0020908	Scp1	1117	1729	6162	4322	1494	505	7706	4058	646	635	4560	9200	1963	99	2417	5320	826	1695	4380	4147	1841	160	1462	893
FBgn0020909	Rtc1	364	222	220	238	408	214	323	280	244	194	277	307	345	203	257	260	163	287	200	184	343	270	310	168
FBgn0020910	RpL3	52903	31967	60688	57566	64867	38196	51143	52367	46955	47200	53658	64345	44936	52280	69581	74873	36095	70662	48439	55219	37990	42502	73284	44204
FBgn0020912	Ptx1	608	302	141	124	916	285	479	337	335	309	259	328	503	244	253	263	311	506	249	153	384	338	149	108
FBgn0020930	Dgkepsilon	2341	1242	2127	1968	2495	1519	3904	3463	2625	2435	2752	3009	2674	1873	3596	3701	1264	2313	2886	2611	3011	2382	3177	2002
FBgn0021738	Crg-1	1304	835	481	515	1472	609	1508	1517	977	868	1065	1503	1007	675	825	936	789	1340	1084	547	2277	1073	835	575
FBgn0021742	C901	50	27	6	12	2217	798	1099	732	40	21	18	16	63	28	13	24	34	51	20	6	21	30	10	13
FBgn0021750	SerRS-m	625	406	378	344	806	243	570	479	451	326	335	447	578	413	466	551	334	684	427	331	524	476	395	214
FBgn0021760	chb	3354	1246	2438	1906	3834	1564	3265	2013	2053	1543	1947	1966	2367	1151	2396	2421	1324	2502	2256	1595	2740	2291	1977	1048
FBgn0021761	Nup154	1001	490	524	466	882	495	675	397	642	401	437	493	752	398	555	518	489	845	592	334	612	494	419	309
FBgn0021764	sdk	1632	708	1320	1144	2314	1127	2777	1630	1119	812	1036	1083	2150	900	1997	2250	1100	1690	2354	1463	1860	1254	1314	927
FBgn0021765	scu	1831	1610	3004	3050	1794	1338	1981	2380	1475	2040	3917	3836	3227	3668	6006	5913	2024	4292	3279	3228	1266	1468	6053	2980
FBgn0021767	org-1	4	0	0	0	7	0	1	0	0	6	3	0	0	0	0	0	0	2	0	2	0	1	0	0
FBgn0021768	nudC	1022	687	547	522	803	420	610	541	458	706	528	600	515	400	549	567	294	607	534	326	704	578	664	414
FBgn0021776	mira	54	11	20	13	32	26	39	27	8	14	16	13	21	5	12	12	16	21	5	8	9	16	13	5
FBgn0021795	Tapdelta	1665	1187	1642	1857	2164	1289	1970	1891	1474	1170	1816	1996	1581	1609	2117	2006	959	1804	1682	1511	1629	1525	3003	1830
FBgn0021796	Tor	2463	1125	1495	1272	2688	1608	2224	1845	1628	1268	1225	1033	1927	1245	1718	1931	1059	2106	1520	1122	1962	1650	1405	802
FBgn0021800	Reph	13760	4656	4849	4288	12311	3282	9074	5283	7907	4578	7633	8362	9131	4170	6067	6948	6941	8210	6743	3266	13891	7137	5875	4319
FBgn0021814	Vps28	1694	1257	974	825	1726	1120	1585	1855	951	1057	1542	1839	1445	1261	1256	1412	817	1608	1069	1101	1436	1386	1529	1061
FBgn0021825	DCTN2-p50	3247	1955	1691	1583	3907	1851	3722	3852	2263	1927	2647	2866	3004	2320	2666	3009	1819	2964	2497	2314	2972	2733	2630	1854
FBgn0021847	Ttc7	4376	2289	2425	2303	7550	3288	5616	4426	2732	2045	2342	2252	3381	1941	3077	3257	1798	3471	2643	1947	3894	3155	2501	1535
FBgn0021856	l(2)k14505	1173	705	621	591	1286	1081	1225	1203	656	548	910	1153	845	612	755	914	544	799	818	644	1048	855	881	544
FBgn0021872	Xbp1	11216	8015	11652	10888	14399	9146	12291	13088	9235	7816	10484	9705	10507	10547	13931	14365	8731	14323	11873	11360	9450	8687	13760	9232
FBgn0021874	Nle	528	395	331	342	838	783	547	553	332	311	355	403	449	438	458	513	322	601	324	316	548	460	535	340
FBgn0021875	Zfrp8	605	459	338	317	835	304	498	513	410	241	282	422	407	371	320	345	285	585	320	197	419	362	340	220
FBgn0021895	ytr	4049	2080	2376	2127	4525	1466	3131	2212	2773	1922	2318	2831	3221	1922	2476	2629	1753	3704	1801	1255	3602	2770	2444	1396
FBgn0021906	RFeSP	14476	10276	10786	10063	14543	13811	17737	21796	10931	10281	17497	20240	12859	11160	15193	18604	8560	13219	16238	16898	12368	11652	14763	10882
FBgn0021944	Coprox	657	438	375	419	789	453	672	623	490	407	413	462	603	497	559	573	347	570	499	444	530	425	488	331
FBgn0021967	ND-PDSW	6312	4879	4467	4273	6135	6746	6867	9126	3638	3085	6519	8051	4366	4002	5343	6182	3412	4548	5853	5744	4752	3919	5818	4328
FBgn0021979	l(2)k09913	15057	7930	10105	9139	12629	7822	16407	15150	8844	7732	11917	11587	12781	8098	13476	14910	6314	11650	14106	11130	12220	10263	11236	7755
FBgn0021995	Rs1	2255	1651	1082	1026	1247	732	809	870	644	454	544	522	783	653	650	613	555	840	604	503	691	613	809	446
FBgn0022023	eIF3h	6302	3100	5438	4604	6832	3711	5464	4789	3749	3269	4894	5726	4442	4394	5641	6187	3165	6108	4557	4724	5140	4440	6838	4112
FBgn0022027	Vps25	1097	1031	663	688	1856	1972	1329	2118	855	817	954	1273	1281	1595	1092	1250	1047	1480	916	972	976	927	932	756
FBgn0022029	l(2)k01209	1310	663	788	704	1629	723	1112	944	831	638	757	852	1105	832	1093	1136	677	1452	897	698	1117	921	928	647
FBgn0022069	Nnp-1	1224	763	692	653	1817	946	1239	1108	916	612	696	766	1032	795	867	966	638	1153	782	548	1232	947	929	525
FBgn0022097	Vha36-1	7866	5805	4517	4121	8167	8656	9120	11915	3957	4830	6798	8544	6987	5713	6385	7090	4460	7092	6442	5199	8978	6941	7071	4983
FBgn0022153	l(2)k05819	2078	807	1143	1052	2842	1175	2275	1411	1732	1374	1281	1358	1792	941	1334	1613	952	1857	1344	1043	2369	1984	1413	812
FBgn0022160	Gpo1	8668	4319	5310	4913	9021	5739	8497	7926	5151	4659	6517	7848	6414	4560	6767	8063	4866	7815	9229	8660	6229	6005	6482	4652
FBgn0022213	Cse1	678	276	457	403	731	285	619	372	420	323	333	337	473	268	567	576	240	664	390	266	666	433	470	231
FBgn0022224	ubl	164	154	169	140	234	238	221	194	83	104	158	200	167	167	153	181	113	145	116	108	169	147	145	118
FBgn0022238	lolal	7355	4236	2509	2208	5834	2520	4766	3488	3016	2790	3488	5475	4321	2505	3469	3918	2747	4864	3761	1864	4888	2692	3156	2136
FBgn0022288	l(2)09851	462	285	357	335	580	304	535	457	301	266	292	262	345	315	447	427	280	405	353	358	645	495	590	373
FBgn0022338	dnk	485	265	236	209	534	403	458	409	337	239	330	513	453	335	341	342	281	501	361	273	467	388	325	207
FBgn0022343	CG3760	1924	1188	1097	1053	2194	1165	1564	1682	1157	1016	1306	1524	1514	1271	1344	1396	1034	1617	1331	1088	1335	1285	1437	937
FBgn0022344	CG10340	1917	1170	1018	898	2323	1509	2103	2471	1112	1011	1405	1868	1489	1217	1645	1715	1051	1689	1790	1388	1742	1483	1469	1143
FBgn0022349	CG1910	2942	1313	1872	1719	2848	1155	2095	1473	1853	1270	1543	1399	2597	1379	2505	2380	1321	2382	1844	1458	2483	2066	2007	1104
FBgn0022355	Tsf1	18295	12615	19837	20578	28030	13411	35114	35673	65558	66284	51786	42895	24781	27465	44517	43422	15039	43220	32627	50825	31632	35734	87649	35467
FBgn0022359	Sodh-2	151	138	98	88	1688	1618	3300	3417	474	555	1177	1396	1560	1191	2079	2087	1125	2153	1840	2003	1218	1380	2687	1595
FBgn0022361	Pur-alpha	8491	5523	6447	5009	7725	3670	11641	5037	3624	4172	7447	7885	8219	3187	7344	7400	3990	6877	9433	3234	12361	4754	6153	2860
FBgn0022382	Pka-R2	15888	8598	5847	4867	17720	8042	11845	7885	8902	8506	9033	14316	13770	7760	7807	9342	9059	17066	10030	4906	15845	8700	6740	4697
FBgn0022699	D19B	2535	1292	1095	974	3101	1265	2009	1956	1680	1357	1365	1484	1929	1469	1430	1636	1072	1990	1224	1217	2080	2043	1245	885
FBgn0022700	Cht4	0	0	0	28	0	0	1	0	0	5	0	0	0	0	0	1	0	2	0	0	0	1	0	1
FBgn0022702	Cht2	217	76	295	304	87	87	131	55	111	383	490	428	87	85	163	122	245	199	1175	640	102	112	302	195
FBgn0022709	Ak1	4615	2923	2821	2428	4499	3125	3739	3981	2690	3408	3432	4360	2856	2283	2495	2852	2162	3177	3648	2805	4124	3482	3872	2464
FBgn0022710	Ac13E	2622	1224	2856	2614	2295	1040	2923	1585	1687	1421	3022	2893	3082	1298	3511	3521	1835	2784	3462	2520	2722	1753	2716	1422
FBgn0022724	Taf8	306	200	107	93	413	174	253	245	219	165	156	222	247	195	153	179	203	301	166	127	275	188	147	115
FBgn0022740	HLH54F	5	0	3	0	3	0	1	0	6	1	2	3	0	0	1	2	1	4	1	4	0	4	4	2
FBgn0022764	Sin3A	9821	3538	4816	4095	11116	3260	7900	4689	6083	4141	5129	5046	7585	3635	5766	6238	4189	7933	5444	3904	7939	6618	4253	2568
FBgn0022768	Pp2C1	3461	1332	1468	1397	4140	1434	3252	2044	2032	1389	1842	1648	2666	1313	2225	2432	1651	2717	2030	1721	2936	2484	1690	1121
FBgn0022770	Peritrophin-A	149	78	72	53	34	104	121	16	80	103	132	66	33	26	122	112	108	104	575	249	62	101	92	87
FBgn0022774	Oat	829	611	1473	1379	480	463	1133	1168	365	733	1806	1368	609	595	2093	1932	527	984	1460	1599	609	582	2705	1031
FBgn0022786	Hira	689	291	312	263	627	217	477	341	435	310	328	325	479	320	414	409	237	576	348	310	501	398	361	193
FBgn0022787	Hel89B	5013	2242	2934	2607	5678	2661	4638	3440	3371	2718	3220	3487	4131	2515	3594	3962	2721	4362	3355	2483	4505	3664	2813	2132
FBgn0022800	Cad96Ca	411	225	384	332	410	62	431	365	413	362	531	531	391	220	510	548	327	524	681	470	427	312	413	320
FBgn0022893	Df31	5601	2963	3019	2553	6096	2715	4694	3662	3327	2635	4447	5518	5239	2875	4086	4073	2774	5205	4434	2410	7397	3861	5014	2734
FBgn0022935	D19A	2178	1077	1002	879	2450	882	1397	1209	1379	984	1188	1222	1665	1091	1141	1315	1086	1965	1073	936	1693	1596	994	616
FBgn0022936	CycH	405	230	167	203	279	85	191	211	151	122	115	173	154	166	169	181	154	232	143	114	185	163	164	114
FBgn0022942	Cbp80	1463	775	953	786	1785	791	1256	1101	928	710	785	843	943	566	994	1027	517	962	796	631	1085	1081	942	524
FBgn0022943	Cbp20	690	486	358	342	855	1031	792	770	493	396	545	789	591	641	575	600	422	692	523	342	638	504	496	382
FBgn0022959	yps	9525	4847	11712	11052	10834	4026	13848	9678	13975	8751	10668	11801	14219	9144	12817	13975	6953	13727	8414	7286	13502	11541	12585	7747
FBgn0022960	vimar	1309	724	675	573	1505	625	1138	870	762	637	808	755	1096	557	781	859	577	1119	804	492	1124	937	652	369
FBgn0022981	rpk	1	0	10	3	0	0	0	0	0	2	0	0	0	0	0	0	0	0	0	0	0	0	1	0
FBgn0022984	qkr58E-3	4832	2762	2293	2062	4598	1814	4231	3352	2385	2219	3326	4343	3687	2252	2931	3608	2135	4006	3279	1912	4509	2579	2745	1899
FBgn0022985	qkr58E-2	3919	1861	2662	2250	3896	1374	4070	2860	2834	1894	2553	2562	3999	2249	3552	3737	1972	3461	2994	2255	4263	3061	2992	1575
FBgn0022986	qkr58E-1	4850	2009	1157	1124	6066	1889	3532	2917	3454	2456	2995	5269	3612	1999	1986	2467	2560	4393	2275	1221	3839	2206	1570	1256
FBgn0022987	qkr54B	3900	1857	2468	2085	3780	1596	3527	2023	2151	1743	2327	2508	3517	1408	2737	3116	1872	3637	2975	1503	4678	2553	2354	1074
FBgn0023000	mth	231	159	265	201	170	134	325	220	91	115	217	277	163	94	216	251	101	269	415	204	280	196	358	184
FBgn0023001	melt	497	150	209	246	232	80	250	259	210	366	284	305	237	166	310	364	162	301	488	326	306	326	354	247
FBgn0023023	CRMP	8371	4265	3618	3330	8898	4100	6272	4966	4151	3629	4178	4697	6602	4413	4724	5215	3822	7525	4273	2979	6217	4973	3631	2251
FBgn0023076	Clk	1372	653	1089	873	1200	565	2191	1328	789	701	1353	1363	1651	715	1955	2186	773	1442	1484	1139	1944	1487	1256	1008
FBgn0023081	gek	3265	1216	2005	1629	3828	1399	3249	2087	1967	1616	1773	1930	2597	1325	2295	2524	1431	2728	2281	1647	3054	2422	1939	1094
FBgn0023083	fray	2246	1033	2056	1559	1719	760	2584	1517	1599	1236	1623	1360	1994	1026	2636	2698	1071	2181	2207	1521	2310	1614	2152	1193
FBgn0023090	dtr	20	7	13	4	78	1	68	82	8	14	15	14	16	14	20	12	20	30	34	8	242	151	82	39
FBgn0023091	dimm	95	37	47	48	87	73	52	21	50	22	23	26	89	46	42	40	62	74	54	18	80	24	25	17
FBgn0023094	cyc	1626	863	883	864	1853	772	1410	1192	1206	915	1138	1369	1208	838	1194	1240	817	1430	884	866	1290	1125	1053	703
FBgn0023095	caps	3027	1697	2411	1881	3360	1256	3469	1792	1815	1753	2586	2938	2785	1377	2846	2889	1724	2908	2987	1782	3243	1944	2441	1290
FBgn0023096	btv	44	11	34	30	51	2	31	27	35	19	25	23	45	15	47	65	42	24	48	18	46	23	20	4
FBgn0023097	bon	4582	2133	2428	2085	5054	2478	3774	2600	2722	1907	2202	2186	3600	1852	2679	2815	1985	3656	2646	1563	3843	2805	2109	1127
FBgn0023129	aay	5140	3453	8871	4582	5885	3800	6739	6542	2350	3137	11357	5860	3331	3127	7861	8924	3209	4118	8159	5508	3868	2159	13367	6829
FBgn0023130	a6	1098	524	413	392	1238	599	992	901	641	350	408	459	814	606	661	733	481	999	701	520	828	841	530	394
FBgn0023143	Uba1	9559	4009	6087	5394	9931	3695	9492	6579	6267	5082	4820	4946	7046	3981	7684	7733	4083	7086	6879	4999	8459	6795	6831	3783
FBgn0023167	SmD3	854	517	405	332	974	408	656	719	562	354	587	635	656	573	563	582	483	791	468	449	537	507	560	378
FBgn0023169	AMPKalpha	6934	4094	6007	5309	6767	3826	7769	7161	4557	3935	5468	4904	6174	3984	6897	7767	3157	6093	6196	5506	7008	6473	7024	4374
FBgn0023170	RpL39	2198	3279	7760	7717	3384	4906	4851	4550	1988	2204	4356	5356	2287	4669	3905	4553	2071	3580	2466	4653	2078	3141	5033	4766
FBgn0023171	rnh1	705	419	343	315	1004	665	633	762	486	301	306	389	517	439	391	433	332	587	347	269	542	419	391	222
FBgn0023172	RhoGEF2	5594	2036	4742	3901	7643	2620	5291	3556	4199	2851	3414	3433	5578	3058	4756	5149	2648	5068	3954	2724	4029	3665	3389	1956
FBgn0023174	Prosbeta2	3772	1694	1784	1497	2277	1944	2718	2276	1540	2412	1622	1805	1775	1369	2203	2249	1374	1963	2538	1517	2077	2205	2374	1340
FBgn0023175	Prosalpha7	3290	1895	1401	1269	2421	1602	2242	2120	1273	2472	1556	1778	1533	1439	1966	2012	1202	1912	2206	1264	1696	1901	2111	1269
FBgn0023177	Pp4-19C	1206	767	833	785	1828	1013	1544	1321	797	663	889	867	1004	729	1074	1081	597	1137	994	757	1180	983	1033	655
FBgn0023178	Pdf	5446	5461	1714	1814	7101	4932	5399	6498	2749	2711	2890	3262	5186	3563	2619	2700	2280	4176	1411	1142	3803	2793	1709	1273
FBgn0023179	amon	15638	8426	8075	7039	22569	10500	15185	10613	11234	7736	8383	8854	14356	8067	10180	11246	8310	15401	9798	6171	17339	12473	8552	4983
FBgn0023180	Orc6	79	37	29	21	139	1	55	70	62	43	46	64	51	48	26	38	57	79	50	33	60	33	36	27
FBgn0023181	Orc4	320	152	157	131	456	90	286	267	208	191	211	256	276	194	223	249	162	290	214	146	256	249	166	111
FBgn0023197	Jon74E	0	0	2	0	1	0	1	0	0	0	5	0	3	0	1	0	0	0	3	0	1	2	2	0
FBgn0023212	EloB	3221	2154	3320	2828	3979	1738	3947	4025	2577	1990	3064	3097	3443	2324	4136	4340	1976	3528	3236	2689	3862	3147	3899	2397
FBgn0023213	eIF4G1	8523	4216	7182	5976	8645	3650	8689	5647	4686	3986	5465	5942	6447	3380	7320	7906	4383	7428	7604	4162	8036	4616	6563	3128
FBgn0023214	edl	1213	549	447	346	952	506	714	720	383	442	636	758	454	458	799	909	481	722	603	228	422	294	621	484
FBgn0023215	Mnt	8296	3064	2959	2412	6358	1431	4937	2835	4924	3143	5068	6245	5991	2795	3775	4449	2879	4434	3151	1628	5218	3100	3114	2158
FBgn0023216	Parg	808	381	332	292	1158	362	735	644	493	298	385	438	641	385	511	520	317	459	404	270	776	522	449	295
FBgn0023388	Dap160	7572	3353	4374	3706	4997	2078	5434	2862	4972	3553	4492	4390	6965	3162	5386	5685	3489	6281	5846	3458	9259	6498	4564	2721
FBgn0023395	Chd3	5	0	3	3	2	13	6	0	7	5	2	3	57	32	18	26	54	85	46	23	3	1	4	1
FBgn0023407	B4	5520	2614	3949	3536	3976	2067	3539	1926	3268	2398	3168	3974	3818	1771	3211	3590	2425	4079	3639	1930	4893	2834	2897	1536
FBgn0023415	Acp32CD	2	0	0	0	0	0	2	0	4	0	3	0	0	0	0	0	0	0	3	1	0	2	0	0
FBgn0023416	Ac3	6265	3646	3094	2675	7970	3546	6042	3617	3666	3064	3494	4270	5794	2684	3763	4566	3296	6317	4646	2334	6854	4267	2771	1956
FBgn0023441	fus	1316	546	1750	1456	689	191	1290	740	879	875	1496	1515	1234	789	3129	3017	757	1657	1683	1280	695	657	1974	887
FBgn0023458	Rbcn-3A	10954	4832	8027	6675	11984	5010	10573	7025	6481	5142	5428	4698	9324	4515	7827	8942	4516	8942	8396	6329	10085	9247	6126	3745
FBgn0023477	Taldo	2242	2130	6033	8121	2100	1627	4221	6330	1968	2889	8299	6916	2972	2953	11759	10651	2450	3917	6983	6706	2463	2404	11087	4381
FBgn0023479	teq	3315	2001	8764	7746	1584	520	3694	2623	2167	2613	3886	2867	3125	2116	10238	10383	1240	3700	3889	4013	3046	2815	13490	4705
FBgn0023489	Pph13	1616	1102	1608	1500	1314	1115	2870	2722	1444	1298	1673	1372	2136	1459	2490	2747	1207	1876	2063	1833	2367	2156	2178	1517
FBgn0023495	Lip3	21	11	4	4	31	62	37	13	15	28	16	18	11	6	36	30	11	18	47	22	18	27	26	20
FBgn0023496	Lip1	10	6	47	44	12	7	77	51	0	8	16	33	6	1	32	44	8	15	8	6	0	1	6	8
FBgn0023506	Es2	695	455	334	292	1043	381	771	674	536	365	495	528	641	442	439	569	350	628	483	425	603	569	409	230
FBgn0023507	D2hgdh	2592	1573	4799	4023	3041	1798	4312	4421	1928	2170	3577	2845	2532	2341	9546	8885	1814	3794	4308	4715	1331	1238	5948	2026
FBgn0023508	Ocrl	4385	1981	2147	1816	4552	1973	4023	3200	2941	1994	2521	2459	3393	2031	2809	3283	1765	3294	2830	2156	3597	3060	2454	1433
FBgn0023509	mip130	1469	869	664	671	1598	840	1167	1019	1046	717	822	902	1269	910	1063	1074	679	1257	864	743	1146	1091	802	611
FBgn0023510	Rbcn-3B	6033	2505	3820	3301	6201	2663	6622	3794	3444	2477	3364	3353	5613	2510	4975	5182	3114	4554	4848	3150	6339	4414	3662	2075
FBgn0023511	Edem1	1686	1008	1986	1831	1823	742	2535	2026	2001	1683	1462	1216	1576	1091	1873	1891	885	1584	1431	1157	1663	1179	1460	870
FBgn0023512	eIF2Bepsilon	1156	688	852	769	1410	676	1342	1139	766	730	844	874	969	785	948	1061	633	1117	840	611	1034	936	1011	652
FBgn0023513	CG14803	383	215	190	159	572	161	357	213	495	459	227	241	429	264	280	346	280	455	279	213	333	332	224	130
FBgn0023514	CG14805	880	494	636	555	1138	515	814	737	605	587	678	619	867	613	934	955	529	869	722	560	889	828	865	481
FBgn0023515	Gcna	457	251	141	129	502	282	278	274	291	223	114	178	337	207	165	183	215	454	161	122	323	270	137	85
FBgn0023516	Pex5	1374	852	1343	1190	1478	863	1830	1812	1077	1062	1414	1295	1453	1138	2783	2684	715	1535	1565	1454	1424	1139	1990	1067
FBgn0023517	Pgam5	526	347	364	306	647	490	652	590	345	318	499	572	535	465	535	503	336	586	501	382	538	355	518	371
FBgn0023518	trr	2333	1033	1282	1009	2734	1184	2025	1254	1494	1005	1091	1118	1802	905	1309	1427	904	1839	1318	1027	1833	1693	1020	651
FBgn0023519	mRpL16	1227	810	554	535	1706	1192	1090	1376	820	655	803	1166	902	868	669	857	637	1098	685	621	948	855	637	486
FBgn0023520	CG3857	230	120	79	70	238	164	161	143	142	102	150	111	242	135	155	161	140	236	143	94	159	153	128	62
FBgn0023521	CG3587	290	190	184	158	368	288	290	349	197	223	259	324	244	235	210	229	204	321	170	199	258	227	230	140
FBgn0023522	CG11596	898	465	516	410	1117	378	814	748	611	445	652	920	850	470	560	641	423	909	585	416	985	712	620	381
FBgn0023523	Or2a	28	13	12	7	31	4	17	18	17	11	8	13	11	6	6	13	21	19	10	5	8	10	5	12
FBgn0023524	CG3078	5160	2241	2366	2083	4753	1961	3795	2433	4183	3701	3769	3814	3790	1835	2650	2832	2067	3429	2516	1743	5384	3863	2336	1531
FBgn0023525	CG3191	990	665	460	535	1573	727	948	958	683	718	784	1079	850	717	657	818	543	1143	619	604	647	648	660	448
FBgn0023526	CG2865	13614	6979	3979	3361	14702	4890	7959	6390	10814	9019	12615	19185	7181	4678	4137	4925	5414	8152	3961	2197	6798	4345	3439	3427
FBgn0023527	CG3071	745	433	540	455	781	536	598	549	429	446	488	430	580	510	596	629	311	682	480	466	581	424	427	241
FBgn0023528	CG2924	4296	2158	2286	1977	4397	2326	4301	2853	2429	2031	2739	2853	3587	1855	3295	3470	2163	3441	3360	2036	4150	2734	2524	1714
FBgn0023529	CG2918	6868	3543	3919	3868	7379	2949	5802	4772	5122	3477	4379	5321	5413	3643	5214	5332	3615	6266	4027	3353	5308	4548	5363	3474
FBgn0023530	CG3740	191	146	197	167	134	177	247	158	91	134	299	276	223	224	283	267	153	207	265	266	190	201	289	185
FBgn0023531	CG32809	19193	7023	5961	5312	15832	4777	9831	5635	10368	6320	6605	8199	10507	4798	5612	6819	5547	10816	6240	3424	13740	12036	4380	4091
FBgn0023534	CG17778	2246	1427	779	736	2956	1496	1826	1668	1624	1069	1330	1674	1728	1223	1104	1222	1093	1954	933	631	1771	1248	833	638
FBgn0023535	arg	136	90	205	292	106	59	70	126	52	77	208	139	53	46	88	89	59	61	274	246	61	85	223	109
FBgn0023536	CG3156	742	378	390	256	861	357	616	466	389	332	428	621	447	329	429	534	290	595	554	322	532	418	427	230
FBgn0023537	CG17896	4714	2929	4593	4734	4766	3055	5300	5592	2811	2987	4823	4640	3975	2964	6624	6340	2463	4875	5213	4622	4727	3933	8535	4360
FBgn0023540	CG3630	3137	1456	2010	1664	2216	972	2554	2247	898	1775	2177	2968	1512	1158	1656	1952	1377	1972	3073	2010	1623	1441	1931	1415
FBgn0023541	Cyp4d14	321	177	92	103	215	55	116	137	155	145	62	96	71	65	40	64	56	76	34	21	125	154	89	50
FBgn0023542	Nmd3	896	517	677	572	988	458	871	756	599	501	590	631	735	498	916	1024	480	830	713	590	860	606	955	510
FBgn0023545	PIG-K	1312	755	744	660	1603	797	1368	1352	1164	927	859	966	1100	845	1009	1077	571	1071	782	623	1331	982	969	549
FBgn0023549	Mct1	1146	489	511	384	358	163	470	304	278	762	479	401	259	197	700	633	258	331	860	294	223	376	790	297
FBgn0023550	FarO	207	90	74	67	4	0	25	40	68	27	173	205	57	24	32	28	19	49	138	109	40	6	19	14
FBgn0024150	Ac78C	1433	591	776	582	1524	465	1055	565	708	468	584	531	831	441	690	715	432	966	593	413	820	715	461	297
[truncated: 14,313 more rows]

## Sheet: Normalized expression
FlyBase ID	GeneName	Avg. Norm. Expression	73Grp_1	73Grp_2	73Iso_1	73Iso_2	370Grp_1	370Grp_2	370Iso_1	370Iso_2	563Grp_1	563Grp_2	563Iso_1	563Iso_2	360Grp_1	360Grp_2	360Iso_1	360Iso_2	317Grp_1	317Grp_2	317Iso_1	317Iso_2	707Grp_1	707Grp_2	707Iso_1	707Iso_2
FBgn0000003	7SLRNA:CR32864	1.22253	0.277385	0.382117	0	0	0.632163	2	0.292264	0.594683	0.287278	0.963456	0.302055	0.508068	0.209237	0.279918	0.234934	0.193104	0.828823	0.483864	0.095716	0.218852	0.0268265	0.594431	0.308692	19.6269
FBgn0000008	a	34.5684	38.2514	34.9637	27.8073	26.8686	44.125	35.3023	25.427	30.1097	33.1191	33.6292	23.7113	22.3283	41.2197	38.5353	35.7687	34.0414	40.7586	48.2725	38.6054	43.8141	31.1723	46.8015	25.6215	29.3879
FBgn0000014	abd-A	0.0112432	0	0	0.0774575	0	0.0252865	0	0.0243554	0	0	0	0	0	0.029891	0	0	0	0	0.0284626	0.0319053	0	0	0	0	0.0524784
FBgn0000015	Abd-B	0.0920406	0.166431	0	0.0387288	0.0422462	0.0758596	0	0.0487107	0	0.410397	0	0.241644	0.454588	0.0597821	0.186612	0.0293667	0	0.0975086	0.142313	0.0638106	0	0.0804794	0.0396287	0.0308692	0
FBgn0000017	Abl	150.48	215.75	134.314	134.505	121.585	199.334	91.2091	154.851	100.408	202.942	149.473	115.747	106.32	200.778	140.099	129.772	139.2	183.901	189.874	153.816	147.856	166.19	207.219	104.215	122.17
FBgn0000018	abo	5.13778	6.26891	4.44211	6.00296	5.66099	5.2596	4.51162	4.55445	3.69329	3.85774	4.31261	3.71527	2.88797	5.61951	5.5517	6.49005	6.70345	3.80284	7.25796	4.88151	5.07736	3.99714	5.74616	6.45167	6.5598
FBgn0000024	Ace	350.3	447.339	312.237	356.227	321.071	366.857	228.558	332.207	234.962	314.693	236.873	252.971	259.061	498.881	317.38	409.314	393.407	257.033	260.376	287.658	186.899	713.771	583.691	424.051	411.693
FBgn0000028	acj6	40.806	73.7567	50.0096	19.0546	21.5033	70.7264	42.6046	41.2824	29.5464	73.7895	48.6775	41.744	58.5616	43.6409	31.0242	21.2615	24.7448	47.9742	45.9955	30.0229	19.1276	50.0045	45.0975	17.8115	31.3821
FBgn0000032	Acph-1	9.76103	11.1231	11.8456	9.44982	10.3081	10.5951	5.30232	11.6175	9.64013	10.1368	8.62523	7.09829	5.56201	9.77437	9.23728	10.2196	9.87587	9.50709	9.19342	11.7093	9.10423	11.8573	12.3245	10.7116	9.44612
FBgn0000036	nAChRalpha1	292.348	516.103	347.249	157.316	150.565	595.776	298.465	293.239	272.647	441.547	332.438	262.546	325.645	364.192	319.946	155.556	180.662	369.509	369.245	199.663	140.984	315.425	283.543	123.199	200.887
FBgn0000037	mAChR-A	127.823	202.131	129.06	96.7057	94.9694	212.786	124.465	132.932	105.728	175.322	120.983	101.672	103.111	173.577	123.35	93.9442	96.9104	157.964	157.91	105.224	80.7563	162.112	169.175	71.4931	75.464
FBgn0000038	nAChRbeta1	747.89	1270.29	807.843	389.96	386.637	1475.9	960.091	991.069	864.826	1014.95	754.065	688.625	909.496	930.269	672.222	468.869	541.545	889.864	861.733	593.535	365.132	741	648.92	296.283	426.23
FBgn0000039	nAChRalpha2	90.6056	122.521	108.521	56.1567	55.8072	147.774	163.535	98.2496	105.102	109.945	93.9599	71.2547	77.0392	94.904	88.2673	67.0443	69.0483	109.843	98.3667	75.488	75.0662	78.0918	94.2371	51.3355	62.9741
FBgn0000042	Act5C	1161.85	1244.07	1188.38	1047.69	989.406	1212.24	1060.37	1087.91	1197.91	1271.9	1317.55	983.823	1032.13	1125.82	1229.82	1024.9	1095.59	1148.41	1198.45	1378.88	1207.54	1277.99	1508.51	992.322	1062.85
FBgn0000043	Act42A	35.097	39.0836	34.1517	24.7864	23.1509	39.8263	38.372	28.5932	29.5464	33.3653	43.7226	34.9175	32.1688	36.198	45.5333	27.9865	28.7724	35.3469	42.0392	43.9336	44.4707	33.1307	41.5309	31.0544	30.6474
FBgn0000044	Act57B	630.898	570.304	505.78	741.307	710.074	474.072	566.65	368.302	295.338	515.911	565.732	660.171	538.686	302.707	374.716	335.074	334.124	609.039	423.21	1757.54	1701.09	515.578	969.2	658.842	648.109
FBgn0000045	Act79B	146.841	89.956	160.824	157.936	107.728	94.6222	42.9767	153.341	112.865	146.553	88.3168	130.941	257.216	102.795	62.1883	84.8111	159.393	84.3937	123.158	247.617	609.327	113.556	104.382	141.505	147.779
FBgn0000046	Act87E	136.585	154.836	110.145	165.101	133.202	110.199	106.186	96.4473	85.0397	94.3093	196.224	150.212	175.337	83.9041	83.9286	84.3119	117.379	100.19	89.8564	295.89	319.349	112.054	152.491	133.664	127.785
FBgn0000047	Act88F	12.1191	0.804417	2.77035	2.86593	1.18289	14.4892	7.81394	11.1548	9.51493	14.9385	9.1299	11.4177	13.0493	1.31521	1.91277	3.67084	5.21379	4.19287	3.98476	9.76303	25.3868	25.8607	71.2524	16.0829	23.0905
FBgn0000052	Pfas	89.1247	49.8739	40.9821	182.258	105.235	46.0973	33.9069	41.1606	51.5809	75.2259	104.466	175.343	60.781	37.6926	66.3871	181.751	168.138	53.8248	61.593	85.0596	109.207	31.6552	35.7847	246.738	94.2513
FBgn0000053	Gart	99.7168	41.691	36.8743	274.548	122.472	29.3071	31.5813	64.7366	111.675	42.7224	89.9685	166.885	69.0706	30.459	55.8436	259.719	234.786	41.0024	47.4756	106.628	142.122	16.7129	23.5395	273.563	79.8197
FBgn0000055	Adh	6.96879	6.79594	6.2094	8.59779	11.6599	2.27579	2.8372	5.72351	6.29112	1.23119	2.3857	2.7487	3.23559	5.3206	5.73831	15.7112	16.8552	6.58183	13.2636	13.0174	10.7675	2.65582	3.24955	6.69862	7.39946
FBgn0000057	adp	43.0161	45.7131	43.3225	37.1796	33.121	57.5521	38.372	46.5918	47.0739	42.7224	37.3913	39.388	34.5219	42.4752	50.2919	43.1397	42.1517	43.7814	43.9462	37.9992	45.6525	39.6763	51.5966	42.2291	46.4959
FBgn0000061	al	0.340757	0.249647	0.382117	0.426016	0.295723	0.202292	0	0.292264	0.375589	0.533517	0.504668	0.392671	0.454588	0.29891	0.32657	0.234934	0.386207	0.0975086	0.370014	0.574296	0.525244	0.160959	0.356658	0.370431	0.367349
FBgn0000063	Mps1	2.70888	4.57686	3.77341	2.43991	1.81659	3.46425	2.23255	1.38826	0.907674	4.06293	4.35849	1.72171	1.97879	2.21194	3.03244	1.38024	1.46207	3.12028	3.64321	2.20147	1.96967	3.43379	4.75545	2.03737	3.04375
FBgn0000064	Ald1	1251.43	984.662	993.552	1740.2	1739.28	871.778	818.557	1208.54	1102.51	838.688	926.524	1244.25	1132.35	1022.87	1005.84	1462.46	1492.86	1291.11	1231.41	1853.09	2018.69	1037.27	1039.7	1613.5	1364.65
FBgn0000071	Ama	2.85502	6.35212	5.5407	4.68618	4.3936	3.28725	2.46511	2.48425	2.50393	1.80575	1.28461	2.53726	0.481328	1.40488	3.87219	1.26277	1.84828	4.92419	5.7779	3.73292	1.53196	1.77055	1.14923	2.0065	1.41692
FBgn0000075	amd	7.38325	7.37845	6.97364	5.3833	4.68933	5.15845	9.2558	5.52867	5.72774	13.1738	14.7271	9.93761	7.11296	4.18475	3.87219	5.72651	4	9.94588	3.7286	12.4112	7.9662	5.87499	9.39201	6.38993	8.65894
FBgn0000077	amx	13.5398	13.7028	17.6251	13.4389	13.2231	11.8088	11.5349	12.3969	14.8045	12.435	14.6354	13.23	14.2527	13.3314	16.0953	12.3634	13.6552	13.5049	13.9182	11.5497	12.8685	14.1375	16.5252	12.1625	11.7552
FBgn0000078	Amy-d	50.8939	1.05406	1.00306	26.6454	4.9428	12.0364	6.55813	38.0187	69.9535	107.976	129.883	46.4258	14.1457	20.1466	50.7117	124.721	165.352	2.38896	7.05872	6.63631	22.5855	6.14326	11.532	255.535	90.0005
FBgn0000079	Amy-p	54.4944	2.6629	1.57623	67.2331	8.19576	9.2043	7.72092	41.8425	81.8785	159.398	177.781	105.357	31.0991	11.5977	42.7341	70.7151	94.4	14.7238	18.6999	18.1222	92.0928	5.5799	8.79758	166.972	69.4814
FBgn0000083	AnxB9	186.039	169.566	182.891	216.416	199.529	136.396	127.302	136.609	159.594	163.954	189.572	209.233	197.746	160.067	221.182	199.43	172.579	177.076	197.986	196.282	236.491	148.055	192.16	231.365	243.447
FBgn0000084	AnxB10	236.957	237.996	291.078	148.099	164.971	250.539	342.046	198.545	291.457	227.565	229.348	213.583	188.493	236.348	312.948	205.303	206.345	272.683	232.454	194.878	274.79	179.898	273.557	217.288	296.766
FBgn0000092	dyw	10.9568	22.1908	10.4605	6.42897	3.2952	4.24814	4.32557	4.7493	1.75275	8.53627	110.66	6.0713	3.47626	3.31791	5.27178	4.58121	3.97242	4.04661	4.184	33.022	4.33327	1.79737	8.40129	1.63607	2.20409
FBgn0000094	Anp	0.01024	0	0	0	0	0.0252865	0	0.0730661	0.0625982	0.0410397	0	0	0	0	0	0	0	0	0	0	0.0437704	0	0	0	0
FBgn0000097	aop	39.8754	47.4051	29.9007	38.69	34.2617	37.2723	25.1627	38.5546	23.2552	43.379	40.924	35.8539	33.5325	36.8556	25.1459	42.6992	39.8621	35.8344	36.6313	52.1014	34.1846	58.1866	60.2357	52.8172	54.2627
FBgn0000100	RpLP0	974.76	714.322	846.437	1227.16	1254.58	860.248	912.696	629.391	970.022	856.951	911.109	824.308	822.456	750.833	1326.25	1121.52	1138.73	812.734	1027.41	811.512	1180.22	677.502	997.732	1368.37	1351.74
FBgn0000108	Appl	1682.89	2092.7	2284.06	1295.86	1240.56	2232.93	1973.11	1441.64	1290.59	1964.53	1831.39	1451.89	2070.67	1987.78	1676.33	1195.9	1311.53	1971.87	2023.63	1407.85	1122.62	2129.08	1864.21	1092.8	1435.91
FBgn0000109	Aprt	8.68337	9.62527	9.98281	11.9285	13.899	6.1952	6.55813	8.1834	8.63855	5.41725	6.83595	9.51473	8.74413	5.52984	8.35087	9.16242	8.13793	8.38574	8.31107	9.66731	13.7001	4.77511	6.49911	11.1747	9.18373
FBgn0000114	bru1	115.567	135.003	100.306	85.0871	84.7036	187.373	111.953	129.424	122.88	140.766	137.866	145.228	145.254	93.0209	85.0949	85.2516	88.7173	121.837	107.702	141.022	111.658	111.732	100.736	89.9529	111.044
FBgn0000115	Arl1	25.5336	26.8231	27.0348	21.5332	20.9119	24.5279	41.3953	23.5029	29.9532	22.4487	25.1875	23.8623	28.3181	22.2688	30.7443	22.4949	24.2207	25.1085	27.4664	24.8861	26.5686	19.0468	26.5909	21.5158	26.3967
FBgn0000116	Argk1	2653.53	2402.52	2571.17	2793.7	2680.82	2023.83	2357.62	2768.94	3723.28	2142.52	2141.86	2796.76	3054.88	2464.58	2508.2	2698.86	2886.98	2096.63	2215.73	3043.03	4314.49	2058.45	2547.22	2270.43	3122.26
FBgn0000117	arm	450.012	531.997	438.145	457.348	409.703	492.177	342.93	459.391	481.599	459.194	431.766	392.913	355.915	462.325	463.357	437.418	466.704	376.725	456.938	489.842	509.399	466.539	571.05	418.803	428.119
FBgn0000119	arr	34.682	39.3887	29.1364	39.8906	36.9232	36.2103	25.3488	34.1219	28.2005	36.3612	31.5188	26.7923	22.7294	40.8909	29.7646	39.234	41.4897	38.2234	38.0829	40.424	35.2789	38.7642	43.116	30.4062	30.0701
FBgn0000120	Arr1	12920.9	10303.8	14479.7	11249.8	12154.6	5366.91	12197.5	14845	23985.6	9895.54	13940.1	9790.63	8632.14	18093.4	19167.5	13709.5	15004.1	7808.15	11371.6	8358.24	12109.2	13625	17030.1	11727	15257.5
FBgn0000121	Arr2	14279.3	12897.6	14931.7	14981.2	15102.5	8607.86	15811.3	16190.5	22279.7	12060.2	12077.5	8592.31	6322.86	17116.5	17237.1	17806.8	18402	9573.59	11339.6	11971.5	16557.2	14870.6	21555.2	11893.4	14525
FBgn0000137	ase	0.0143344	0	0.0955293	0	0	0	0	0	0	0	0	0	0	0.0597821	0.139959	0	0	0.0487543	0	0	0	0	0	0	0
FBgn0000139	ash2	24.3689	28.9868	31.1425	27.6911	25.7279	36.2356	32.6511	22.48	26.792	28.933	24.5452	22.7447	18.4776	21.671	24.6327	20.0281	18.869	23.012	22.4001	19.9727	23.7235	18.3761	20.7258	22.1024	22.9331
FBgn0000140	asp	0.384292	0.970848	1.14635	0.697118	0.337969	1.08732	0	0.146132	0.34429	0.328318	0.229394	0.060411	0.0802213	0.209237	0.279918	0.0587335	0.0827587	0.731315	0.540789	0.382864	0.437704	0.187785	0.435916	0.185215	0.262392
FBgn0000146	aub	1.39092	2.13587	1.71953	1.51042	1.01391	3.16082	3.34883	2.11892	2.84822	1.14911	0.82582	0.996781	1.60443	0.777167	0.746447	0.557968	0.524138	1.41388	1.22389	0.606201	0.218852	1.18036	1.26812	1.17303	1.25948
FBgn0000147	aurA	1.84259	1.16502	1.33741	1.23932	0.844924	4.55157	2.13953	1.5831	1.34586	1.47743	3.16564	1.38945	0.641771	3.58692	4.8519	0.939736	1.04828	3.51031	3.41551	0.861444	0.744096	1.28767	1.54552	0.709992	0.839655
FBgn0000150	awd	444.669	314.638	381.639	364.399	411.224	298.229	640.045	384.985	651.366	342.887	336.522	500.475	446.111	405.352	639.518	503.904	461.793	422.944	359.198	426.574	627.01	276.661	369.538	523.48	583.56
FBgn0000152	Axs	17.8163	21.1922	19.0103	18.1251	15.0396	19.9764	19.0232	11.9585	12.8326	20.1095	20.0491	14.8913	21.633	18.1738	20.294	13.4793	11.9448	22.817	24.2786	24.5033	20.8347	11.6159	17.1196	13.8912	14.7989
FBgn0000153	b	22.3981	21.7193	17.1475	20.4875	22.137	11.5812	19.6744	18.5101	21.8781	16.3338	53.2195	18.2743	19.7879	17.546	16.2352	25.2554	24.5517	20.7206	16.8499	34.3939	36.7671	15.1033	20.8843	23.3063	25.1896
FBgn0000157	Dll	16.9391	19.8608	14.5204	16.5759	13.5188	19.243	9.99998	12.3238	15.0862	19.8632	17.2046	15.6464	16.7128	17.9047	18.7078	16.6803	17.4069	23.5971	22.2293	17.2289	15.8449	15.8276	18.8633	13.9529	17.7377
FBgn0000158	bam	0.0723283	0.055477	0.0955293	0.0387288	0	0	0	0.0974215	0.0938973	0	0.0917577	0.120822	0.320885	0.0597821	0	0	0	0	0.0853878	0	0.0875407	0.0268265	0	0.246954	0.314871
FBgn0000163	baz	47.0771	44.6035	31.9068	63.7475	57.9195	38.0056	29.5813	50.6835	37.3711	44.364	36.2443	47.8455	35.2706	45.1056	40.1215	59.82	55.5586	48.5593	49.8949	56.5681	55.3695	45.0953	45.3749	54.7929	56.047
FBgn0000166	bcd	0.0223483	0	0	0.0387288	0	0.177006	0	0	0	0.0410397	0	0	0	0	0	0	0	0	0.0284626	0	0	0	0.158515	0.0926077	0
FBgn0000173	ben	299.298	281.463	348.539	248.561	256.984	313.376	341.302	363.358	337.279	226.088	284.174	335.825	383.057	346.885	304.224	264.418	274.841	301.887	306.884	288.233	231.02	335.492	261.629	249.763	297.868
FBgn0000179	bi	55.5046	91.6203	49.4364	35.127	35.1066	95.1279	47.4883	67.3913	42.066	88.2765	50.1915	53.6751	49.6303	73.5618	55.8902	39.5276	47.8069	70.3037	64.4962	47.1561	43.3327	59.823	57.1446	28.1527	39.7787
FBgn0000180	bib	14.8479	17.8359	16.431	11.425	11.5332	13.9582	3.39534	17.1949	15.7435	16.9905	14.5436	10.0584	7.94191	16.2009	16.7017	14.7127	12.9379	20.0868	19.81	16.1441	15.6698	20.2808	18.8236	14.0764	13.8543
FBgn0000181	bic	464.066	369.838	393.867	455.566	408.943	403.472	374.046	353.518	484.792	395.5	351.249	444.504	468.519	393.217	579.756	556.735	550.042	428.404	472.564	437.422	537.981	408.433	472.295	664.059	732.861
FBgn0000182	BicC	0	0	0	0	0	0	0	0	0	0	0	0	0	0	0	0	0	0	0	0	0	0	0	0	0
FBgn0000183	BicD	109.862	120.246	127.054	136.945	123.19	111.008	119.07	129.01	95.8379	92.7909	95.6116	88.7437	80.0342	116.396	90.2734	103.958	115.807	112.866	112.029	113.232	98.7459	143.226	132.083	92.1446	86.3795
FBgn0000206	boss	215.79	130.288	97.4398	250.227	236.959	78.7422	112.977	280.744	252.584	169.043	176.083	241.493	173.439	180.363	153.162	353.722	325.628	172.151	120.539	384.044	388.725	180.596	181.856	277.823	260.346
FBgn0000212	brm	116.114	149.344	125.764	89.6571	90.1111	167.726	133.488	97.0074	104.821	156.402	127.589	85.6628	87.0401	138.665	130.721	97.5563	90.8138	139.681	134.656	98.1089	108.288	117.795	154.037	74.364	87.4291
FBgn0000216	Brd	0.00118594	0	0	0	0	0	0	0	0	0	0	0	0	0	0	0	0	0	0.0284626	0	0	0	0	0	0
FBgn0000221	brn	8.25991	7.43392	10.0306	7.47465	8.44924	8.87557	15.4883	8.08598	10.7356	9.64434	11.6532	6.01089	5.29461	8.75807	10.9634	7.16548	8.19311	6.38682	8.5957	6.5725	8.18506	5.39212	7.09354	4.72299	7.03211
FBgn0000227	Elba1	0	0	0	0	0	0	0	0	0	0	0	0	0	0	0	0	0	0	0	0	0	0	0	0	0
FBgn0000228	Nin	64.5127	80.9687	65.342	71.9193	66.1998	90.9556	56.1394	58.9156	52.8955	81.2997	65.5609	43.1032	45.9668	78.5835	61.6285	59.7319	57.3517	65.1845	77.2475	58.6101	63.1169	63.1763	83.7355	47.3534	53.3181
FBgn0000229	bsk	144.068	168.955	166.937	123.041	115.628	173.592	187.721	165.129	198.968	138.632	132.177	119.704	131.964	152.982	137.766	142.135	144.331	130.32	130.757	145.233	103.386	162.085	147.855	120.822	117.499
FBgn0000233	btd	1.45144	1.88622	1.57623	1.04568	0.802677	1.36547	2.55814	1.33955	0.625982	1.84679	1.78928	0.996781	1.17658	1.85324	1.44624	1.3215	1.24138	1.7064	2.04931	1.53146	1.57573	1.4218	1.82292	1.17303	0.68222
FBgn0000239	bur	69.943	78.6942	61.4253	90.1993	81.6196	69.1839	45.8139	64.0059	65.6968	70.8346	69.1395	59.5652	54.4703	68.2412	67.9733	93.0338	86.2069	61.1867	74.6858	74.467	68.8945	64.4908	65.9818	78.377	64.4435
FBgn0000241	bw	24.7778	20.3601	19.2969	31.6414	34.7264	6.80208	11.5349	22.6505	21.972	29.5486	26.3345	31.4439	28.8262	19.0406	11.6632	25.3141	21.0483	19.4042	18.3868	35.9892	41.1004	28.6238	27.2646	32.9375	28.7582
FBgn0000244	by	72.534	62.7168	58.6072	99.1844	96.1101	68.6276	73.0696	76.1592	73.2086	57.7019	57.4862	64.0054	53.4809	61.0674	57.0565	91.6536	85.9587	64.502	68.2533	70.1917	86.0087	55.8258	68.7558	102.023	89.1609
FBgn0000246	c(3)G	6.97585	8.29382	7.0214	6.62262	6.46367	11.0249	9.58138	6.69773	8.35686	10.2599	6.05601	5.89007	5.93638	8.42927	6.85798	5.72651	5.48966	8.72702	8.16876	5.392	3.72048	8.74542	6.14245	3.82778	3.98836
FBgn0000247	ca	74.7369	97.3345	64.339	79.3552	72.9169	90.02	48.5581	73.0418	56.7453	98.3312	82.9031	63.7336	62.7063	93.4693	71.9388	71.9191	76.4966	77.7631	92.1049	72.5527	68.1067	75.6774	93.4841	55.3485	54.84
FBgn0000250	cact	155.651	169.177	157.91	146.279	127.879	173.187	144.744	137.827	152.301	167.812	152.593	140.516	156.646	147.811	158.993	144.367	148.552	183.17	173.992	157.995	169.304	138.103	156.969	150.858	178.637
FBgn0000251	cad	0.0855845	0.0832156	0.0477646	0.271101	0.168985	0.0252865	0	0.340975	0.0312991	0.246238	0	0.241644	0	0.0597821	0.0466529	0.0293667	0.0827587	0	0.11385	0.0319053	0.0437704	0.0268265	0.0792574	0.0308692	0.0524784
FBgn0000253	Cam	6443.68	7634.53	6766.67	4714.37	4809.98	7928.34	7073.06	7605.74	8001.12	6432.69	6331.88	6865.44	8339.22	6593.19	5197.18	5773.21	6070.18	6966.26	5549.04	7658.04	5033.77	7022.76	4938.53	4876.13	6466.92
FBgn0000256	capu	133.896	190.369	143.963	91.2837	91.3362	178.725	129.767	127.598	128.984	230.233	172	148.43	150.87	132.118	121.624	80.6117	94.7587	172.542	165.111	119.007	112.271	116.856	139.77	71.524	103.75
FBgn0000257	car	44.2178	56.226	48.911	40.3166	37.5569	59.1705	64.6045	49.4901	47.8876	49.0425	42.7591	30.9002	27.2753	44.2387	41.4278	36.356	39.8345	42.7088	45.7394	40.2007	40.8377	46.6244	55.6783	32.3509	41.0906
FBgn0000259	CkIIbeta	131.997	176.029	141.288	113.088	108.446	179.812	145.767	135.075	120.22	171.628	131.076	123.933	130.36	144.942	115.559	112.034	114.924	143.094	134.685	133.843	87.8909	159.456	137.71	101.22	105.849
FBgn0000261	Cat	215.063	131.175	157.91	246.547	236.114	101.525	140.558	129.717	157.685	214.351	180.717	396.326	392.282	150.173	183.159	331.345	309.269	124.47	144.135	304.345	273.346	94.9656	156.533	317.706	287.162
FBgn0000273	Pka-C1	439.276	513.468	319.307	390.154	337.927	517.16	382.185	414.455	317.905	742.737	549.767	597.404	703.006	416.89	287.849	310.612	317.104	695.529	606.367	529.373	322.237	428.499	318.139	266.247	258.299
FBgn0000274	Pka-C2	0.045079	0.0277385	0	0	0	0	0	0.0243554	0.0938973	0.328318	0.275273	0.0302055	0	0	0.0466529	0.0587335	0	0	0	0.0638106	0	0.0536529	0.0792574	0	0
FBgn0000276	CecA1	2.11878	0.138693	1.05082	7.08736	0.0422462	2.35165	2.55814	2.33812	1.65885	0.697676	0.137637	5.37658	4.11803	0.538039	1.81946	0.675435	0.717242	1.75516	1.96392	2.36099	11.1177	1.4218	0.31703	0.555646	0.0524784
FBgn0000277	CecA2	1.68453	0.0832156	0.811999	6.66135	0.211231	1.13789	0	1.63181	0.68858	0.410397	0.458789	2.50706	2.35316	0.388583	2.00608	1.52707	0.689655	1.07259	2.10623	2.55243	10.1547	1.87785	0.31703	0.308692	0.472306
FBgn0000278	CecB	0.369009	0.110954	0.334352	1.66534	0.0844924	0.0758596	0	0.0243554	0	0.287278	0.229394	0.966576	0.374366	0.149455	0.32657	0.117467	0.0551724	0.0975086	0.284626	1.27621	1.05049	1.04623	0.237772	0.0617384	0
FBgn0000279	CecC	1.61117	0.360601	1.14635	11.0764	0.168985	0.278152	0	0.389686	0	1.27223	2.33982	1.26863	0.0802213	0.777167	2.98579	0.646068	0.303448	0.68256	1.42313	3.15863	4.37704	4.02397	1.1096	0.432169	0.367349
FBgn0000281	Cec2	0.0445676	0	0	0	0	0	0	0.146132	0.0625982	0	0	0	0	0	0	0	0	0	0.0284626	0.0638106	0.131311	0.134132	0	0.0308692	0.472306
FBgn0000283	Cp190	99.8881	133.755	96.389	89.7345	86.0555	166.411	100.046	88.9458	82.3793	144.542	103.916	68.053	62.4924	121.238	103.15	84.2825	84.8	110.867	119.002	79.6676	75.4601	113.959	140.959	67.6345	73.5748
FBgn0000286	Cf2	81.423	87.6815	89.4632	69.9441	74.2265	69.5127	66.5115	67.0747	67.8878	65.8688	81.2974	66.7239	92.2011	115.021	114.673	80.6998	85.2414	123.787	134.059	78.6785	61.6724	74.7653	72.362	54.0829	60.7175
FBgn0000287	salr	45.647	66.0454	42.4628	39.8906	39.9649	68.8552	34.6511	50.0503	44.1004	76.8264	47.9893	36.156	29.361	45.9724	41.9876	38.1474	41.4897	46.0241	51.9442	37.6483	41.6694	45.6318	54.2913	33.8018	40.5658
FBgn0000289	cg	218.075	305.151	224.637	184.465	170.125	336.892	212.186	213.377	196.871	293.968	221.503	160.995	166.085	264.446	229.206	174.321	185.6	268.929	264.047	196.888	168.122	231.512	273.874	133.571	157.015
FBgn0000299	Col4a1	208.728	127.264	101.5	172.459	144.778	54.2143	65.3487	128.864	85.0084	307.141	277.108	231.163	196.649	176.955	188.524	277.486	268.028	187.85	171.829	381.205	478.279	150.47	174.327	337.802	325.209
FBgn0000303	ChAT	217.745	304.624	258.072	148.641	150.65	340.331	302.883	241.386	224.008	222.517	185.626	169.906	186.916	256.106	241.849	156.025	174.897	261.908	223.972	196.058	163.964	246.991	265.948	129.743	172.864
FBgn0000307	chif	78.9188	111.564	65.5808	81.2917	78.0287	107.392	67.0231	87.8255	66.2602	105.144	78.5446	58.5986	48.1061	90.6595	62.375	73.2113	76.8552	82.3948	81.2038	78.9657	72.7026	90.888	112.03	58.1576	59.2482
FBgn0000308	chic	466.971	469.613	452.331	287.522	304.764	656.16	490.743	453.18	530.113	534.707	446.08	447.615	560.774	483.577	537.535	376.511	404.359	544.293	533.36	382.928	324.688	524.216	471.423	448.715	542.102
FBgn0000316	cin	27.6325	35.4221	28.4677	30.8281	28.0515	38.739	22.6976	29.9571	27.1676	26.5117	22.9394	21.4459	20.7506	28.815	28.5049	29.4842	25.7931	27.8387	29.3734	26.2262	25.343	30.1798	29.4441	26.4241	22.7756
FBgn0000317	ck	18.8606	16.0606	11.1292	33.8489	30.5017	9.45716	7.58138	16.0745	13.2082	14.3229	13.7637	17.8514	14.7072	15.3341	11.4766	31.8629	26.4828	16.3327	18.5007	29.6719	27.3565	15.2374	15.6533	25.4054	20.8339
FBgn0000318	cl	105.938	78.0839	110.289	75.5598	75.7896	88.2753	163.302	93.2567	162.912	94.8839	97.4926	110.039	123.594	99.9855	158.34	101.668	106.317	108.381	104.429	107.298	139.759	69.3196	88.6891	83.8717	100.969
FBgn0000319	Chc	338.049	382.348	306.601	443.367	399.691	324.477	278.325	357.172	323.789	302.914	292.111	270.581	253.366	322.584	308.469	379.741	389.462	272.585	313.999	416.715	417.569	335.331	379.445	332.029	310.515
FBgn0000320	eya	44.8989	44.8532	39.8835	53.7943	55.5115	25.2865	25.7674	46.4944	44.0065	34.104	36.6572	53.5845	39.1213	38.3502	23.8863	45.9002	50.0138	39.6373	33.1874	67.1288	73.7968	51.7751	46.4449	48.2486	60.1403
FBgn0000326	clt	24.8611	25.464	27.4647	25.4448	28.0515	24.6797	37.7674	25.841	29.9219	24.747	20.5079	19.2107	17.2208	23.4944	26.4522	27.1055	27.2276	21.6957	21.6316	25.0138	24.0299	18.9663	22.7469	25.3745	26.6066
FBgn0000330	cm	27.6939	26.8231	30.856	30.5183	26.1504	28.0175	34.093	28.6906	31.4243	21.4227	23.5359	22.7749	22.462	27.8883	31.9573	28.5738	27.1173	24.5234	28.8611	27.3429	32.6089	22.6147	31.3067	26.3314	28.7582
FBgn0000337	cn	0.67451	0.499293	0.143294	1.23932	2.07006	0.303438	0	0.730661	0.563384	0.246238	0.0917577	0.755137	0.58829	0.418475	0.373223	0.939736	0.8	0.68256	0.398476	1.49955	1.26934	0.295091	0.515173	0.926077	0.839655
FBgn0000339	cni	25.6805	19.6666	23.6435	30.6732	27.291	17.9534	27.1627	29.6648	29.4838	17.8523	22.0677	23.3488	22.6224	23.7933	30.1844	31.3637	33.3793	21.1594	24.7055	27.4067	23.3296	24.1975	25.6002	32.0731	27.7086
FBgn0000346	comt	567.824	825.138	684.993	530.274	490.732	661.951	488.836	673.986	658.471	543.654	572.66	477.096	411.803	577.286	457.945	510.13	544.855	469.65	466.957	607.19	560.173	696.844	710.701	492.272	514.184
FBgn0000351	cort	1.11819	1.88622	1.09859	0.890762	0.675939	2.02292	0	0.925504	1.15807	1.51847	0.82582	0.845754	0.320885	1.16575	2.23934	0.411134	0.689655	0.877578	1.33774	0.606201	0.350163	1.74372	3.28918	0.8026	1.15453
FBgn0000352	cos	60.7698	75.3656	62.1895	50.0376	47.358	73.5332	51.2092	58.3798	52.0504	67.7977	66.1115	47.332	41.3942	80.4966	66.4804	57.7937	64.2207	64.2094	77.1051	63.0449	62.4603	69.2122	76.9193	42.1056	41.6679
FBgn0000355	Cp15	0.00534908	0	0	0	0	0	0	0	0	0	0	0	0	0	0	0	0	0.0975086	0	0	0	0	0	0.0308692	0
FBgn0000357	Cp18	4.4254	7.37845	5.30187	1.82025	2.28129	11.0755	13.4418	4.23783	5.91553	7.63339	4.1291	2.205	3.10189	5.20104	7.2312	1.9382	2.62069	4.68041	4.75325	1.69098	2.18852	2.57534	3.05141	0.339561	1.41692
FBgn0000358	Cp19	0.279868	0.138693	0	0.154915	0.0844924	0.0758596	0.790696	0.0243554	0	0	0.0917577	0.151027	0.401107	0.119564	0.0466529	0.117467	0.137931	0.438789	0.569252	1.2124	1.22557	0.321917	0.237772	0.0617384	0.314871
FBgn0000359	Cp36	0.0198382	0	0	0.0774575	0	0.278152	0	0	0	0	0	0.0906165	0	0.029891	0	0	0	0	0	0	0	0	0	0	0
FBgn0000360	Cp38	0.0145049	0	0	0	0	0.0505731	0	0.0243554	0	0	0.183515	0	0	0.0896731	0	0	0	0	0	0	0	0	0	0	0
FBgn0000370	crc	146.916	66.406	61.5686	253.751	224.031	82.6869	54.6976	180.035	105.102	105.185	86.1146	116.201	74.2582	102.407	112.527	310.994	310.814	94.2421	109.78	189.39	193.421	117.607	122.651	262.512	189.605
FBgn0000376	crm	26.9894	37.3083	25.5541	25.9095	24.9675	35.3	29.2093	25.8167	24.069	32.5445	27.8485	20.5699	17.515	28.9644	26.4522	24.7562	22.869	28.6188	29.5442	23.8971	26.2622	27.4971	41.2535	21.3924	19.6269
FBgn0000377	crn	40.3278	44.0488	50.2962	36.4825	35.1911	50.3708	68.279	39.3826	46.9487	45.1437	37.8501	31.2023	29.2273	38.6192	43.3872	34.0067	30.5931	49.6806	40.1892	32.2244	33.1779	36.7522	42.3235	36.8579	35.6329
FBgn0000382	csw	413.76	629.498	454.48	418.232	404.972	577.595	407.348	383.792	355.683	632.546	463.744	395.692	451.138	433.36	338.607	286.59	299.09	464.58	406.474	354.851	251.767	480.301	415.785	285.263	338.853
FBgn0000384	cta	24.6643	18.3906	31.2858	26.2581	22.8974	23.7693	27.8604	29.0803	24.9454	18.8783	26.4262	20.2075	22.9166	27.5296	22.6267	23.3759	25.131	33.4942	30.028	29.0657	17.5957	30.2334	23.2224	18.3054	18.4199
FBgn0000394	cv	28.1939	25.0756	21.5896	37.2958	35.1066	18.004	17.3953	20.6046	22.7545	26.7579	24.8205	31.5043	28.6123	25.5568	25.4725	37.2664	34.1793	28.765	28.8041	39.8497	37.161	19.9052	23.0243	35.87	31.2771
FBgn0000395	cv-2	26.7406	28.2655	20.3	23.2373	21.1231	24.4015	19.4418	18.1935	13.2082	26.5938	25.1875	29.1483	17.0337	26.0949	28.6915	21.3203	23.1724	40.9049	38.9937	38.7969	33.2217	21.4612	27.1457	29.6036	46.2335
FBgn0000404	CycA	1.36611	1.27597	0.764234	3.05957	1.90108	1.92178	0.558139	0.99857	0.845076	1.43639	1.42225	1.0874	0.721992	1.07608	0.979711	1.52707	1.6	1.80391	1.50852	1.46764	1.83835	1.66324	1.54552	1.04955	0.734698
FBgn0000405	CycB	0.964847	0.221908	0.0955293	3.95033	1.52086	0.606877	0	0.901149	0.907674	1.19015	0.734062	0.634315	0.989396	0.86684	1.21298	1.4096	1.32414	0.633806	0.142313	0.638106	0.262622	1.26084	1.38701	1.11129	1.15453
FBgn0000406	Cyt-b5-r	259.162	61.8846	77.8563	468.269	379.033	41.4952	22.7441	94.5232	172.489	211.642	367.352	326.098	188.814	71.8282	192.303	723.361	718.759	91.9019	152.986	248	391.219	22.8025	37.251	749.999	407.285
FBgn0000411	D	32.6075	44.2152	32.6232	20.0615	20.3627	44.0491	40.9767	32.2709	32.8641	43.0097	32.4364	30.6586	30.4841	35.6002	35.7361	26.2832	26.7586	32.4704	38.2253	29.2253	28.3632	36.6181	40.6591	21.9171	26.7115
FBgn0000412	D1	257.777	306.095	344.144	138.029	144.778	404.964	331.209	220.806	304.29	317.442	275.824	191.322	237.642	274.669	343.645	167.655	173.241	332.114	280.385	158.41	182.216	283.234	340.45	177.93	256.147
FBgn0000414	Dab	202.03	286.65	177.111	214.015	202.739	199.106	150.325	161.208	110.799	296.594	212.649	159.727	136.911	242.386	195.149	178.755	198.51	230.705	255.566	198.068	199.243	220.567	297.849	155.365	168.718
FBgn0000416	Sap-r	590.248	592.606	494.077	1004.59	890.043	355.023	405.209	500.893	508.485	602.956	780.079	462.325	327.597	467.795	472.547	849.815	790.235	400.273	431.834	682.519	675.114	411.357	548.144	870.636	641.811
FBgn0000422	Ddc	516.253	312.169	254.92	132.143	127.752	991.485	693.534	504.96	530.113	573.489	529.167	361.59	414.958	855.123	840.079	451.572	510.345	776.705	858.859	436.56	442.781	501.521	657.995	252.634	379.629
FBgn0000426	SmF	6.47012	5.85283	8.16775	4.37635	4.35136	7.45953	11.2093	4.84672	4.72617	8.12587	7.75353	4.59123	5.69571	5.91843	11.6632	5.10981	5.32414	8.4345	8.22569	2.96719	5.29621	5.5799	6.65762	4.8156	8.13416
FBgn0000427	dec	0.0144305	0.055477	0	0.0774575	0	0	0	0	0	0	0	0	0	0.029891	0.0933059	0	0	0	0.0284626	0	0	0	0	0.0617384	0
FBgn0000439	Dfd	22.7862	22.5237	19.6313	25.4448	19.6867	21.1395	9.72091	13.2006	13.4586	39.8496	29.4084	21.899	20.6704	25.7063	26.7321	20.821	18.2897	27.3024	27.8364	26.6728	24.5552	21.5685	25.2435	23.6767	21.831
FBgn0000442	Pkg21D	9.81338	8.48799	8.16775	12.1608	13.8145	5.4366	11.1628	9.96135	9.95312	7.75651	8.53347	11.2666	8.61042	6.39668	5.78496	10.6014	10.4276	5.75301	4.83864	12.8259	13.6126	10.9184	13.1567	12.039	13.8543
FBgn0000447	Dhod	28.7985	24.2989	26.6527	24.9413	21.5456	29.6611	43.0232	28.6906	29.7342	23.762	25.1416	20.872	17.6754	29.7715	41.7077	30.7176	30.731	26.4248	26.8402	21.1213	26.6124	28.1409	38.8361	39.5743	34.6882
FBgn0000448	Hr3	44.8192	73.5348	56.1234	28.0009	27.2065	91.4867	42.6511	71.4099	46.9174	55.1164	49.1822	53.0408	63.562	65.6706	40.4481	38.1474	39.0897	14.285	14.4021	11.6454	5.33998	80.1574	46.8411	30.2827	31.1197
FBgn0000449	dib	0.241623	0.55477	0.334352	0.193644	0.0844924	1.49191	0	0.292264	0.250393	0	0.41291	0.241644	0.187183	0.0896731	0.233265	0	0.0827587	0.146263	0.227701	0.0638106	0	0.268265	0.118886	0	0.524784
FBgn0000451	ect	3.41989	4.96519	5.73176	3.48559	2.83049	0.682736	2.97674	1.85101	1.25196	2.87278	2.47746	6.25254	7.08622	2.92932	3.1724	5.13918	4.49655	1.75516	1.70776	6.6044	3.80802	1.66324	1.54552	3.11779	3.67349
FBgn0000454	Dip-B	130.052	117.084	103.124	102.166	97.5042	82.0295	100.046	162.718	163.256	100.917	151.079	149.124	132.606	152.743	157.454	185.157	180	114.963	127.968	142.202	166.721	82.4377	94.3956	131.132	124.426
FBgn0000455	Dip-C	48.9935	46.7949	57.5564	38.2253	41.5702	53.5822	70.9766	48.5646	68.3573	41.1629	57.3945	42.771	36.3135	41.5485	59.949	43.3747	47.2276	42.6113	38.6237	45.497	53.2685	38.0399	53.8554	53.8977	54.6825
FBgn0000459	disco	22.8693	23.0507	16.2877	22.8887	24.0803	23.8705	14.5581	20.0201	18.7482	24.747	30.4636	25.9465	24.8686	22.4482	24.5394	33.4487	31.7517	19.9405	30.398	18.7922	19.9593	14.0839	15.8515	25.8684	22.2509
FBgn0000463	Dl	9.56751	12.1495	5.92281	13.0516	11.7867	8.47099	6.37208	9.59602	5.79034	10.301	9.68044	12.6863	11.7123	9.53524	5.08517	8.51635	7.50345	10.921	8.70955	14.1341	7.92243	9.92579	9.31275	10.2486	10.2858
FBgn0000464	Lar	22.3744	29.6525	28.611	15.1429	16.7717	38.3597	31.1627	25.013	28.4509	27.7839	20.2326	22.4729	31.0724	23.8232	24.7727	13.1563	11.9724	26.2298	25.1325	15.5379	8.97292	28.9189	19.3784	10.2486	14.1167
FBgn0000473	Cyp6a2	103.302	14.8678	17.1953	37.2958	31.8114	2.02292	1.25581	3.31233	2.12834	263.147	414.424	81.1923	65.8885	64.1462	80.0564	134.323	125.517	34.7618	57.039	40.3921	51.8679	101.726	141.197	398.8	314.871
FBgn0000477	DNaseII	31.2059	19.417	22.2106	55.9631	59.0179	4.57686	7.11627	16.4155	19.5619	14.487	35.6479	20.872	16.2047	16.8287	23.2332	76.6472	62.9242	17.7466	21.8593	32.7668	85.002	9.2283	10.5412	63.9919	36.6824
FBgn0000479	dnc	933.576	1261.24	1080.44	461.492	448.612	1721.68	1125.3	921.023	974.623	1279.74	1009.93	924.046	1271.96	1102.56	968.748	520.144	601.242	1278.53	1168.99	710.212	485.851	1037.14	837.91	477.825	736.587
FBgn0000482	dor	30.6259	37.336	28.7543	26.6067	25.7279	36.9183	43.9534	30.2494	37.3398	33.2422	31.06	24.5269	19.3066	29.6818	31.9573	28.2214	28.6345	26.9124	33.6143	27.2471	31.4271	29.4018	39.5098	25.1584	28.2334
FBgn0000489	Pka-C3	150.838	201.215	157.289	104.645	99.9122	177.385	114.884	143.965	135.306	341.861	233.891	259.646	282.192	129.458	99.9306	99.6707	106.538	156.258	121.279	131.641	114.109	115.702	102.718	89.2738	101.336
FBgn0000490	dpp	18.9481	16.1716	11.1292	24.8639	20.1092	13.9582	12.7442	14.2235	13.6777	18.4679	17.2963	18.7878	18.4776	22.209	19.4076	23.0529	20.5517	21.9394	19.753	24.3757	25.3868	16.3641	16.6441	21.0219	24.1401
FBgn0000492	Dr	10.0697	11.0677	10.9381	16.7308	9.63213	9.73531	3.90697	6.57595	9.70272	9.43914	9.7722	8.00445	11.0705	6.69559	11.8032	12.7745	12.9655	7.26439	11.755	7.62537	11.249	4.82876	8.91646	13.212	16.0059
FBgn0000499	dsh	56.7422	72.98	55.1681	45.3514	40.8943	79.1215	52.186	60.5231	53.678	70.9577	54.55	44.6135	38.0784	68.0021	66.807	50.5989	52.3862	59.529	65.3216	50.0275	52.218	60.2254	71.8865	46.6434	50.0644
FBgn0000500	Dsk	132.292	136.779	214.989	49.0306	54.1174	235.139	439.255	49.4658	82.1915	166.293	207.969	32.3803	41.1803	173.996	278.145	38.0006	37.9035	163.229	203.65	24.2799	30.3766	173.299	206.981	66.7084	69.6389
FBgn0000504	dsx	28.2801	27.9327	21.0164	45.7387	39.2045	18.1304	17.5349	31.0531	19.4993	22.1615	24.0405	25.9465	29.468	31.5948	23.6997	43.4628	48.5517	36.712	37.6845	27.9491	28.1443	18.0274	19.8144	22.9358	18.4199
FBgn0000520	dwg	28.2683	34.0629	39.0237	17.699	17.4054	45.01	42.186	26.6935	33.5213	31.0671	29.5919	19.8752	22.0876	29.1139	38.2087	19.9694	20.469	29.5451	32.8174	18.8241	27.0939	25.3242	34.5959	19.6946	24.5599
FBgn0000524	dx	5.48103	5.02067	2.72258	8.83016	6.84388	3.41368	2.32558	3.60459	3.3803	5.08893	5.41371	4.9537	4.19825	5.05159	4.10546	8.13459	7.03449	6.53308	4.75325	7.94442	7.79112	5.4726	6.41985	7.99513	4.51315
FBgn0000527	e	24.5086	37.0864	20.5388	24.9801	21.5456	7.35838	8.83719	16.4155	12.0502	20.9713	115.294	25.9163	23.4514	15.5732	19.3143	21.8489	19.9172	20.8181	17.0776	64.9911	38.2553	4.13127	12.0868	11.2981	8.44903
FBgn0000529	bsh	8.70614	10.9567	13.0875	4.76364	6.46367	13.503	7.81394	8.76793	8.01257	11.5322	11.1486	6.97747	6.1503	9.92382	10.6369	4.19944	5.48966	12.3836	10.3888	6.76393	6.78441	8.85273	12.4434	5.71081	6.19246
FBgn0000533	ea	24.8937	11.7334	14.2816	15.414	15.2086	17.3466	23.8604	13.225	12.9578	36.8537	33.0787	17.3379	20.1088	28.6057	47.8192	28.6913	22.5931	39.7348	40.303	26.8005	40.5313	17.9201	28.0571	22.4728	22.5132
FBgn0000535	eag	250.615	945.44	530.713	364.941	392.383	330.191	173.907	238.683	147.388	321.793	208.795	236.328	231.866	229.772	134.78	126.336	148.083	221.832	191.98	151.231	95.3756	217.911	158.555	96.8368	119.651
FBgn0000536	eas	99.5406	85.9062	78.334	133.924	135.779	81.8019	73.3487	90.4802	94.8989	76.2929	73.6356	86.6595	73.2153	92.0943	80.2897	177.14	154.014	85.7588	97.4844	124.112	115.685	75.9725	76.7608	132.028	93.3591
FBgn0000541	E(bx)	153.381	210.757	150.554	166.495	150.101	210.131	135.86	149.274	127.325	185.253	156.952	122.453	122.204	184.786	131.888	134.999	141.103	172.493	188.935	147.562	115.247	193.902	179.439	104.4	99.0268
FBgn0000542	ec	6.54141	6.46307	2.2927	5.6544	4.35136	3.54011	2.51162	5.40689	3.349	6.11492	7.79941	7.85343	6.89903	6.57603	4.29207	9.69102	8.68966	5.55799	5.52174	18.4413	10.5487	5.33846	7.64834	6.57514	5.87758
FBgn0000543	ecd	48.241	54.312	52.3023	34.6622	36.9232	60.1819	50.465	44.6677	61.2211	55.5678	52.2102	35.7029	36.982	50.2468	61.0687	39.9681	43.3379	56.0675	54.4774	43.7103	53.1372	41.8224	61.7019	35.2218	41.8253
FBgn0000546	EcR	58.3963	83.7703	57.3653	75.9858	66.7912	62.6094	54.9767	63.9328	37.6841	56.2655	54.8253	54.4605	46.047	68.7195	44.6002	53.2713	57.2966	62.4543	67.2002	59.4715	41.3192	79.916	63.6437	47.446	41.458
FBgn0000547	ed	133.658	170.952	109.954	119.091	114.698	175.16	101.209	162.158	111.425	150.657	121.946	158.73	147.474	142.341	92.0929	129.39	120.469	148.213	114.676	169.545	115.641	159.725	122.651	113.722	135.867
FBgn0000551	Edg78E	1.75355	1.85848	1.71953	0.697118	0.5492	3.71712	2.09302	1.87536	2.94212	2.21615	2.01867	1.1176	2.59382	2.45107	2.93913	0.822269	1.21379	2.38896	2.56163	0.701917	0.787866	1.3145	1.78329	0.463038	1.25948
FBgn0000552	Edg84A	0.305887	0.110954	0.525411	0.0774575	0.211231	0.834455	0.139535	0.438397	0.34429	0	0.275273	0.392671	0.0267404	0.448366	0.419876	0.1762	0.22069	0.585052	0.341551	0.414769	0.218852	0.268265	0.673688	0.0926077	0.104957
FBgn0000557	eEF1alpha2	1120.47	1058.95	893.533	1435.99	1354.41	980.738	663.673	1398.51	1252.47	1035.76	738.604	989.562	869.252	1216	1017.97	1522.67	1506.65	806.738	923.184	1091.39	1288.77	1231.6	1308.42	1153.15	1153.27
FBgn0000559	eEF2	2554.71	1851.93	1606.09	3722.42	3720.41	1704.01	1924.32	2195.54	2274.98	2101.19	2357.58	2297.07	1897.53	1689.74	2204.49	3824.05	3473.66	2148.85	2240.75	2962.95	3666.91	1929.28	2369.8	3782.38	3367.12
FBgn0000560	eg	0.441017	0.332862	0.382117	0.464745	0.422462	0.278152	0.232558	0.414041	0.68858	0.164159	0.0917577	0.181233	0.106962	0.418475	0.746447	0.998469	1.10345	0.585052	0.483864	0.574296	0.569015	0.0804794	0.277401	0.463038	0.524784
FBgn0000562	egl	74.9987	71.1493	59.5147	91.1288	85.8442	57.2487	39.2557	69.5102	65.4777	76.1287	63.1752	62.2535	48.1595	81.1542	69.3729	106.308	99.7242	74.1553	69.1072	97.2793	99.2712	72.0559	81.3578	83.563	77.773
FBgn0000564	Eh	8.84741	2.02491	2.86588	0.813304	0.126739	0.278152	0	0.63324	0.312991	10.7114	11.6991	4.62144	3.23559	30.7878	38.5353	27.6047	31.4759	12.5299	6.31869	13.3045	12.0368	0.0536529	2.17958	0.0308692	0.157435
FBgn0000565	MsrA	152.672	90.0115	122.421	100.424	120.402	117.532	157.07	161.598	239.501	159.234	192.278	100.977	131.697	164.939	234.618	110.536	134.593	236.166	314.369	109.084	163.395	108.674	146.032	109.987	138.596
FBgn0000566	Cth	29.5031	22.9675	25.5541	31.9512	34.2617	25.0589	23.9069	20.9213	24.2255	38.0438	36.3819	23.953	22.2213	27.2905	42.2209	36.6203	39.7517	30.1789	33.9843	28.5553	36.023	18.8858	27.2646	30.4062	27.4462
FBgn0000567	Eip74EF	40.4503	71.9815	47.6213	51.8578	54.7088	30.0404	33.6744	39.5531	26.6668	38.167	41.1075	35.2498	25.0291	37.4535	24.866	35.4457	39.7793	52.2646	55.7867	65.5654	40.5313	31.2796	35.1903	27.4427	29.5454
FBgn0000568	Eip75B	299.399	381.321	277.656	221.567	210.259	450.96	257.953	307.925	221.003	481.068	328.217	308.912	241.038	368.377	268.068	244.684	286.841	357.077	331.39	236.227	187.906	347.322	313.661	237.693	318.439
FBgn0000575	emc	200.679	244.654	238.011	217.965	182.503	246.493	138.465	201.492	190.799	217.552	200.537	172.775	165.229	232.223	197.995	192.323	212.11	180.927	224.684	179.499	155.91	240.982	220.93	171.016	191.231
FBgn0000576	ems	2.94337	2.71837	2.62705	2.74974	1.35188	3.9447	2.09302	2.60602	1.69015	3.4063	2.98213	2.62788	2.19272	3.49725	4.38537	3.96451	4.13793	3.36405	3.21627	3.35006	3.37032	2.17294	2.97215	2.96345	2.25657
FBgn0000577	en	3.09125	3.99435	1.76729	2.5561	1.77434	4.19756	1.34883	3.43411	3.75589	3.85774	2.93625	2.53726	3.23559	3.22823	2.84583	3.11287	2.67586	3.75408	2.61856	3.86054	3.50163	3.35331	3.20993	2.59301	4.04084
FBgn0000578	ena	54.3525	71.5931	46.0929	45.9323	42.7954	78.894	38.6046	57.2838	43.2241	74.364	56.798	43.3751	42.4638	70.214	45.8132	50.9513	52.1379	67.9148	66.1186	59.4077	48.8915	59.7425	58.4524	39.5743	43.8195
FBgn0000579	Eno	1066.41	811.435	963.413	1113.03	1100.81	782.011	1044	912.717	1181.6	766.376	1028.42	1076.95	1040.36	800.093	1014.93	1137.05	1173.96	961.143	998.61	1420.3	1884.23	777.055	1049.29	1271.75	1284.3
FBgn0000581	E(Pc)	96.2108	123.991	89.1288	126.14	115.417	120.718	88.651	99.0046	62.0348	109.617	95.7492	75.2419	64.4712	110.956	85.1882	89.0693	94.0966	101.36	113.623	90.8025	79.0055	112.859	116.707	71.8636	73.3648
FBgn0000588	esc	5.39916	7.98869	2.81811	3.67923	3.59093	13.4271	10.5581	10.7651	5.44605	10.3831	6.5148	7.03788	4.92024	5.61951	2.84583	2.76047	3.11724	4.43664	4.38324	3.89245	3.41409	3.86301	2.97215	1.94476	3.20118
FBgn0000591	E(spl)m8-HLH	0.00199019	0	0.0477646	0	0	0	0	0	0	0	0	0	0	0	0	0	0	0	0	0	0	0	0	0	0
FBgn0000592	Est-6	100.309	22.4405	29.0887	182.374	215.033	10.0388	38.4651	57.6005	74.8675	59.918	64.1845	173.893	183.012	32.9698	36.5759	191.471	174.235	19.453	27.8079	74.6265	90.0794	23.5536	23.1828	367.807	234.736
FBgn0000594	Est-P	0.579942	0.0277385	0.0955293	0.116186	0.0422462	0	0	0.0974215	0.0625982	0	0.183515	0.634315	0.534809	0.687494	0.559835	1.2334	1.29655	0.438789	1.76468	0.765728	1.1818	0.429223	0.435916	1.38912	1.9417
FBgn0000606	eve	0.221224	0.443816	0.286588	0.116186	0.0422462	0.480444	0.837208	0.243554	0.312991	0.123119	0.0917577	0.060411	0.240664	0.149455	0.186612	0.264301	0.303448	0.0487543	0.170776	0.255243	0.131311	0.0804794	0.356658	0.0308692	0.0524784
FBgn0000611	exd	134.797	163.241	165.791	167.231	150.27	155.967	104.465	141.261	105.102	136.785	118.23	112.334	111.534	145.091	112.387	134.676	136.91	118.766	143.964	151.327	112.227	179.952	146.309	126.842	94.4612
FBgn0000615	exu	0.780838	0.471555	0.286588	3.29194	2.99948	0.480444	0.790696	0.901149	1.75275	0.369358	0.550546	0.302055	0.374366	0.119564	0.0933059	1.20404	0.993104	0.438789	0.11385	0.47858	0.525244	0.187785	0.554802	0.987815	0.472306
FBgn0000617	Taf9	12.7876	11.0677	11.7501	9.52728	10.646	14.1605	15.4883	12.7866	17.058	12.4761	11.1486	12.3238	13.5307	12.2254	16.4685	13.3619	10.8138	12.9686	13.5767	11.2307	12.8685	10.7038	15.7722	12.039	12.9097
FBgn0000618	e(y)2	8.37063	7.65583	9.4574	6.39025	5.82997	7.56067	15.4883	7.06306	12.5196	5.66348	8.16644	9.60534	8.77087	7.95102	11.43	6.46068	6.37242	8.82453	8.45339	6.63631	7.74735	7.10901	8.75795	6.32819	10.6531
FBgn0000625	eyg	18.526	32.676	27.2736	13.284	14.0257	17.1948	14.5581	22.4557	24.8515	20.7661	16.4705	19.9054	17.2476	19.6085	16.9817	14.8008	16.4138	17.8928	17.2199	18.5051	21.4475	13.3059	16.1289	12.1933	19.417
FBgn0000629	E(z)	34.7432	40.1376	38.2595	29.2789	29.3611	53.6833	53.1162	30.1763	32.8641	41.5322	34.9138	25.6445	27.4892	36.5866	39.3751	28.985	30.4	37.102	41.4984	27.5981	27.3565	33.694	40.8176	25.3128	28.6532
FBgn0000633	tei	86.7977	119.581	81.4387	76.2957	75.1137	127.621	80.7441	95.8627	76.9645	100.629	72.0757	64.3981	68.3218	107.817	83.7887	70.95	76.8	101.409	99.0213	85.6339	70.2952	115.971	105.809	58.9602	67.6447
FBgn0000635	Fas2	142.227	202.63	136.034	141.128	135.272	139.379	103.023	132.591	103.506	172.695	132.315	137.556	141.805	168.287	130.302	129.126	145.986	174.394	165.481	150.115	123.126	150.201	146.27	118.785	133.453
FBgn0000636	Fas3	74.2505	99.2762	73.8919	67.388	64.7211	66.2001	45.0232	64.7366	62.1913	91.0262	66.2491	89.4082	87.2808	78.9721	61.022	67.1617	67.8897	91.5119	84.2493	104.681	83.1199	69.7488	62.4549	66.7393	67.0674
FBgn0000639	Fbp1	1.36674	1.88622	2.48376	0.774575	0.337969	0.682736	0.465116	0.219198	0.0625982	0.738715	0.550546	2.50706	0.534809	0.29891	0.606488	0.293667	0.137931	0.34128	0.284626	17.3246	0.262622	0.348744	1.30775	0.246954	0.104957
FBgn0000640	Fbp2	0.650232	1.27597	2.10164	0.193644	0.0844924	0.177006	0	0.0730661	0	0	0.183515	1.90295	0.0534809	0.0896731	0	0.0293667	0	0.0975086	0.0853878	8.423	0.218852	0.0268265	0.277401	0.154346	0.157435
FBgn0000644	Fcp3C	1.74512	1.83074	2.77035	0.890762	0.844924	4.39986	1.06977	2.75216	3.22381	1.64159	2.43158	1.17801	2.2462	1.43477	2.61256	1.08657	1.48966	1.41388	2.27701	1.2124	1.09426	1.07306	1.62478	0.864338	0.419827
FBgn0000658	fj	5.42763	5.07615	3.00917	4.29889	3.08397	3.08496	2.27907	2.84958	3.12991	4.14501	3.8997	6.31295	4.65284	3.70649	2.84583	5.55031	4	10.5797	6.85948	25.5562	12.2119	2.65582	3.80436	3.36475	3.30614
FBgn0000659	fkh	35.1763	54.8113	36.5877	23.1985	21.8413	49.6122	20.1395	35.705	25.6966	46.6622	36.7949	33.951	35.0835	48.4235	37.5556	27.8103	29.6276	40.3198	45.3694	31.9053	24.6427	43.2174	46.8015	21.238	27.2363
FBgn0000662	fl(2)d	133.522	182.187	156.716	90.4317	88.9705	200.118	152.093	116.662	133.334	177.251	136.719	106.051	118.166	155.463	152.928	99.3183	114.648	149.188	163.717	100.023	109.601	140.651	173.178	81.1552	105.954
FBgn0000667	Actn	217.041	226.097	183.942	260.645	215.287	184.339	154.511	164.374	166.449	200.972	189.617	228.505	237.134	179.615	156.8	160.93	195.255	218.176	207.834	395.243	448.34	173.487	236.623	197.841	226.969
FBgn0000709	fliI	50.5348	80.1366	48.4333	41.7109	42.9644	79.1721	48.9767	56.5532	45.9471	63.4885	47.0717	42.1064	32.5699	54.1924	42.9207	46.1645	46.2621	55.6774	52.9119	47.2837	49.1541	53.787	59.7997	36.6109	38.939
FBgn0000711	flw	430.266	479.821	476.691	373.5	389.763	444.234	531.674	515.92	463.884	439.002	467.23	426.471	506.999	454.673	395.244	375.336	398.042	468.626	438.523	439.177	317.423	491.273	367.398	304.741	360.737
FBgn0000715	FMRFa	35.3069	51.3163	59.9446	18.6285	19.6867	65.4668	56.1394	29.7136	44.1317	42.8455	30.8765	24.3758	23.6386	40.9806	53.8375	20.9091	23.1724	39.9298	42.1816	18.4732	20.2219	33.6135	41.1742	19.9724	26.1343
FBgn0000719	fog	37.2098	49.2636	38.9759	46.2809	40.8098	29.1048	19.3488	35.705	23.9751	32.7497	30.4636	33.1354	30.5911	48.0349	37.7422	47.5741	44.6897	34.3718	35.9482	41.7641	36.5045	40.9372	37.9247	37.9383	39.2014
FBgn0000721	for	80.5034	54.3398	42.1284	123.467	107.897	46.7295	35.2092	62.8369	62.8799	78.0166	72.718	80.9809	64.391	60.7386	60.5088	128.01	127.035	63.7219	70.388	98.1408	115.335	52.7945	63.4456	149.747	110.625
FBgn0000723	FER	124.161	118.665	109.238	152.204	146.045	95.4566	88.2789	128.548	127.106	125.048	118.276	117.197	102.657	103.184	101.75	134.265	154.372	139.632	109.78	145.297	162.826	106.501	106.443	126.409	160.689
FBgn0000808	gd	0.116157	0.249647	0.0955293	0.271101	0.168985	0.0252865	0	0.0487107	0.0312991	0.738715	0	0.151027	0	0.119564	0.0933059	0.0293667	0.0827587	0.243772	0.142313	0.191432	0	0	0	0	0.104957
FBgn0000810	fs(1)K10	19.5131	24.3544	21.8284	22.0754	19.3488	21.7717	13.1163	18.5588	13.5525	26.9631	20.0032	18.5764	15.1886	23.584	21.8802	16.5041	18.9517	18.3316	21.3754	18.5051	19.3027	19.637	23.5395	15.9903	15.3762
FBgn0000826	png	1.16777	2.08039	1.91059	0.813304	0.802677	2.60451	4.0465	1.48568	1.28326	0.779755	0.596425	0.483288	0.989396	0.986404	0.839753	0.851635	0.965518	1.46263	1.5939	0.606201	0.262622	0.751141	1.18886	0.432169	0.209914
FBgn0000927	fs(1)Ya	0.492142	0.610247	0.62094	1.16186	0.337969	0.859742	0.744185	0.414041	0.0938973	0.984954	0.367031	0.181233	0.508068	0.29891	0.419876	0.205567	0.524138	0.68256	0.370014	0.287148	0.350163	0.509703	0.396287	0.463038	0.419827
FBgn0000928	fs(1)Yb	0.670388	0.832156	0.573176	0.542203	0.5492	0.885028	0.465116	0.584529	0.156496	1.68263	0.871699	0.362466	0.802213	0.448366	1.44624	0.646068	0.358621	0.926332	0.796952	0.510485	0.656555	0.724314	0.752946	0.463038	0.0524784
FBgn0000964	tj	11.6186	11.9276	14.5682	16.7696	15.0819	12.3398	8.13952	12.7379	11.1425	10.6703	9.03814	12.6863	12.6482	10.3124	7.32451	12.7745	10.731	7.75194	7.4572	12.7302	12.5621	11.4281	12.2056	13.1194	12.6998
FBgn0000996	dup	5.20181	5.79735	4.20329	4.60872	4.68933	5.94233	0.976743	5.01721	4.53837	6.07388	6.88183	4.28918	5.96312	4.36409	5.22513	6.28448	5.71035	5.46048	6.31869	7.01917	7.0908	4.53367	6.02357	4.10561	3.72597
FBgn0001075	ft	3.89484	5.13163	4.29882	4.33762	3.59093	3.5654	0.511627	3.60459	2.53523	2.7907	5.82662	3.98712	3.44952	2.54074	1.16632	2.67237	3.28276	5.31422	2.02084	10.3373	5.69015	4.77511	5.50839	2.65475	3.8834
FBgn0001077	ftz	0.175176	0.332862	0.143294	0.0774575	0.126739	0.531017	0	0.170488	0.187795	0.164159	0.275273	0.0302055	0.0534809	0.0597821	0.0466529	0.0881002	0.137931	0.146263	0.142313	0.159527	0.0437704	0.268265	0.475545	0.123477	0.419827
FBgn0001078	ftz-f1	103.729	138.498	104.27	97.4803	97.5887	151.466	96.9301	113.959	78.9677	115.445	82.0773	98.6209	94.2601	125.632	88.4073	84.5175	88.6069	115.45	119.771	100.789	67.7127	153.742	113.378	81.5874	80.3445
FBgn0001079	fu	17.4818	22.8011	17.052	18.6673	17.0252	23.567	14.7442	18.0473	18.7169	17.4009	17.6634	11.5385	10.3218	17.6357	18.7078	17.7081	18.1793	14.7238	17.3906	17.4841	20.7034	18.0005	21.4788	14.2616	15.7435
FBgn0001083	fw	17.494	14.008	8.93199	24.1667	25.8124	8.47099	3.6279	13.6147	13.083	10.342	11.8367	16.0995	9.14523	12.3749	6.67137	26.4007	24.1379	16.674	7.99799	39.6264	41.8007	18.5103	17.3574	24.9732	24.1926
FBgn0001084	fy	6.31882	8.23834	5.3974	5.96423	6.21019	8.47099	6.65115	6.60031	6.13463	4.67853	6.69832	4.68185	5.29461	8.72818	6.85798	5.10981	6.0138	5.75301	7.05872	4.75389	5.38375	7.4041	9.03535	4.96995	5.56271
FBgn0001085	fz	17.2956	26.2129	19.7268	13.4776	15.4621	21.8728	23.1162	17.4384	16.745	19.9043	20.5079	15.0725	14.0922	18.5623	14.649	14.0079	14.0138	20.3306	19.0984	17.867	11.9931	21.488	16.5252	10.1251	12.8047
FBgn0001086	fzy	0.340966	0.471555	0.334352	0.387288	0.211231	0.354011	0	0.340975	0.312991	0.451437	0.137637	0.120822	0.213924	0.358692	0.32657	0.117467	0.137931	0.975086	0.740027	0.797633	0.744096	0.214612	0.277401	0	0.157435
FBgn0001087	g	138.873	204.627	139.664	98.8745	98.6871	253.169	168.372	157.75	148.42	197.812	146.216	119.251	129.37	162.577	137.673	96.4404	99.2828	156.696	154.694	108.382	95.6382	133.784	142.426	79.8278	103.33
FBgn0001089	Gal	18.2082	12.5933	14.807	18.0476	18.5883	10.0893	13.3953	15.3195	17.4023	28.7278	23.3982	15.0121	13.183	20.4754	22.9066	24.2276	20.1931	15.2601	18.0453	15.7612	17.3331	14.9423	23.5791	21.2998	22.4083
FBgn0001090	bnb	315.224	350.504	290.696	254.951	240.001	317.093	184.837	259.58	274.994	441.095	348.771	205.005	187.718	311.136	330.816	283.272	291.117	295.402	365.801	394.158	369.728	356.819	489.811	334.993	387.081
FBgn0001091	Gapdh1	835.243	579.68	618.122	832.668	836.77	529.272	805.487	691.595	959.005	603.325	657.398	1013.18	1059.22	585.147	678.987	1001.32	1016.77	704.549	639.184	1264.25	1795.42	548.36	656.965	987.29	981.871
FBgn0001092	Gapdh2	746.919	724.53	731.038	708.078	750.081	704.457	810.464	675.935	908.707	611.328	640.377	732.846	755.605	565.449	694.709	721.658	725.076	689.484	673.88	1113.05	1247.59	605.044	711.256	708.449	716.96
FBgn0001098	Gdh	789.778	695.599	587.744	865.549	824.012	555.09	661.301	1022.22	1130.34	628.442	533.801	786.611	614.79	656.646	573.878	991.95	1052.36	617.522	544.66	1203.05	1465.43	633.587	728.019	758.951	823.124
FBgn0001099	gdl	0.0599965	0.055477	0	0.193644	0.0422462	0.101146	0	0.219198	0.187795	0.0410397	0	0.060411	0	0.119564	0.186612	0	0	0	0.11385	0	0	0.0268265	0.0396287	0	0.0524784
FBgn0001104	Galphai	28.3779	26.7122	28.2289	37.8767	31.6424	25.944	29.1627	26.0359	25.2584	30.4515	24.0405	27.5776	26.0452	23.0759	21.5537	31.0994	30.9793	27.3024	25.7017	35.5425	32.3901	20.2271	22.7469	36.2096	35.2655
FBgn0001105	Gbeta13F	1106.05	1364.82	1383.5	639.528	660.308	1815.72	1621.86	1120.03	1255.78	1254.34	1139.63	1076.4	1424.3	1165.51	1217.64	673.144	759.862	1412.56	1197.76	859.434	641.542	1255.34	997.494	638.19	970.379
FBgn0001108	DCTN1-p150	93.5542	120.968	96.9144	97.519	94.378	121.603	78.2789	94.2309	88.2948	114.008	96.0704	71.4662	65.7815	96.4883	89.387	76.9115	78.5931	102.433	106.109	95.9074	95.0692	87.9908	120.035	75.7839	81.0792
FBgn0001112	Gld	13.0586	10.5961	11.0814	24.6315	22.7284	6.42278	7.44185	5.60174	2.31613	16.9905	9.63456	15.1632	12.0867	8.39938	7.79104	11.0713	9.68276	20.2818	14.9713	22.3337	24.4239	8.98686	10.2638	17.0707	13.4345
FBgn0001114	Glt	245.083	67.8762	60.6133	322.262	346.25	38.6125	19.4418	84.1478	130.236	475.24	646.02	251.34	215.795	68.3309	138.326	557.528	446.014	84.5887	108.414	288.137	475.259	30.7699	56.3124	599.974	370.498
FBgn0001120	gnu	0.074831	0.166431	0.0477646	0.735846	0.0844924	0.0505731	0	0	0	0	0.0458789	0.060411	0.160443	0	0.139959	0.0587335	0.0827587	0	0	0	0	0.0268265	0	0.0308692	0.104957
FBgn0001122	Galphao	426.539	733.323	471.007	386.629	354.783	691.384	442.557	505.666	312.083	523.38	369.967	404.995	396.427	490.123	310.848	305.678	312.359	636.293	491.378	510.485	272.646	509.729	352.379	232.414	220.409
FBgn0001123	Galphas	130.572	178.581	162.065	107.666	102.151	193.796	159.535	124.699	136.652	158.578	123.598	109.978	121.883	139.262	127.969	100.376	109.048	134.659	135.767	119.709	98.8772	149.343	134.262	94.9229	110.362
FBgn0001124	Got1	225.528	149.594	169.564	252.124	243.465	142.262	180.139	234.079	294.431	154.474	183.24	280.881	220.582	188.164	235.131	401.296	383.697	203.842	216.885	265.995	331.254	118.814	138.701	246.83	177.22
FBgn0001125	Got2	265.812	140.69	139.377	227.454	205.528	128.708	195.162	202.296	311.27	161.409	243.066	350.655	263.474	171.604	269.327	628.331	600.635	219.394	235.613	382.768	480.905	121.309	151.263	326.782	222.456
FBgn0001128	Gpdh1	364.267	323.598	297.287	377.605	404.634	266.621	279.488	341.194	389.486	274.351	313.215	399.921	363.242	239.995	220.715	412.25	372.304	283.701	242.16	582.272	580.614	320.254	343.7	591.269	522.528
FBgn0001133	grau	32.6652	39.0281	45.0898	25.6384	27.0376	49.5363	36.372	28.0574	36.1818	40.4241	30.6012	26.2486	26.1522	31.4753	40.4947	25.5491	26.069	32.4704	31.5935	25.7795	33.7032	28.4629	44.186	25.5288	28.2859
FBgn0001134	Grd	7.27958	9.90265	7.35575	7.51338	7.18185	8.92614	1.95349	9.62037	8.76375	8.00275	7.06535	6.01089	2.70078	7.77167	5.13182	6.43132	8.77242	6.7281	6.29023	10.784	7.92243	8.47716	8.87683	5.49472	7.03211
FBgn0001137	grk	15.1192	11.2064	11.6068	15.414	14.7017	17.9787	18.7907	16.4155	16.3694	16.6211	14.8189	17.0963	19.7612	9.17655	8.0243	10.4839	11.0621	14.675	13.662	13.2088	12.1244	18.2152	18.9425	20.0959	22.4083
FBgn0001138	grn	10.6617	16.1993	11.9889	7.20355	7.51982	15.9558	9.76743	10.3754	8.20037	12.6813	8.80874	9.21267	9.68004	14.3477	9.47054	8.81002	8.4138	14.9676	12.5235	11.3264	9.62948	11.2403	11.2149	7.84078	8.50151
FBgn0001139	gro	150.626	246.512	148.548	115.334	117.909	276.812	144.79	156.873	129.547	217.1	141.445	121.909	101.079	173.009	147.33	112.944	115.972	193.701	172.256	127.972	100.934	167.719	163.785	98.5346	123.009
FBgn0001142	Gs1	237.582	227.595	256.639	232.605	186.306	235.316	226.744	259.75	274.618	198.14	210.951	229.743	199.591	217.906	220.202	204.099	202.041	219.736	215.348	297.198	285.208	255.951	264.958	333.573	247.751
FBgn0001145	Gs2	669.46	636.405	515.285	934.835	901.196	261.893	332.976	574.665	579.597	569.632	598.398	833.49	764.509	467.167	422.676	808.114	790.097	537.955	532.706	1029.78	1059.11	513.512	515.926	936.634	950.489
FBgn0001147	gsb-n	0.166533	0.110954	0	0.116186	0.168985	0	0	0.0730661	0.0938973	0.0820795	0.0917577	0.0906165	0.0802213	0.209237	0.233265	0.616701	0.413793	0.292526	0.426939	0.255243	0.175081	0.0268265	0.158515	0.123477	0.157435
FBgn0001148	gsb	0.0524491	0	0.0955293	0.116186	0	0	0	0.0243554	0.0312991	0	0.0458789	0	0.0267404	0.029891	0	0.146834	0.137931	0.0975086	0.0569252	0.159527	0	0	0	0.185215	0.104957
FBgn0001149	GstD1	359.442	195.695	267.816	321.139	347.982	160.797	206.279	184.955	266.731	264.953	313.032	362.013	395.892	320.402	538.002	540.524	587.973	359.563	499.974	383.215	525.157	204.605	291.192	458.809	629.899
FBgn0001150	gt	15.068	19.3337	13.4219	6.58389	6.84388	22.1257	11.8139	16.6591	14.8045	24.7059	17.7551	13.1696	19.1194	23.5541	19.7342	9.19179	11.4207	19.5992	24.6201	13.9107	14.9695	11.5354	12.2453	5.27864	9.2362
FBgn0001168	h	37.7991	30.0131	29.9962	40.975	32.952	21.6706	23.5348	25.1835	28.67	32.6676	30.8765	38.4818	38.7202	35.5703	38.0221	53.4475	51.3931	44.4152	48.9556	44.8589	41.8882	19.9052	23.0639	53.6198	78.2978
FBgn0001169	H	20.5554	23.4668	16.9564	24.7477	23.1087	23.9716	24.5581	20.1175	13.6151	19.2066	20.0032	18.2139	13.7981	24.0025	17.7281	21.4084	22.2069	23.2558	23.4532	22.8442	14.9257	21.6221	24.1339	18.6141	17.3704
FBgn0001170	H2.0	0.599998	0.610247	0.0955293	0.890762	0.844924	0.682736	1.06977	0.584529	0.907674	0.861835	0.458789	0.422877	0.58829	0.747276	0.979711	0.440501	0.634483	0.292526	0.626177	0.574296	0.656555	0.37557	0.554802	0.185215	0.314871
FBgn0001174	halo	0.138563	0.305124	0.0477646	0.193644	0.0844924	0.126433	0	0.0487107	0	0.123119	0.183515	0.120822	0.213924	0.0597821	0.186612	0.0293667	0.0275862	0	0.142313	0	0.0437704	0.295091	0.435916	0.185215	0.472306
FBgn0001179	hay	18.5038	24.8815	18.5327	15.6851	13.9412	28.1692	16.3721	17.1705	16.8389	25.2394	22.2513	13.8341	14.6538	20.5949	22.58	14.977	15.0069	20.233	22.2293	16.846	16.9829	18.4029	22.1921	14.3542	12.1225
FBgn0001180	hb	8.09748	9.4311	9.26634	7.66829	7.39308	10.9238	6.60464	6.94128	6.38502	8.61835	9.1299	6.67541	5.77594	8.90753	7.04459	6.66625	7.58621	8.04446	9.67728	8.9973	11.5991	7.43093	9.94681	6.17384	7.45194
FBgn0001185	her	33.0038	37.1419	31.1903	27.4587	25.8547	44.8077	30.1395	33.5861	33.9595	40.5883	31.5647	26.9131	25.9115	37.5431	36.296	31.5692	31.9173	30.1302	33.9843	28.2681	28.582	41.6615	41.0554	30.3753	31.592
FBgn0001186	Hex-A	692.754	784.612	674.198	439.184	414.477	997.326	682.045	654.234	710.02	845.911	563.026	803.526	775.874	715.621	744.487	532.067	511.642	1065.38	788.983	722.751	619.963	669.991	586.624	570.093	754.063
FBgn0001187	Hex-C	53.5411	21.636	35.0115	97.9838	96.9972	10.8479	14.3721	19.2407	31.7373	14.8974	45.9706	63.3409	29.9493	14.1385	41.801	114.824	113.021	26.4736	34.8951	53.6328	80.8438	7.43093	14.2267	201.113	100.601
FBgn0001189	hfw	18.9277	16.8095	13.9473	25.4448	25.8547	13.3007	11.0232	14.0287	12.1754	30.2463	26.6097	13.381	13.5307	17.3069	16.2819	27.9571	24.4414	16.674	18.8707	22.2699	22.498	12.3938	15.9307	24.4484	18.8398
FBgn0001197	His2Av	100.273	126.515	116.355	69.4019	61.5104	124.688	91.8603	86.6321	105.854	125.417	121.625	98.7719	117.016	98.76	130.721	68.1896	71.3655	117.644	121.791	73.6375	81.5442	102.96	120.59	72.5118	101.178
FBgn0001202	hook	145.168	180.411	158.579	115.063	110.051	206.237	170.046	151.734	188.327	160.958	140.802	122.423	121.963	155.194	164.265	117.526	128.166	163.717	154.609	122.485	132.712	134.803	156.613	104.863	122.485
FBgn0001206	Hmr	13.8546	20.5265	14.7593	11.8897	9.12517	21.8728	22.6046	11.9341	11.5807	14.9795	15.6906	10.874	9.86722	15.0651	13.0162	9.07432	9.98621	16.1864	17.1914	11.3902	12.0806	14.3522	19.7351	9.2299	9.4986
FBgn0001208	Hn	138.115	55.3383	49.8185	324.934	254.026	22.505	18.279	62.5446	79.9379	45.2258	90.152	193.587	119.022	63.8771	103.569	355.866	323.366	61.4792	103.234	174.075	229.926	32.1917	42.0064	344.902	164.887
FBgn0001215	Hrb98DE	363.912	557.516	424.198	277.763	277.008	497.563	331.162	402.765	381.724	439.125	327.575	299.85	344.524	425.499	368.232	306.941	307.779	449.417	419.909	304.76	279.211	370.259	392.205	256.029	292.882
FBgn0001216	Hsc70-1	37.8213	37.8076	32.9576	43.0664	39.4579	32.6955	37.4883	35.7293	35.4306	40.1369	27.9402	40.0525	50.6731	34.1057	29.9512	32.9201	38.0138	43.1963	28.9464	40.9664	48.8039	34.472	40.7383	39.2348	42.9274
FBgn0001217	Hsc70-2	0.270084	0.0277385	0	0.271101	0.211231	0.58159	0.60465	0.340975	0.250393	0.369358	0.504668	0.271849	0.187183	0.149455	0.233265	0.264301	0.110345	0.243772	0.626177	0.0638106	0.262622	0.134132	0.356658	0.154346	0.262392
FBgn0001218	Hsc70-3	343.469	338.465	284.677	440.23	521.783	259.035	230.558	279.307	255.276	438.715	332.392	266.624	238.792	317.652	344.812	375.836	363.117	323.924	324.559	327.795	380.933	269.82	312.512	450.042	566.4
FBgn0001220	Hsc70-5	233.187	252.226	250.669	275.478	282.416	174.73	173.349	176.576	190.205	220.219	196.178	204.763	173.439	213.781	226.033	260.16	257.738	217.396	218.763	288.424	303.81	223.786	266.226	274.18	275.932
FBgn0001222	Hsf	76.88	99.5813	86.5495	74.243	70.7624	107.796	71.9069	73.1879	81.1899	87.3736	72.1216	59.384	53.9087	83.0074	81.4094	71.4493	72.0276	75.1792	83.5946	66.7459	66.6623	76.9919	97.7244	63.3128	69.0091
FBgn0001224	Hsp23	45.668	21.9134	32.4322	17.3118	18.7573	20.5074	43.6278	22.3095	28.5761	23.0233	49.2739	64.6397	46.6353	23.5541	34.01	17.4732	15.6414	59.7728	48.1302	72.0422	95.8571	30.7968	33.2881	99.0285	177.43
FBgn0001225	Hsp26	38.9506	8.40477	11.8456	29.7437	31.6001	9.71003	8.69766	13.4442	16.3381	10.9987	23.7653	86.146	49.8174	16.7689	27.7585	13.6262	17.6276	40.3686	30.3696	46.7732	66.3121	12.206	16.327	122.396	223.768
FBgn0001226	Hsp27	17.0494	9.68074	10.3649	5.30584	4.85831	4.80444	4.69767	4.50574	5.00786	14.9795	11.9744	43.6771	24.2001	7.26352	9.75046	8.13459	6.89655	27.3024	13.4628	16.6227	21.0098	7.24314	6.97465	45.9025	94.5661
FBgn0001227	Hsp67Ba	61.5586	72.6472	80.2923	36.1339	39.8804	57.6533	56.1394	54.3368	71.0177	69.152	61.7071	57.3904	63.7225	61.6652	67.4135	42.5818	42.8414	70.255	59.5437	53.8881	62.0664	73.0216	82.8637	56.3363	84.8576
FBgn0001228	CG4456	0	0	0	0	0	0	0	0	0	0	0	0	0	0	0	0	0	0	0	0	0	0	0	0	0
FBgn0001229	Hsp67Bc	19.3511	18.8067	24.5988	13.4002	15.6311	16.0822	25.3953	20.2637	23.1613	14.7333	13.7178	22.5333	20.9645	19.1303	16.1419	18.8241	18.9793	19.843	16.9068	21.7275	18.5586	18.3225	18.4274	20.0959	28.1809
FBgn0001230	Hsp68	43.5278	38.4733	38.4028	25.8708	30.5862	28.1692	21.7674	12.129	18.4352	25.3626	31.2435	81.6756	47.3038	31.9834	43.0607	25.6078	29.7104	52.7522	61.8777	51.7504	64.3424	14.835	21.558	108.598	139.173
FBgn0001233	Hsp83	1052.91	1119.69	982.136	1187.89	1385.59	973.885	970.51	993.65	1127.8	1248.26	1270.48	847.777	721.083	962.671	1121.26	1227.71	1195.31	816.684	985.517	775.235	1002.34	904.615	1211.73	997.724	1240.38
FBgn0001234	lncRNA:Hsromega	256.71	356.19	351.978	314.981	346.757	268.467	294.139	258.825	246.793	223.215	209.896	241.583	207.025	228.457	211.664	219.839	211.862	282.726	244.181	264.495	196.704	248.681	229.133	200.866	302.591
FBgn0001235	hth	553.764	767.636	554.834	329.427	340.589	855.013	460.139	505.301	430.926	802.204	607.299	619.847	744.802	614.649	556.056	425.612	443.835	792.355	725.141	492.682	306.042	594.179	431.002	388.489	502.271
FBgn0001247	Ide	114.016	147.513	123.949	106.659	103.292	161.96	126.884	106.896	122.004	133.215	107.448	84.1525	91.6662	120.401	120.878	98.4667	100.993	127.59	128.139	106.309	103.167	118.466	124.276	83.2234	88.846
FBgn0001248	Idh	255.634	156.223	159.916	337.947	350.263	112.651	133.907	191.287	205.385	156.772	160.484	286.469	225.101	139.382	192.07	627.773	538.593	144.215	171.886	276.364	359.705	127.292	171.394	542.681	367.454
FBgn0001250	if	61.1762	57.918	49.3409	87.1397	77.5217	51.6604	38.093	54.483	44.1943	60.4515	49.7786	69.8049	72.119	52.7278	44.3669	73.4168	63.4207	68.5973	62.6177	79.7314	70.0763	50.4337	52.9836	74.2714	63.0791
FBgn0001253	ImpE1	2.58374	4.85424	2.34047	3.05957	2.28129	4.77915	4.46511	2.97136	3.81849	4.10397	2.75273	2.56747	1.81835	0.986404	0.746447	0.704802	0.882759	1.90142	1.73622	2.3929	1.1818	2.7363	3.32881	2.87084	2.72888
FBgn0001254	ImpE2	0.104324	0	0	0.116186	0.0422462	0.227579	0	0.0487107	0.281692	0.246238	0.0458789	0.362466	0.187183	0.0597821	0	0.146834	0.165517	0.146263	0.0569252	0.127621	0.131311	0.0804794	0	0.0308692	0
FBgn0001255	ImpE3	0.519972	0.776678	0.955293	0.774575	0.380216	0.278152	0	0.755016	0.563384	0.164159	1.7434	0.362466	0.641771	0.29891	0.419876	0.704802	0.413793	0.731315	0.199238	0.606201	0.437704	0.187785	0.158515	0.4013	0.524784
FBgn0001256	ImpL1	0.908143	0.94311	0.811999	2.24627	1.73209	1.06203	0	0.730661	0.594683	0.615596	0.642304	0.483288	1.60443	0.269019	0.0466529	0.205567	0.248276	0.146263	0	0.0638106	0.218852	0.965752	0.990718	3.92039	3.25366
FBgn0001257	ImpL2	11.2173	5.29806	4.15552	12.2383	9.25191	6.5745	3.30232	11.4957	8.88895	12.5171	17.3881	17.9723	16.8732	7.59232	9.79711	12.569	15.4483	9.45834	12.5805	12.1878	9.06046	7.86015	10.2242	19.4785	17.003
FBgn0001258	Ldh	41.8939	10.9567	9.26634	8.79143	8.82945	10.9744	10.186	7.16048	8.01257	14.2408	17.3422	24.2852	26.8741	13.72	41.5678	18.2074	18.8966	175.759	173.053	165.078	142.21	9.6307	13.9097	24.7571	51.7437
FBgn0001259	in	2.10119	1.47014	0.0477646	2.32373	2.36579	0.809169	0	0.706306	0.469487	2.42134	3.48679	2.86952	1.41724	0.896731	3.12575	3.25971	3.25517	2.43772	2.67548	4.91342	4.98982	0.885273	1.26812	3.17953	1.15453
FBgn0001263	inaD	1164.8	865.691	792.511	1027.36	1015.94	584.827	697.72	1548.25	1753.09	1299.52	1094.07	994.606	803.791	1107.7	1200.8	1572.09	1546.57	1001.66	804.068	1480.5	1807.19	1081.29	1252.9	1201.34	1421.75
FBgn0001269	inv	5.26779	6.37986	6.2094	3.83415	4.18237	6.54921	2.51162	5.33383	6.8545	6.56636	5.55134	4.01733	4.6261	5.17115	4.8519	4.49311	4.02759	8.14197	4.95249	5.83867	5.03359	4.88241	6.22171	4.47604	5.72015
FBgn0001276	ix	12.3633	13.7028	14.3772	6.85499	7.94228	19.0155	10.9302	12.0072	15.0549	18.0575	13.5801	11.4781	15.7501	12.3151	14.9289	9.39736	10.5931	11.6035	12.8936	9.02921	10.8988	11.9109	15.6137	9.07555	9.70851
FBgn0001280	janA	21.2887	18.7235	24.551	16.5372	18.5461	37.5252	58.7906	31.4915	44.4134	22.3256	16.9752	14.2268	15.1084	15.095	23.0465	16.5628	16.1379	17.9903	17.5614	11.6135	16.195	11.2939	14.1871	15.8668	16.1634
FBgn0001281	janB	0.0127187	0	0	0	0	0.101146	0	0.0487107	0	0	0	0.0302055	0	0	0	0	0	0	0	0.0319053	0	0.0536529	0.0396287	0	0
FBgn0001285	Jon44E	0.15081	0.138693	0.0955293	0.154915	0.126739	0.126433	0	0.0730661	0.156496	0.451437	0.367031	0.151027	0.0267404	0.388583	0	0.1762	0.0827587	0.292526	0.0853878	0.127621	0.218852	0.0804794	0.0396287	0.154346	0.104957
FBgn0001291	Jra	54.4308	54.2011	63.527	43.1051	42.4997	62.8876	67.3952	48.3211	61.002	52.9823	47.3011	46.2748	50.6464	53.2658	75.2978	51.1569	50.2621	54.6048	58.4052	40.6793	48.7164	50.6752	68.8351	49.329	64.9683
FBgn0001296	kar	54.6437	47.3496	36.5399	60.1845	55.596	33.4035	45.3022	43.9127	40.7201	66.5665	68.3595	61.74	65.835	39.0377	35.4096	49.0718	48.7173	56.7988	42.9785	77.7852	95.8571	46.4098	55.3613	69.2397	69.2715
FBgn0001297	kay	157.4	168.317	133.502	215.642	215.244	172.555	131.302	175.188	149.078	150.37	119.147	142.328	131.055	155.613	133.101	166.921	157.241	165.813	156.146	150.497	165.583	131.557	140.761	164.07	186.561
FBgn0001301	kel	27.5748	34.2016	22.6882	37.4507	29.1076	30.4197	29.0232	25.7193	21.7216	26.0192	23.49	23.0468	19.7879	29.4128	21.8802	28.2802	29.7931	24.4259	29.288	34.8087	28.8447	31.4406	33.407	29.1714	18.3675
FBgn0001308	Khc	174.439	201.326	191.966	155.496	149.256	218.855	174.511	161.379	179.438	195.062	175.257	139.247	120.492	170.2	191.23	163.573	160.91	169.909	170.776	174.331	197.579	156.908	220.692	167.558	180.578
FBgn0001311	kkv	7.61375	14.8678	6.40046	3.52432	1.01391	3.0091	0	6.38111	1.00157	3.36526	28.4449	5.34637	4.22499	1.79346	2.3793	2.87794	2.01379	9.99464	2.24854	51.7504	13.8752	3.29965	11.3734	1.23477	2.30905
FBgn0001313	kl-2	0	0	0	0	0	0	0	0	0	0	0	0	0	0	0	0	0	0	0	0	0	0	0	0	0
FBgn0001316	klar	129.753	162.492	105.512	140.237	134.977	165.753	85.5347	129.303	97.7158	188.742	137.499	123.027	104.421	120.7	93.7257	99.5532	103.393	151.675	143.252	130.142	142.429	139.283	170.483	115.698	128.52
FBgn0001319	kn	16.519	22.9398	19.0581	13.0516	12.8851	21.7464	18.7907	19.192	14.8045	19.8632	15.7365	14.0456	14.1724	19.0705	17.7281	12.334	13.9862	17.2103	20.3792	13.6555	11.4678	20.0662	20.488	10.9277	12.8572
FBgn0001320	kni	16.2395	14.2299	11.2725	9.83711	9.46314	20.1028	7.11627	12.5917	10.7356	24.0903	20.3243	17.3984	20.4564	18.9808	26.2189	17.2676	14.6207	22.622	20.7208	17.1651	15.1883	11.2671	16.2478	14.879	16.9505
FBgn0001321	knk	3.20966	3.77244	3.1047	2.86593	1.90108	2.22521	3.2093	2.89829	2.03444	1.14911	3.85383	2.41644	2.08575	2.72008	2.65922	3.23034	2.31724	4.29038	2.24854	10.3054	3.19524	2.38755	4.0025	4.013	4.1458
FBgn0001323	knrl	20.2904	19.3337	13.7562	12.7805	11.5332	24.5532	16.093	15.4413	14.7106	33.2422	28.3073	20.4793	30.8585	23.7335	23.0465	18.3836	13.7379	29.3989	27.3241	22.7166	14.5318	18.3493	17.714	17.8424	19.1021
FBgn0001324	kto	52.2654	62.4394	45.4719	45.9323	38.6553	71.8137	36.186	50.1477	41.9095	82.2436	58.725	40.2639	38.3993	65.0429	55.7969	47.0455	47.2828	54.9461	66.3178	47.507	53.1372	51.5336	74.1057	38.0618	41.4055
FBgn0001325	Kr	4.27192	5.85283	5.01529	4.22144	3.8444	7.10551	4.74418	4.91978	3.349	4.84269	3.76207	3.47363	3.07515	5.76897	4.15211	3.20097	3.77931	4.92419	4.92403	3.35006	1.88213	6.0896	5.1121	2.4078	2.72888
FBgn0001330	kz	12.7881	18.03	12.4666	11.9285	10.7728	18.1052	14.1395	12.202	12.4257	16.4569	15.2777	8.09507	8.6639	12.8531	14.5557	10.3077	12.4966	11.6523	17.9599	10.433	10.7237	12.6353	15.6533	10.0016	9.07877
FBgn0001341	Mybbp1A	13.3333	13.9802	13.5652	10.8053	9.9701	21.0131	19.3023	12.884	13.9594	18.0575	11.378	7.76281	7.4071	15.633	16.4685	12.0697	11.8069	17.9416	16.1098	10.9116	12.8685	12.7426	13.8701	10.4647	9.02629
FBgn0001404	egh	138.476	194.586	114.922	102.399	97.4619	193.341	113.674	155.46	113.584	186.485	122.313	126.591	128.809	149.904	136.18	114.971	121.738	165.667	164.912	129.663	108.682	167.585	159.347	112.827	142.322
FBgn0001491	l(1)10Bb	17.3578	15.589	28.1334	20.1002	18.9685	14.1605	26.5581	15.9528	20.1879	9.15186	16.6082	14.8611	16.5523	16.6194	21.8802	15.4469	14.731	17.259	15.3413	17.2608	15.4509	17.9201	14.4645	15.1259	18.2625
FBgn0001565	Hlc	122.76	107.986	94.1441	152.127	135.357	144.993	147.442	148.008	186.511	114.706	98.7772	117.348	113.353	84.8607	111.687	121.608	132.276	93.8521	96.7159	96.6731	142.122	95.6363	114.091	145.61	150.351
FBgn0001612	Grip91	21.089	27.6276	20.8731	23.7407	21.4611	23.744	26.9302	23.0889	20.4383	22.4898	17.5716	17.9723	15.4827	22.2688	18.1013	18.7947	18.2897	20.8668	23.9655	21.4085	22.3667	25.3778	23.0243	16.0829	14.1692
FBgn0001624	dlg1	491.304	636.738	431.028	386.087	381.483	758.52	474.464	536.987	427.358	748.114	545.775	513.614	573.235	483.577	366.319	355.044	377.324	532.007	422.157	430.945	329.985	642.198	586.307	366.912	485.111
FBgn0001941	ifc	27.7545	29.2919	27.9901	32.5322	30.544	29.5347	26.279	27.9113	27.8562	27.4556	23.123	24.9497	24.0129	28.1872	29.0181	31.2756	31.0897	25.6448	28.6903	28.1405	29.0635	25.1632	26.0361	26.918	25.3996
FBgn0001942	eIF4A	1290.61	1157.5	1117.74	1573.24	1509.58	1086.16	1046.46	1139.1	1166.8	1061.94	1137.29	1210.3	1271.29	1089.74	1319.3	1484.69	1531.84	1248.74	1349.53	1262.56	1418.2	1179.48	1378.01	1632.49	1602.59
FBgn0001961	Arpc1	127.594	133.145	133.263	121.26	131.005	127.823	157.953	128.913	149.985	135.185	118.276	107.441	102.63	121.178	161.839	116.41	121.931	119.058	125.435	104.873	136.564	110.927	153.601	118.044	125.528
FBgn0001965	Sos	104.554	142.271	106.515	99.9977	89.7309	136.927	89.0696	99.1751	87.1054	149.836	104.558	77.5677	62.5726	122.822	101.937	95.5594	97.4345	108.722	125.349	93.3869	104.086	107.199	149.4	75.3209	82.7585
FBgn0001967	NimC3	0.13406	0.221908	0	0.193644	0.126739	0.0505731	0	0.0243554	0	0.0820795	0.0917577	0.271849	0	0.029891	0	0.205567	0.110345	0.195017	0	0.319053	0.612785	0.0536529	0.118886	0.246954	0.262392
FBgn0001970	Pgant35A	26.9334	26.8786	30.3783	23.5471	24.4605	29.2059	24.3721	25.6706	33.9282	38.1259	42.438	19.7242	20.9645	27.4101	35.3163	24.4331	23.4483	25.011	27.1533	18.6646	26.7875	23.9828	32.4163	20.0959	21.9885
FBgn0001977	CIAPIN1	25.8665	28.321	29.232	24.554	24.0381	29.6105	33.1627	22.0903	24.6637	30.9029	32.941	19.5732	22.3283	24.2117	27.6652	25.9602	24.8	25.4498	28.8611	22.5571	22.8044	22.2391	29.3649	22.6889	22.7756
FBgn0001978	stc	57.882	60.2481	53.783	44.3832	49.1746	89.135	61.7208	55.1649	59.6248	78.427	64.2304	38.5422	34.1743	59.2141	64.661	47.9559	48.7448	74.1066	69.1641	53.3776	60.1405	53.9212	75.889	45.316	48.0702
FBgn0001983	wor	0.0016137	0	0	0.0387288	0	0	0	0	0	0	0	0	0	0	0	0	0	0	0	0	0	0	0	0	0
FBgn0001986	Mtr4	20.0115	20.9981	17.5774	22.1529	20.0669	26.5761	30.186	22.1147	17.5901	23.3106	21.9301	13.6831	9.89396	19.3096	19.5476	18.8534	17.7655	17.0153	20.4077	15.7931	21.4912	19.8247	27.1853	19.108	17.8951
FBgn0001987	Gli	14.1096	9.73622	9.21857	21.8043	19.391	8.67328	4.51162	8.08598	8.51336	13.8304	15.7823	11.7499	10.6427	10.701	11.2434	19.4114	16.1655	14.09	12.6943	23.8971	19.8717	10.7574	14.7815	21.8245	21.2538
FBgn0001989	ND-B17	159.714	137.444	181.123	127.921	131.935	113.031	258.465	171.291	258.03	128.208	133.003	181.656	179.829	134.002	175.648	145.6	146.676	151.236	124.41	161.569	202.788	114.173	150.51	143.388	181.208
FBgn0001990	wek	9.90884	10.0968	12.3233	9.99202	8.02677	10.6709	8.97673	8.37825	9.57753	9.72642	8.21232	7.88363	8.2628	11.1195	9.89042	11.0713	11.4483	10.3847	12.4097	11.135	8.88538	9.33561	9.27312	10.866	9.86595
FBgn0001991	Ca-alpha1D	280.216	451.971	293.991	242.326	257.321	444.714	273.534	277.335	209.235	484.31	356.341	326.944	342.732	313.527	235.364	148.39	179.476	338.209	337.936	210.288	167.816	256.89	279.065	126.44	171.027
FBgn0001992	Cyp303a1	0.118176	0.0277385	0	0.116186	0.0422462	0.101146	0	0.0487107	0.187795	0.451437	0.458789	0.271849	0.641771	0	0.0933059	0	0.0827587	0.195017	0	0.0638106	0	0.0536529	0	0	0
FBgn0001994	crp	238.398	314.749	235.957	160.531	159.226	425.825	316.046	265.547	225.385	346.499	215.034	206.545	172.984	277.209	216.61	185.128	193.407	267.174	255.366	173.054	149.695	281.785	280.532	171.664	225.605
FBgn0001995	mRpL4	30.4852	28.5429	31.7157	20.4101	21.9258	32.4679	50.5115	29.056	41.8156	30.2053	30.9224	26.2788	28.7727	31.6247	38.7686	25.4903	25.2966	35.3469	26.3279	30.5015	30.3766	28.2214	34.5166	22.6889	29.8602
FBgn0002021	l(2)37Bb	31.3304	27.8772	28.5155	21.4945	19.053	35.4011	34.7906	31.0044	31.4243	34.6375	31.5647	26.2184	22.97	34.3448	40.0749	37.5013	40.331	34.3718	32.8743	37.1697	38.0364	25.9144	30.7915	27.0723	28.4958
FBgn0002022	Catsup	31.9205	20.4433	23.1181	43.5699	47.8649	17.1443	19.7209	25.2078	26.6981	26.4296	27.2062	23.1072	21.633	35.9888	34.6631	45.9883	47.2	27.4487	32.1058	36.6911	44.9084	22.9634	27.0664	45.316	43.6096
FBgn0002023	Lim3	23.3165	35.6163	25.1242	17.1568	16.5605	31.3806	18.7907	23.1376	25.4775	34.2271	25.3251	21.9594	20.2693	29.0541	24.866	16.5922	18.6207	24.6209	27.5518	20.1323	18.3835	25.3778	29.2064	13.0577	17.108
FBgn0002031	Phb1	97.8793	76.8912	77.2832	61.3851	65.2703	100.109	124.418	96.2768	120.47	84.706	75.5166	96.5367	94.2601	92.5128	113.413	97.9674	97.6552	113.598	100.217	119.007	132.931	84.557	103.986	106.993	113.144
FBgn0002036	CG10561	65.372	66.517	74.3218	64.4447	64.1297	68.3495	91.3022	81.006	97.4341	60.9851	62.8999	61.2567	52.2241	50.2767	67.2269	57.3826	61.3242	50.802	51.3465	56.9191	65.1741	59.206	74.8983	62.6954	66.805
FBgn0002044	swm	106.449	146.321	105.894	98.1	90.956	144.841	99.5812	98.5175	96.0257	130.753	107.081	88.3813	87.1471	118.548	108.141	97.615	100.166	104.724	121.934	101.969	100.147	104.945	124.038	83.8099	95.1434
FBgn0002069	AspRS	48.4818	40.6924	43.3703	53.8717	60.6233	42.7848	40.6511	32.758	43.8501	54.9522	60.4684	41.8346	35.3509	36.3774	55.7502	48.4551	47.0345	48.8518	56.0428	54.0476	58.2146	30.609	43.7897	62.7571	70.4261
FBgn0002121	l(2)gl	26.4269	21.4419	23.5957	45.2352	37.7258	23.2383	21.1628	22.066	15.1175	26.1834	22.343	25.6445	20.6971	25.2579	17.8681	36.4148	30.3173	29.3989	29.288	35.032	22.4104	23.6609	18.3085	36.3331	25.5045
FBgn0002174	CG5504	79.2541	78.3336	101.977	63.1279	66.6645	80.8663	104.884	68.5847	93.4278	67.3052	74.4155	51.6212	57.1176	64.0266	85.3282	61.7876	66.1242	77.4706	65.9193	63.683	84.9583	80.0501	129.348	101.776	113.301
FBgn0002183	dre4	45.1252	53.8405	43.5613	36.7923	36.7964	71.131	58.8836	37.6778	42.3164	62.0521	52.3478	33.4979	32.4094	49.111	57.803	36.6791	39.1448	49.2906	48.8133	31.5863	36.592	40.964	59.562	34.944	37.2072
FBgn0002283	l(3)73Ah	34.0041	39.5551	38.8326	23.0049	23.2354	53.1523	52.8371	32.0273	44.0691	40.7935	32.7116	27.8495	27.5694	37.0051	45.0201	23.5815	25.8483	40.4661	35.9198	25.2371	23.9424	35.0622	37.4491	23.4297	27.4987
FBgn0002284	Prosbeta6	59.4897	88.9019	84.7822	49.8439	50.3574	43.9733	90.3719	49.8554	60.376	45.431	107.173	42.5293	43.48	40.323	63.8679	54.4166	51.8345	51.5821	52.485	73.1589	54.888	34.7134	69.3899	61.3063	62.7117
FBgn0002306	sas	20.6181	17.1979	11.2247	31.6027	29.2344	12.7697	6.32557	11.788	10.5165	22.9002	24.0864	19.1201	18.3974	19.3694	16.1886	35.9743	28.1931	23.4021	21.3469	31.1715	28.8884	12.6353	16.3667	24.8806	21.2538
FBgn0002354	l(3)87Df	12.167	12.5933	12.1322	11.5412	11.2375	15.1972	15.3953	12.4699	12.8639	12.1067	11.5615	12.052	12.1402	12.076	13.4827	10.6014	10.9241	13.895	9.87652	12.3155	10.7237	13.1986	12.166	11.329	10.1283
FBgn0002413	dco	122.382	161.078	107.041	118.781	105.7	150.227	110.418	123.36	93.553	138.878	115.89	102.306	93.6183	147.542	111.78	122.577	120.635	148.164	135.966	147.052	122.513	143.575	122.849	99.615	94.0414
FBgn0002431	hyd	110.986	145.211	99.7325	158.982	145.031	137.989	98.9301	105.873	76.3698	131.45	104.879	76.7219	65.9687	127.156	87.9874	117.056	117.021	108.625	121.82	108.095	90.5171	119.753	134.777	98.905	84.8051
FBgn0002440	l(3)mbn	3.13545	8.15512	5.73176	0.735846	0	0.632163	0.0465116	1.24212	0.375589	0.451437	31.2435	1.38945	0.267404	0	0.139959	0	0.0551724	0.877578	0.11385	14.7722	0.350163	0.643835	7.96537	0.0617384	0
FBgn0002441	l(3)mbt	66.0521	82.6053	68.7811	53.1359	54.3286	99.1738	77.9068	63.3483	60.9707	92.7498	69.5524	52.2857	44.8972	69.3771	64.661	58.4985	56.0276	76.2518	73.035	63.9383	69.0696	56.416	77.3553	47.7238	53.1607
FBgn0002466	sti	0.498307	0.721201	0.907528	0.61966	0.422462	0.682736	0.0465116	0.365331	0.469487	0.861835	0.458789	0.241644	0.58829	0.448366	0.373223	0.469868	0.386207	0.390035	0.683102	0.350959	0.525244	0.321917	0.634059	0.308692	0.68222
FBgn0002521	pho	62.4157	71.5654	70.7872	72.6939	64.6367	70.5747	70.4185	79.7638	60.6577	53.0234	60.0096	58.3268	54.5505	72.9939	52.1113	59.4089	66.1793	60.0653	68.5948	64.5126	38.3428	78.4137	58.1353	52.6938	39.5163
FBgn0002522	lab	3.09539	3.68922	3.00917	2.67228	2.32354	5.28488	1.25581	3.09313	4.82006	2.87278	2.3857	2.80911	3.66344	3.3478	2.79918	2.64301	3.11724	2.82775	4.21246	4.40293	3.67671	2.44121	3.20993	2.31519	1.41692
FBgn0002524	lace	37.6785	41.9129	38.4028	36.1727	33.459	31.6082	32.4186	33.9514	31.2365	55.6089	48.1269	29.6014	26.2591	46.63	41.8477	42.2881	41.931	32.5191	38.5668	41.5407	37.0735	39.1934	38.9154	36.2096	28.8107
FBgn0002525	Lam	44.6486	65.6571	49.0543	41.1687	39.0355	70.4735	40.465	40.4543	38.404	59.9591	43.8602	32.2595	35.8322	50.9642	47.9592	33.3312	35.2552	46.6579	56.3844	32.6072	35.6728	46.3025	62.1775	31.5792	36.0527
FBgn0002526	LanA	15.3718	5.51997	6.40046	10.9215	8.95619	4.14699	3.76744	8.06163	4.85136	28.5637	29.4084	18.7576	15.4292	16.8585	18.6145	22.0251	20.1104	11.9936	11.3281	23.0356	25.6057	12.8499	13.5927	26.0845	22.0409
FBgn0002531	Lcp1	0.0486713	0.0277385	0	0.271101	0.0422462	0.0252865	0	0.0487107	0	0.123119	0	0.0906165	0	0.0597821	0	0.0587335	0.0275862	0	0	0.191432	0.0875407	0	0	0.0617384	0.0524784
FBgn0002533	Lcp2	0.00352052	0	0	0	0.0844924	0	0	0	0	0	0	0	0	0	0	0	0	0	0	0	0	0	0	0	0
FBgn0002534	Lcp3	0.328328	0.74894	0.62094	0.154915	0.168985	0.682736	0.325581	0.194843	1.06417	0.410397	0.504668	0.422877	0.267404	0.29891	0.0466529	0.146834	0.303448	0.390035	0.512327	0.127621	0.262622	0.0268265	0.198144	0	0
FBgn0002535	Lcp4	0.110856	0.74894	0.286588	0.30983	0.0422462	0.0505731	0	0.146132	0	0.410397	0.0458789	0.120822	0	0	0.0466529	0	0	0	0.0284626	0.0638106	0	0.0268265	0	0.123477	0.209914
FBgn0002542	lds	2.28527	3.05124	1.09859	3.87288	3.80216	2.6298	0.744185	1.46132	0.71988	5.00685	4.90904	2.50706	2.00553	1.76357	2.70587	2.29061	1.57241	2.779	2.07777	1.91432	1.83835	1.47545	1.50589	1.69781	1.41692
FBgn0002543	robo2	14.1083	18.4461	10.9381	11.7348	13.0118	22.9602	13.3953	16.9513	11.7059	20.602	15.0483	10.4511	5.29461	13.9292	11.15	12.9507	13.3793	16.1864	16.2806	12.475	14.0941	12.5548	21.558	10.9586	12.5423
FBgn0002552	lin	16.0409	17.7804	14.3294	16.5372	15.5466	20.9372	12.8837	12.5917	9.54623	23.8441	20.462	12.8373	11.2845	16.3504	17.9147	16.2985	16.1931	17.8441	17.5614	15.9527	16.195	14.6741	21.7562	13.1194	12.5423
FBgn0002561	l(1)sc	0.00101481	0	0	0	0	0	0	0.0243554	0	0	0	0	0	0	0	0	0	0	0	0	0	0	0	0	0
FBgn0002562	Lsp1alpha	0.521784	0.0277385	0	0.232373	0.211231	0	0	3.58024	3.91239	0	0.0458789	0.664521	0.106962	0	0.32657	0.0587335	0	0	0.0284626	0	0	0.751141	0.0792574	2.12998	0.367349
FBgn0002563	Lsp1beta	80.7576	2.21908	3.86894	70.8736	99.1518	5.84119	8.18603	729.711	907.674	0.861835	13.7178	8.75959	15.2421	1.70379	2.75252	25.5491	24.9931	1.7064	0.512327	5.20057	3.32655	1.55593	1.30775	2.46954	0.99709
FBgn0002564	Lsp1gamma	0.444801	0.443816	1.14635	0.193644	0.168985	0	0	0.146132	0.0625982	0	0.458789	0.60411	0.213924	0.717385	0.699794	0.323034	0.468966	0.926332	0.227701	2.20147	0.175081	0.670661	0.554802	0.0617384	0.209914
FBgn0002565	Lsp2	272.268	1.41466	3.86894	153.521	538.808	0.328725	1.44186	73.261	100.345	26.6348	111.623	871.187	467.61	1.55433	2.00608	1183.57	350.648	1.56014	0.597714	64.5126	268.794	1.01941	0.990718	1683.48	625.648
FBgn0002566	lt	56.8415	78.611	66.775	59.7585	58.0885	75.0504	65.1627	56.9672	50.7672	69.7265	60.1931	51.0775	47.8119	53.9533	44.6002	50.0997	51.9448	58.4077	58.5475	50.8571	35.0163	68.1124	58.3335	49.3599	44.974
FBgn0002567	Rab32	217.396	188.095	130.923	223.581	214.273	98.7186	117.256	255.22	250.268	172.818	234.349	247.413	195.232	116.904	80.0098	217.255	199.145	176.393	104.458	443.388	454.511	216.114	250.572	312.335	318.282
FBgn0002569	Mal-A2	0.393482	0.138693	0	0.30983	0.253477	0.101146	0	0.0730661	0	1.51847	0.917577	0.392671	0.133702	0.687494	0.373223	0.205567	0.331035	0.68256	0.796952	0.446674	0.262622	0.321917	0.752946	0.586515	0.157435
FBgn0002570	Mal-A1	3.79713	2.57968	1.91059	4.80237	6.75939	1.44133	1.81395	1.51003	1.62755	7.42819	8.2582	2.29562	1.2568	3.28801	3.82554	6.16701	3.44828	3.02277	3.41551	4.27531	4.50835	2.49486	3.7251	6.08124	5.19536
FBgn0002571	Mal-A3	0.0957794	0.277385	0.286588	0.116186	0.0844924	0	0	0.0243554	0	0.369358	0.0917577	0.120822	0	0.119564	0	0.0881002	0.0551724	0	0	0.095716	0.175081	0	0.0792574	0	0.314871
FBgn0002573	sens	0.537256	0.610247	0.0477646	0.774575	0.718185	0.328725	0	0.487107	0.532085	0.861835	0.321152	0.513493	0.61503	0.388583	0.186612	1.02784	0.744828	0.390035	0.0853878	0.893349	1.22557	0.295091	0.435916	0.833469	0.577263
FBgn0002576	lz	11.892	15.173	12.5143	18.0476	20.9964	6.54921	5.67441	9.81521	9.95312	14.2818	13.259	17.6098	11.7391	10.7608	10.4503	9.95532	10.4	11.6035	10.3888	12.124	14.3567	9.79166	10.6205	9.47685	9.86595
FBgn0002577	m	0.289561	0.416078	0.0955293	0.30983	0.0844924	0.0505731	0	0.146132	0	0.0820795	0.367031	0.181233	0.213924	0.209237	0.513182	0.675435	0.606897	0.438789	0.284626	0.510485	0.656555	0.241438	0.118886	0.432169	0.314871
FBgn0002578	Kaz-m1	0.0884176	0.138693	0	0.0774575	0.337969	0.227579	0	0.0730661	0	0.164159	0.137637	0.181233	0.0802213	0.029891	0.0933059	0.0587335	0.110345	0	0.0569252	0.0638106	0.0875407	0.0804794	0.0396287	0.0308692	0.0524784
FBgn0002579	RpL36	783.418	331.891	719.717	878.911	958.143	399.173	1444.97	571.328	1046.89	350.849	629.091	709.648	786.918	516.846	1072.55	815.955	836.166	745.795	680.199	720.231	1058.76	508.066	687.083	1088.42	1244.42
FBgn0002590	RpS5a	638.366	386.98	488.059	870.39	934.232	481.86	638.929	457.126	625.607	445.322	569.678	644.645	623.801	398.896	760.629	748.059	738.124	512.262	620.2	639.287	922.416	335.572	508.753	997.323	972.635
FBgn0002592	E(spl)m2-BFM	1.41825	1.63657	2.38823	1.97517	1.22514	0.885028	0	0.925504	0.68858	0.451437	1.10109	1.38945	2.70078	0.956513	1.16632	1.26277	1.57241	2.2427	0.939265	1.69098	2.75753	1.60959	1.46626	1.32738	1.67931
FBgn0002593	RpLP1	1116.35	629.72	977.742	1584.35	1784.69	753.286	1579.07	680.489	1192.03	658.893	820.911	1016.75	1198.93	668.603	1593.29	1103.63	1174.98	1013.02	1142.6	880.491	1388.48	585.407	1011.88	1508.86	1844.25
FBgn0002609	E(spl)m3-HLH	1.56858	1.52562	2.05388	2.86593	2.49252	0.758596	2.88372	1.77794	1.34586	0.820795	1.55988	1.32904	2.03227	0.627712	0.699794	0.998469	0.855173	1.31637	0.370014	1.65908	0.919177	1.87785	2.06069	1.66694	3.14871
FBgn0002622	RpS3	897.019	533.328	748.711	1192.69	1186.65	624.805	1004.04	678.419	1026.45	520.138	717.821	843.669	759.402	620.807	1201.69	1031.27	1017.41	727.073	837.312	775.65	1257.3	566.441	817.62	1339.54	1500.2
FBgn0002626	RpL32	774.326	461.957	686.234	1002.77	1107.74	751.313	1130.46	445.338	794.778	614.816	618.906	688.776	726.939	476.852	1183.44	805.588	792.304	758.032	813.688	539.296	938.655	381.901	637.23	1052.33	1174.47
FBgn0002629	E(spl)m4-BFM	0.0203003	0	0.0477646	0	0	0.354011	0	0.0243554	0	0	0	0.0302055	0	0	0	0	0	0	0	0	0	0	0	0.0308692	0
FBgn0002631	E(spl)m5-HLH	0.0327289	0.0277385	0	0	0	0.303438	0	0.146132	0.250393	0	0	0.0302055	0	0	0	0	0.0275862	0	0	0	0	0	0	0	0
FBgn0002632	E(spl)m6-BFM	0.181709	0.138693	0.286588	0.0387288	0.168985	0.531017	1.44186	0.170488	0.156496	0.123119	0.0917577	0.241644	0	0	0.139959	0.0293667	0.0827587	0.0975086	0.11385	0.0638106	0.0875407	0.107306	0.0396287	0	0.209914
FBgn0002633	E(spl)m7-HLH	0.128508	0.19417	0.143294	0.271101	0.0422462	0.354011	0	0.0730661	0.0938973	0	0.137637	0.422877	0.187183	0.0597821	0.186612	0.0881002	0	0	0.0569252	0.127621	0.350163	0.0536529	0.158515	0.0308692	0.0524784
FBgn0002638	Rcc1	33.2858	36.3375	42.2239	25.7934	25.8124	46.9824	45.3022	28.9098	39.5934	36.9358	36.9325	26.309	21.2319	30.9073	38.3954	26.8999	25.5724	37.3946	39.1361	27.4705	29.8076	33.855	38.9947	26.7327	31.3296
FBgn0002641	mal	12.3106	11.5115	11.0814	11.6961	11.6599	14.5398	10.6511	11.2522	12.3944	13.5842	16.287	8.85021	9.57308	14.1684	13.1561	12.2459	11.0345	12.7249	17.6753	12.9855	12.9123	10.0063	13.9889	11.9773	9.4986
FBgn0002643	mam	121.07	207.512	130.732	112.546	104.559	152.275	96.3254	123.677	84.3198	163.543	132.544	131.092	131.189	139.92	84.0219	97.5269	101.324	131.978	116.469	119.166	85.8774	145.855	133.945	86.0325	93.2542
FBgn0002645	Map205	51.3132	24.826	21.3508	45.545	40.3873	56.1614	41.8604	66.0518	41.0331	44.6512	36.0608	50.0505	38.6934	69.8852	49.5921	67.8078	72.4414	57.7251	66.7163	68.3731	44.9959	63.9006	55.7576	59.948	47.7029
FBgn0002673	twe	2.07605	2.71837	2.436	1.89771	1.56311	3.26196	4.46511	1.55874	1.62755	2.17511	2.01867	1.20822	1.47072	3.01899	2.23934	1.3215	1.24138	2.09644	2.36239	0.701917	0.919177	2.89726	3.09104	1.69781	1.83675
FBgn0002707	mei-9	6.70045	8.95954	7.26022	6.1966	9.08293	11.5559	3.25581	6.45417	5.69644	8.45419	5.41371	3.02055	4.06455	9.50535	8.25757	5.19791	5.4069	5.99678	8.25415	5.58343	7.00326	7.59189	9.51089	4.25995	4.82802
FBgn0002709	mei-218	0.378019	0.138693	0.907528	0.426016	0.168985	0.303438	2.4186	0.194843	0.125196	0.205199	0.137637	0.241644	0.534809	0.29891	1.02636	0.1762	0.331035	0.195017	0.370014	0.191432	0.131311	0.214612	0.118886	0.216085	0
FBgn0002715	mei-S332	3.84644	5.85283	5.92281	2.94339	2.45028	5.31017	7.02324	3.02007	4.66357	3.89878	3.53267	2.80911	2.56708	4.0054	5.83162	1.99694	2.51035	3.85159	4.24093	3.25434	2.8013	4.10445	5.62728	1.94476	2.15162
FBgn0002716	mei-W68	1.45395	2.21908	0.859763	0.968219	0.844924	1.97235	4.0465	2.19198	1.18937	1.39535	0.779941	1.17801	0.347626	1.61412	1.39959	1.02784	0.662069	1.65765	1.67929	1.75479	1.44442	1.9315	1.34738	1.01868	1.36444
FBgn0002719	Men	295.603	244.21	235.336	449.718	428.25	219.639	200.651	314.184	392.053	161.573	173.835	249.286	194.51	197.371	215.63	355.103	326.428	177.417	202.568	299.75	429.168	214.665	288.893	658.749	465.484
FBgn0002723	Met	61.7774	104.269	54.2129	49.9601	49.0901	122.943	49.1627	80.1535	48.1693	89.4256	50.742	63.3711	49.3629	71.589	57.1032	45.166	49.4897	76.1542	65.6916	50.889	39.5684	72.2705	60.9093	37.9383	45.0265
FBgn0002732	E(spl)malpha-BFM	0.357771	0.277385	0.191059	0.30983	0.253477	0.303438	0	0.121777	0.250393	0.123119	0.275273	0.0302055	0.401107	0.597821	0.606488	0.293667	0.634483	1.07259	1.28082	0.287148	0.306392	0.241438	0.237772	0.123477	0.367349
FBgn0002733	E(spl)mbeta-HLH	6.34522	8.2106	7.06917	5.49948	5.0273	6.62507	0.0930231	4.40832	5.22695	6.27908	7.52414	7.85343	5.80268	5.82875	8.16426	4.22881	5.71035	8.09322	8.76648	9.02921	7.74735	3.80936	5.31025	6.63688	9.34116
FBgn0002734	E(spl)mdelta-HLH	0.0329786	0	0	0	0.0422462	0.101146	0	0.121777	0	0	0	0.0302055	0.106962	0.029891	0	0.0293667	0.0551724	0	0.0569252	0.0319053	0	0.0536529	0.0396287	0.0926077	0
FBgn0002735	E(spl)mgamma-HLH	0.00984348	0	0.0477646	0	0	0	0	0.0243554	0.0312991	0	0	0	0.0267404	0	0	0	0	0	0	0	0	0.0268265	0.0792574	0	0
FBgn0002736	mago	19.8848	16.6154	24.9331	17.8152	19.0108	35.0471	27.2093	23.0889	31.7686	18.7552	17.9386	14.3476	11.6588	16.4401	25.8924	16.6216	17.4621	15.9427	20.9769	14.2298	15.8449	17.3031	22.7865	16.9163	18.6298
FBgn0002772	Mlc1	308.3	226.901	270.778	311.069	226.946	198.12	287.813	185.905	195.619	283.133	297.708	440.547	531.44	151.637	186.892	139.903	159.669	329.579	191.041	903.973	795.833	246.186	270.743	265.383	302.381
FBgn0002773	Mlc2	897.34	656.737	736.101	1048.81	820.717	621.037	790.371	656.231	700.255	651.301	833.573	1185.5	1415.13	383.024	415.304	428.96	513.517	734.435	503.788	2404.35	2572.52	720.424	909.4	948.21	886.466
FBgn0002774	mle	108.693	145.932	103.936	94.7693	96.0678	161.631	120.79	116.175	103.162	142.285	103.411	82.4308	78.2693	122.643	96.5716	100.552	98.869	120.959	120.511	106.181	91.0861	121.685	129.11	77.7596	73.8372
FBgn0002775	msl-3	21.6382	27.4889	26.6527	14.7557	14.6594	29.8634	24.4186	21.5058	27.9501	26.2654	21.1043	16.311	15.8838	21.2824	23.1399	16.8271	16.6345	23.0608	24.9901	19.0156	19.6091	26.7996	24.7679	16.5459	19.7844
FBgn0002778	mnd	37.0394	56.6698	49.1976	44.7704	47.4002	34.592	24.5581	48.2723	42.3477	26.7579	26.4262	26.4902	23.2642	41.7578	36.4359	43.962	38.5379	42.0262	43.0639	42.466	34.3597	29.7774	28.1364	28.7084	28.9681
FBgn0002780	mod	74.1118	86.5442	83.2537	92.3681	87.6186	89.2362	87.3487	71.1177	84.5702	68.4133	65.2856	56.3332	52.8926	63.8771	66.5271	74.7971	71.4483	71.4251	68.5379	73.3822	67.6252	63.9274	65.0704	90.0455	77.0383
FBgn0002781	mod(mdg4)	184.761	242.24	206.964	144.381	144.313	258.1	242.325	172.631	197.685	230.11	188.333	138.613	140.762	198.746	211.944	135.146	160.11	176.052	204.02	150.689	164.839	181.4	260.757	124.526	159.587
FBgn0002783	mor	92.3943	113.145	100.927	76.1795	74.142	141.883	91.4882	84.5862	82.8487	125.992	99.7407	69.2914	66.3163	108.325	100.817	77.8219	77.0483	92.1944	111.829	72.0741	82.8135	100.546	127.961	64.2389	75.2541
FBgn0002787	Rpn8	109.055	165.1	152.847	77.8061	78.8736	115.812	112.372	82.516	100.658	113.023	190.168	77.7791	75.4348	90.809	127.083	92.3878	87.2828	111.501	106.507	127.079	107.412	93.8121	135.847	94.3363	100.864
FBgn0002789	Mp20	165.416	188.566	155.235	175.054	162.31	167.169	178.046	131.933	171.613	132.025	252.013	159.817	199.805	107.727	143.551	100.111	112.662	132.953	126.431	157.644	165.583	173.674	241.775	197.563	236.73
FBgn0002791	mr	21.0816	24.1325	28.3244	17.1181	16.983	39.801	33.6744	20.6534	22.8796	29.3434	22.8018	14.8611	16.4454	18.921	20.1541	16.1517	16.2483	22.1832	20.8346	16.176	16.764	20.5222	21.558	13.7368	15.6911
FBgn0002838	ms(3)K81	0	0	0	0	0	0	0	0	0	0	0	0	0	0	0	0	0	0	0	0	0	0	0	0	0
FBgn0002842	sa	0.0053927	0	0	0	0	0.0252865	0	0	0	0	0	0	0	0	0	0	0	0	0.0284626	0.0319053	0.0437704	0	0	0	0
FBgn0002855	Acp26Aa	0.0260727	0.055477	0	0	0	0	0	0.0974215	0	0.123119	0.0458789	0.060411	0.0802213	0	0	0	0	0	0	0.0319053	0.131311	0	0	0	0
FBgn0002856	Acp26Ab	0.00493146	0.0277385	0	0	0	0	0	0	0	0	0	0.0906165	0	0	0	0	0	0	0	0	0	0	0	0	0
FBgn0002862	Mst87F	0.105509	0.0832156	0	0.116186	0.0422462	0.0252865	0.372092	0.121777	0	0.0410397	0.229394	0	0.0267404	0.029891	0.139959	0.117467	0.0551724	0.0975086	0.313088	0.319053	0	0.0804794	0.198144	0.123477	0
FBgn0002863	Acp95EF	0.0397636	0.0277385	0	0.0387288	0	0.0252865	0	0.0487107	0	0	0.0458789	0	0	0.0896731	0	0	0	0.146263	0.11385	0.0638106	0	0.134132	0.158515	0.0617384	0
FBgn0002865	Mst98Ca	0.0488312	0.166431	0	0	0	0.101146	0	0.121777	0	0	0.321152	0.151027	0	0	0	0	0.0551724	0	0	0.255243	0	0	0	0	0
FBgn0002868	MtnA	314.861	184.517	420.806	432.019	422.589	13.3766	42.1395	33.5861	66.761	424.884	522.56	589.188	784.966	352.684	523.772	252.348	258.593	338.404	319.094	181.031	227.65	223.679	269.673	321.534	350.818
FBgn0002869	MtnB	0.12725	0.0832156	0.0477646	0.116186	0.0844924	0.0505731	0	0	0.187795	0.328318	0.0458789	0	0.0267404	0.119564	0.0933059	0.0881002	0.0275862	0.292526	0.170776	0.287148	0.612785	0.268265	0.0396287	0.0308692	0.0524784
FBgn0002872	mu2	10.9705	14.8401	11.8456	8.71397	8.19576	16.7144	10.9302	9.86392	11.0799	18.2627	14.7271	6.79623	7.48732	12.3749	10.7302	7.16548	8.19311	14.8213	17.0491	9.15683	8.44768	11.1062	13.0775	5.83428	5.87758
FBgn0002873	mud	0.470722	0.277385	0.191059	0.503474	0.464708	0.632163	0.930231	0.730661	0.219094	0.656636	0.321152	0.211438	0.294145	0.29891	0.139959	0.293667	0.358621	0.828823	0.626177	0.606201	0.656555	0.429223	0.713317	0.493908	0.419827
FBgn0002878	mus101	8.13617	11.4837	7.69011	7.12609	7.39308	9.002	12.4186	4.67623	3.81849	11.2039	7.47826	5.5276	2.21946	9.56513	9.79711	7.16548	6.2069	10.2872	11.442	7.1787	7.57227	9.44291	13.8701	6.14298	6.5598
FBgn0002887	mus201	17.4802	20.5542	18.5804	12.3157	10.2236	27.36	29.2093	14.1748	17.1206	31.1902	24.637	11.4781	14.0387	18.652	19.4543	13.1857	12.7172	24.8159	19.6392	12.9536	11.1177	15.5325	19.4973	9.84728	11.2304
FBgn0002891	PolZ1	13.1333	13.1758	9.88728	8.55906	9.29416	17.7764	21.6744	9.54731	9.76532	20.5199	16.9293	7.58158	6.79207	14.8558	18.2413	8.72192	10.0966	20.2818	22.03	12.6664	13.4813	11.2939	17.2385	7.28514	7.50442
FBgn0002899	mus301	1.69655	1.60883	1.71953	1.82025	0.5492	1.79534	1.48837	1.55874	2.03444	1.39535	2.47746	1.29884	0.935916	1.73368	2.75252	1.6739	1.65517	1.60889	2.04931	2.61624	1.13803	2.41438	2.17958	1.11129	1.10205
FBgn0002901	mus304	3.6531	5.49223	3.67788	3.40813	2.99948	5.58832	4.69767	3.58024	3.4742	4.06293	4.90904	2.71849	3.44952	4.12496	3.82554	3.08351	2.73104	3.12028	3.21627	3.25434	2.93261	3.46061	5.27062	2.12998	2.46649
FBgn0002905	PolQ	7.58102	13.4254	9.93504	7.12609	6.50591	15.3995	9.34882	9.40117	8.88895	8.70043	7.06535	4.77247	3.98433	7.47276	7.60443	4.31691	5.18621	6.92311	8.02645	4.27531	4.33327	7.45775	10.6601	5.30951	5.82511
FBgn0002906	Blm	10.2751	23.3558	18.2939	14.2522	13.4765	15.2731	11.3023	8.64616	7.82478	11.2449	8.71699	5.67863	5.69571	9.08688	9.75046	7.34168	6.95173	9.84837	11.7266	8.55063	8.66653	8.79908	10.4224	5.55646	6.13998
FBgn0002917	na	244.253	396.799	267.386	194.883	189.305	444.841	296.232	317.545	258.875	358.441	277.2	233.398	229.273	317.981	262.236	188.769	205.324	182.975	180.538	173.693	157.092	213.753	248.71	120.822	145.995
FBgn0002921	Atpalpha	3966.03	5332.9	3882.69	3595.46	3262.04	4564.45	3149.25	4596.1	4064.94	4422.48	3577.73	4258.19	4496.08	3985.85	2676.85	3548.97	3803.45	4151.48	3516.67	5310.23	3837.39	4859.91	3612.87	3266.89	3411.78
FBgn0002922	nau	1.12943	1.38693	1.43294	1.00695	1.35188	0.505731	0	1.33955	1.15807	1.96991	1.14697	1.75192	2.13924	0.956513	0.653141	0.587335	1.54483	1.02384	0.825415	1.08478	1.00672	1.20719	0.871832	0.895208	1.25948
FBgn0002924	ncd	6.49431	6.26891	6.92587	3.33067	2.99948	11.3284	11.907	8.11034	8.20037	6.85364	5.32195	2.83932	3.18211	6.9945	8.58414	5.49158	7.08966	7.16688	9.10803	7.7849	7.61604	4.42636	5.07248	2.96345	6.29741
FBgn0002926	ndl	0.0204022	0.055477	0	0	0	0.0252865	0	0.0243554	0	0	0.183515	0.0302055	0	0	0	0.0293667	0	0	0.0569252	0	0	0.0536529	0	0.0308692	0
FBgn0002930	nec	150.869	67.1827	76.71	167.657	154.621	55.6304	56.372	86.559	119.25	261.054	304.59	131.484	117.177	100.494	143.738	242.158	252.773	107.113	135.368	168.652	284.376	51.8824	76.7608	254.332	204.928
FBgn0002931	net	2.22943	1.38693	1.81506	2.51737	1.60535	1.77006	4.46511	1.99714	0.970272	2.05199	2.29394	1.41966	1.87183	2.24183	3.77889	3.02477	3.06207	2.63273	3.01703	2.58433	2.53868	1.63641	1.70403	1.91389	1.207
FBgn0002932	neur	13.4025	13.6196	13.7084	16.0724	15.9268	12.3651	11.7674	14.9298	13.4586	13.9535	12.892	12.4145	7.46058	14.1982	12.0831	13.5087	14.4552	13.7487	13.349	14.2936	11.6867	15.7471	16.0496	13.212	10.7581
FBgn0002933	ng1	0.0139684	0.0277385	0	0	0	0.126433	0	0	0	0	0	0	0	0.0896731	0	0	0.0275862	0	0	0.0638106	0	0	0	0	0
FBgn0002936	ninaA	241.142	97.0016	137.18	212.543	255.927	85.873	223.302	380.09	533.775	254.816	272.888	318.91	276.924	145.569	258.877	246.387	264.883	170.933	150.681	245.926	278.773	141.402	172.266	295.912	366.562
FBgn0002937	ninaB	108.282	65.5184	54.4517	111.81	128.597	37.0448	64.372	136.414	110.267	75.4721	77.26	116.321	105.705	70.6325	54.6772	180.429	168.193	79.7621	81.4884	151.104	198.367	70.6877	76.959	185.431	197.791
FBgn0002938	ninaC	3396.95	2970.88	2464.37	4263.49	3859.27	1534.77	1749.39	3623.08	3852.42	2527.97	2728.42	3112.86	2239.35	2955.69	2303.39	4893.79	5003.34	2655.55	2318.22	6584.78	6421.33	3093.63	3109.35	3499.83	3761.6
FBgn0002939	ninaD	8.24675	7.32297	4.77646	12.8579	12.2091	0.455157	0.511627	5.33383	5.41475	2.70862	7.43238	5.19534	5.10742	2.24183	2.05273	15.0945	11.8069	1.36512	1.05312	8.29538	7.17834	6.492	7.48983	37.1357	28.3908
FBgn0002940	ninaE	29680.3	21027.8	24767.6	27415.2	27407	13282.4	17383.2	33798.8	44287.6	23138.7	26443.1	26964.6	26032.7	39265.6	45308.2	38081.2	39454	19884.1	26729.2	24324.6	29871.4	32126.2	40456.2	29285.7	35592.1
FBgn0002941	slou	11.5994	19.8608	12.8487	5.9255	5.23853	21.266	21.5348	10.8381	15.3053	15.1847	14.1766	8.75959	7.48732	11.9863	13.3894	6.07891	7.06207	11.701	11.8974	7.24251	9.67325	11.0525	17.397	5.18603	7.2945
FBgn0002945	nkd	26.8067	44.5481	20.9209	30.7506	26.7418	28.3715	15.6279	21.0187	17.2145	33.3653	23.7653	27.638	23.5851	32.1628	22.3468	28.8088	29.0207	27.5949	30.5688	29.0977	24.7303	27.4435	31.5445	25.1893	21.3062
FBgn0002948	nod	5.87817	6.71272	6.68705	3.21449	2.78825	9.10315	7.2558	4.45703	6.38502	6.52532	8.44171	3.05075	3.87736	7.11407	7.51112	4.90425	4.96552	8.19073	9.22188	3.79673	4.02687	5.63356	8.79758	3.79691	4.6181
FBgn0002962	nos	0.0709783	0.0277385	0	0.580931	0.337969	0.455157	0	0.0243554	0	0.0820795	0	0	0	0	0.139959	0	0	0	0.0284626	0	0	0.0268265	0	0	0
FBgn0002973	numb	80.2768	91.1488	77.2832	112.004	97.3774	72.4206	65.3022	105.922	82.1602	78.8784	68.2219	79.38	66.6639	67.5537	53.8375	82.4031	81.7104	57.2863	65.2647	89.8773	79.1806	94.4023	89.9176	88.4712	79.9771
FBgn0002985	odd	2.55947	3.0235	2.62705	2.285	1.81659	3.08496	1.76744	1.70488	1.81535	2.7907	4.08322	1.6613	2.56708	2.6603	2.3793	2.78984	2.56552	2.29145	2.98857	2.68005	2.40737	2.30707	3.4477	2.90171	2.78136
FBgn0002989	okr	6.47195	7.32297	5.20634	5.49948	4.77382	12.1375	5.30232	6.38111	5.82163	7.83859	7.52414	4.83288	4.33195	7.20374	7.2312	6.84245	6.2069	7.84945	6.51793	6.28535	6.91572	5.76769	7.56909	6.08124	3.8834
FBgn0003002	opa	4.60823	5.46449	4.68093	3.40813	3.50643	4.55157	5.16278	3.72637	4.63227	5.9918	4.17498	4.13815	4.27847	4.78257	4.71195	4.25818	3.72414	4.43664	6.91641	4.72199	3.5454	4.48002	5.94431	4.32169	5.03793
FBgn0003008	or	18.1415	21.5806	23.1181	19.7517	17.6589	16.9925	31.5348	21.1892	22.8171	15.3489	15.5071	17.2473	18.1033	15.1249	17.4482	16.5335	15.6966	19.453	16.0529	15.7612	15.2321	13.9229	17.1196	15.6198	16.5832
FBgn0003009	ord	0.0076018	0	0	0	0	0.0758596	0	0	0	0	0	0	0	0	0	0.0293667	0	0.0487543	0.0284626	0	0	0	0	0	0
FBgn0003011	ort	23.0455	28.0991	26.3183	19.132	17.0252	17.0684	17.3488	15.2221	15.274	28.3174	30.4177	22.1406	25.5906	22.2987	24.4928	18.501	18.6759	21.2569	21.9731	23.9609	17.9021	31.843	32.4559	27.8132	29.9652
FBgn0003015	osk	0.00836161	0	0	0.116186	0.0844924	0	0	0	0	0	0	0	0	0	0	0	0	0	0	0	0	0	0	0	0
FBgn0003016	osp	78.3235	114.089	67.8258	84.8547	84.9993	80.2594	36.8837	85.804	67.1366	85.9783	65.6985	71.5266	59.7382	86.0862	66.3405	86.6612	88.9104	85.6613	73.6042	89.4944	91.2174	82.1158	83.1411	69.0545	72.6826
FBgn0003023	otu	0.358414	0.55477	0.334352	1.04568	0.380216	0.58159	0.0930231	0.63324	0.250393	0.656636	0.41291	0.483288	0.213924	0.179346	0.139959	0.146834	0.275862	0.0975086	0.540789	0.223337	0.350163	0.268265	0.0792574	0.555646	0.104957
FBgn0003028	ovo	11.8356	9.32014	10.6515	12.6643	11.7444	7.35838	8.79068	10.9599	7.60568	8.90562	8.94638	16.3714	20.403	12.7934	8.30422	15.5644	12.4966	11.6523	11.4989	14.8998	11.249	11.8036	8.44092	13.3664	18.2625
FBgn0003034	SP	0.0111383	0.0277385	0	0	0	0.0505731	0	0	0.125196	0	0	0	0	0	0	0	0	0	0	0.0638106	0	0	0	0	0
FBgn0003041	pbl	13.84	18.5293	15.9056	17.1956	14.7862	12.3904	11.8604	15.3439	15.2427	14.9795	12.1579	12.5655	10.5625	13.7499	12.0365	13.5968	12.5241	14.1875	13.1497	15.0593	11.9055	12.2865	15.7722	13.3046	13.0671
FBgn0003042	Pc	37.2296	46.4343	43.227	29.0078	27.0376	49.1064	35.5813	38.3597	39.343	44.6102	37.6666	32.0178	32.5699	39.0975	31.8639	30.4827	33.9035	36.2732	42.4662	36.9783	29.5012	49.7362	49.2981	28.6158	30.3325
FBgn0003044	Pcl	35.0274	47.5716	35.0115	31.2928	28.5162	48.1708	28.1395	33.5617	27.4806	44.1177	35.602	26.5204	23.5851	50.2169	41.1945	33.0669	30.8966	28.9113	36.2898	29.9591	26.1309	49.1461	50.8436	26.1462	28.2859
FBgn0003046	Pcp	0.481551	0.277385	0.668705	0.154915	0.5492	0.556304	0.976743	0.243554	0.406888	0.697676	0.229394	0.513493	0.61503	0.119564	0.513182	0.1762	0.193104	0.828823	0.284626	0.797633	1.05049	0.643835	0.356658	0.493908	0.209914
FBgn0003048	pcx	40.0957	52.5645	37.1609	48.1786	42.6264	47.1847	25.3953	35.4127	25.1958	68.5364	44.4566	36.3976	32.249	45.7333	31.0708	38.9697	37.8207	49.4856	39.3638	43.1679	34.4035	41.581	44.8201	29.6653	30.8573
FBgn0003053	peb	76.0959	89.5677	71.9335	70.3314	70.3399	56.9453	33.9999	105.02	86.855	88.6048	73.4062	77.9	72.3329	80.0482	62.5616	74.1216	89.7104	71.8639	71.3842	68.2774	82.4634	82.4645	88.372	62.078	95.7207
FBgn0003057	CG10598	0.0085339	0	0	0.0774575	0	0	0	0.0487107	0	0	0	0	0	0.029891	0	0	0	0.0487543	0	0	0	0	0	0	0
FBgn0003060	CG9757	4.34912	1.99717	2.34047	0.61966	0.168985	3.99527	3.2093	0.462752	0.34429	5.70452	1.23873	0.453082	0.454588	10.9999	28.7382	0.440501	0.551724	15.4551	18.5861	2.4248	2.31983	1.15354	0.435916	0.709992	1.57435
FBgn0003062	Fib	27.4015	19.6111	23.6913	20.7973	23.6156	39.3458	33.8604	20.8969	29.0769	21.5048	25.6922	19.5429	19.9216	22.4482	37.5556	22.6711	21.7104	39.686	36.859	19.7494	27.4002	17.7323	28.176	41.1178	44.974
FBgn0003065	CG2150	0.379643	1.0818	0.764234	0.154915	0.253477	0.935601	0	0.608884	0.34429	0.0410397	0.596425	0.302055	0.0802213	0.179346	0.279918	0	0.0551724	0.68256	0.341551	1.37193	0	0.0804794	0.198144	0.339561	0.419827
FBgn0003068	per	62.7149	73.6458	59.3714	82.2599	91.3362	64.2278	37.2558	38.4571	38.5918	97.1	71.571	41.895	41.207	64.1462	67.74	29.5429	33.7379	93.2183	99.1067	88.3777	116.342	39.1666	49.8926	36.117	50.8516
FBgn0003071	Pfk	314.245	363.291	306.983	331.363	306.116	271.046	230.186	327.361	311.395	248.331	256.509	304.653	277.806	322.285	275.346	371.754	370.455	277.656	295.299	427.755	487.821	268.13	324.401	291.22	294.719
FBgn0003074	Pgi	349.122	308.452	266.431	406.342	440.923	268.29	213.721	273.803	320.002	288.386	307.801	322.987	260.987	286.147	316.68	534.475	494.428	337.624	345.934	515.973	633.051	213.565	292.658	392.348	337.909
FBgn0003076	Pgm1	255.114	136.917	162.877	339.806	396.818	140.492	194.79	176.284	243.006	250.548	414.47	324.135	258.634	133.015	186.192	368.171	332.386	202.818	174.447	282.745	457.488	117.017	142.703	393.613	293.354
FBgn0003079	Raf	51.9652	67.0163	54.4517	46.8618	40.3029	74.1907	60.9766	51.5603	58.2163	63.1191	48.7692	38.2401	40.0037	58.4071	48.0059	42.8461	45.7379	49.9244	54.9897	46.6775	42.3259	60.6278	73.5905	37.29	43.0323
FBgn0003082	phr	2.71251	1.96943	1.95835	2.05262	1.35188	2.78152	6.46511	3.14184	3.25511	2.25719	2.06455	1.84253	1.3905	3.07878	4.33872	1.64454	1.87586	3.75408	4.15554	2.29718	3.45786	2.09246	3.92324	1.85215	2.09914
FBgn0003086	Pig1	0.0100396	0	0	0	0.0844924	0	0	0	0	0	0.0458789	0	0	0	0	0	0	0	0.0569252	0	0	0.0536529	0	0	0
FBgn0003087	pim	0.160564	0.166431	0.0955293	0.154915	0.0422462	0.227579	0	0.243554	0.219094	0.0820795	0.0917577	0.151027	0.0802213	0.209237	0	0.117467	0.0551724	0.0487543	0.426939	0.0638106	0.350163	0.37557	0.435916	0.216085	0
FBgn0003089	pip	0.986399	1.02633	1.24188	0.92949	0.422462	0.986175	0.697673	1.53439	0.657281	0.533517	0.734062	0.785343	0.882435	0.358692	0.933059	0.675435	0.551724	2.2427	0.540789	4.27531	1.1818	0.536529	0.594431	0.617384	0.734698
FBgn0003090	pk	18.2658	27.683	20.9209	20.2939	20.4472	19.3948	13.8139	19.0946	17.6527	20.1505	19.5903	17.4588	15.349	21.1629	16.3285	16.4454	15.4759	16.479	17.6753	20.1004	24.5989	12.7962	17.0403	12.3168	16.1109
FBgn0003091	Pkc53E	299.653	334.721	230.13	217.927	210.006	589.859	368.883	479.557	434.15	449.426	384.419	323.229	327.009	258.378	201.027	223.892	248.083	219.346	213.925	204.992	147.725	351.453	287.506	216.455	269.582
FBgn0003093	Pkc98E	524.912	722.949	581.821	343.369	330.619	821.863	595.301	529.437	512.335	682.04	552.29	462.929	577.567	604.546	546.912	342.064	393.986	703.817	628.625	430.211	344.56	621.006	558.488	294.832	416.311
FBgn0003114	plu	0.304811	0.166431	0.191059	0.116186	0.0844924	0.0252865	2.27907	0.657595	1.40846	0.574556	0.367031	0.875959	0.508068	0	0	0.0293667	0	0	0	0.0319053	0	0	0	0	0
FBgn0003116	pn	25.9681	24.715	25.9362	26.1419	28.0937	28.3715	25.4418	31.6133	37.8719	20.3147	20.2785	22.7447	19.4136	23.8232	25.6591	34.0067	33.5173	24.8647	22.7701	25.0457	29.9827	19.4492	21.4788	25.251	26.4491
FBgn0003117	pnr	1.41268	1.19276	0.764234	1.47169	1.18289	0.379298	0	1.04728	0.594683	2.01095	2.01867	1.41966	0.855694	1.76357	1.81946	2.49617	2.23448	0.780069	1.08158	1.59527	2.05721	1.20719	1.34738	2.74736	1.83675
FBgn0003118	pnt	10.5215	10.291	8.11999	12.9741	8.95619	8.57213	6.18604	9.86392	6.29112	11.1628	8.53347	8.09507	6.20378	12.2553	11.9898	12.8626	11.2552	11.9448	13.7759	14.9955	11.7305	10.355	7.96537	13.1812	14.9564
FBgn0003124	polo	0.194469	0.138693	0.286588	0.542203	0.380216	0.303438	0	0.121777	0	0.164159	0.321152	0.181233	0.160443	0.149455	0.0933059	0.0587335	0.0827587	0.536297	0.227701	0.287148	0.131311	0.187785	0.158515	0.154346	0
FBgn0003129	Poxm	0.700767	0.471555	0.668705	1.08441	0.591447	0.252865	0	0.974215	0.0938973	0.656636	0.917577	0.694726	0.721992	0.418475	0.279918	0.704802	1.02069	1.07259	0.910803	1.2124	1.35688	0.992579	0.832203	0.679123	0.209914
FBgn0003130	Poxn	4.27893	7.54488	8.5021	2.67228	2.91499	8.67328	6.09301	3.89686	5.57124	5.04789	5.18431	2.26541	2.67404	5.11137	4.99186	2.08504	2.23448	5.26547	4.58248	2.3929	2.05721	3.40696	4.39879	1.82128	3.30614
FBgn0003132	Pp1-13C	0.433168	1.30371	0.286588	0.154915	0.253477	1.13789	0.325581	0.876793	0.0312991	0.902874	0.642304	0.392671	0.240664	0.627712	0.0466529	0.381768	0.22069	0.585052	0.227701	0.47858	0.0875407	0.509703	0.515173	0.0617384	0.104957
FBgn0003134	Pp1alpha-96A	185.509	212.56	153.516	163.397	137.934	244.925	152.465	172.533	137.466	216.074	193.746	213.07	207.238	194.322	168.37	248.384	239.393	187.509	189.162	174.394	149.87	178.235	154.116	195.279	168.246
FBgn0003137	Ppn	93.855	28.2101	19.488	64.3285	54.2441	18.9143	13.8604	48.2236	24.7889	224.159	214.025	72.3723	56.5026	108.983	140.379	133.942	144.966	51.2895	89.5433	81.5819	110.17	85.8446	124.236	175.43	167.039
FBgn0003139	PpV	30.8586	36.809	30.8082	34.1975	32.7408	34.592	32.186	34.682	36.2444	30.7798	27.3438	24.6477	24.9488	30.5785	26.8721	28.3976	30.5379	28.9601	30.7965	31.6501	29.0197	32.1113	35.9432	29.5727	26.1867
FBgn0003140	PpY-55A	0.00575964	0.0277385	0	0	0	0	0	0	0	0	0	0	0	0	0	0	0	0.0487543	0	0	0	0	0	0.0617384	0
FBgn0003141	pr	52.8216	56.1428	41.0776	43.5311	40.0071	26.1968	42.186	46.9815	61.2211	38.9878	78.04	75.0304	69.9263	43.4018	43.6205	61.0534	59.2276	50.5582	37.4283	126.154	85.4835	30.3139	35.0318	36.0244	40.0935
FBgn0003145	prd	0.0992758	0.055477	0	0.0774575	0	0.126433	0	0.170488	0.250393	0.164159	0.0458789	0.0302055	0.213924	0.358692	0	0.1762	0.0827587	0.0487543	0.0569252	0.191432	0.0437704	0	0.0396287	0.0926077	0.157435
FBgn0003149	Prm	289.463	224.238	204.958	392.167	285.542	152.402	133.209	159.235	128.545	226.375	222.421	360.382	369.713	156.569	122.417	181.31	195.504	296.426	172.711	881.097	922.11	225.423	274.072	333.449	326.836
FBgn0003159	CG2841	42.5864	38.612	30.4738	46.3971	43.3023	36.7919	18.7442	36.8984	28.5135	45.9235	32.574	49.7786	42.5708	43.4616	32.3771	52.8308	48.4966	39.1497	41.0146	61.1625	57.8644	38.8179	57.105	51.459	47.7554
FBgn0003162	Pu	158.753	146.293	115.686	164.946	142.327	60.0049	81.7673	124.553	133.71	80.7662	252.701	251.763	202.773	91.1677	79.4033	203.923	171.255	159.719	104.742	353.639	282.45	146.741	109.573	186.327	163.838
FBgn0003165	pum	546.042	788.301	552.159	304.524	291.203	820.295	487.395	491.443	387.796	852.272	729.061	552.972	740.737	654.046	602.103	351.52	386.979	789.04	743.813	406.601	357.472	586.748	528.964	294.894	404.661
FBgn0003169	put	53.9702	55.0055	61.9507	80.9818	74.0153	56.7683	49.1162	53.8741	46.2601	38.208	52.3019	46.3956	41.6081	51.2332	42.6408	57.2651	57.1586	43.8301	53.0258	58.8334	45.6525	69.6683	58.9675	56.3363	44.1868
FBgn0003174	pwn	4.97014	5.10389	3.53458	4.45381	4.90056	3.61597	0.418604	5.55302	4.25668	3.73462	3.67031	5.89007	5.56201	4.69289	4.15211	5.34475	5.76552	3.99785	5.29404	10.5288	9.54194	3.40696	5.31025	4.4143	6.13998
FBgn0003175	px	147.07	217.747	153.181	128.347	130.794	209.828	148.837	148.154	132.145	184.843	144.656	116.654	109.957	176.208	141.218	143.016	143.669	160.402	154.495	120.283	118.311	151.194	163.944	106.468	125.318
FBgn0003187	qua	0.80733	1.05406	0.907528	0.852033	0.718185	1.11261	1.72093	0.755016	0.625982	0.738715	0.550546	0.33226	0.374366	0.807058	0.7931	0.646068	0.248276	1.12135	1.39467	1.02097	0.919177	0.643835	0.832203	0.524777	0.68222
FBgn0003189	r	24.912	26.8786	21.5896	27.4587	24.2916	27.5623	31.2558	17.0731	15.0862	39.9317	44.5025	14.106	9.14523	27.1411	32.7504	31.5692	25.9862	25.9373	36.6313	17.8989	25.168	13.2791	21.0825	20.9911	20.5715
FBgn0003204	ras	124.258	140.301	144.106	141.515	149.087	118.164	117.395	115.347	132.833	103.256	110.339	113.512	92.3882	105.336	103.896	118.524	124.055	104.724	101.071	153.528	154.422	117.768	150.114	132.491	138.018
FBgn0003205	Ras85D	86.9094	97.279	99.3027	76.0633	73.7618	109.364	94.5115	80.3971	86.7924	93.7348	85.5641	66.301	60.8613	102.078	94.0056	82.1388	90.7311	84.3937	91.4218	81.6776	75.8103	104.516	109.256	75.2283	70.636
FBgn0003206	Ras64B	46.6795	51.5382	52.2067	51.6642	47.7804	54.6442	57.9999	42.8167	47.1365	48.8373	43.4014	46.8185	43.7206	43.9996	44.087	37.9125	41.9862	52.6059	48.0448	47.6985	43.639	47.6706	46.0486	38.0618	39.9886
FBgn0003209	raw	90.1233	102.993	82.9672	81.8339	71.2271	158.648	96.1394	87.1192	81.4716	107.155	90.0602	74.3055	65.7548	99.298	108.328	79.437	79.2276	103.018	120.482	72.8398	80.5812	66.0199	97.764	75.1048	81.1841
FBgn0003210	rb	87.6187	83.4929	74.8472	78.6194	74.0153	168.054	116.372	105.166	103.663	80.0275	66.9373	58.8705	59.3638	90.0318	108.655	75.3844	78.3173	103.505	98.4236	67.7988	74.9786	89.3321	101.45	74.4874	71.0558
FBgn0003218	rdgB	293.237	332.418	258.359	314.168	298.765	282.729	233.953	350.717	251.238	251.451	305.095	340.416	313.532	306.742	216.19	301.45	316.193	299.547	284.597	350.608	242.225	378.387	266.741	269.025	273.15
FBgn0003227	rec	1.48427	1.4424	1.52847	1.16186	0.929416	3.71712	1.90697	1.77794	2.22224	0.656636	0.963456	1.02699	1.76487	1.28531	0.839753	1.0572	1.02069	1.85266	1.56544	1.56336	1.00672	1.87785	1.90218	1.45085	1.10205
FBgn0003231	ref(2)P	274.479	264.265	221.485	218.508	208.907	316.233	260.93	218.37	234.399	296.43	281.972	209.203	196.836	278.614	312.575	315.751	324.166	320.121	344.739	290.849	314.359	235.751	301.852	294.492	326.678
FBgn0003248	Rh2	133.492	44.0765	66.3451	248.406	254.66	15.8547	21.7209	162.694	173.147	127.305	133.095	94.5734	88.805	125.662	149.103	179.431	164.11	103.603	118.604	115.051	113.715	110.418	85.4395	239.977	268.007
FBgn0003249	Rh3	1025.28	718.122	816.202	901.683	972.042	623.212	1055.02	1264.24	1668.71	819.112	758.24	870.854	668.27	802.963	1088.18	834.074	874.566	737.994	737.75	921.33	1023.35	1489.65	1893.94	1390.84	1676.37
FBgn0003250	Rh4	1324.77	840.255	1212.27	1213.45	1195.65	771.871	1577.3	1894.02	2444.37	1051.36	1262.49	1452.28	1220.19	1671.54	2332.46	1519.41	1577.6	1037.69	1355.47	1199.16	1459.61	766.754	1064.39	806.335	868.571
FBgn0003254	rib	0.813705	0.721201	1.05082	0.542203	0.718185	0.708023	0	0.584529	0.594683	0.738715	0.41291	0.996781	0.989396	0.807058	0.419876	0.851635	1.15862	0.926332	0.683102	1.49955	1.44442	0.938926	0.673688	0.493908	1.57435
FBgn0003255	rk	11.1503	18.0578	14.807	8.98507	9.80111	13.9582	8.69766	8.76793	8.88895	12.5582	10.9651	8.06486	5.80268	14.7961	11.2434	8.75129	9.2138	15.4551	12.8651	10.3373	11.5116	10.6501	14.3852	8.70512	10.3383
FBgn0003256	rl	43.2567	61.5795	70.1185	57.4348	50.9489	38.0562	40.372	40.3568	24.6324	31.5185	42.805	44.5833	40.699	43.611	25.6591	41.2015	43.0345	34.7131	42.8647	43.8698	24.7303	68.3001	47.4356	48.4647	31.1722
FBgn0003257	r-l	8.24277	7.65583	7.40352	7.00991	7.98453	11.3537	16.093	7.40403	8.57596	8.12587	9.81808	5.95048	5.0272	8.54884	9.23728	8.39889	7.50345	8.09322	11.4989	7.65728	9.84833	5.5799	6.85577	5.95776	6.24493
FBgn0003261	Rm62	804.901	952.236	893.055	812.258	738.463	1054.14	754.743	741.499	765.827	923.353	731.401	660.05	761.167	879.394	884.959	688.327	720.966	911.121	935.195	680.158	685.531	789.503	885.345	679.648	789.276
FBgn0003267	ro	0.326427	0.665724	0.477646	0.0774575	0.380216	0.252865	0	0.146132	0.0312991	0.738715	0.596425	0.392671	0.106962	0.29891	0.839753	0.146834	0.303448	0.633806	0.313088	0.223337	0.350163	0.214612	0.0792574	0.0926077	0.472306
FBgn0003268	rod	4.81689	7.35071	6.30493	6.93245	5.5765	6.72622	4.4186	3.55588	3.06731	6.4022	6.19365	3.44343	1.92531	5.26082	5.87827	3.31844	3.33793	5.07045	6.11946	2.52052	4.07064	5.41894	7.01428	3.17953	2.51896
FBgn0003270	amos	0.03566	0	0	0.0387288	0.0422462	0.0252865	0	0	0	0.164159	0.0917577	0.0906165	0	0	0	0	0	0	0	0.0638106	0	0.0536529	0.118886	0.0617384	0.104957
FBgn0003274	RpLP2	872.496	287.676	1005.64	1309.65	1705.1	352.317	1448.65	552.477	1065.55	278.906	686.302	697.263	708.595	477.988	1217.59	917.299	966.787	735.946	797.607	809.183	1199.4	415.139	697.426	1205.26	1402.17
FBgn0003275	Polr2F	23.1582	16.0606	35.1548	17.273	16.983	22.3786	37.5348	20.5316	24.0064	15.7593	24.1782	19.3617	25.4034	24.1818	37.9755	17.2383	17.6276	28.2287	24.7055	14.5169	18.0334	20.4686	30.0386	24.0163	24.1401
FBgn0003277	Polr2A	52.3637	61.8846	39.5969	63.5152	55.3003	65.0622	40.186	48.3211	36.307	59.5897	45.1448	40.9888	34.8963	54.9397	53.0444	57.3239	58.1793	43.5376	59.316	54.4305	60.2718	52.4189	72.5998	50.9651	48.9099
FBgn0003278	Polr1B	8.09929	10.1246	7.11693	9.06253	8.11127	13.0226	13.0697	7.57452	7.91867	12.435	7.79941	6.85665	5.29461	8.54884	7.55777	6.93055	6.28966	6.67934	8.90879	7.33822	7.48473	6.19691	8.32203	7.59383	4.1458
FBgn0003279	RpL4	1479.4	1036.7	1265.29	1791.63	2107.66	1364.03	1779.16	1054.98	1590.18	1525.94	1486.98	1141.53	1004.42	994.146	1853.66	1665.21	1713.16	1209.35	1468.3	1217.19	1997.94	784.245	1430.99	1978.69	2044.19
FBgn0003285	rst	16.8272	20.1104	13.8517	12.8192	11.9134	29.3577	23.6744	21.5545	17.058	26.881	15.8741	16.613	15.6432	17.546	16.5618	11.5999	11.669	19.0629	17.6468	16.7503	10.855	17.1421	18.8633	10.8351	9.9709
FBgn0003292	rt	11.0823	12.7042	10.5082	9.41109	7.39308	13.0478	18.9767	10.9843	9.48363	12.3119	10.9192	7.52117	8.87783	11.6276	9.6105	8.04649	8.02759	17.1615	14.3167	11.3902	10.855	13.3596	12.0868	7.59383	9.76099
FBgn0003295	ru	8.81337	13.9802	8.45434	7.47465	6.1257	10.3928	6.88371	9.91264	7.63698	7.71547	7.24886	8.85021	8.3965	9.89393	10.077	7.75282	8.82759	10.4334	10.645	10.7202	9.76079	8.39668	9.31275	5.12429	7.50442
FBgn0003300	run	5.33349	6.71272	5.97058	3.44686	2.87274	11.4801	2.60465	5.43125	6.29112	7.0178	5.27607	4.34959	5.53527	6.57603	7.1379	3.64148	4.13793	6.7281	8.25415	3.95626	4.77097	5.23116	4.95359	2.53128	3.09623
FBgn0003301	rut	237.347	314.583	205.34	227.609	215.498	282.602	178.093	220.684	161.754	508.811	481.682	281.364	289.011	284.084	178.447	173.646	174.924	221.588	244.494	200.365	156.041	217.294	232.977	121.069	124.374
FBgn0003302	rux	18.2164	23.0784	24.4077	12.1221	13.2231	24.8819	26.6046	17.4384	19.468	22.1204	19.0856	15.9787	16.3919	19.2199	25.3792	11.2181	11.7241	20.3306	21.0054	14.3255	12.387	21.0051	22.1921	11.4834	12.1225
FBgn0003308	ry	37.1922	28.9313	24.5033	53.833	47.358	28.2703	20.8372	42.8411	37.9658	31.3954	29.6378	37.485	29.0134	28.7253	35.7361	66.4569	60.8276	37.7358	40.1892	40.1688	46.2653	14.8619	19.4973	59.6393	30.4375
FBgn0003310	S	34.5939	39.3055	29.7096	46.2421	41.697	34.1874	27.6744	37.0202	27.7936	45.1848	27.665	29.3899	29.4412	35.2116	28.0851	34.6528	33.9586	34.323	34.0982	39.6902	33.0904	38.4691	37.4888	30.7149	35.1606
FBgn0003312	sad	0.453777	0.443816	0.907528	0.580931	0.844924	0.252865	0	0.31662	0.187795	0.123119	0.275273	0.271849	0.454588	0.717385	0.606488	0.499235	0.386207	0.585052	0.853878	0.574296	0.175081	0.348744	0.475545	0.432169	0.577263
FBgn0003317	sax	36.1528	45.5189	32.5277	39.2322	38.444	37.7022	30.186	37.9213	30.8922	44.1177	40.0523	31.7762	27.6496	39.8448	33.7767	35.5631	34.1242	37.3458	33.1304	34.6492	35.8042	40.2397	43.9086	32.8757	30.385
FBgn0003319	Sb	1.14256	1.91396	1.28965	1.23932	1.30963	0.455157	1.58139	1.99714	1.31456	1.19015	0.688183	1.02699	1.79161	0.747276	0.559835	1.1453	1.32414	0.536297	0.512327	2.32909	1.66327	0.643835	1.1096	0.370431	0.68222
FBgn0003321	sbr	200.416	301.296	232.327	134.234	132.357	354.644	237.069	203.221	202.881	307.059	227.88	173.289	198.387	218.145	200.328	123.605	151.697	219.394	225.054	131.386	110.958	210.722	234.998	109.555	169.505
FBgn0003326	sca	42.4295	78.4168	53.974	40.4716	37.6413	59.4486	29.9534	37.5073	33.1145	54.3777	42.8967	29.7826	32.757	49.2305	46.8395	34.1241	35.5035	48.2668	50.6919	37.4249	33.8345	44.1027	55.5991	24.8497	27.4987
FBgn0003330	Sce	31.2799	34.6177	39.8835	21.3395	21.2076	48.5754	39.3023	30.2737	33.9595	36.156	32.2987	22.8958	22.4085	39.6953	46.6529	26.8706	26.1793	34.2255	34.8951	21.8232	28.6258	26.9069	37.568	19.3241	25.0322
FBgn0003334	Scm	56.8805	67.9594	59.1804	69.247	61.1725	68.4506	42.6976	56.8211	43.6623	67.5104	51.7055	39.1765	31.6339	69.1679	58.0362	57.1183	60.7448	48.413	61.3084	55.611	57.1641	65.5639	81.5955	45.9025	45.2889
FBgn0003339	Scr	12.1802	12.9261	9.60069	13.5163	11.8289	15.6524	10.7442	12.4212	7.38659	12.0246	14.4518	9.78658	11.0171	13.3314	9.93707	13.7436	9.46207	15.6501	14.0605	14.3255	13.0873	11.9646	11.5716	13.1812	10.6531
FBgn0003345	sd	167.47	233.253	170.663	128.463	121.035	290.34	159.767	174.263	145.353	228.509	146.629	147.554	152.26	224.063	184.932	137.378	140.11	243.479	217.17	167.184	129.56	143.736	131.765	87.576	114.246
FBgn0003346	RanGAP	14.4883	14.5905	13.7084	12.5868	11.2375	13.9834	12.8837	9.49859	11.8624	22.2435	21.2419	13.8341	13.2633	16.3803	20.1074	14.5072	12.2759	22.6708	16.1098	11.5497	14.7068	11.4549	14.2663	10.8968	11.8601
FBgn0003353	sei	65.2573	87.2931	66.9182	53.5619	50.104	92.3717	97.5812	65.1506	62.7234	84.8292	65.6985	53.5241	54.0424	66.0592	60.7421	50.1878	52.7724	69.0849	68.3387	56.7596	48.5851	72.8875	88.1739	46.6743	52.1111
FBgn0003356	Jon99Cii	0.183108	0.055477	0	0.154915	0.0422462	0.126433	0	0.0243554	0.0625982	0.615596	1.65164	0.060411	0.106962	0.119564	0	0	0	0	0	0.159527	0.437704	0.107306	0	0.0926077	0.577263
FBgn0003357	Jon99Ciii	0.119078	0.0277385	0.0955293	0.232373	0.0844924	0.0758596	0	0.170488	0.125196	0.328318	0.275273	0.0302055	0	0.0597821	0.0466529	0	0.0551724	0.0487543	0.256163	0.159527	0.481474	0.107306	0	0.0926077	0.104957
FBgn0003358	Jon99Ci	0.0982711	0.0277385	0	0	0	0	0	0.0974215	0.0938973	0.0410397	0.137637	0.120822	0.187183	0.209237	0.139959	0.0587335	0	0.243772	0	0.319053	0.175081	0.0536529	0.0396287	0.308692	0.104957
FBgn0003360	sesB	3015.76	2305.93	2373.19	3089.04	2764.04	1802.63	2628.46	2971.18	3532.2	1896.04	1896.04	3357.49	3671.86	2502.66	2666.63	3699.3	4072.58	2851.2	2381.49	4902.92	5024.27	2618.32	2358.38	3143.69	3868.76
FBgn0003366	sev	82.5226	77.5292	72.0291	98.3323	101.349	91.7142	67.9999	77.6693	62.8173	128.947	89.2803	45.0666	37.2494	83.6351	95.5452	108.158	93.5173	93.462	109.097	67.8945	94.0187	57.8378	81.12	73.5922	72.6826
FBgn0003371	sgg	564.958	753.35	469.335	530.855	498.97	613.224	264.744	569.843	351.896	739.865	479.021	505.489	450.309	789.362	578.776	614.323	641.186	650.236	639.099	608.147	485.369	729.733	576.162	484.369	535.332
FBgn0003372	Sgs1	0.949702	1.16502	1.19412	0.426016	0.295723	1.03675	0.511627	1.09599	0.751179	0.697676	0.688183	1.05719	0.989396	1.88314	0.279918	0.587335	1.35172	1.65765	2.5901	1.75479	1.48819	0.429223	0.435916	0.216085	0.209914
FBgn0003373	Sgs3	0.017656	0.0277385	0	0	0	0	0	0	0	0	0	0.0302055	0	0	0	0	0	0	0.0853878	0	0	0	0.0396287	0.0308692	0.209914
FBgn0003374	Sgs4	0.109706	0.582509	0.0955293	0.0774575	0.126739	0.328725	0	0.0974215	0.250393	0	0	0.120822	0.0802213	0	0.0933059	0.0881002	0.193104	0.195017	0.0284626	0	0	0.134132	0.0792574	0.0617384	0
FBgn0003375	Sgs5	0.0122396	0	0.143294	0	0	0	0	0.0243554	0	0	0.0458789	0	0.0802213	0	0	0	0	0	0	0	0	0	0	0	0
FBgn0003377	Sgs7	0.0164574	0	0	0.0774575	0	0	0	0	0	0	0.0917577	0	0	0.029891	0	0.0587335	0	0.0975086	0	0	0	0	0.0396287	0	0
FBgn0003378	Sgs8	0	0	0	0	0	0	0	0	0	0	0	0	0	0	0	0	0	0	0	0	0	0	0	0	0
FBgn0003380	Sh	1884.89	2700.62	1871.32	779.687	762.501	3189.9	1907.44	1955.18	1571.72	2817.71	2265.91	2139	3068.68	2417.5	1847.27	1044.31	1279.42	3041.93	2398.49	1587.74	839.647	2255.11	1466.94	778.213	1251.03
FBgn0003382	sha	0.0562105	0.0277385	0	0.0774575	0.0844924	0.0252865	0	0.0730661	0.219094	0.164159	0	0	0	0.0597821	0	0	0.0551724	0	0.170776	0.095716	0.131311	0.134132	0	0.0308692	0
FBgn0003386	Shaw	117.527	187.651	127.293	93.6461	81.7464	237.744	137.349	155.704	113.052	179.877	123.598	109.374	110.545	144.703	83.6487	85.6334	85.5449	115.645	112.911	95.365	58.127	142.18	113.497	63.0041	62.8167
FBgn0003388	shd	0.797907	0.471555	0.668705	1.39424	1.0984	0.126433	0	0.170488	0.594683	0	0.321152	0.302055	0.106962	0.687494	0.279918	2.55491	2.31724	0.633806	0.939265	1.27621	1.22557	0.724314	0.515173	1.48172	1.25948
FBgn0003390	shf	11.9991	11.0122	9.36187	15.1429	13.2231	3.76769	5.48836	5.55302	5.79034	9.89058	14.3142	7.33993	8.63716	8.90753	19.1744	20.2043	21.7104	13.4074	14.829	12.0602	18.4273	4.07762	6.618	21.1454	17.8951
FBgn0003391	shg	71.4148	76.1422	69.9274	98.9133	94.7582	50.7501	32.7441	72.1406	64.0067	70.219	64.6892	57.9039	49.6035	89.165	63.4946	92.4759	95.2552	57.4813	81.3461	75.807	82.4196	74.1751	78.346	63.9919	58.1986
FBgn0003392	shi	784.912	1025.22	725.21	722.679	678.474	1021.42	671.627	939.581	697.876	972.601	783.703	748.915	667.067	902.321	589.926	702.775	714.952	778.558	696.081	947.907	686.275	992.525	927.153	596.98	648.056
FBgn0003396	shn	48.8861	54.3675	31.047	75.0951	62.5666	54.6442	33.2558	46.7623	34.1473	56.2245	48.861	43.8886	33.1047	51.293	38.8619	54.8277	52.469	56.36	58.2914	52.3247	52.5244	41.742	49.9718	42.723	47.9128
FBgn0003401	shu	0.278635	0.055477	0.477646	0.30983	0.211231	0.303438	0	0.219198	0.156496	0.328318	1.05521	0.422877	0.374366	0.29891	0.419876	0.0587335	0.137931	0.34128	0.0569252	0.54239	0.218852	0.214612	0.0792574	0.246954	0.157435
FBgn0003410	sina	58.0068	95.8643	55.407	46.552	46.9778	77.8066	58.465	57.844	44.3508	81.2997	57.3027	50.0505	44.71	63.4587	50.6184	50.2465	47.7242	67.1347	64.8378	58.8015	46.9656	69.1318	68.7558	42.0439	45.8137
FBgn0003411	sisA	0.0777353	0	0	0	0.0422462	0.101146	0	0	0	0	0	0.0302055	0	0	0	0.0881002	0	0	0	0.159527	1.44442	0	0	0	0
FBgn0003415	skd	119.605	273.002	135.413	151.003	141.736	145.398	78.7906	119.804	71.1116	137.032	102.035	110.703	102.309	143.806	91.3464	93.4156	99.8897	150.017	139.865	106.659	81.2378	134.347	119.164	69.1162	73.3124
FBgn0003416	sl	10.3058	10.6516	11.2725	16.8083	13.561	10.7215	6.41859	11.0086	7.69958	8.00275	9.63456	7.76281	4.59936	11.6276	7.04459	12.569	13.0759	10.4334	12.1251	11.9326	9.97964	11.5085	12.7604	10.5264	5.61519
FBgn0003423	slgA	400.029	476.354	393.915	387.481	370.541	498.397	459.022	523.348	449.048	402.723	331.475	300.394	262.431	402.124	307.443	385.791	405.793	357.515	333.952	452.226	417.569	470.241	493.853	340.364	378.684
FBgn0003429	slo	669.522	1057.25	814.005	477.332	484.564	1176.25	806.836	741.036	513.931	825.186	667.905	623.622	788.79	931.285	696.435	425.407	482.869	889.425	879.608	469.614	308.187	748.109	595.144	286.775	378.947
FBgn0003430	slp1	11.841	11.0399	13.7562	7.97813	7.09736	14.5903	18.6511	9.10891	12.8952	14.8564	15.0941	10.0282	10.2148	14.1385	17.8214	8.81002	9.26897	14.2363	13.9467	9.31635	8.88538	9.14782	13.7115	9.19903	10.3907
FBgn0003435	sm	324.488	599.845	341.039	321.526	297.371	469.621	298.186	374.537	232.239	336.936	310.049	324.89	349.07	403.589	288.082	243.861	279.641	359.417	346.902	276.906	162.694	436.708	305.537	197.532	231.535
FBgn0003444	smo	13.0962	13.1203	10.2694	11.6961	9.08293	14.5903	10.093	10.9843	9.95312	16.2107	14.0389	13.9549	14.4933	14.5868	13.2961	14.6246	13.5724	16.2839	16.9637	13.8788	11.7742	13.762	12.9982	12.9033	11.1779
FBgn0003447	sn	152.593	137.222	141.144	156.774	162.521	105.849	91.8138	152.879	134.586	110.479	123.827	258.348	272.057	143.836	104.829	154.41	147.89	150.261	131.07	223.688	188.606	144.675	119.441	142.029	163.995
FBgn0003448	sna	0.0954947	0.221908	0.191059	0.193644	0.0844924	0	0.232558	0.219198	0	0.0820795	0	0.0302055	0.0534809	0.269019	0.0933059	0	0.0275862	0.195017	0.0569252	0.095716	0.218852	0.0268265	0	0	0
FBgn0003449	snf	40.7024	43.0224	45.9018	27.2263	27.46	47.5387	63.0232	35.9242	49.077	51.3818	40.0981	39.2369	47.3841	37.2741	49.1722	33.5955	28.331	42.4163	40.0469	36.4997	36.7233	36.7791	44.7408	32.0731	41.9303
FBgn0003450	snk	0.021618	0.138693	0	0	0	0	0	0	0	0	0	0	0	0	0	0.0293667	0.0551724	0	0.0284626	0	0.131311	0	0	0.0308692	0.104957
FBgn0003459	stwl	10.8323	9.32014	7.40352	10.8828	10.2658	14.4892	7.30231	9.62037	8.35686	13.5842	13.3966	6.67541	6.65837	14.2879	15.6754	12.3634	13.1586	11.9936	13.0074	8.9973	6.74063	12.0183	12.483	10.0634	11.2304
FBgn0003460	so	26.1844	26.6567	21.8284	27.1876	25.6857	17.8776	15.3488	27.5459	29.4212	28.0301	22.8936	29.6316	24.6279	26.0052	22.4401	28.1627	30.5104	23.9871	25.2748	30.0229	35.3664	25.2973	29.1667	26.3314	29.1255
FBgn0003462	Sod1	468.992	299.132	471.15	404.367	452.879	296.459	677.162	433.282	541.631	290.11	387.631	511.53	497.239	446.572	583.348	582.166	539.007	477.402	414.785	417.513	578.819	361.245	454.621	546.694	591.065
FBgn0003463	sog	104.569	90.3721	76.7578	113.863	114.403	99.2496	82.3254	121.826	98.0601	105.144	82.949	113.452	114.101	121.447	88.2207	115.911	113.407	107.601	104.771	126.217	109.032	97.8092	89.2439	100.695	122.8
FBgn0003464	sol	220.24	298.855	239.396	186.673	191.291	336.842	295.767	221.95	226.856	289.946	234.12	153.655	124.798	237.155	236.39	166.568	169.269	220.077	228.355	167.95	194.122	219.816	309.54	156.044	180.316
FBgn0003475	spir	208.368	265.374	197.841	215.177	222.764	243.56	175.302	205.9	182.912	281.081	228.569	200.111	170.417	198.267	161.372	176.112	196.304	178.782	197.274	209.267	207.515	225.342	260.836	187.16	213.587
FBgn0003479	spn-A	7.65227	9.40336	14.1861	6.31279	7.7733	13.9329	16.8837	11.3252	17.2458	5.45829	6.01013	6.28274	6.63163	4.75267	7.27786	6.40195	6.12414	6.87436	4.58248	5.48772	6.39047	2.11929	3.09104	4.38343	4.72306
FBgn0003480	spn-B	2.98455	2.60742	2.19717	1.85898	2.36579	3.41368	2.74418	2.82522	2.62913	3.07798	3.34916	2.50706	2.2462	4.3342	4.0588	3.99388	3.14483	2.73024	4.44016	3.76483	3.15147	2.60217	3.24955	1.97563	2.36153
FBgn0003482	spn-D	0.0819238	0.0277385	0.0477646	0.0387288	0	0.0758596	0	0.121777	0.0938973	0.164159	0.229394	0.060411	0.347626	0.029891	0	0.0881002	0.0275862	0.243772	0.170776	0	0	0.0268265	0.0792574	0.0926077	0
FBgn0003483	spn-E	1.87511	2.08039	1.67176	1.78152	2.1968	2.22521	0.976743	2.2894	2.19094	3.11902	2.06455	2.59767	1.3905	1.55433	1.30628	1.5858	2.09655	2.04768	2.04931	1.85051	1.13803	2.19977	1.74366	1.48172	1.36444
FBgn0003486	spo	0.00436852	0	0	0	0.0422462	0	0	0	0.0625982	0	0	0	0	0	0	0	0	0	0	0	0	0	0	0	0
FBgn0003495	spz	26.713	22.2463	26.4616	26.9165	22.306	30.9254	21.3023	26.9127	31.2052	25.8961	23.7194	26.2184	29.8958	19.9074	22.3468	25.8427	25.3517	25.1085	31.3373	29.4805	30.114	21.9709	27.1853	30.4679	37.9944
FBgn0003499	sr	25.3597	24.715	23.9301	25.561	26.0236	31.0771	25.5348	30.907	19.8749	20.684	23.857	30.2659	21.5528	30.3095	20.9938	31.7748	30.9241	24.0359	30.5688	25.0457	17.1142	19.9052	19.4577	26.0228	28.4958
FBgn0003502	Btk	29.0972	39.0836	28.3722	41.1299	35.4023	32.9736	29.8139	26.3038	20.8139	27.5787	23.9947	20.1773	19.1194	29.0242	20.434	34.4472	29.5448	29.0576	29.9142	33.692	24.6427	30.2871	28.9686	34.3266	29.2305
FBgn0003507	srp	20.1054	8.2106	9.69622	42.2531	31.2199	5.00673	0.372092	11.7149	12.1754	7.30507	16.4246	26.7923	18.3439	10.6711	19.5942	47.3685	42.2345	13.1637	21.2331	26.8962	34.491	4.48002	6.618	39.6052	26.659
FBgn0003512	Sry-delta	26.238	27.1283	32.9576	20.7586	19.6445	35.6793	46.7906	20.2637	30.2975	28.4405	28.5825	16.8245	17.6487	28.9644	33.1702	22.0838	20.8552	20.8668	26.271	17.9627	26.7875	23.6073	38.4002	21.1145	24.6124
FBgn0003513	ss	7.14235	9.12597	6.73481	5.26711	4.01339	10.8226	13.2558	5.94271	6.04073	12.8044	9.26753	7.76281	8.55694	7.05428	8.86406	4.66931	5.32414	10.5309	6.57486	4.05198	6.43424	4.50684	6.10282	3.45735	4.25075
FBgn0003514	sqh	114.615	109.65	104.509	119.943	109.629	104.838	100.511	121.071	148.702	102.107	94.9234	104.813	96.2121	98.1921	123.117	113.062	119.614	101.019	110.691	122.772	139.146	111.169	130.26	123.847	140.957
FBgn0003515	st	10.512	9.68074	7.97669	21.4557	18.8418	5.03202	7.53487	11.5688	12.8326	9.27498	9.40517	11.4781	7.30014	4.48366	2.84583	6.57815	5.62759	5.89927	5.60713	14.1341	14.4004	13.145	14.4645	16.9781	15.7435
FBgn0003517	sta	1276.53	866.967	1183.18	1597.45	1863.61	1062.87	1771.25	752.021	1232.78	1028.7	1226.25	1023.94	1113.69	982.339	2055.43	1278.01	1309.3	1286.58	1468.36	1026.17	1527.37	705.589	1194.69	1498.92	1581.33
FBgn0003520	stau	292.921	328.008	278.611	313.548	307.637	414.244	327.534	366.256	305.292	360.616	258.894	232.552	218.897	323.57	332.402	288.058	323.807	299.985	257.899	273.046	231.414	271.645	291.073	192.624	232.479
FBgn0003525	stg	1.02682	1.69205	0.764234	1.85898	1.18289	0.505731	0.232558	0.779372	0.970272	0.451437	0.871699	0.815548	0.641771	1.16575	1.16632	1.38024	0.937931	1.80391	1.1385	1.24431	0.612785	1.09988	0.752946	0.895208	1.67931
FBgn0003527	stil	0.0166568	0	0	0.116186	0	0	0	0	0.0312991	0	0	0	0	0.0896731	0	0	0	0.0487543	0.11385	0	0	0	0	0	0
FBgn0003545	sub	0.049277	0.110954	0.0477646	0.348559	0	0.0252865	0	0.0243554	0	0	0.137637	0.060411	0.0267404	0	0	0	0	0.0975086	0.0569252	0.127621	0	0	0.118886	0	0
FBgn0003557	Su(dx)	91.7876	106.682	85.2121	97.7127	95.6031	99.3255	77.9534	93.622	77.0271	109.289	83.6831	71.6172	54.5505	95.8606	75.7644	97.292	94.1793	95.9973	97.2851	110.743	100.759	96.1192	115.24	88.6255	82.7585
FBgn0003559	su(f)	49.2555	59.6378	56.1234	40.4328	39.4157	68.7541	67.9534	43.2551	50.2351	61.0261	52.7607	41.1097	42.8115	50.7251	54.9571	37.1783	40.3862	54.4586	51.4034	45.816	37.161	51.6141	58.8486	37.4444	38.6241
FBgn0003567	su(Hw)	26.0774	33.6468	25.1242	25.6772	24.7985	37.2218	24.093	21.725	22.9422	29.7538	24.1782	20.6303	20.0553	28.1574	25.8924	23.464	22.4	31.7391	29.0318	26.1305	24.6427	24.7608	31.3067	21.6702	26.8165
FBgn0003575	su(sable)	56.5009	79.1657	57.1743	61.8111	57.2858	78.54	46.465	57.089	55.9002	65.2122	50.6962	47.0904	45.1111	69.5863	53.091	54.6809	53.0759	59.1877	57.836	48.847	55.0631	53.0896	63.3267	44.4517	42.2451
FBgn0003598	Su(var)3-7	35.1387	41.9129	33.9129	33.3842	28.5162	50.042	38.7441	32.1978	30.7983	41.4091	29.6378	24.7685	20.6436	40.7714	34.8497	29.8366	31.6414	30.3739	40.7584	27.8533	29.7638	48.69	59.7601	30.684	32.3792
FBgn0003607	Su(var)205	100.387	113.423	145.873	75.2887	77.902	131.439	142.93	85.5848	130.517	121.847	96.575	75.3325	89.0189	102.227	139.399	73.5343	75.1173	109.697	115.786	63.4597	74.1908	97.5678	110.049	73.3761	89.1609
FBgn0003612	Su(var)2-10	74.235	104.408	78.6206	63.1666	65.0591	107.645	81.1161	77.2552	65.6342	98.126	78.2694	56.3634	55.4864	87.4014	76.5108	60.0843	66.4828	78.592	82.6838	59.9182	58.9149	78.7893	98.4377	50.5638	52.1111
FBgn0003638	su(w[a])	480.522	783.253	585.929	273.077	300.751	792.48	636.325	435.888	452.836	789.605	564.081	351.713	459.133	617.878	543.46	288.411	331.448	600.604	610.352	287.786	280.524	408.299	569.702	202.224	366.772
FBgn0003651	svp	34.072	38.3901	30.6171	55.4209	47.4002	29.3577	18.9302	29.3482	22.6919	31.7648	32.207	34.6759	26.9009	34.016	29.8112	42.0532	41.0759	33.738	36.7452	33.022	35.1038	23.3927	26.8683	46.1495	38.0469
FBgn0003654	sw	42.9831	55.1442	44.7077	35.6305	32.5718	55.2258	34.0465	40.6004	37.1207	59.877	46.2	33.6489	31.9014	47.2278	43.014	39.9388	42.2897	40.076	43.2062	43.8379	40.6189	48.2608	59.2449	36.7961	40.4084
FBgn0003655	swa	0.904729	0.055477	0.0955293	0.426016	0.126739	0.682736	0.651162	0.0487107	0.34429	0.492477	0.0917577	0.302055	0.187183	0.119564	0.886406	0.469868	0.193104	2.04768	5.69252	2.58433	5.69015	0.134132	0.277401	0.0617384	0.0524784
FBgn0003656	sws	174.373	231.256	162.734	170.755	161	220.903	126.139	166.688	151.362	219.029	183.057	149.306	145.735	207.235	170.05	173.646	176.552	192.092	202.141	190.858	179.283	155.003	181.46	135.855	132.823
FBgn0003660	Syb	57.5692	44.0765	57.7952	62.0435	53.1034	42.6584	39.9999	47.7365	58.9988	47.3188	53.2195	65.3647	66.343	46.63	73.525	74.0923	70.9242	60.5529	54.8189	68.054	68.238	38.3887	44.186	72.8514	70.7409
FBgn0003676	CCT1	48.4156	51.5936	57.8907	50.4636	62.9891	60.5612	72.8371	39.7723	46.667	50.643	49.5951	33.226	34.2545	45.3746	66.0139	37.7656	34.4552	56.1162	53.6235	32.7668	37.555	40.9103	61.5038	41.7352	43.6621
FBgn0003683	term	0.0745576	0.138693	0.0477646	0	0.0844924	0.202292	0	0.194843	0	0.287278	0.0458789	0.181233	0	0.119564	0	0	0	0	0	0	0	0.214612	0.158515	0.0617384	0.0524784
FBgn0003687	Tbp	13.624	15.1452	13.7084	10.0307	8.82945	21.8223	23.3488	12.5187	14.5854	14.2818	15.14	9.48452	9.62656	14.2281	16.0486	10.8657	11.3103	15.2113	16.3375	11.0392	13.7439	12.528	15.1382	9.72381	12.28
FBgn0003701	thr	0.892549	0.832156	1.52847	0.735846	0.253477	0.202292	0	0.219198	0.281692	1.55951	1.00934	0.906165	0.58829	1.31521	1.95942	0.792902	0.937931	1.41388	0.88234	1.14859	0.744096	1.20719	1.34738	0.4013	1.15453
FBgn0003710	tipE	51.5728	73.3961	53.5441	50.2312	46.682	64.3542	49.8604	59.5489	39.5621	63.037	56.6145	47.4528	45.8064	59.0647	41.3345	42.6992	44.4138	47.4867	49.0695	52.1971	38.1678	66.5296	69.588	34.9131	42.1927
FBgn0003714	tko	28.9444	16.9482	36.5399	20.2164	19.6022	21.9234	61.4883	23.0645	39.343	20.8072	33.721	31.5647	42.2766	25.0487	39.515	20.9972	26.3448	34.2743	26.4417	28.0129	27.0063	22.1318	23.9754	24.1397	29.283
FBgn0003716	tkv	47.4259	51.0666	45.663	60.4943	54.4976	54.4672	38.2325	48.1506	41.3148	50.4378	43.2638	40.1129	29.2006	52.8772	41.1479	52.9776	53.3242	46.0728	46.8779	55.9938	48.1912	47.5633	48.1489	47.6312	40.5134
FBgn0003719	tld	5.94472	5.71413	4.68093	3.79542	5.36526	7.45953	3.11627	7.0387	7.82478	9.35706	8.57935	7.79302	7.19318	3.49725	4.66529	3.34781	3.91724	5.55799	4.04169	3.82864	3.37032	4.96289	6.34059	11.3599	9.86595
FBgn0003720	tll	0.00559514	0.0277385	0	0	0	0	0	0	0	0	0	0	0	0	0	0	0	0	0	0.0319053	0.0437704	0	0	0.0308692	0
FBgn0003721	Tm1	463.922	439.434	437.237	436.008	402.986	444.461	537.999	364.235	401.912	439.659	443.19	520.501	558.849	344.823	341.593	316.045	361.931	512.164	344.653	795.623	899.787	390.083	455.572	434.608	510.773
FBgn0003731	Egfr	49.3974	32.0657	24.8854	94.0334	96.2368	15.7029	16.4651	34.2924	30.5479	38.1259	41.7039	55.3667	46.6086	35.7497	39.8883	88.247	81.6	33.2504	48.5287	62.8216	74.0157	24.9754	32.2578	83.2234	54.9449
FBgn0003733	tor	1.87209	0.110954	0	0.348559	0	0.0758596	0	0	0.0312991	21.9563	21.3337	0.120822	0.160443	0.029891	0	0.0881002	0.0275862	0.0487543	0.370014	0	0	0	0.0396287	0.0308692	0.157435
FBgn0003741	tra	26.4874	31.511	32.8143	15.9563	16.3915	46.1226	44.9767	20.0688	28.7639	35.0069	29.3625	22.5333	26.8207	25.0487	38.8619	14.8889	17.7655	32.6166	30.455	16.6865	17.6832	24.9754	31.2274	14.6938	20.4666
FBgn0003742	tra2	23.8723	28.4042	22.6882	17.7378	14.8707	36.008	25.8604	22.066	26.2287	27.1683	24.224	19.3617	19.9751	25.0487	29.7179	18.8534	19.4759	27.3024	29.2595	19.3027	23.1545	26.7996	28.176	19.2624	21.9885
FBgn0003744	trc	81.6246	112.646	88.1257	80.0911	77.0993	93.459	56.279	79.0332	72.0505	93.4065	82.7196	67.5999	60.9415	90.6296	74.4581	81.1697	80.4966	77.3731	78.8698	90.643	77.2109	98.3994	99.7851	74.2405	72.2628
FBgn0003747	Gr5a	0.283587	0.471555	0.143294	0.348559	0.0844924	0.404584	0	0.340975	0.0312991	0.246238	0.596425	0.271849	0.0802213	0.597821	0.886406	0.264301	0.275862	0.0975086	0.199238	0.414769	0.175081	0.348744	0.0792574	0.185215	0.262392
FBgn0003748	Treh	387.62	415.19	380.589	452.701	452.414	485.046	490.278	476.708	477.061	342.313	266.419	273.934	221.117	316.785	338.467	446.551	430.124	451.806	410.772	361.423	438.491	296.298	312.195	394.169	372.02
FBgn0003751	trk	0.90892	0.887633	2.10164	1.23932	0.802677	0.682736	0	0.608884	2.66042	0.820795	1.7434	0.453082	1.20332	1.13586	1.49289	0.616701	0.744828	1.12135	0.540789	0.733822	0.218852	0.536529	0.554802	0.493908	0.419827
FBgn0003861	trp	3565.88	2200	2113.82	2900.05	2858.42	2782.83	2629.95	4070.49	4934.15	3498.68	2911.52	3087.03	2504.8	3051.76	3248.68	4766.4	4800.8	3467.55	2605.89	4642.42	5798.78	3398	4012.41	4330.06	4966.56
FBgn0003862	trx	89.0021	126.737	61.7597	122.693	111.445	114.295	74.1394	92.5261	51.7687	108.222	83.4078	72.8254	55.8073	104.529	65.1741	83.8714	86.869	103.164	103.405	90.1963	77.8675	103.818	109.494	61.9237	70.1112
FBgn0003863	alphaTry	0.883535	0.055477	0.0477646	0.0774575	4.35136	0.126433	0	0.121777	0	4.51437	11.2403	0.0906165	0.0267404	0	0	0.0881002	0.0551724	0	0	0.159527	0.218852	0	0	0.0308692	0
FBgn0003865	tsg	0.011358	0	0	0	0	0	0	0	0	0	0	0.0302055	0.213924	0	0	0	0	0	0.0284626	0	0	0	0	0	0
FBgn0003866	tsh	10.0544	12.1495	11.368	9.52728	8.95619	13.3513	16.1395	7.96421	7.63698	10.9576	9.90984	7.30973	6.84555	7.71189	8.91071	7.87029	7.91724	10.0434	9.19342	9.85874	7.74735	12.3938	14.4249	11.2055	11.9126
FBgn0003867	tsl	35.8588	18.0855	23.0703	45.0416	48.3719	7.28252	8.97673	26.7178	36.5887	15.4309	30.0965	49.2047	37.6773	22.7172	26.9187	75.0026	72.1655	22.3782	26.9541	49.198	61.9351	16.8738	15.693	72.1722	52.0586
FBgn0003870	ttk	64.8448	46.5175	44.9465	88.534	78.2822	49.9915	37.3023	74.4544	52.0191	53.1465	54.0453	62.4347	58.0802	67.5836	48.3324	73.9748	79.9449	71.3763	78.3575	89.1754	74.8473	70.795	63.6437	70.3201	68.1695
FBgn0003882	tub	36.8243	38.1127	37.0654	43.1438	34.4306	44.7319	26	33.6835	44.476	40.26	36.4737	30.6284	33.6127	32.8502	38.3021	38.7641	40.5793	26.7661	38.3676	34.0111	41.0566	34.8207	41.2535	39.3891	35.0031
FBgn0003884	alphaTub84B	1318.03	1191.18	1365.07	1157.49	1269.54	1268.22	1752.79	1326.98	1846.33	1203.29	1233.64	1161.94	1220.03	1134.93	1467.51	1130.15	1188	1213.3	1124.16	1370.33	1622.83	1188.52	1694.13	1136.14	1366.28
FBgn0003885	alphaTub84D	181.207	188.677	200.373	131.213	140.342	193.164	271.907	190.459	289.485	157.511	158.374	154.682	161.699	152.564	191.324	167.567	180.221	128.468	150.254	179.627	213.906	171.099	227.39	158.328	190.339
FBgn0003886	alphaTub85E	1.27591	0.305124	0.191059	0.580931	0.633693	0.151719	0	0.31662	0.500786	0.492477	0.82582	4.68185	5.50853	0.478257	0.373223	0.234934	0.22069	0.877578	1.11004	0.989065	1.6195	1.66324	1.38701	3.85865	3.62101
FBgn0003889	betaTub85D	2.43338	3.80018	3.67788	1.16186	1.0984	3.48954	0.0930231	1.8023	1.43976	4.35021	3.21152	3.23199	4.25173	2.51085	3.12575	1.61517	1.26897	2.29145	1.90699	1.8186	1.96967	2.3339	2.97215	1.88302	3.09623
FBgn0003890	betaTub97EF	115.508	97.1126	110.145	139.501	148.2	58.513	84.2789	120.632	170.518	81.3408	100.154	126.712	109.957	78.464	103.803	144.572	136.221	85.9539	71.7257	139.937	185.893	78.7088	106.76	141.381	151.715
FBgn0003891	tud	283.599	299.271	244.794	385.622	355.037	358.942	259.907	288.514	229.109	259.658	248.618	207.542	236.198	313.706	285.143	282.244	294.4	332.407	336.143	254.253	225.855	300.885	319.328	233.587	255.203
FBgn0003892	ptc	3.49685	4.27173	3.24799	5.30584	4.9428	2.78152	1.44186	2.38683	1.56496	4.10397	2.70685	3.65486	2.6473	4.36409	3.45232	4.63994	4.68966	2.73024	3.35859	5.20057	3.28278	3.16552	3.32881	4.13648	2.51896
FBgn0003896	tup	28.1321	36.3652	30.4261	21.843	22.9819	40.0286	35.1627	29.2021	26.7607	35.5815	25.9216	22.926	27.3287	32.4916	25.3792	23.5228	24	29.7401	31.195	26.4495	21.4912	31.7089	32.4163	20.3119	21.936
FBgn0003900	twi	0.564085	0.360601	0.477646	0.30983	0.211231	1.16318	1.58139	0.487107	0.532085	1.02599	0.321152	0.483288	1.04288	0.508148	0.886406	0.411134	0.275862	0.780069	0.597714	0.510485	0.218852	0.295091	0.31703	0.216085	0.524784
FBgn0003920	snRNA:U2:14B	0.0401655	0	0.0955293	0	0	0	0	0.0487107	0.156496	0	0	0	0.294145	0	0.233265	0	0	0	0	0	0	0	0	0.0308692	0.104957
FBgn0003922	snRNA:U2:38ABa	0.0591874	0.110954	0.191059	0.30983	0.0844924	0	0	0	0	0	0	0.151027	0.187183	0	0.139959	0	0	0	0.0284626	0	0.0437704	0.134132	0.0396287	0	0
FBgn0003923	snRNA:U2:38ABb	0.0153937	0.138693	0	0	0.0844924	0	0	0	0	0	0	0	0	0	0	0	0	0.146263	0	0	0	0	0	0	0
FBgn0003930	snRNA:U4:39B	0.762601	0.527032	0.573176	0.503474	0.5492	0.783882	0.930231	0.170488	0.438188	2.91382	0.871699	1.48007	1.68465	0.717385	0.279918	0.381768	0.634483	0.0487543	0.569252	0.829538	0.393933	0.670661	0.356658	0.524777	1.4694
FBgn0003931	snRNA:U4:38AB	0.0223708	0.166431	0	0.0387288	0.0422462	0	0	0.0487107	0	0	0	0	0	0	0	0	0	0	0	0	0	0	0	0.0308692	0.209914
FBgn0003935	snRNA:U5:34A	0.0178463	0	0	0.0387288	0	0	0	0	0	0	0.0458789	0.151027	0	0.029891	0	0.0293667	0	0	0.0284626	0	0	0	0	0	0.104957
FBgn0003936	snRNA:U5:35D	0	0	0	0	0	0	0	0	0	0	0	0	0	0	0	0	0	0	0	0	0	0	0	0	0
FBgn0003938	snRNA:U5:63BC	0.02287	0	0.0477646	0	0.0844924	0	0	0	0	0	0	0	0	0.0896731	0.0466529	0	0	0.0487543	0	0.095716	0	0	0	0.0308692	0.104957
FBgn0003941	RpL40	695.595	560.29	626.576	940.373	1039.55	516.477	793.627	541.128	712.524	658.606	567.797	747.254	795.395	486.716	845.818	731.379	715.476	663.4	656.262	631.151	838.115	392.954	492.902	850.046	890.454
FBgn0003942	RpS27A	658.687	401.071	581.2	846.882	916.362	494.554	876.696	447.359	801.946	481.027	532.47	645.038	845.292	394.502	834.481	670.501	685.104	641.119	650.484	565.33	819.075	367.737	503.205	815.688	991.37
FBgn0003943	Ubi-p63E	344.368	213.281	189.387	91.4773	76.8036	353.05	313.813	336.275	393.117	223.256	422.269	201.199	199.27	456.048	538.235	460.236	453.6	373.799	466.445	463.808	492.592	358.509	472.057	337.617	378.684
FBgn0003944	Ubx	0.683686	2.38551	1.05082	0.968219	1.22514	1.06203	0	0.68195	0.0938973	1.43639	0.688183	0.513493	0.61503	0.508148	0.233265	0.499235	0.524138	0.487543	0.88234	0.255243	0.393933	0.83162	0.396287	0.308692	0.367349
FBgn0003950	unc	0.23323	0.110954	0	0.116186	0.0422462	0.303438	0	0.146132	0.0938973	0.164159	0.0917577	0.151027	0.294145	0.29891	0.233265	0.0293667	0.0275862	0.438789	0.569252	0.159527	0.393933	0.670661	0.752946	0.246954	0.262392
FBgn0003961	Uro	0.0171786	0.055477	0	0	0	0.0758596	0	0.0243554	0	0	0	0	0.0267404	0	0	0	0	0	0.142313	0	0.0875407	0	0	0	0
FBgn0003963	ush	14.9103	18.1133	13.3741	12.7418	13.4343	22.7073	16.9302	14.8081	12.4883	21.2586	17.2505	13.8643	15.349	13.8993	13.4827	10.0434	11.669	12.7736	16.3375	11.2307	11.818	14.3253	24.4905	12.286	13.1721
FBgn0003964	usp	69.4806	83.7426	79.6714	60.8042	60.9612	94.9762	85.1626	66.7581	74.2415	88.8921	66.7079	59.8673	50.1918	70.1842	76.3708	60.3486	56.9931	67.1347	68.0256	63.3321	67.1437	69.2659	74.8586	56.9846	64.9158
FBgn0003965	v	26.4592	11.0677	14.3772	37.9929	35.1488	7.33309	7.02324	10.0831	18.8421	14.405	38.4006	25.0706	14.3596	15.1548	35.8294	68.0721	58.7311	20.1355	28.918	25.8114	44.7333	4.34589	6.73688	58.1267	34.3209
FBgn0003969	vap	68.7538	89.6232	75.3248	60.6105	59.4404	111.463	82.9766	69.1449	60.8455	73.9536	66.9373	51.4399	56.4491	79.1515	72.0321	56.7953	58.8414	70.1087	77.6459	61.322	54.8443	79.6746	86.8265	45.0999	49.5396
FBgn0003975	vg	9.78053	17.1424	11.2247	4.53127	4.52034	18.8132	10.8837	10.3023	8.23167	13.7894	11.378	8.54815	6.89903	12.0461	11.43	5.87335	6.15173	12.6274	14.459	6.5725	6.04031	9.17465	10.9772	4.35256	8.7639
FBgn0003977	vir	33.1411	40.5537	32.671	30.7119	30.544	43.2147	31.9534	30.0058	26.5103	41.0397	36.4737	25.3122	23.8792	36.4372	37.0891	29.0437	30.869	36.8583	40.6161	30.7886	37.73	29.5091	44.5823	22.0715	26.9214
FBgn0003978	vls	8.7903	10.0968	9.64846	5.96423	6.29468	10.9238	6.55813	7.84243	11.4868	11.0397	15.2777	8.2763	8.02213	10.2227	12.5963	7.42978	7.53104	8.28823	8.73801	7.37013	8.05375	7.13584	9.03535	7.09992	6.03502
FBgn0003979	Vm26Aa	0.00953017	0	0.143294	0	0	0	0	0.0243554	0	0	0	0.0302055	0	0	0	0	0	0	0	0	0	0	0	0.0308692	0
FBgn0003980	Vm26Ab	0.198213	0.332862	0.0955293	0	0.0422462	0.151719	0.837208	0.0730661	0.0312991	0.287278	0.688183	0.060411	0.695252	0.179346	0.0933059	0.0293667	0	0.34128	0.170776	0	0	0.0804794	0.0396287	0.370431	0.157435
FBgn0003983	Vm34Ca	0.00923319	0	0	0	0	0	0	0.0974215	0	0	0	0	0	0	0.0933059	0	0	0	0	0	0	0	0	0.0308692	0
FBgn0003984	vn	12.426	12.5101	10.3172	17.273	16.8562	11.4548	6.8372	14.5402	10.36	11.8194	10.9651	15.6464	13.4237	13.4809	10.217	17.855	15.6138	10.7259	8.73801	14.0383	9.10423	11.6695	9.86755	11.2673	13.6444
FBgn0003996	w	16.2811	18.1965	16.9087	20.5262	18.6728	5.48718	5.25581	6.79515	8.95155	13.1327	18.3974	27.3964	19.7879	6.24723	6.25149	11.4824	13.9586	16.674	11.3281	42.785	38.2991	11.2939	13.3152	18.2437	21.3587
FBgn0003997	hid	11.6182	18.3074	12.2755	12.7418	11.4487	11.7582	9.58138	10.4972	7.60568	13.9946	15.0024	13.0488	9.46612	10.6412	9.23728	8.07585	8.85518	16.3327	13.1213	19.207	7.9662	11.4281	8.32203	9.84728	10.0759
FBgn0004003	wbl	4.67043	2.52421	1.91059	3.48559	3.33745	3.46425	3.48837	2.36247	2.66042	8.49523	6.69832	8.66897	10.4555	3.46736	3.49897	2.99541	2.73104	3.85159	3.58629	5.00914	3.80802	4.02397	5.46876	7.43948	8.65894
FBgn0004034	y	0.193875	0.305124	0.429882	0.271101	0.380216	0.0758596	0	0.121777	0	0.328318	0.0917577	0.33226	0.240664	0.179346	0	0.0587335	0.22069	0	0.426939	0.095716	0.0875407	0.241438	0.237772	0.370431	0.157435
FBgn0004045	Yp1	3712.85	1.96943	3.15247	11895.7	22056.4	1.77006	2.88372	7.50145	8.66985	3.2011	4.08322	6658.86	7599.39	4.30431	4.19876	4895.67	23.531	21.5007	7.37181	5557.56	11175.4	5.76769	8.20314	10785	8376.19
FBgn0004047	Yp3	3322.53	48.9307	47.0004	11060.5	20676.5	27.9922	53.9999	69.1936	83.4747	89.795	61.6612	6765.24	7432.91	68.4206	90.6933	3465.36	89.6552	62.113	53.595	3771.97	7801.5	39.9178	55.9558	9838.36	7985.91
FBgn0004049	yrt	44.3351	51.3717	36.8743	42.8727	42.6686	48.8536	41.7209	46.3239	38.6857	55.6499	42.3921	36.8507	34.1208	49.8881	41.801	44.4319	45.5724	47.633	51.005	50.7933	49.5043	46.0074	47.0789	34.4192	37.5221
FBgn0004050	z	56.0794	70.1507	64.9599	39.0773	42.5419	77.3009	64.558	48.9786	61.6592	67.3873	58.2203	43.6167	45.0844	67.1951	74.6447	40.9372	43.3379	65.1845	72.295	45.497	46.9218	49.4412	72.4809	38.9878	45.4463
FBgn0004052	Z600	0.00682839	0	0	0	0	0	0	0	0	0	0	0	0	0	0	0	0.0275862	0.0487543	0	0	0.0875407	0	0	0	0
FBgn0004053	zen	0.00951039	0.0277385	0	0	0.0422462	0	0	0	0	0	0	0.0302055	0	0	0	0	0	0.0487543	0	0	0	0.0268265	0	0	0.0524784
FBgn0004054	zen2	0.00330239	0	0	0	0	0	0	0	0	0	0	0	0	0	0	0	0	0	0	0	0	0	0.0792574	0	0
FBgn0004055	uzip	128.855	149.455	139.234	131.174	114.994	137.407	93.5347	124.285	118.968	165.349	141.307	121.668	113.112	134.39	95.2653	134.441	124.414	115.889	117.01	155.411	117.348	163.185	135.57	137.738	111.359
FBgn0004057	Zw	32.6518	18.779	17.1953	41.1299	47.4847	10.9491	5.53487	15.3195	19.5306	24.0903	26.0592	35.1592	25.5906	24.0025	27.6185	68.1896	57.4621	27.6437	30.5119	53.1543	73.9719	17.3835	24.4509	49.4525	42.9798
FBgn0004066	Prosalpha4	48.1567	67.044	61.8074	45.119	42.2462	42.4055	35.2558	42.9385	49.9534	41.9837	86.8028	39.9317	40.2711	39.2469	57.3831	45.5772	42.9242	40.6123	38.2537	55.8343	44.7771	37.0205	56.5898	52.6629	49.1198
FBgn0004087	Dhfr	4.51828	2.94028	6.01834	5.42203	5.5765	3.74241	9.76743	2.947	4.63227	2.17511	4.45025	5.28596	4.67958	2.83965	6.3448	5.05108	4.55173	4.53415	3.18781	3.89245	4.98982	2.25342	3.1703	5.52559	4.46067
FBgn0004101	bs	14.4342	17.614	15.1414	11.2701	12.1247	16.5121	13.1163	12.8596	13.8655	19.1245	18.8562	12.1124	13.4772	14.9455	14.8823	12.6277	13.6276	15.7476	16.1952	13.9745	14.2691	12.3133	17.4763	11.4834	12.8047
FBgn0004102	oc	63.0638	71.5376	57.5564	54.0654	46.1328	70.2713	36.5116	72.7251	53.6467	61.5596	55.1464	62.2837	58.8557	95.9801	69.6528	64.6362	70.3173	91.7069	83.9931	70.3831	46.7467	78.8966	52.4288	42.1056	46.3909
FBgn0004103	Pp1-87B	246.75	277.968	231.993	272.108	256.392	256.861	190.697	260.286	259.689	279.85	208.887	210.925	204.538	257.631	217.823	274.197	268.331	233.046	226.989	271.131	235.878	281.517	261.272	252.356	231.64
FBgn0004106	Cdk1	0.293842	0.110954	0.143294	0.271101	0.168985	0.177006	0.976743	0.414041	0.281692	0.410397	0.0917577	0.543699	0	0.418475	0	0.352401	0.248276	0.390035	0.170776	0.191432	0.262622	0.268265	0.277401	0.463038	0.419827
FBgn0004107	Cdk2	8.4383	10.0691	9.64846	5.18965	5.0273	10.6709	12.7907	5.79658	6.51021	10.0547	9.03814	5.95048	5.18765	11.5678	11.5699	6.25512	7.58621	11.1647	12.6089	8.61444	7.26588	8.12842	11.532	4.93908	5.3528
FBgn0004108	Nrt	43.918	48.9307	44.8988	53.3295	50.104	45.5663	41.2092	50.8297	35.7749	43.7484	34.7303	31.2627	23.8525	52.6381	36.9025	45.401	43.8345	38.4184	43.2631	55.1962	46.6592	51.1044	51.7155	40.1609	44.5017
FBgn0004110	tin	0.313351	0.138693	0.286588	0.0387288	0.168985	0.556304	0.744185	0.292264	0.0938973	0.0410397	0.504668	0.0906165	0.187183	0.657603	0.373223	0.0587335	0.275862	0.195017	0.626177	0.319053	0.350163	0.348744	0.515173	0.185215	0.472306
FBgn0004117	Tm2	365.311	347.231	347.01	375.127	335.223	303.919	294.139	225.604	271.05	323.311	402.174	418.225	529.14	228.457	260.603	223.716	245.352	362.196	256.704	696.015	755.739	335.062	389.907	387.471	454.096
FBgn0004118	nAChRbeta2	85.9419	126.183	104.605	74.6691	78.1132	130.858	144.325	100.32	95.5562	96.6896	81.1139	67.7207	66.6372	75.4749	68.7664	62.1694	66.5655	79.5183	73.8319	70.2236	61.2785	92.7659	112.585	59.6393	72.9975
FBgn0004132	boca	36.3023	34.1184	51.9202	28.6206	30.6707	38.0815	59.5348	29.7866	46.5731	37.5103	37.3454	33.3771	46.769	28.9345	56.9166	25.6959	27.3655	40.1736	33.5859	23.2909	28.582	27.0679	34.0411	28.5232	42.7699
FBgn0004133	blow	29.0902	27.8495	28.0378	26.2581	25.9392	31.0519	34.6511	32.3196	33.7404	34.2682	38.4465	25.6445	27.0346	22.4781	25.8924	25.6078	27.1724	31.4465	25.844	34.4258	38.9994	20.7637	28.8893	22.7506	28.6532
FBgn0004143	nullo	0.0248795	0.249647	0.0955293	0.0387288	0.0422462	0.0505731	0	0	0	0	0	0	0.0267404	0	0	0	0	0	0	0.0319053	0	0	0	0.0617384	0
FBgn0004167	kst	235.882	238.634	184.228	310.953	281.655	213.09	163.069	262.6	236.496	287.689	233.156	198.964	162.582	246.452	202.52	281.803	276.662	249.037	240.196	269.281	312.827	182.876	216.333	201.576	208.497
FBgn0004168	5-HT1A	81.4714	149.871	83.9702	61.6562	59.9473	137.281	72.5115	85.1464	67.6061	117.292	84.6924	69.231	61.1019	104.14	78.0503	57.6469	65.738	90.1467	87.5224	66.2354	53.0059	100.009	101.291	49.2673	51.9536
FBgn0004169	up	553.215	452.582	437.858	575.819	486.296	385.797	383.209	360.143	370.394	524.898	513.522	724.841	910.111	366.793	368.232	370.08	409.683	600.409	383.22	1011.78	1332.68	443.817	506.098	646.618	712.29
FBgn0004170	sc	0.0130396	0	0.191059	0	0	0	0	0	0	0	0	0	0	0	0	0.0293667	0	0.0487543	0	0	0.0437704	0	0	0	0
FBgn0004171	Mst98Cb	0.0173554	0	0.0955293	0	0	0.0252865	0	0.121777	0	0	0	0	0	0	0	0	0	0	0	0.0638106	0	0	0.0792574	0.0308692	0
FBgn0004172	Mst84Da	0.0193394	0.0277385	0	0	0	0	0	0.0243554	0.219094	0	0	0.0302055	0	0	0	0	0.0551724	0	0	0.0638106	0.0437704	0	0	0	0
FBgn0004173	Mst84Db	0.0150324	0.0277385	0.0477646	0	0	0.0505731	0	0.0243554	0	0	0.0917577	0.0302055	0	0	0	0	0	0.0487543	0	0	0	0	0.0396287	0	0
FBgn0004174	Mst84Dc	0.0126398	0.0277385	0	0	0	0	0	0.0730661	0	0	0	0	0.0802213	0	0.0466529	0	0	0	0	0.0319053	0.0437704	0	0	0	0
FBgn0004175	Mst84Dd	0.0250412	0.0277385	0	0	0	0.0505731	0	0.0243554	0	0	0.0917577	0.0302055	0.213924	0	0	0	0	0	0.0569252	0	0.0437704	0	0	0.0617384	0
FBgn0004177	mts	483.252	585.477	504.681	305.26	306.961	653.556	533.115	438.177	520.442	580.548	510.999	434.717	548.767	512.93	531.61	380.71	378.235	694.603	541.074	446.547	375.725	486.149	471.978	378.765	477.029
FBgn0004179	Csp	247.572	324.624	259.362	282.759	259.603	218.88	181.86	286.979	223.006	241.519	215.264	233.096	221.625	270.693	176.535	251.555	261.104	220.711	220.699	346.173	217.801	344.532	274.429	220.53	188.398
FBgn0004181	Ebp	0.240599	0.277385	0	0	0.0422462	0.328725	0	0.340975	0	2.38031	0.963456	0.483288	0.0267404	0	0	0	0	0	0	0.510485	0.393933	0.0268265	0	0	0
FBgn0004183	snRNA:U1:82Eb	0.0188401	0	0	0.0774575	0	0.278152	0	0	0	0	0	0	0	0	0	0	0	0	0.0569252	0	0	0	0.0396287	0	0
FBgn0004185	snRNA:U1:95Ca	0.00325664	0	0	0	0	0.0505731	0	0	0	0	0	0	0	0	0	0	0.0275862	0	0	0	0	0	0	0	0
FBgn0004186	snRNA:U1:95Cb	0.0349432	0.110954	0	0	0	0	0	0.0974215	0	0.0410397	0.137637	0	0	0	0	0	0.0275862	0	0.142313	0	0.0437704	0.0804794	0	0	0.157435
FBgn0004187	snRNA:U1:95Cc	0.0871014	0.0832156	0	0.0387288	0	0.101146	0	0.121777	0	0.205199	0.0458789	0	0	0.029891	0.0933059	0.0587335	0	0.0975086	0.0284626	0.095716	0	0.0536529	0	0.0926077	0.944612
FBgn0004188	snRNA:U6:96Aa	0.0318154	0	0.0477646	0.0387288	0	0	0	0.0730661	0	0	0	0.151027	0.106962	0	0	0	0	0	0	0	0.306392	0	0.0396287	0	0
FBgn0004189	snRNA:U6:96Ab	0.0107239	0	0	0	0	0	0	0.0243554	0	0	0	0	0.0802213	0	0.0933059	0	0.0275862	0	0	0.0319053	0	0	0	0	0
FBgn0004190	snRNA:U6:96Ac	0.00869805	0	0	0	0.0422462	0	0	0.0243554	0	0	0	0	0	0.0896731	0	0	0	0	0	0	0	0	0	0	0.0524784
FBgn0004191	snRNA:U2:34ABa	0.362009	0.416078	2.96141	2.09135	2.45028	0	0	0.267909	0.0938973	0.164159	0	0.0302055	0.160443	0	0	0	0	0	0	0	0	0	0	0	0.0524784
FBgn0004192	snRNA:U2:34ABb	0.100901	0	0	0	0	0	0.0465116	0.0974215	0.125196	0	0.137637	0.120822	0.0534809	0.029891	0.139959	0	0	0.0487543	0.0284626	0.095716	0.131311	0.160959	0.118886	0.246954	0.839655
FBgn0004197	Ser	1.27548	0.915371	0.573176	2.24627	1.18289	0.429871	1.06977	0.828083	0.500786	0.820795	1.97279	0.60411	0.61503	1.40488	1.72616	1.6739	1.84828	1.36512	1.76468	2.10575	2.66999	0.724314	1.14923	1.26564	1.15453
FBgn0004198	ct	273.496	379.824	259.935	190.003	198.135	373.28	227.162	322.928	201.754	322.819	267.611	335.523	356.905	362.279	227.246	202.777	223.007	346.448	300.906	279.65	185.936	352.07	259.489	164.965	223.243
FBgn0004227	nonA	152.668	194.502	160.537	135.628	132.273	189.775	180.279	165.251	145.51	177.004	155.438	132.632	128.434	170.379	140.705	133.56	137.159	166.837	151.592	150.529	127.985	174.587	175.872	114.124	123.429
FBgn0004228	mex1	0.102971	0.221908	0.191059	0.116186	0.422462	0.0505731	0	0.0974215	0	0.246238	0.0917577	0	0.0534809	0.0597821	0.139959	0.0293667	0.0275862	0.0975086	0.284626	0.0638106	0.131311	0.0536529	0	0.0926077	0
FBgn0004237	Hrb87F	115.578	163.824	118.313	84.9322	90.8293	169.344	108.977	121.144	91.7377	139.535	118.643	83.5484	97.7898	128.203	130.815	105.28	101.793	160.84	143.964	81.1352	88.9414	121.524	148.172	86.8043	87.7964
FBgn0004240	DptA	15.2354	3.52279	45.9496	46.4745	1.85883	2.47808	8.27906	3.94557	0.68858	2.05199	1.69752	168.637	4.06455	5.11137	17.3082	4.02324	4.6069	2.34021	4.72479	8.423	14.2254	13.5742	0.0792574	1.11129	0.472306
FBgn0004242	Syt1	926.644	1424.82	1046.33	1106.91	1016.53	965.996	707.255	947.083	654.59	1167.58	990.8	992.975	1126.79	985.059	634.013	740.923	817.186	930.086	943.421	1066.53	656.862	1196.35	884.672	607.383	629.321
FBgn0004244	Rdl	1521.17	2543.9	1670.42	620.861	608.979	3336.13	1879.02	1710.65	1501.07	2676.57	1851.03	1589.44	2157.85	1505.52	1198.7	637.846	813.876	2052.7	1612.23	979.972	593.088	1793.8	1489.76	571.42	1113.23
FBgn0004359	T48	15.7316	13.8138	13.0875	15.2591	15.6311	16.9673	12.4651	15.149	18.2787	18.0985	15.0941	16.311	16.2314	13.7499	14.4624	20.9679	17.3793	14.48	17.0206	16.6227	17.6395	11.0525	12.7604	16.6694	18.3675
FBgn0004360	Wnt2	5.94886	3.07898	2.86588	1.89771	0.633693	2.65509	0.930231	1.16906	0.625982	20.5199	27.5273	25.8257	28.639	1.91303	4.38537	1.43897	1.21379	3.26654	3.44397	1.34002	2.45114	1.12671	1.98144	1.48172	2.36153
FBgn0004362	HmgD	76.2467	84.9353	93.9053	47.5589	44.781	163.806	143.442	79.8613	102.755	126.936	66.6161	55.5479	54.2564	74.6977	100.071	51.1275	52.3862	86.4902	77.589	39.8817	38.4741	70.8487	77.1175	45.4086	51.4289
FBgn0004363	porin	953.361	911.238	1003.25	857.106	824.138	686.023	875.533	876.623	1161.38	708.88	790.31	862.85	856.951	810.197	925.454	909.958	953.435	896.836	814.855	1248.1	1381.79	1049.96	1179.71	1048.94	1247.15
FBgn0004367	mei-41	6.75864	8.34929	5.73176	7.35846	5.66099	7.71239	7.81394	6.23497	5.60254	8.78251	8.80874	4.34959	4.35869	7.71189	7.88434	7.66472	7.0069	8.77578	9.33573	5.32819	6.74063	6.06278	7.7276	4.47604	2.72888
FBgn0004368	Ptp4E	79.5818	109.012	70.0229	70.0991	71.3538	97.9853	70.279	83.8555	56.2445	111.013	83.4996	65.8782	55.9945	104.23	72.6853	81.5808	80.8828	99.3613	93.3857	80.4014	74.6285	75.3823	86.8662	55.2868	60.0353
FBgn0004369	Ptp99A	208.406	358.298	245.08	170.987	161.592	330.04	233.441	209.87	151.112	278.742	204.436	181.716	190.285	248.664	206.626	148.067	176.359	277.12	251.182	179.276	135.907	202.191	196.519	121.131	143.109
FBgn0004370	Ptp10D	54.6985	66.2118	43.6091	60.1458	55.4692	59.8532	33.5348	52.7537	35.3054	63.6937	53.5865	53.4033	44.4961	64.4451	40.9613	54.0054	50.5931	59.6753	56.0144	76.7642	57.8206	60.4937	63.3663	51.9838	54.5776
FBgn0004372	aly	0.0352333	0.055477	0	0	0	0	0.418604	0	0	0	0.0458789	0	0.0267404	0	0	0	0	0.0975086	0.11385	0	0.0875407	0	0	0	0
FBgn0004373	fwd	106.965	134.005	98.1563	150.694	142.37	100.261	89.8138	111.012	82.88	114.747	97.9514	88.5021	74.2315	118.279	74.3648	115.734	119.393	95.851	112.086	119.166	93.5373	123.536	129.903	94.6759	86.0122
FBgn0004374	neb	4.5288	17.0592	17.864	9.566	9.80111	4.70329	1.86046	2.19198	2.34743	2.25719	2.70685	2.53726	1.97879	3.40758	3.87219	2.64301	1.93104	4.72917	4.83864	2.32909	2.01344	1.60959	2.81364	1.63607	1.99418
FBgn0004378	Klp61F	0.135514	0.110954	0	0.154915	0.126739	0.0252865	0	0.146132	0.250393	0	0	0.060411	0	0.179346	0.0933059	0.205567	0.0827587	0	0.711565	0.0319053	0	0.0804794	0.356658	0.216085	0.419827
FBgn0004379	Klp67A	1.35879	1.71979	1.00306	1.12313	0.88717	2.27579	3.86046	0.340975	0.657281	2.70862	1.7434	0.392671	0.213924	1.73368	3.07909	0.557968	0.524138	1.90142	2.73241	0.47858	0.656555	1.09988	2.13995	0.308692	0.472306
FBgn0004380	Klp64D	102.239	119.026	112.677	84.5062	82.718	128.152	126.884	106.116	124.007	102.969	90.3814	72.6442	77.0125	114.483	108.328	95.7649	95.1173	105.602	96.5736	90.6749	89.2478	127.855	128.595	86.1869	88.2162
FBgn0004381	Klp68D	88.5147	100.497	92.9022	76.6829	74.9447	100.716	107.302	98.2983	100.658	100.178	83.5913	66.2104	59.0162	95.5915	81.4094	76.9115	82.6483	88.1966	81.3461	84.6448	87.6283	110.793	126.138	71.061	76.9859
FBgn0004387	Klp98A	78.7352	98.1111	66.6794	88.8051	81.7464	82.4088	72.7906	81.9558	68.9832	76.9495	76.1131	65.0928	46.3679	78.3743	63.7745	86.6612	81.9862	76.4468	78.3006	87.1972	84.3017	87.8835	108.147	75.1048	75.464
FBgn0004389	bnk	0.0295632	0.0832156	0.0477646	0.0774575	0	0	0	0	0	0.0410397	0.0917577	0	0	0	0	0	0	0.0975086	0.199238	0.0319053	0	0	0.0396287	0	0
FBgn0004390	RasGAP1	46.8072	52.9806	37.9251	42.3305	37.6413	69.9172	44.5116	48.2967	34.5542	57.2094	48.5398	38.0891	30.0563	67.6135	46.5596	45.1954	47.5586	53.776	60.3691	44.6036	40.3563	51.4263	59.879	29.8197	34.1635
FBgn0004391	shtd	11.8958	14.8124	12.2755	13.0516	11.2375	14.6915	10.6977	8.6218	9.38973	19.7812	13.9931	10.2397	10.616	13.3912	10.4036	10.4839	10.9793	11.8961	12.8651	11.8688	12.3432	9.92579	13.236	9.19903	9.4986
FBgn0004394	pdm2	8.11908	12.5378	8.45434	3.71796	4.68933	19.5465	8.32557	9.20633	9.17064	10.9166	8.30408	6.55459	6.92578	7.41298	7.65108	4.22881	4.85517	9.01955	11.1858	5.23247	4.28949	9.36243	13.3152	4.44517	5.51024
FBgn0004395	unk	86.105	112.563	109.19	79.8587	71.6495	149.014	106.186	97.1779	67.1679	80.6021	83.4537	74.1545	77.574	98.1323	80.5229	60.4367	65.9311	104.676	101.611	66.1397	39.3058	128.257	86.0736	63.3436	63.4989
FBgn0004396	CrebA	29.525	34.8673	33.7696	26.6841	28.3894	32.6449	21.5814	27.278	26.0409	35.6635	27.5273	40.1129	42.3569	34.2551	34.2432	26.4888	25.4069	34.5181	34.3259	30.4696	25.5619	23.9828	18.3877	23.8928	20.1517
FBgn0004397	Vinc	203.01	198.219	157.671	189.926	201.134	160.974	154.279	210.82	205.886	244.145	236.643	183.438	151.565	227.56	198.835	204.921	217.738	177.953	175.614	256.232	301.578	204.525	269	152.401	191.179
FBgn0004400	rhi	1.05249	0.0277385	0.191059	0.116186	0.0844924	2.30107	1.76744	8.08598	10.2974	0.123119	0.0917577	0.453082	0.561549	0.149455	0.233265	0.117467	0.110345	0	0.0569252	0.191432	0	0.0268265	0.118886	0.154346	0
FBgn0004401	Pep	527.757	650.968	643.533	331.015	344.053	796.576	700.092	421.47	531.741	762.108	576.697	363.765	412.819	610.375	739.309	398.624	434.124	577.349	679.288	350.48	444.006	446.258	686.052	317.027	448.428
FBgn0004403	RpS14a	646.984	466.09	689.1	666.251	786.286	543.155	946.696	509.441	829.833	533.394	463.468	582.815	589.627	464.178	853.329	603.809	587.973	660.816	574.887	534.446	805.156	453.635	607.35	814.268	961.615
FBgn0004404	RpS14b	202.639	145.627	211.215	130.942	141.482	190.61	396.697	184.395	294.493	182.052	159.383	186.609	178.065	147.662	268.861	208.533	192.579	212.081	171.544	148.232	238.286	125.172	178.924	271.495	298.392
FBgn0004406	PolG1	4.88403	5.15936	3.39129	3.52432	2.78825	7.86411	2.09302	4.06735	5.41475	7.34611	7.1571	2.29562	3.95759	5.52984	8.07096	4.96298	5.37931	7.70318	6.74563	3.86054	5.47129	3.54109	5.66691	3.17953	2.04666
FBgn0004414	msopa	0.023763	0.055477	0	0	0	0.0758596	0	0.0243554	0	0.0820795	0	0.120822	0	0	0	0	0	0	0.0284626	0.095716	0.0875407	0	0	0	0
FBgn0004419	me31B	73.054	83.7148	70.8827	76.7217	75.4517	97.783	86.1394	78.9358	79.9379	77.0726	69.3689	52.9502	54.5238	75.983	77.5838	74.7677	73.1586	63.2831	70.3595	66.9693	55.6759	84.8789	79.0989	66.7084	61.3473
FBgn0004425	LysB	0.100752	0	0	0.0774575	0.0844924	0.0505731	0	0.0487107	0.0938973	0.123119	0	0.120822	0	0	0	0	0	0	0	0	0.306392	0	0	1.51259	0
FBgn0004426	LysC	0.0121263	0	0.143294	0	0	0	0	0.0243554	0	0	0	0.0302055	0	0	0	0.0293667	0	0	0	0.0638106	0	0	0	0	0
FBgn0004427	LysD	0.506892	0.0277385	0.191059	0.0774575	0.0422462	0.0252865	0	0	0.187795	0	0.0458789	0.0906165	0	0	0	0	0	0.195017	0.227701	0	0.218852	0.0536529	0.0396287	10.7425	0
FBgn0004428	LysE	0.0484536	0	0	0.0387288	0	0	0	0.0243554	0.0625982	0	0	0.0302055	0	0	0	0.0293667	0.0827587	0	0.0284626	0.0638106	0	0	0	0.8026	0
FBgn0004429	LysP	1.28957	0	0	0	0.0422462	0	0.0465116	0.0243554	0	0.287278	0	0	0	0	0	0	0	0	0	0	0.0437704	2.8436	0	27.5045	0.157435
FBgn0004430	LysS	0.14036	0	0	0.348559	0.422462	0.101146	0	0.0243554	0	0.0410397	0.367031	0.211438	0.0267404	0.029891	0.233265	0.117467	0.0551724	0.243772	0.199238	0.446674	0.175081	0.0536529	0	0.0617384	0.209914
FBgn0004431	LysX	0.040376	0.055477	0.429882	0.0774575	0	0.0758596	0	0.0243554	0	0	0	0	0	0.029891	0	0.0587335	0.0275862	0.0975086	0.0284626	0.0638106	0	0	0	0	0
FBgn0004432	Cyp1	450.85	389.809	411.445	528.957	530.781	413.409	342.558	407.806	492.648	404.036	352.809	458.459	449.721	427.442	495.034	611.151	572	387.109	447.773	446.451	516.884	327.819	395.574	519.838	490.883
FBgn0004435	Galphaq	161.814	184.628	203.334	132.878	134.216	213.722	266.325	166.883	177.56	164.036	166.54	141.694	168.304	175.102	172.849	108.305	122.345	180.976	176.923	130.461	91.9615	206.456	169.492	102.393	126.158
FBgn0004436	Ubc6	179.254	191.424	175.057	201.661	173.801	199.384	150	199.422	173.397	142.9	163.375	179.028	177.744	163.265	142.945	188.652	214.621	166.008	179.514	245.129	172.105	191.836	156.177	180.585	174.071
FBgn0004449	Ten-m	206.323	251.893	206.964	254.138	224.538	219.184	173.069	208.36	143.819	226.17	203.473	177.548	159.747	254.731	173.642	181.956	200.524	216.957	239	211.915	164.226	268.828	263.967	171.293	155.808
[truncated: 15,527 more rows]
