# Supplementary material for: Drosulfakinin signaling encodes early-life memory for adaptive social plasticity
Source: eLife. 2024 Dec 18;13:e103973. doi: 10.7554/eLife.103973 (PMC11706606; doi:10.7554/eLife.103973)
Supplement: Figure 5—source data 3. [file elife-103973-fig5-data3.xlsx]

## Sheet: Grouped vs Isolated
GeneID (r6.57)	This Data	log2FoldChange	adj. p value	Wang et al., 2008	Agrawal et al., 2020	Li et al., 2022	Note
FBgn0000147	aurA	1.20924	2.04068e-05	NA	NA	NA	Grouped up
FBgn0000357	Cp18	1.17688	0.000424017	NA	NA	NA	Grouped up
FBgn0000500	Dsk	2.00091	2.27677e-21	YES	YES	YES	Grouped up
FBgn0003060	CG9757	3.00063	1.74867e-06	NA	NA	NA	Grouped up
FBgn0004360	Wnt2	1.16893	0.0083371	NA	NA	NA	Grouped up
FBgn0004379	Klp67A	1.81404	1.94747e-11	NA	NA	NA	Grouped up
FBgn0010019	Cyp4g1	1.8778	0.0229063	NA	NA	NA	Grouped up
FBgn0010258	Rbp4	1.05392	0.00123409	NA	NA	NA	Grouped up
FBgn0011581	Ms	1.07613	1.63533e-10	NA	NA	NA	Grouped up
FBgn0014465	Cp7Fb	1.06665	0.0292244	NA	NA	NA	Grouped up
FBgn0015550	tap	1.61755	0.00948095	NA	NA	NA	Grouped up
FBgn0021742	C901	1.03074	8.5e-05	NA	NA	NA	Grouped up
FBgn0025739	pon	1.07029	7.39418e-05	NA	NA	NA	Grouped up
FBgn0026085	dgt4	1.24129	0.00177013	NA	NA	NA	Grouped up
FBgn0026874	CG13358	1.03731	0.0485072	NA	NA	NA	Grouped up
FBgn0028374	Hug	1.42027	7.95615e-11	NA	NA	NA	Grouped up
FBgn0029644	CG14421	1.14223	0.0219536	NA	NA	NA	Grouped up
FBgn0029810	CG12239	1.35597	4.66721e-12	NA	NA	NA	Grouped up
FBgn0029924	CG4586	1.26629	2.52912e-05	NA	NA	NA	Grouped up
FBgn0030009	CG15336	2.84424	0.0177526	NA	NA	NA	Grouped up
FBgn0030222	CG9806	1.68138	0.0361856	NA	NA	NA	Grouped up
FBgn0030242	sofe	1.0643	2.36663e-07	NA	NA	NA	Grouped up
FBgn0030374	CG15734	2.37204	0.0124774	NA	NA	NA	Grouped up
FBgn0030455	CG4318	1.44171	0.00569232	NA	NA	NA	Grouped up
FBgn0030459	CG12723	1.01784	0.0317819	NA	NA	NA	Grouped up
FBgn0030501	BthD	1.19334	0.000681285	NA	NA	NA	Grouped up
FBgn0030721	CG12698	1.99717	1.17086e-06	NA	NA	NA	Grouped up
FBgn0030938	CG15047	1.22714	0.00599796	NA	NA	NA	Grouped up
FBgn0030949	Cyp308a1	1.21976	0.0183639	NA	NA	NA	Grouped up
FBgn0031108	CG15459	1.20926	0.0241355	NA	NA	NA	Grouped up
FBgn0031171	CG1801	1.66358	0.0284735	NA	NA	NA	Grouped up
FBgn0031273	CG2839	4.11114	2.70034e-06	NA	NA	NA	Grouped up
FBgn0031580	CG15423	1.94746	0.0182823	NA	NA	NA	Grouped up
FBgn0031622	CG3251	2.27796	0.0164824	NA	NA	NA	Grouped up
FBgn0031837	DIP-ι	1.09314	0.00755659	NA	NA	NA	Grouped up
FBgn0031886	Nuf2	1.35893	0.000525372	NA	NA	NA	Grouped up
FBgn0032069	LManVI	1.33832	0.00905756	NA	NA	NA	Grouped up
FBgn0032284	CG7294	1.01009	0.0187756	NA	NA	NA	Grouped up
FBgn0032336	AstC	1.06312	1.25288e-07	NA	NA	NA	Grouped up
FBgn0032503	CG16825	1.76178	0.0242559	NA	NA	NA	Grouped up
FBgn0032525	Hsp60D	1.37359	0.00359179	NA	NA	NA	Grouped up
FBgn0033090	CG15909	1.06308	0.0482591	NA	NA	NA	Grouped up
FBgn0033354	FANCI	1.15003	1.12286e-05	NA	NA	NA	Grouped up
FBgn0033374	Boot	1.51023	0.049842	NA	NA	NA	Grouped up
FBgn0033593	Listericin	1.59707	1.45915e-11	NA	NA	NA	Grouped up
FBgn0033736	CG13154	1.55852	0.0455371	NA	NA	NA	Grouped up
FBgn0033885	DJ-1α	1.32343	6.36198e-06	NA	NA	NA	Grouped up
FBgn0033926	Arc1	1.5872	9.26274e-07	NA	NA	NA	Grouped up
FBgn0034249	RhoGAP54D	1.00984	0.00151524	NA	NA	NA	Grouped up
FBgn0034505	CG16739	1.23313	0.000192696	NA	NA	NA	Grouped up
FBgn0034692	CG13502	1.07667	3.15768e-05	NA	NA	NA	Grouped up
FBgn0034730	ppk12	1.90134	0.0299709	NA	NA	NA	Grouped up
FBgn0034741	CG4269	1.37119	0.00334184	YES	NA	NA	Grouped up
FBgn0034907	CG5539	1.20647	0.0410506	NA	NA	NA	Grouped up
FBgn0034935	Orcokinin	1.53473	4.36913e-09	NA	NA	NA	Grouped up
FBgn0035167	Gr61a	1.54681	0.00108821	NA	NA	NA	Grouped up
FBgn0035607	CG4835	1.38569	0.0398158	NA	NA	NA	Grouped up
FBgn0035619	Alp10	4.30385	0.000303984	NA	NA	NA	Grouped up
FBgn0035620	Alp9	3.50055	0.018387	NA	NA	NA	Grouped up
FBgn0035665	Jon65Aiii	2.50676	0.0350969	NA	NA	NA	Grouped up
FBgn0035670	CG10472	1.07456	3.27379e-05	NA	NA	NA	Grouped up
FBgn0035737	Cpr65Ec	1.54887	0.00481939	NA	NA	NA	Grouped up
FBgn0035928	CG13310	1.37782	0.029595	NA	NA	NA	Grouped up
FBgn0036655	CG13031	3.44388	0.0130366	NA	NA	NA	Grouped up
FBgn0037183	CG14451	2.72789	3.14565e-05	NA	NA	NA	Grouped up
FBgn0037191	CG14448	2.95644	0.00529229	NA	NA	NA	Grouped up
FBgn0037581	CG7352	1.09418	1.03425e-05	NA	NA	NA	Grouped up
FBgn0037626	CG8236	1.40102	0.00124918	NA	NA	NA	Grouped up
FBgn0037627	CG13318	1.3492	0.0011545	NA	NA	NA	Grouped up
FBgn0037746	CG8478	1.04	0.00651434	NA	NA	NA	Grouped up
FBgn0037844	CG4570	1.07804	0.00402793	NA	NA	NA	Grouped up
FBgn0037879	scpr-C	1.2034	0.0149803	NA	NA	NA	Grouped up
FBgn0038142	CheA87a	1.16314	7.98029e-05	NA	NA	NA	Grouped up
FBgn0038160	CG9759	2.74932	1.57882e-12	NA	NA	NA	Grouped up
FBgn0038207	CG14356	1.14573	0.036087	NA	NA	NA	Grouped up
FBgn0038492	Mur89F	2.22577	0.000898355	NA	NA	NA	Grouped up
FBgn0038507	CG5863	2.2526	0.0108131	NA	NA	NA	Grouped up
FBgn0038530	AttD	2.09767	0.00331756	NA	NA	NA	Grouped up
FBgn0039198	CG5768	1.45681	0.0143558	NA	NA	NA	Grouped up
FBgn0039202	CG13622	1.45129	0.0165177	NA	NA	NA	Grouped up
FBgn0039251	Trf4-2	2.3781	1.51541e-05	NA	NA	NA	Grouped up
FBgn0039354	Lgr3	1.04383	2.93522e-16	NA	NA	NA	Grouped up
FBgn0039454	CG14247	1.10926	0.0199197	NA	NA	NA	Grouped up
FBgn0039622	eIF4E6	1.0575	0.000203769	NA	NA	NA	Grouped up
FBgn0039675	ppk21	1.05961	0.0182305	NA	NA	NA	Grouped up
FBgn0039780	PH4αNE1	1.1644	1.60756e-05	NA	NA	NA	Grouped up
FBgn0039782	CG15539	1.37077	0.00288743	NA	NA	NA	Grouped up
FBgn0040333	brv3	1.00334	4.12534e-05	NA	NA	NA	Grouped up
FBgn0040342	CG3706	1.22817	0.000266824	NA	NA	NA	Grouped up
FBgn0040629	CAH5	3.25641	0.000539805	NA	YES	NA	Grouped up
FBgn0040684	CG12589	2.09797	0.0158374	NA	NA	NA	Grouped up
FBgn0040801	CG13053	2.26733	0.00718439	NA	NA	NA	Grouped up
FBgn0040837	CG8620	1.18193	0.0197208	NA	NA	NA	Grouped up
FBgn0040906	CG15579	1.01527	0.000282641	NA	NA	NA	Grouped up
FBgn0043791	phu	2.91121	0.000878698	NA	NA	YES	Grouped up
FBgn0050295	Ipk1	1.01585	0.00257656	NA	NA	NA	Grouped up
FBgn0051148	Gba1a	1.75157	0.00377925	NA	NA	NA	Grouped up
FBgn0051371	CG31371	1.78516	0.00847156	NA	NA	NA	Grouped up
FBgn0051386	lncRNA:CR31386	1.96575	0.00484694	NA	NA	NA	Grouped up
FBgn0051415	CG31415	1.15618	0.0013019	NA	NA	NA	Grouped up
FBgn0051659	CG31659	1.19838	0.0418221	NA	NA	NA	Grouped up
FBgn0051797	CG31797	1.66955	0.0317167	NA	NA	NA	Grouped up
FBgn0051832	CG31832	1.31777	0.00411825	NA	NA	NA	Grouped up
FBgn0052580	Muc14A	2.13479	2.62301e-06	NA	NA	NA	Grouped up
FBgn0052793	CG32793	1.54709	0.0486228	NA	NA	NA	Grouped up
FBgn0053127	CG33127	2.84601	0.018387	NA	NA	NA	Grouped up
FBgn0058005	CR40005	1.66715	0.0158671	NA	NA	NA	Grouped up
FBgn0058354	CR40354	1.22605	0.0116259	NA	NA	NA	Grouped up
FBgn0085243	CG34214	1.40705	0.00757169	NA	NA	NA	Grouped up
FBgn0085734	CR40450	1.16032	0.0093039	NA	NA	NA	Grouped up
FBgn0086695	hd	1.01039	3.58173e-07	NA	NA	NA	Grouped up
FBgn0259195	CG42299	1.81583	0.00564908	NA	NA	NA	Grouped up
FBgn0260780	wisp	1.41953	9.77764e-11	NA	NA	NA	Grouped up
FBgn0261429	lncRNA:CR42646	2.12922	0.00167601	NA	NA	NA	Grouped up
FBgn0261700	lncRNA:CR42736	1.08617	0.0320534	NA	NA	NA	Grouped up
FBgn0262524	ver	1.00417	3.13628e-06	NA	NA	NA	Grouped up
FBgn0262825	lncRNA:CR43196	2.09351	0.000563112	NA	NA	NA	Grouped up
FBgn0263143	vret	1.26636	1.5014e-07	NA	NA	NA	Grouped up
FBgn0263379	lncRNA:CR43431	1.02596	0.000675965	NA	NA	NA	Grouped up
FBgn0264084	lncRNA:CR43753	1.55722	0.0310145	NA	NA	NA	Grouped up
FBgn0264373	lncRNA:CR43825	2.80404	0.0251088	NA	NA	NA	Grouped up
FBgn0264569	lncRNA:CR43941	1.92934	0.027561	NA	NA	NA	Grouped up
FBgn0264710	asRNA:CR43979	2.39154	0.0481545	NA	NA	NA	Grouped up
FBgn0265104	lncRNA:CR44206	1.2956	7.61034e-05	NA	NA	NA	Grouped up
FBgn0265531	asRNA:CR44381	1.32882	0.0157122	NA	NA	NA	Grouped up
FBgn0265585	lncRNA:CR44412	1.21708	0.0409428	NA	NA	NA	Grouped up
FBgn0265693	lncRNA:CR44500	1.06442	0.000169781	NA	NA	NA	Grouped up
FBgn0266095	lncRNA:CR44832	1.01508	6.24838e-06	NA	NA	NA	Grouped up
FBgn0266102	CR44839	1.48243	0.0478387	NA	NA	NA	Grouped up
FBgn0266114	asRNA:CR44840	2.26224	0.00209144	NA	NA	NA	Grouped up
FBgn0266220	lncRNA:CR44915	1.07775	0.0438187	NA	NA	NA	Grouped up
FBgn0266263	asRNA:CR44958	1.44532	0.005747	NA	NA	NA	Grouped up
FBgn0266317	asRNA:CR44982	1.54899	0.0424324	NA	NA	NA	Grouped up
FBgn0266616	lncRNA:CR45123	2.27321	1.06163e-05	NA	NA	NA	Grouped up
FBgn0266691	lncRNA:CR45181	2.21247	7.10306e-06	NA	NA	NA	Grouped up
FBgn0266705	asRNA:CR45195	1.08783	0.00121282	NA	NA	NA	Grouped up
FBgn0266936	lncRNA:CR45387	1.05016	0.0448482	NA	NA	NA	Grouped up
FBgn0266965	lncRNA:CR45416	1.2805	0.000689308	NA	NA	NA	Grouped up
FBgn0266984	lncRNA:CR45435	1.68919	0.0138808	NA	NA	NA	Grouped up
FBgn0266993	lncRNA:CR45444	1.57993	0.00619114	NA	NA	NA	Grouped up
FBgn0267078	lncRNA:CR45522	2.22771	0.0460324	NA	NA	NA	Grouped up
FBgn0267087	lncRNA:CR45531	1.82315	0.00157197	NA	NA	NA	Grouped up
FBgn0267099	lncRNA:CR45539	2.20298	0.00874136	NA	NA	NA	Grouped up
FBgn0267100	lncRNA:CR45540	2.33524	0.00347962	NA	NA	NA	Grouped up
FBgn0267304	lncRNA:CR45740	1.51843	0.0130456	NA	NA	NA	Grouped up
FBgn0267549	asRNA:CR45889	1.1394	0.0350769	NA	NA	NA	Grouped up
FBgn0267641	lncRNA:CR45979	1.21965	0.00580377	NA	NA	NA	Grouped up
FBgn0267656	lncRNA:CR45994	1.05788	0.0140628	NA	NA	NA	Grouped up
FBgn0267666	lncRNA:CR46004	1.10679	0.00354913	NA	NA	NA	Grouped up
FBgn0267776	asRNA:CR46107	1.41087	0.0141525	NA	NA	NA	Grouped up
FBgn0267800	lncRNA:CR46125	1.80852	0.00927827	NA	NA	NA	Grouped up
FBgn0267801	lncRNA:CR46126	1.54098	0.0279712	NA	NA	NA	Grouped up
FBgn0267808	asRNA:CR46133	1.02115	0.0190465	NA	NA	NA	Grouped up
FBgn0267987	lncRNA:CR46254	1.68464	0.0147292	NA	NA	NA	Grouped up
FBgn0283442	vas	1.4065	0.020313	NA	NA	NA	Grouped up
FBgn0283545	vilya	1.18626	0.0310921	NA	NA	NA	Grouped up
FBgn0284444	ddbt	1.01697	0.00128767	NA	NA	NA	Grouped up
FBgn0287612	lncRNA:CR46481	1.6063	1.9907e-06	NA	NA	NA	Grouped up
FBgn0287620	lncRNA:CR46489	2.24399	5.79976e-05	NA	NA	NA	Grouped up
FBgn0000045	Act79B	-1.10558	0.000144343	NA	NA	NA	Isolated up
FBgn0000052	Pfas	-1.43461	9.40435e-07	NA	NA	YES	Isolated up
FBgn0000053	Gart	-2.15531	1.59227e-13	NA	NA	YES	Isolated up
FBgn0000055	Adh	-1.06704	0.00429053	NA	NA	NA	Isolated up
FBgn0000206	boss	-1.1335	1.18754e-11	NA	NA	NA	Isolated up
FBgn0000261	Cat	-1.12393	3.64493e-09	NA	NA	NA	Isolated up
FBgn0000276	CecA1	-1.46483	0.0368291	NA	YES	NA	Isolated up
FBgn0000277	CecA2	-1.62466	0.01628	NA	YES	NA	Isolated up
FBgn0000337	cn	-1.78617	1.0318e-07	NA	NA	NA	Isolated up
FBgn0000370	crc	-1.28896	6.74661e-09	NA	NA	NA	Isolated up
FBgn0000406	Cyt-b5-r	-2.03597	6.76566e-05	NA	NA	NA	Isolated up
FBgn0000477	DNaseII	-1.60399	3.91898e-06	YES	NA	NA	Isolated up
FBgn0000592	Est-6	-2.57731	4.46589e-16	NA	NA	NA	Isolated up
FBgn0000615	exu	-1.86983	5.4289e-05	NA	NA	NA	Isolated up
FBgn0001083	fw	-1.2171	9.27524e-06	NA	NA	NA	Isolated up
FBgn0001114	Glt	-1.37602	0.0180351	NA	NA	NA	Isolated up
FBgn0001125	Got2	-1.12795	4.12675e-07	NA	NA	NA	Isolated up
FBgn0001187	Hex-C	-2.02449	2.57262e-08	NA	NA	YES	Isolated up
FBgn0001208	Hn	-2.11953	5.62211e-11	NA	NA	NA	Isolated up
FBgn0001225	Hsp26	-1.91292	9.6732e-05	NA	NA	NA	Isolated up
FBgn0001226	Hsp27	-1.32912	0.017047	NA	NA	NA	Isolated up
FBgn0001248	Idh	-1.42902	1.17884e-13	NA	NA	YES	Isolated up
FBgn0001967	NimC3	-1.66583	0.0448798	NA	NA	NA	Isolated up
FBgn0002562	Lsp1α	-3.21004	0.0212922	YES	NA	YES	Isolated up
FBgn0002563	Lsp1β	-5.51412	1.19853e-09	YES	NA	NA	Isolated up
FBgn0002565	Lsp2	-5.57119	3.56092e-10	NA	NA	YES	Isolated up
FBgn0002573	sens	-1.35775	0.000252159	NA	NA	NA	Isolated up
FBgn0002719	Men	-1.03379	1.37205e-10	NA	NA	YES	Isolated up
FBgn0002937	ninaB	-1.32376	1.80464e-17	NA	NA	NA	Isolated up
FBgn0002939	ninaD	-1.99695	3.58569e-05	NA	NA	NA	Isolated up
FBgn0003149	Prm	-1.08793	0.000297442	NA	NA	NA	Isolated up
FBgn0003248	Rh2	-1.09553	0.0010317	NA	NA	NA	Isolated up
FBgn0003388	shd	-1.51527	0.00969529	NA	NA	NA	Isolated up
FBgn0003507	srp	-1.73523	8.51595e-06	YES	NA	NA	Isolated up
FBgn0003731	Egfr	-1.24898	4.86633e-08	NA	NA	NA	Isolated up
FBgn0003867	tsl	-1.59481	1.0341e-11	NA	NA	NA	Isolated up
FBgn0003886	αTub85E	-1.73314	0.00881193	NA	NA	NA	Isolated up
FBgn0003965	v	-1.26366	0.00111933	NA	NA	NA	Isolated up
FBgn0004045	Yp1	-10.5325	9.12243e-43	NA	NA	NA	Isolated up
FBgn0004047	Yp3	-7.02123	8.00043e-30	NA	NA	NA	Isolated up
FBgn0004057	Zw	-1.23991	9.49546e-06	NA	NA	YES	Isolated up
FBgn0004629	Cys	-1.10073	1.34295e-07	NA	NA	NA	Isolated up
FBgn0004646	ogre	-1.11027	1.4285e-09	NA	NA	NA	Isolated up
FBgn0004654	Pgd	-1.35382	3.64493e-09	NA	NA	YES	Isolated up
FBgn0004797	mdy	-1.28164	1.54892e-06	NA	NA	NA	Isolated up
FBgn0005391	Yp2	-9.65913	5.71328e-37	NA	NA	NA	Isolated up
FBgn0005638	slbo	-1.06009	0.000365187	NA	NA	NA	Isolated up
FBgn0010043	GstD7	-2.16576	0.0284104	NA	NA	NA	Isolated up
FBgn0010052	Jhe	-2.03663	0.0141525	NA	NA	NA	Isolated up
FBgn0010053	Jheh1	-1.24005	0.0202654	YES	NA	NA	Isolated up
FBgn0010222	Nmdmc	-1.53453	5.88152e-08	NA	NA	YES	Isolated up
FBgn0010225	Gel	-1.13379	4.53836e-06	NA	NA	NA	Isolated up
FBgn0010241	Mdr50	-2.83853	0.00148255	NA	NA	YES	Isolated up
FBgn0010246	Myo61F	-1.30303	0.00174689	NA	NA	NA	Isolated up
FBgn0010383	Cyp18a1	-2.0092	1.05457e-07	YES	NA	NA	Isolated up
FBgn0010387	Acbp2	-1.42992	2.09588e-13	NA	NA	YES	Isolated up
FBgn0010435	emp	-1.03096	1.54357e-05	NA	NA	NA	Isolated up
FBgn0010497	dmGlut	-1.00637	1.56259e-05	NA	NA	NA	Isolated up
FBgn0011283	Obp28a	-1.23263	0.00595671	NA	NA	NA	Isolated up
FBgn0011705	rost	-2.40737	2.09588e-13	YES	NA	YES	Isolated up
FBgn0011768	Fdh	-1.07353	4.58674e-07	YES	NA	NA	Isolated up
FBgn0011770	Gip	-1.88396	1.56462e-20	NA	NA	NA	Isolated up
FBgn0012036	Aldh	-1.50893	6.79938e-15	NA	NA	YES	Isolated up
FBgn0013272	Gp150	-1.02891	4.47548e-09	NA	NA	NA	Isolated up
FBgn0013275	Hsp70Aa	-1.99693	0.00294078	NA	NA	NA	Isolated up
FBgn0013276	Hsp70Ab	-2.47038	0.000105713	NA	NA	NA	Isolated up
FBgn0013278	Hsp70Bb	-1.60312	0.0216733	NA	NA	NA	Isolated up
FBgn0013279	Hsp70Bc	-1.38203	0.00293152	NA	NA	NA	Isolated up
FBgn0013307	Odc1	-1.93066	3.85361e-06	NA	NA	NA	Isolated up
FBgn0013348	TpnC41C	-1.06906	5.49154e-06	NA	NA	NA	Isolated up
FBgn0013672	mt:ATPase6	-1.00719	0.0191184	NA	NA	NA	Isolated up
FBgn0013674	mt:CoI	-1.08096	0.000101375	NA	NA	NA	Isolated up
FBgn0013675	mt:CoII	-1.02864	0.00841381	NA	NA	NA	Isolated up
FBgn0013676	mt:CoIII	-1.29467	2.841e-07	NA	NA	NA	Isolated up
FBgn0013678	mt:Cyt-b	-1.25468	0.00256371	NA	NA	NA	Isolated up
FBgn0013684	mt:ND5	-1.17845	0.0035866	NA	NA	NA	Isolated up
FBgn0013772	Cyp6a8	-1.91859	0.0264946	NA	NA	YES	Isolated up
FBgn0013773	Cyp6a22	-1.21122	0.00124808	NA	NA	NA	Isolated up
FBgn0013949	Elal	-1.08903	0.00381197	NA	NA	NA	Isolated up
FBgn0014000	Hf	-2.07376	1.07774e-11	NA	NA	NA	Isolated up
FBgn0014019	Rh5	-1.8672	3.23027e-11	NA	NA	NA	Isolated up
FBgn0014031	Agxt	-2.20145	1.09226e-12	NA	NA	YES	Isolated up
FBgn0014863	Mlp84B	-1.41451	5.43629e-12	NA	NA	NA	Isolated up
FBgn0014865	Mtk	-1.80673	0.0254116	NA	YES	NA	Isolated up
FBgn0014931	kipf	-1.20785	0.00217797	NA	NA	NA	Isolated up
FBgn0015522	olf186-M	-1.12108	1.3793e-08	NA	NA	NA	Isolated up
FBgn0015569	α-Est10	-1.39273	0.000341181	NA	NA	YES	Isolated up
FBgn0015570	α-Est2	-2.10246	2.40997e-08	NA	NA	NA	Isolated up
FBgn0015575	α-Est7	-1.48095	1.11849e-10	NA	NA	NA	Isolated up
FBgn0015576	α-Est8	-1.24157	1.40098e-11	NA	NA	NA	Isolated up
FBgn0015622	Cnx99A	-1.1168	1.51907e-13	NA	NA	NA	Isolated up
FBgn0015776	nrv1	-1.15902	4.3502e-06	NA	NA	NA	Isolated up
FBgn0016013	Faa	-1.2147	6.82758e-12	NA	NA	NA	Isolated up
FBgn0016053	pgc	-1.76869	0.037451	NA	NA	NA	Isolated up
FBgn0016122	Acer	-1.3123	0.000160459	NA	NA	NA	Isolated up
FBgn0016715	Reg-2	-1.29213	4.65857e-06	NA	NA	NA	Isolated up
FBgn0017424	asRNA:CR11538	-2.73936	0.0214406	NA	NA	YES	Isolated up
FBgn0017482	T3dh	-1.39356	6.63107e-09	NA	NA	YES	Isolated up
FBgn0020385	pug	-2.37772	1.06468e-12	NA	NA	YES	Isolated up
FBgn0020415	Idgf2	-1.14233	4.01456e-05	NA	NA	NA	Isolated up
FBgn0020513	Paics	-1.92213	9.65191e-12	NA	NA	YES	Isolated up
FBgn0020633	Mcm7	-1.54228	0.00472218	NA	NA	NA	Isolated up
FBgn0020637	Lcp65Ag2	-1.62995	0.00379633	NA	NA	NA	Isolated up
FBgn0020908	Scp1	-2.1667	9.03689e-09	NA	NA	NA	Isolated up
FBgn0022702	Cht2	-1.26858	0.00691959	NA	NA	NA	Isolated up
FBgn0022774	Oat	-1.40916	1.35562e-12	NA	NA	YES	Isolated up
FBgn0023129	aay	-1.18371	7.75789e-11	NA	NA	NA	Isolated up
FBgn0023441	fus	-1.03749	6.32957e-05	NA	NA	NA	Isolated up
FBgn0023477	Taldo	-1.6172	5.76885e-15	YES	NA	YES	Isolated up
FBgn0023479	teq	-1.53921	1.2215e-06	NA	NA	NA	Isolated up
FBgn0023496	Lip1	-2.33976	1.95934e-05	NA	NA	NA	Isolated up
FBgn0023507	D2hgdh	-1.2119	1.9965e-08	NA	NA	YES	Isolated up
FBgn0023535	arg	-1.35862	9.51718e-06	NA	NA	NA	Isolated up
FBgn0024289	Sodh1	-3.02215	6.43174e-20	NA	NA	YES	Isolated up
FBgn0024740	Lip2	-2.77632	1.23853e-09	YES	NA	NA	Isolated up
FBgn0024920	Ts	-1.28219	0.0116277	NA	NA	NA	Isolated up
FBgn0025454	Cyp6g1	-1.33711	0.0264699	NA	NA	YES	Isolated up
FBgn0025583	BomS2	-1.58688	1.69815e-05	NA	NA	NA	Isolated up
FBgn0025595	AkhR	-1.32475	0.00269481	NA	NA	NA	Isolated up
FBgn0025620	CG13360	-2.46243	1.09866e-12	YES	NA	NA	Isolated up
FBgn0026176	SkpB	-1.9429	5.24361e-11	NA	NA	NA	Isolated up
FBgn0026268	Antdh	-1.42887	0.0108021	NA	NA	NA	Isolated up
FBgn0026403	Ndg	-1.53085	0.00094399	NA	NA	NA	Isolated up
FBgn0026409	Mpcp2	-1.21145	3.26887e-34	NA	NA	NA	Isolated up
FBgn0026563	CG1979	-3.55909	3.55928e-14	NA	NA	NA	Isolated up
FBgn0026565	Ass	-3.08043	3.82093e-07	NA	NA	NA	Isolated up
FBgn0026576	Pisd	-1.14787	2.27639e-07	YES	NA	NA	Isolated up
FBgn0026593	CG5707	-1.07984	0.0013081	NA	NA	NA	Isolated up
FBgn0026754	Ugt37C1	-2.07081	0.0174765	NA	NA	NA	Isolated up
FBgn0026755	Ugt37B1	-2.69981	0.012877	NA	NA	NA	Isolated up
FBgn0026756	Ugt37A1	-1.72012	0.00637278	NA	NA	NA	Isolated up
FBgn0026878	CG4325	-1.73934	3.82268e-08	NA	NA	YES	Isolated up
FBgn0027073	Ugt49B1	-1.1894	0.000279487	NA	NA	NA	Isolated up
FBgn0027074	Ugt36F1	-1.22129	0.026192	NA	NA	NA	Isolated up
FBgn0027108	Inx2	-1.22872	2.02975e-11	YES	NA	NA	Isolated up
FBgn0027348	bgm	-2.45717	1.46732e-11	NA	NA	NA	Isolated up
FBgn0027560	Tps1	-1.22361	0.0285229	NA	NA	NA	Isolated up
FBgn0027562	CG10345	-1.60674	2.01309e-05	NA	NA	NA	Isolated up
FBgn0027578	Nepl21	-1.15938	0.0377987	NA	NA	NA	Isolated up
FBgn0027579	mino	-1.32082	1.20668e-05	NA	NA	YES	Isolated up
FBgn0027580	Pcb	-1.24511	2.43563e-09	NA	NA	YES	Isolated up
FBgn0027586	Jhbp14	-1.21865	3.01283e-05	NA	NA	NA	Isolated up
FBgn0027611	LManII	-1.37006	0.000187825	NA	NA	NA	Isolated up
FBgn0027657	glob1	-1.336	1.17589e-07	NA	NA	NA	Isolated up
FBgn0027843	CAH2	-1.0364	1.86644e-08	NA	NA	NA	Isolated up
FBgn0028396	TotA	-2.56624	0.00221581	YES	YES	NA	Isolated up
FBgn0028425	JhI-21	-1.35167	7.72229e-15	NA	NA	NA	Isolated up
FBgn0028479	Mtpα	-1.06089	1.33047e-08	NA	NA	NA	Isolated up
FBgn0028482	bdl	-1.01217	3.29303e-10	NA	NA	NA	Isolated up
FBgn0028494	CG6424	-1.40098	0.00449835	NA	NA	NA	Isolated up
FBgn0028526	CG15293	-2.41573	1.99733e-10	NA	NA	NA	Isolated up
FBgn0028583	lcs	-2.04803	0.0103563	NA	NA	NA	Isolated up
FBgn0028878	CG15269	-3.1959	0.00325455	NA	NA	NA	Isolated up
FBgn0028936	NimB5	-1.05979	0.00321147	NA	NA	NA	Isolated up
FBgn0029648	CG3603	-1.7856	4.14033e-10	YES	NA	NA	Isolated up
FBgn0029662	CG12206	-1.14833	0.0274963	NA	NA	NA	Isolated up
FBgn0029765	CG16756	-2.47122	5.32618e-11	NA	NA	NA	Isolated up
FBgn0029769	frma	-1.17853	0.0317167	NA	NA	NA	Isolated up
FBgn0029823	Shmt	-1.55557	7.97887e-07	NA	NA	YES	Isolated up
FBgn0029828	CG6067	-2.25893	2.33332e-10	NA	NA	NA	Isolated up
FBgn0029831	CG5966	-1.98871	0.000148053	NA	NA	NA	Isolated up
FBgn0029848	Btnd	-2.48006	0.0242217	NA	NA	NA	Isolated up
FBgn0029863	CG3823	-1.30098	7.36235e-08	NA	NA	NA	Isolated up
FBgn0029866	CG3842	-1.15326	6.51559e-05	NA	NA	NA	Isolated up
FBgn0029898	CG14439	-1.08823	1.71048e-07	NA	NA	NA	Isolated up
FBgn0029950	rumpel	-1.04322	1.99192e-07	NA	NA	NA	Isolated up
FBgn0029969	Acat1	-1.05822	1.4285e-09	NA	NA	YES	Isolated up
FBgn0029990	CG2233	-2.83827	6.16339e-12	NA	NA	NA	Isolated up
FBgn0030027	CG1632	-1.22101	7.37538e-12	NA	NA	NA	Isolated up
FBgn0030040	CG15347	-1.27707	0.016439	YES	NA	NA	Isolated up
FBgn0030041	CG12116	-1.04905	0.00394996	NA	NA	NA	Isolated up
FBgn0030073	CG10962	-2.35789	3.74009e-08	NA	NA	YES	Isolated up
FBgn0030157	CG1468	-1.89881	2.73031e-09	NA	NA	NA	Isolated up
FBgn0030159	CG9689	-2.07898	1.28295e-10	NA	NA	NA	Isolated up
FBgn0030160	CG9691	-1.25846	4.4668e-07	NA	NA	NA	Isolated up
FBgn0030218	CG1628	-1.84095	2.08659e-08	NA	NA	NA	Isolated up
FBgn0030234	CG15211	-1.09944	9.06957e-09	NA	NA	NA	Isolated up
FBgn0030239	Pgls	-1.09445	7.87171e-07	NA	NA	YES	Isolated up
FBgn0030261	CG15203	-1.14382	7.91731e-08	NA	NA	NA	Isolated up
FBgn0030262	Vago	-1.66545	1.6833e-05	NA	NA	NA	Isolated up
FBgn0030270	CG15199	-2.24831	2.00278e-09	YES	NA	YES	Isolated up
FBgn0030271	CG15202	-1.05872	8.07777e-15	NA	NA	NA	Isolated up
FBgn0030347	CG15739	-1.01635	0.000205987	NA	NA	NA	Isolated up
FBgn0030348	CG10352	-1.50998	1.8797e-06	NA	NA	NA	Isolated up
FBgn0030394	Cpr11A	-1.67357	0.00130075	NA	NA	NA	Isolated up
FBgn0030451	CG15717	-1.62815	0.00132693	NA	NA	NA	Isolated up
FBgn0030482	Bcat	-1.37114	3.58811e-05	YES	NA	YES	Isolated up
FBgn0030544	CG13403	-1.95663	0.048677	NA	NA	NA	Isolated up
FBgn0030562	CG9400	-1.05365	0.001619	NA	NA	NA	Isolated up
FBgn0030575	CG5321	-1.10719	0.000770387	NA	NA	NA	Isolated up
FBgn0030588	CG9521	-1.03443	0.00190608	NA	NA	NA	Isolated up
FBgn0030592	CG9514	-1.26026	0.0181357	NA	NA	NA	Isolated up
FBgn0030593	CG9512	-1.92148	1.40424e-06	NA	NA	NA	Isolated up
FBgn0030594	fiz	-2.61228	0.000364542	NA	NA	NA	Isolated up
FBgn0030607	dob	-2.4618	1.60291e-09	NA	NA	NA	Isolated up
FBgn0030608	Lsd-2	-1.19435	2.04543e-06	NA	NA	NA	Isolated up
FBgn0030612	Dbct	-1.02297	5.32618e-11	NA	NA	YES	Isolated up
FBgn0030617	CG9095	-1.32448	0.000107335	NA	NA	NA	Isolated up
FBgn0030798	CG13003	-1.33066	6.33343e-09	NA	NA	NA	Isolated up
FBgn0030828	CG5162	-1.56382	6.36617e-05	NA	NA	NA	Isolated up
FBgn0030895	CG7135	-1.58981	2.08659e-08	NA	NA	NA	Isolated up
FBgn0030926	psh	-1.27776	5.08534e-05	NA	NA	NA	Isolated up
FBgn0030968	CG7322	-1.9459	5.59378e-15	NA	NA	YES	Isolated up
FBgn0031012	CG8051	-1.16437	5.22501e-05	NA	NA	YES	Isolated up
FBgn0031111	Obp19c	-1.09457	0.0117709	NA	NA	NA	Isolated up
FBgn0031184	CG14615	-1.31837	7.06662e-05	NA	NA	NA	Isolated up
FBgn0031220	CG4822	-1.51292	0.0171705	NA	NA	NA	Isolated up
FBgn0031305	Iris	-1.92291	0.0178369	NA	NA	NA	Isolated up
FBgn0031389	CG4259	-1.82222	7.45547e-07	NA	NA	NA	Isolated up
FBgn0031414	eys	-1.27238	5.76969e-14	NA	NA	NA	Isolated up
FBgn0031417	CG3597	-2.15232	2.71304e-11	NA	NA	NA	Isolated up
FBgn0031418	CG3609	-1.2347	3.06914e-12	NA	NA	NA	Isolated up
FBgn0031432	Cyp309a1	-1.47304	0.0487059	YES	NA	YES	Isolated up
FBgn0031449	CG31689	-1.21426	4.81804e-08	YES	NA	NA	Isolated up
FBgn0031460	CG15399	-1.24812	0.045545	NA	NA	NA	Isolated up
FBgn0031461	daw	-1.05244	0.00975414	NA	NA	NA	Isolated up
FBgn0031515	CG9664	-1.05531	9.21912e-06	NA	NA	NA	Isolated up
FBgn0031538	CG3246	-1.57029	0.00296016	NA	NA	NA	Isolated up
FBgn0031542	CG15414	-1.39418	0.0218838	NA	NA	NA	Isolated up
FBgn0031558	CG16704	-2.68122	5.55383e-11	NA	NA	NA	Isolated up
FBgn0031559	CG3513	-2.83916	5.3598e-08	NA	NA	NA	Isolated up
FBgn0031561	IM33	-1.48628	9.71405e-08	NA	NA	NA	Isolated up
FBgn0031563	CG10031	-1.79258	2.12753e-06	NA	NA	NA	Isolated up
FBgn0031630	CG15629	-1.19312	5.05571e-06	NA	NA	NA	Isolated up
FBgn0031645	CG3036	-1.30676	8.51437e-09	YES	NA	NA	Isolated up
FBgn0031646	snsl	-1.55726	0.000170758	YES	NA	NA	Isolated up
FBgn0031693	Cyp4ac1	-1.76154	1.25929e-05	NA	NA	NA	Isolated up
FBgn0031694	Cyp4ac2	-1.83287	2.29491e-08	NA	NA	NA	Isolated up
FBgn0031702	fusl	-1.29565	6.44296e-09	NA	NA	NA	Isolated up
FBgn0031734	CG11147	-1.29563	8.2424e-08	NA	NA	NA	Isolated up
FBgn0031746	CG9029	-1.37016	0.00671443	NA	NA	NA	Isolated up
FBgn0031775	CG9150	-1.51201	0.00026341	NA	NA	NA	Isolated up
FBgn0031800	CG9497	-2.09961	1.19008e-08	NA	NA	NA	Isolated up
FBgn0031801	CG9498	-1.82645	1.14882e-07	NA	NA	NA	Isolated up
FBgn0031805	Nepl4	-1.59896	0.0143926	NA	NA	NA	Isolated up
FBgn0031824	CG9547	-1.18421	5.16692e-07	NA	NA	YES	Isolated up
FBgn0031850	Tsp	-1.34471	6.37393e-15	NA	NA	NA	Isolated up
FBgn0031860	Daao2	-2.56207	2.02714e-11	NA	NA	YES	Isolated up
FBgn0031877	Hmgcl	-1.0268	4.435e-05	NA	NA	NA	Isolated up
FBgn0031907	CG5171	-2.18308	2.29032e-12	NA	NA	NA	Isolated up
FBgn0031913	CG5958	-2.25012	2.61794e-10	NA	NA	YES	Isolated up
FBgn0031914	CG5973	-1.05849	5.7684e-06	NA	NA	YES	Isolated up
FBgn0031925	Cyp4d21	-2.17783	3.6504e-05	YES	NA	NA	Isolated up
FBgn0031936	CG13794	-1.31853	1.38268e-09	YES	NA	NA	Isolated up
FBgn0031937	CG13795	-1.82497	7.31315e-06	YES	NA	NA	Isolated up
FBgn0031940	CG7214	-3.46305	1.27602e-05	NA	NA	NA	Isolated up
FBgn0031942	CG7203	-1.90589	0.00274156	NA	NA	NA	Isolated up
FBgn0031957	TwdlE	-1.23104	0.0277411	NA	NA	NA	Isolated up
FBgn0032076	Argl	-2.5647	2.29696e-19	NA	NA	YES	Isolated up
FBgn0032161	CG4594	-1.15722	0.00808062	NA	NA	YES	Isolated up
FBgn0032167	CG5853	-1.07315	0.000995729	NA	NA	NA	Isolated up
FBgn0032213	Sph35	-1.01768	5.94494e-06	NA	NA	NA	Isolated up
FBgn0032262	CG7384	-1.55651	0.0013907	NA	NA	NA	Isolated up
FBgn0032266	CG18302	-2.0349	1.49112e-05	NA	NA	NA	Isolated up
FBgn0032285	CG17108	-1.48313	0.00250941	NA	NA	NA	Isolated up
FBgn0032287	CG6415	-2.08653	5.54639e-08	NA	NA	NA	Isolated up
FBgn0032299	CG17127	-1.24279	0.00550587	NA	NA	NA	Isolated up
FBgn0032322	CG16743	-1.31396	1.60144e-05	NA	NA	NA	Isolated up
FBgn0032414	CG17211	-1.07865	5.50006e-06	NA	NA	NA	Isolated up
FBgn0032415	rho-6	-1.20958	0.0197955	NA	NA	NA	Isolated up
FBgn0032472	CG9928	-2.03536	2.22367e-08	NA	NA	NA	Isolated up
FBgn0032477	Alg7	-1.09158	4.97832e-14	NA	NA	NA	Isolated up
FBgn0032483	CG15482	-1.69128	0.00216748	NA	NA	NA	Isolated up
FBgn0032494	Jhbp13	-1.4464	2.25806e-06	NA	NA	NA	Isolated up
FBgn0032495	CG16820	-1.46567	4.76881e-06	NA	NA	NA	Isolated up
FBgn0032533	CG16888	-3.97674	2.88541e-05	NA	NA	NA	Isolated up
FBgn0032603	CG17928	-1.75611	4.19423e-08	NA	NA	NA	Isolated up
FBgn0032613	Nepl9	-1.68782	0.000104198	NA	NA	NA	Isolated up
FBgn0032639	CG18563	-1.12889	0.049737	NA	YES	NA	Isolated up
FBgn0032668	CG17681	-1.43812	0.00782883	NA	NA	NA	Isolated up
FBgn0032684	Ugt301D1	-1.15468	0.00292697	NA	NA	NA	Isolated up
FBgn0032726	CG10621	-2.66866	5.81512e-07	YES	NA	YES	Isolated up
FBgn0032770	CG13086	-2.35978	1.17297e-08	NA	NA	NA	Isolated up
FBgn0032780	CG13085	-1.07531	0.0130629	NA	NA	NA	Isolated up
FBgn0032783	CG10237	-1.31958	2.47497e-09	NA	NA	NA	Isolated up
FBgn0032785	CG10026	-1.04934	0.00605554	YES	NA	NA	Isolated up
FBgn0032791	CG18094	-1.06724	1.20817e-05	NA	NA	NA	Isolated up
FBgn0032820	Fbp	-1.88768	4.26391e-14	YES	NA	YES	Isolated up
FBgn0032834	CG13965	-1.49348	0.00113817	NA	NA	NA	Isolated up
FBgn0032835	CG16772	-1.75885	6.38249e-07	NA	NA	NA	Isolated up
FBgn0032836	CG10680	-1.59346	0.00129142	NA	NA	NA	Isolated up
FBgn0032864	CG2493	-1.43257	4.63259e-07	NA	NA	NA	Isolated up
FBgn0032889	CG9331	-1.00753	2.13356e-05	NA	NA	NA	Isolated up
FBgn0032896	CG14400	-1.74047	9.36338e-06	NA	NA	NA	Isolated up
FBgn0032945	CG8665	-1.69198	8.66179e-07	NA	NA	NA	Isolated up
FBgn0032981	CG3635	-1.1813	0.0160726	NA	NA	NA	Isolated up
FBgn0033033	scaf	-1.0448	6.52265e-10	NA	NA	NA	Isolated up
FBgn0033041	Or42a	-2.47096	0.0218485	NA	NA	NA	Isolated up
FBgn0033079	Fmo-2	-1.99001	4.84504e-14	NA	NA	YES	Isolated up
FBgn0033139	Tsp42Er	-2.52426	2.08107e-05	NA	NA	NA	Isolated up
FBgn0033170	sPLA2	-1.27057	0.00546677	NA	NA	NA	Isolated up
FBgn0033204	CG2065	-1.38602	0.00023319	NA	NA	NA	Isolated up
FBgn0033246	ACC	-1.15789	7.51243e-10	NA	NA	NA	Isolated up
FBgn0033365	CG8170	-1.30045	0.000155725	NA	NA	NA	Isolated up
FBgn0033366	Ance-4	-1.62728	0.00417949	NA	NA	YES	Isolated up
FBgn0033439	CG1773	-1.36747	0.0132227	NA	NA	NA	Isolated up
FBgn0033464	CG1441	-1.63404	9.4114e-09	YES	NA	NA	Isolated up
FBgn0033518	Prx6c	-1.3054	0.0359005	NA	NA	YES	Isolated up
FBgn0033558	alka	-1.05083	0.000862309	NA	NA	NA	Isolated up
FBgn0033602	Cpr47Ee	-1.39725	0.000151461	YES	NA	NA	Isolated up
FBgn0033644	Tret1l	-1.19759	0.00492184	NA	NA	NA	Isolated up
FBgn0033696	Cyp6g2	-1.04276	0.00247832	NA	NA	NA	Isolated up
FBgn0033702	CG8854	-1.2193	2.26609e-10	NA	NA	NA	Isolated up
FBgn0033728	Cpr49Ae	-1.61576	9.2374e-12	NA	NA	NA	Isolated up
FBgn0033735	Dera	-1.07896	7.64742e-07	NA	NA	YES	Isolated up
FBgn0033742	Nepl10	-1.02586	0.0223385	YES	NA	NA	Isolated up
FBgn0033782	sug	-1.68459	0.000348552	NA	NA	NA	Isolated up
FBgn0033798	CG15870	-1.75763	0.000116923	NA	NA	NA	Isolated up
FBgn0033807	AQP	-1.02541	5.62211e-11	NA	NA	NA	Isolated up
FBgn0033817	GstE14	-1.01356	0.00390932	NA	NA	NA	Isolated up
FBgn0033820	CG4716	-1.46181	0.000155725	NA	NA	NA	Isolated up
FBgn0033821	CG10799	-1.9616	3.15357e-10	NA	NA	NA	Isolated up
FBgn0033867	Cpr50Ca	-1.62008	0.0182199	NA	NA	NA	Isolated up
FBgn0033879	Echs1	-1.08558	3.77426e-08	NA	NA	NA	Isolated up
FBgn0033979	Cyp6a19	-1.91432	0.00510218	NA	NA	NA	Isolated up
FBgn0034045	CG8249	-1.79522	1.30861e-12	NA	NA	YES	Isolated up
FBgn0034140	Lst	-2.5244	2.02714e-11	NA	NA	YES	Isolated up
FBgn0034151	CG15617	-1.60103	0.0301606	NA	NA	NA	Isolated up
FBgn0034162	CG6426	-1.33739	6.34872e-05	NA	NA	NA	Isolated up
FBgn0034165	CG6435	-1.04448	9.57364e-05	NA	NA	NA	Isolated up
FBgn0034198	CG11400	-1.80944	1.72993e-10	NA	NA	NA	Isolated up
FBgn0034229	CtsK2	-1.04983	0.00139325	NA	NA	NA	Isolated up
FBgn0034276	Sardh	-2.24238	2.34068e-05	NA	NA	YES	Isolated up
FBgn0034290	CG5773	-1.04221	0.000670099	YES	NA	NA	Isolated up
FBgn0034293	CG14495	-2.93132	3.36129e-09	NA	NA	NA	Isolated up
FBgn0034322	CG18536	-1.06468	0.00601852	NA	NA	NA	Isolated up
FBgn0034324	CG18538	-1.99162	0.0141525	NA	NA	NA	Isolated up
FBgn0034329	BomS1	-1.42916	2.3212e-05	NA	NA	NA	Isolated up
FBgn0034330	BomS4	-1.61033	0.000362585	NA	NA	NA	Isolated up
FBgn0034331	BomBc2	-1.77412	4.02777e-06	NA	NA	NA	Isolated up
FBgn0034356	Pepck2	-1.46428	0.0318799	YES	NA	NA	Isolated up
FBgn0034364	CG5493	-2.50841	1.75174e-14	NA	NA	NA	Isolated up
FBgn0034390	CG15093	-2.08789	1.46732e-11	YES	NA	YES	Isolated up
FBgn0034394	CG15096	-2.15497	6.49055e-08	YES	NA	YES	Isolated up
FBgn0034407	DptB	-1.79695	0.0320632	NA	YES	NA	Isolated up
FBgn0034432	Acadvl	-1.18248	3.24728e-08	NA	NA	NA	Isolated up
FBgn0034439	CG10062	-1.14617	0.00751582	NA	NA	NA	Isolated up
FBgn0034440	CG10073	-2.08194	0.00268756	NA	NA	NA	Isolated up
FBgn0034454	CG15120	-1.50535	0.0386972	NA	NA	NA	Isolated up
FBgn0034471	Obp56e	-1.78884	9.77184e-06	NA	NA	NA	Isolated up
FBgn0034480	CG16898	-2.12344	0.0117804	NA	NA	NA	Isolated up
FBgn0034494	CG10444	-1.01792	0.000102573	NA	NA	YES	Isolated up
FBgn0034511	GNBP-like3	-1.35935	0.0275764	NA	YES	NA	Isolated up
FBgn0034538	CG16799	-1.02654	0.000175419	NA	NA	NA	Isolated up
FBgn0034624	CG17974	-1.49826	0.00104922	NA	NA	NA	Isolated up
FBgn0034628	Acox57D-p	-1.50349	3.98947e-07	NA	NA	YES	Isolated up
FBgn0034629	Acox57D-d	-2.56853	6.5429e-05	NA	NA	NA	Isolated up
FBgn0034660	Loxl2	-1.12422	0.00249518	NA	NA	NA	Isolated up
FBgn0034717	CG5819	-1.68535	0.000115763	NA	NA	NA	Isolated up
FBgn0034733	CG4752	-1.09536	5.89715e-06	NA	NA	YES	Isolated up
FBgn0034860	CG9812	-1.23198	6.18556e-06	NA	NA	NA	Isolated up
FBgn0034870	CG13559	-1.76571	5.72348e-07	NA	NA	NA	Isolated up
FBgn0034885	Eglp4	-2.26061	1.08185e-21	NA	NA	NA	Isolated up
FBgn0034909	pippin	-1.07215	3.20442e-07	NA	NA	NA	Isolated up
FBgn0034943	Fmo-1	-1.47511	0.000165121	NA	NA	NA	Isolated up
FBgn0035044	CG3663	-1.16774	5.16989e-07	NA	NA	NA	Isolated up
FBgn0035076	Ance-5	-1.09343	0.0460324	NA	NA	NA	Isolated up
FBgn0035089	Phk-3	-1.09501	0.000172737	NA	NA	NA	Isolated up
FBgn0035090	CG2736	-1.83342	0.00119643	NA	NA	NA	Isolated up
FBgn0035091	CG3829	-1.34342	0.000907714	NA	NA	YES	Isolated up
FBgn0035186	CG13912	-2.03211	2.7255e-05	NA	NA	NA	Isolated up
FBgn0035189	CG9119	-1.88981	1.14917e-13	YES	NA	YES	Isolated up
FBgn0035266	Gk2	-1.23171	1.3338e-11	NA	NA	NA	Isolated up
FBgn0035290	dsb	-1.36164	0.00102501	NA	NA	NA	Isolated up
FBgn0035298	Scot	-1.11216	3.62855e-07	NA	NA	YES	Isolated up
FBgn0035344	Cyp4d20	-1.64703	9.73255e-08	NA	NA	NA	Isolated up
FBgn0035348	CG16758	-1.17271	0.000143711	NA	NA	YES	Isolated up
FBgn0035383	CPT2	-1.32232	1.27988e-08	NA	NA	NA	Isolated up
FBgn0035468	Gr63a	-2.70948	2.44107e-06	NA	NA	NA	Isolated up
FBgn0035476	CG12766	-1.04288	0.0268615	NA	NA	NA	Isolated up
FBgn0035484	CG11594	-1.64781	1.16439e-13	YES	NA	YES	Isolated up
FBgn0035734	CG14823	-1.01776	8.5e-05	NA	NA	NA	Isolated up
FBgn0035770	pst	-1.03684	0.000442854	NA	NA	NA	Isolated up
FBgn0035788	CG8541	-2.70241	0.0451284	NA	NA	NA	Isolated up
FBgn0035791	CG8539	-1.86409	2.55831e-11	NA	NA	NA	Isolated up
FBgn0035811	Mcad	-1.09592	4.68584e-07	NA	NA	NA	Isolated up
FBgn0035813	CG8492	-1.18396	0.0132958	NA	NA	NA	Isolated up
FBgn0035817	CG7409	-1.72133	1.14372e-11	NA	NA	NA	Isolated up
FBgn0035918	Cdc6	-2.20048	0.000231265	NA	NA	NA	Isolated up
FBgn0035921	CG13305	-1.40346	2.39249e-07	NA	NA	NA	Isolated up
FBgn0035969	CG4476	-1.52491	0.0034693	NA	NA	NA	Isolated up
FBgn0035978	UGP	-1.57348	5.24266e-17	NA	NA	NA	Isolated up
FBgn0035982	CG4461	-1.54427	5.10982e-18	NA	NA	NA	Isolated up
FBgn0036007	path	-1.26365	2.97386e-09	NA	NA	NA	Isolated up
FBgn0036117	CG6321	-1.0382	0.0214431	NA	NA	NA	Isolated up
FBgn0036157	CG7560	-1.74953	6.65177e-07	YES	NA	YES	Isolated up
FBgn0036208	Gcat	-1.08746	5.63402e-06	NA	NA	YES	Isolated up
FBgn0036262	Miox	-1.62916	1.27988e-08	NA	NA	YES	Isolated up
FBgn0036264	CG11529	-1.31861	0.00160079	NA	NA	NA	Isolated up
FBgn0036359	CG14105	-1.17202	3.71862e-07	NA	NA	NA	Isolated up
FBgn0036428	Gbs-70E	-1.51568	8.24843e-09	NA	NA	NA	Isolated up
FBgn0036436	CG4914	-1.36656	0.017234	NA	NA	NA	Isolated up
FBgn0036501	CG7272	-1.08162	1.08447e-07	NA	NA	NA	Isolated up
FBgn0036547	CG17032	-1.01147	6.02918e-06	NA	NA	NA	Isolated up
FBgn0036622	Agpat4	-1.18219	0.0039199	NA	NA	NA	Isolated up
FBgn0036656	CG13026	-1.53267	1.3793e-08	NA	NA	NA	Isolated up
FBgn0036698	CG7724	-1.38957	1.11056e-05	NA	NA	NA	Isolated up
FBgn0036715	Cad74A	-1.01712	0.0315762	NA	NA	NA	Isolated up
FBgn0036727	SecCl	-1.10842	0.0163636	NA	NA	NA	Isolated up
FBgn0036742	CG7497	-1.06218	9.8776e-05	NA	NA	NA	Isolated up
FBgn0036756	Cln3	-1.71106	1.39169e-10	NA	NA	NA	Isolated up
FBgn0036759	CG5577	-1.15109	1.19008e-08	NA	NA	NA	Isolated up
FBgn0036764	CG5535	-1.18703	8.0115e-06	NA	NA	NA	Isolated up
FBgn0036787	CG4306	-1.89605	6.84824e-05	NA	NA	NA	Isolated up
FBgn0036816	Indy	-1.04496	2.50709e-07	NA	NA	NA	Isolated up
FBgn0036824	CG3902	-1.30919	1.68738e-09	NA	NA	YES	Isolated up
FBgn0036857	Aldh7A1	-1.07903	1.08672e-06	NA	NA	YES	Isolated up
FBgn0036875	CG9449	-1.34141	0.000122839	NA	NA	NA	Isolated up
FBgn0036910	Cyp305a1	-1.21577	0.000287649	NA	NA	NA	Isolated up
FBgn0036985	zye	-1.36945	2.44245e-05	NA	NA	NA	Isolated up
FBgn0036992	Hpd	-1.33632	5.35895e-16	NA	NA	NA	Isolated up
FBgn0036995	atk	-1.90871	0.0011978	YES	YES	YES	Isolated up
FBgn0036996	mag	-5.56715	5.35281e-07	NA	NA	NA	Isolated up
FBgn0037000	ZnT77C	-1.89573	3.95739e-12	YES	NA	NA	Isolated up
FBgn0037090	Est-Q	-1.90417	0.0018563	NA	NA	NA	Isolated up
FBgn0037126	CG14567	-1.28553	8.10918e-05	NA	NA	NA	Isolated up
FBgn0037144	CG7458	-1.28103	0.00140498	NA	NA	NA	Isolated up
FBgn0037146	P5CS	-1.55813	0.000836015	NA	NA	NA	Isolated up
FBgn0037162	CG11449	-2.1967	0.0313023	NA	NA	NA	Isolated up
FBgn0037164	CG11438	-1.14718	0.000106671	NA	NA	NA	Isolated up
FBgn0037165	CG11437	-1.47017	0.00551548	NA	NA	NA	Isolated up
FBgn0037166	CG11426	-4.11	7.69884e-15	NA	NA	NA	Isolated up
FBgn0037228	CG1092	-1.87218	3.85665e-05	YES	NA	NA	Isolated up
FBgn0037230	Nepl11	-1.02086	0.0157643	NA	NA	YES	Isolated up
FBgn0037386	CG1208	-1.08777	2.2762e-08	NA	NA	NA	Isolated up
FBgn0037387	CG1213	-1.21186	3.23946e-07	NA	NA	NA	Isolated up
FBgn0037396	CtsL3	-1.97016	9.61631e-08	NA	YES	NA	Isolated up
FBgn0037410	Osi2	-1.23264	0.000437423	NA	NA	NA	Isolated up
FBgn0037419	Osi12	-1.84764	0.0219536	NA	NA	NA	Isolated up
FBgn0037464	Mst84B	-1.95325	0.0324488	NA	NA	NA	Isolated up
FBgn0037488	CG14607	-3.35863	0.000210851	NA	NA	NA	Isolated up
FBgn0037548	CG7900	-1.19891	0.000434063	NA	NA	NA	Isolated up
FBgn0037553	CG18249	-1.45254	0.00278452	NA	NA	NA	Isolated up
FBgn0037562	Nazo	-2.55415	0.0101305	NA	NA	NA	Isolated up
FBgn0037607	CG8036	-1.28289	0.00053807	YES	NA	YES	Isolated up
FBgn0037684	Srr	-1.88788	9.27923e-11	NA	NA	NA	Isolated up
FBgn0037709	Bckdha	-1.14316	1.45266e-07	NA	NA	YES	Isolated up
FBgn0037714	CG9396	-2.09901	2.15143e-08	NA	NA	YES	Isolated up
FBgn0037730	CG9444	-1.05487	9.39407e-08	NA	NA	NA	Isolated up
FBgn0037779	CG12811	-1.24211	1.2498e-09	YES	NA	NA	Isolated up
FBgn0037801	CG3999	-2.35829	2.61486e-08	NA	NA	YES	Isolated up
FBgn0037807	CG6293	-1.5536	1.67925e-10	NA	NA	NA	Isolated up
FBgn0037818	CG6465	-1.06898	0.00209546	NA	NA	NA	Isolated up
FBgn0037819	Phyhd1	-1.00973	9.66304e-06	YES	NA	NA	Isolated up
FBgn0037896	ninaG	-1.32113	1.40798e-08	NA	NA	NA	Isolated up
FBgn0037934	CG6830	-1.05166	0.00283215	NA	NA	YES	Isolated up
FBgn0037935	CG6834	-1.15147	2.45448e-07	NA	NA	NA	Isolated up
FBgn0037936	CG6908	-1.22525	0.000924158	NA	NA	NA	Isolated up
FBgn0037973	CG18547	-1.6269	4.14803e-08	YES	NA	YES	Isolated up
FBgn0037974	CG12224	-1.42737	0.0422833	NA	NA	NA	Isolated up
FBgn0037975	CG3397	-2.35779	0.0249685	YES	NA	NA	Isolated up
FBgn0037988	Cs2	-1.87542	0.0316219	NA	NA	NA	Isolated up
FBgn0038074	Gnmt	-3.71097	7.41576e-14	NA	NA	NA	Isolated up
FBgn0038105	yellow-f2	-1.5013	0.000177421	YES	NA	NA	Isolated up
FBgn0038115	CG7966	-1.28099	5.72805e-11	YES	NA	NA	Isolated up
FBgn0038147	CCHa2	-1.63396	5.22288e-15	NA	NA	NA	Isolated up
FBgn0038181	CG9297	-1.41095	1.02977e-10	NA	NA	NA	Isolated up
FBgn0038194	Cyp6d5	-1.14906	0.000428425	NA	NA	NA	Isolated up
FBgn0038214	CG9616	-1.68027	0.00306355	NA	NA	NA	Isolated up
FBgn0038236	Cyp313a1	-1.99783	5.60738e-05	NA	NA	NA	Isolated up
FBgn0038257	smp-30	-2.53659	2.33112e-30	NA	NA	YES	Isolated up
FBgn0038291	CG3984	-2.01991	0.000155227	YES	NA	YES	Isolated up
FBgn0038302	CG4210	-1.24849	1.91642e-05	NA	NA	NA	Isolated up
FBgn0038398	sxe2	-2.36614	4.95581e-07	NA	NA	NA	Isolated up
FBgn0038466	CG8907	-1.05184	0.0231147	NA	NA	NA	Isolated up
FBgn0038467	Adsl	-1.19602	1.72223e-06	NA	NA	YES	Isolated up
FBgn0038516	P5cr-2	-1.64841	0.00102705	NA	NA	NA	Isolated up
FBgn0038632	CG14301	-1.02556	0.00940578	NA	NA	NA	Isolated up
FBgn0038654	CG14298	-1.02787	9.13765e-06	NA	NA	NA	Isolated up
FBgn0038662	Mpc1	-1.22004	1.28216e-27	NA	NA	NA	Isolated up
FBgn0038676	CG6026	-1.83082	6.72045e-06	NA	NA	NA	Isolated up
FBgn0038681	Cyp12a4	-1.05142	1.72223e-06	NA	NA	NA	Isolated up
FBgn0038716	CG7342	-1.67311	3.16655e-09	NA	NA	NA	Isolated up
FBgn0038732	Acsx2	-1.20108	0.0398911	NA	NA	NA	Isolated up
FBgn0038795	Tmlh	-1.70995	1.95934e-05	NA	NA	NA	Isolated up
FBgn0038819	Cpr92F	-1.31066	0.0349504	NA	NA	NA	Isolated up
FBgn0038820	CG4000	-2.34532	3.63223e-05	NA	NA	NA	Isolated up
FBgn0038858	CG5793	-1.01005	3.56821e-09	NA	NA	NA	Isolated up
FBgn0038878	CG3301	-1.18875	0.00179251	NA	NA	NA	Isolated up
FBgn0038914	fit	-6.11135	5.76885e-15	YES	YES	NA	Isolated up
FBgn0038946	rdhB	-1.32249	2.31215e-05	NA	NA	NA	Isolated up
FBgn0038958	CG13857	-1.5792	0.00371093	NA	NA	NA	Isolated up
FBgn0038959	CG13856	-1.02412	0.000283411	NA	NA	NA	Isolated up
FBgn0038960	CG13855	-1.47446	0.015684	NA	NA	NA	Isolated up
FBgn0038983	CG5326	-1.01565	1.35154e-09	NA	NA	NA	Isolated up
FBgn0038984	AdipoR	-1.29188	2.05852e-10	NA	NA	NA	Isolated up
FBgn0039023	Nepl14	-1.23648	0.00188172	NA	NA	NA	Isolated up
FBgn0039031	Gbp3	-1.73974	3.96861e-07	NA	NA	NA	Isolated up
FBgn0039040	CG13833	-1.8594	0.00012203	NA	NA	NA	Isolated up
FBgn0039073	CG4408	-1.86799	0.00153489	YES	NA	YES	Isolated up
FBgn0039094	CG10184	-1.409	2.25576e-16	NA	NA	YES	Isolated up
FBgn0039099	GILT2	-1.02225	0.000701298	NA	NA	NA	Isolated up
FBgn0039114	Lsd-1	-1.66402	2.87338e-06	NA	NA	NA	Isolated up
FBgn0039118	CG10208	-1.04312	5.07356e-06	NA	NA	YES	Isolated up
FBgn0039131	CG12268	-1.10814	0.0143396	NA	NA	NA	Isolated up
FBgn0039151	CG13607	-1.4886	0.0113137	NA	NA	NA	Isolated up
FBgn0039152	Root	-1.53129	6.74937e-05	NA	NA	NA	Isolated up
FBgn0039207	Cftr	-1.13351	1.84746e-05	NA	NA	NA	Isolated up
FBgn0039237	CG13640	-1.91865	0.013083	NA	NA	NA	Isolated up
FBgn0039239	Srg1	-2.2987	1.70827e-08	NA	NA	NA	Isolated up
FBgn0039241	CG11089	-1.99722	1.17976e-13	NA	NA	YES	Isolated up
FBgn0039298	to	-1.51085	0.00325455	NA	NA	NA	Isolated up
FBgn0039313	CG11892	-1.48504	3.70042e-05	NA	NA	NA	Isolated up
FBgn0039324	CG10553	-2.31341	1.55671e-08	YES	NA	NA	Isolated up
FBgn0039325	CG10560	-1.57255	0.0263183	NA	NA	NA	Isolated up
FBgn0039332	alrm	-1.04118	0.00020567	NA	NA	NA	Isolated up
FBgn0039452	CG14245	-1.16386	0.0440781	NA	NA	NA	Isolated up
FBgn0039483	CG14259	-1.51396	3.55404e-08	NA	NA	NA	Isolated up
FBgn0039486	CAH9	-1.35852	0.00716493	NA	NA	NA	Isolated up
FBgn0039527	CG5639	-1.23589	1.98122e-09	NA	NA	NA	Isolated up
FBgn0039593	Sid	-1.2334	0.0479224	NA	YES	NA	Isolated up
FBgn0039628	CG11841	-1.0705	0.000254346	NA	NA	NA	Isolated up
FBgn0039629	CG11842	-1.15529	3.8631e-05	NA	NA	NA	Isolated up
FBgn0039666	Diedel	-3.21539	0.036087	NA	NA	NA	Isolated up
FBgn0039670	CG7567	-3.52487	0.000461075	YES	NA	NA	Isolated up
FBgn0039678	Obp99a	-7.02602	2.51006e-13	NA	NA	NA	Isolated up
FBgn0039682	Obp99c	-2.0578	6.25606e-10	YES	NA	NA	Isolated up
FBgn0039685	Obp99b	-3.45877	2.95287e-11	YES	NA	NA	Isolated up
FBgn0039719	CG15515	-1.16073	0.00213205	NA	NA	NA	Isolated up
FBgn0039736	CG7912	-1.17096	0.0257025	NA	NA	NA	Isolated up
FBgn0039742	CG15528	-1.04959	4.23693e-08	NA	NA	NA	Isolated up
FBgn0039758	CG9737	-1.88673	0.0273678	NA	NA	NA	Isolated up
FBgn0039800	Npc2g	-1.7424	7.40357e-08	NA	NA	NA	Isolated up
FBgn0039801	Npc2h	-1.93296	4.97436e-05	NA	NA	NA	Isolated up
FBgn0039827	Oadh	-1.69909	6.05668e-13	YES	NA	YES	Isolated up
FBgn0039856	CG1774	-1.75237	1.16174e-14	NA	NA	YES	Isolated up
FBgn0040064	Acaa	-1.20783	1.17359e-06	NA	NA	YES	Isolated up
FBgn0040074	retinin	-1.03892	0.00310061	NA	NA	NA	Isolated up
FBgn0040211	Hgo	-1.11805	0.000166892	NA	NA	NA	Isolated up
FBgn0040256	Ugt35C1	-1.74108	1.42517e-07	NA	NA	YES	Isolated up
FBgn0040257	Ugt302E1	-2.30536	0.000161872	NA	NA	NA	Isolated up
FBgn0040349	CG3699	-3.06982	2.82757e-16	NA	NA	YES	Isolated up
FBgn0040398	CG14629	-1.67436	2.32191e-05	NA	NA	NA	Isolated up
FBgn0040531	CG11741	-2.36761	0.000689231	NA	YES	NA	Isolated up
FBgn0040582	BomBc3	-1.09363	0.0039988	NA	NA	NA	Isolated up
FBgn0040606	CG6503	-2.33796	1.78281e-12	NA	NA	NA	Isolated up
FBgn0040608	CG14246	-1.16303	6.76566e-05	NA	NA	NA	Isolated up
FBgn0040653	Dso1	-1.626	3.08373e-05	NA	NA	NA	Isolated up
FBgn0040732	CG16926	-2.40119	0.00158829	NA	NA	NA	Isolated up
FBgn0040733	BomS6	-1.82701	0.000924158	NA	NA	NA	Isolated up
FBgn0040734	BomS5	-1.15155	0.0422975	NA	NA	NA	Isolated up
FBgn0040735	BomT2	-1.89791	1.23735e-08	NA	NA	NA	Isolated up
FBgn0040827	CG13315	-1.75171	1.91718e-05	NA	NA	NA	Isolated up
FBgn0041194	Prat2	-2.25933	3.64606e-12	NA	NA	NA	Isolated up
FBgn0041250	Gr21a	-2.03546	0.0110268	NA	NA	NA	Isolated up
FBgn0041579	AttC	-2.01903	0.0174106	NA	YES	NA	Isolated up
FBgn0041711	yellow-e	-1.60506	1.02672e-05	NA	NA	NA	Isolated up
FBgn0042129	OS9	-1.37521	0.0175976	NA	NA	NA	Isolated up
FBgn0042201	Nplp3	-1.37814	0.00832533	NA	NA	NA	Isolated up
FBgn0043533	Obp56f	-1.53493	0.0102066	NA	NA	NA	Isolated up
FBgn0043535	Obp57a	-1.5067	3.05531e-11	NA	NA	NA	Isolated up
FBgn0043575	PGRP-SC2	-1.79319	0.0103391	NA	YES	NA	Isolated up
FBgn0043577	PGRP-SB2	-3.02033	0.0457737	NA	NA	NA	Isolated up
FBgn0043578	PGRP-SB1	-1.72786	1.9928e-06	NA	YES	NA	Isolated up
FBgn0043783	Galm1	-2.90061	5.19257e-19	YES	NA	YES	Isolated up
FBgn0043792	CG30427	-1.0737	0.0004121	NA	NA	NA	Isolated up
FBgn0044047	Ilp6	-1.24644	2.02653e-13	NA	NA	NA	Isolated up
FBgn0044810	TotX	-1.48682	0.0103356	NA	NA	NA	Isolated up
FBgn0044812	TotC	-2.67728	0.0102665	NA	YES	NA	Isolated up
FBgn0046875	Obp83g	-1.15002	0.0268615	NA	NA	NA	Isolated up
FBgn0046876	Obp83ef	-1.73139	0.000171381	NA	NA	NA	Isolated up
FBgn0046878	Obp83cd	-1.9036	6.23705e-05	NA	NA	NA	Isolated up
FBgn0050011	gem	-2.14509	0.0034693	NA	NA	NA	Isolated up
FBgn0050026	CG30026	-1.5903	0.00018075	NA	NA	NA	Isolated up
FBgn0050029	CR30029	-2.24169	0.0493951	NA	NA	NA	Isolated up
FBgn0050042	Cpr49Ab	-2.20166	0.000244428	NA	NA	NA	Isolated up
FBgn0050090	Erasp	-1.56302	0.00605203	NA	NA	NA	Isolated up
FBgn0050095	CG30095	-2.07742	0.00245583	NA	NA	NA	Isolated up
FBgn0050148	CG30148	-1.93964	0.00020591	NA	NA	NA	Isolated up
FBgn0050163	Cpr60D	-1.11669	0.0154502	NA	NA	NA	Isolated up
FBgn0050289	CG30289	-1.89342	0.0066577	NA	NA	NA	Isolated up
FBgn0050431	CG30431	-1.16156	0.00227732	NA	NA	NA	Isolated up
FBgn0050438	Ugt50B3	-1.12836	0.00209386	NA	NA	NA	Isolated up
FBgn0050489	Cyp12d1-p	-2.51016	5.57091e-05	NA	NA	NA	Isolated up
FBgn0051104	CG31104	-2.08564	0.000588756	NA	NA	NA	Isolated up
FBgn0051272	CG31272	-1.04793	2.58337e-08	NA	NA	NA	Isolated up
FBgn0051354	Hsp70Bbb	-1.88329	0.000687831	NA	NA	NA	Isolated up
FBgn0051380	CG31380	-1.23961	0.0315238	NA	NA	NA	Isolated up
FBgn0051427	CR31427	-1.62851	0.0309865	NA	NA	NA	Isolated up
FBgn0051495	CG31495	-1.17296	3.97007e-05	NA	NA	NA	Isolated up
FBgn0051548	CG31548	-1.32081	7.21193e-11	NA	NA	NA	Isolated up
FBgn0051636	CG31636	-1.83911	5.08534e-05	NA	NA	NA	Isolated up
FBgn0051664	CG31664	-1.78259	0.00484441	YES	NA	NA	Isolated up
FBgn0051777	CG31777	-1.92829	6.93015e-07	NA	NA	NA	Isolated up
FBgn0051778	CG31778	-2.15133	5.79916e-09	NA	NA	NA	Isolated up
FBgn0051954	CG31954	-2.14885	0.000804038	NA	NA	NA	Isolated up
FBgn0052037	CG32037	-1.10953	0.000846575	NA	NA	NA	Isolated up
FBgn0052068	Adi1	-1.06886	1.76375e-10	NA	NA	NA	Isolated up
FBgn0052115	CG32115	-1.57081	4.3161e-06	NA	NA	NA	Isolated up
FBgn0052191	CG32191	-1.35206	0.0400656	NA	NA	NA	Isolated up
FBgn0052194	lncRNA:CR32194	-1.06246	0.000462978	NA	NA	NA	Isolated up
FBgn0052251	Claspin	-1.59124	0.000224303	NA	NA	NA	Isolated up
FBgn0052512	CG32512	-1.65092	1.42853e-11	NA	NA	NA	Isolated up
FBgn0052667	ssp7	-2.42609	9.36412e-15	YES	NA	NA	Isolated up
FBgn0052687	CG32687	-1.22664	5.30961e-10	NA	NA	NA	Isolated up
FBgn0052695	CG32695	-2.06484	7.37919e-10	NA	NA	YES	Isolated up
FBgn0052750	CG32750	-2.0809	0.00648677	NA	NA	NA	Isolated up
FBgn0053120	CG33120	-1.72087	0.000189821	YES	NA	YES	Isolated up
FBgn0053178	CG33178	-1.00402	0.000125426	NA	NA	NA	Isolated up
FBgn0053192	MtnD	-3.1291	1.68214e-05	YES	NA	NA	Isolated up
FBgn0053301	CG33301	-3.12524	1.70289e-07	NA	NA	NA	Isolated up
FBgn0053307	CG33307	-2.19913	4.3028e-08	NA	NA	YES	Isolated up
FBgn0053458	CG33458	-1.41296	0.0317127	NA	NA	NA	Isolated up
FBgn0053459	CG33459	-3.2653	3.80692e-05	NA	NA	NA	Isolated up
FBgn0053474	CG33474	-1.83629	0.000681059	NA	NA	NA	Isolated up
FBgn0053493	CG33493	-1.71768	1.51582e-10	NA	NA	NA	Isolated up
FBgn0053494	CG33494	-1.92767	1.40424e-06	NA	NA	NA	Isolated up
FBgn0053510	CG33510	-3.16203	0.00629448	NA	NA	NA	Isolated up
FBgn0053777	CG33777	-1.55887	5.2216e-06	NA	NA	NA	Isolated up
FBgn0053784	CG33784	-1.58169	3.84836e-06	NA	NA	NA	Isolated up
FBgn0053963	lncRNA:CR33963	-1.38694	0.00619011	NA	NA	NA	Isolated up
FBgn0053966	CG33966	-1.78376	0.0454411	NA	NA	NA	Isolated up
FBgn0053970	osy	-1.40274	6.12998e-09	NA	NA	NA	Isolated up
FBgn0054054	CG34054	-1.66713	3.8283e-06	NA	NA	NA	Isolated up
FBgn0058006	CG40006	-1.85883	1.04143e-05	NA	NA	NA	Isolated up
FBgn0058298	CG40298	-1.54772	1.04395e-05	NA	NA	NA	Isolated up
FBgn0061356	Hao	-3.13934	1.56462e-20	NA	NA	YES	Isolated up
FBgn0062412	Ctr1B	-1.38707	0.00056598	NA	NA	NA	Isolated up
FBgn0062961	lncRNA:CR33942	-2.11113	0.0014717	NA	NA	NA	Isolated up
FBgn0063491	GstE9	-1.79352	2.84725e-08	YES	NA	NA	Isolated up
FBgn0063492	GstE8	-1.14696	0.0064685	NA	NA	YES	Isolated up
FBgn0063493	GstE7	-1.52983	0.0403518	YES	NA	YES	Isolated up
FBgn0063495	GstE5	-1.02223	0.016463	NA	NA	NA	Isolated up
FBgn0063496	GstE4	-1.00442	0.0251119	NA	NA	NA	Isolated up
FBgn0063497	GstE3	-1.37626	0.000231866	NA	NA	NA	Isolated up
FBgn0063923	Kaz1-ORFB	-1.34691	1.23721e-07	NA	NA	NA	Isolated up
FBgn0065047	snoRNA:U3:54Ab	-1.53486	0.0448482	NA	NA	NA	Isolated up
FBgn0069973	CG40485	-1.32276	7.93021e-14	NA	NA	NA	Isolated up
FBgn0082923	snoRNA:Or-aca3	-2.80488	0.0107973	NA	NA	NA	Isolated up
FBgn0083956	ldd	-1.24173	0.000122942	NA	NA	NA	Isolated up
FBgn0083970	CG34134	-1.31554	0.000156492	NA	NA	NA	Isolated up
FBgn0083974	CG34138	-2.84123	1.52903e-09	NA	NA	NA	Isolated up
FBgn0083978	CG17672	-1.34048	0.0160466	NA	NA	NA	Isolated up
FBgn0085195	CG34166	-2.56765	2.37517e-06	NA	NA	NA	Isolated up
FBgn0085209	CG34180	-1.07752	0.0282065	NA	NA	NA	Isolated up
FBgn0085237	CG34208	-1.53869	0.00744146	NA	NA	NA	Isolated up
FBgn0085320	CG34291	-2.15443	0.00424051	NA	NA	NA	Isolated up
FBgn0085350	inaF-C	-1.49766	0.000225789	NA	NA	NA	Isolated up
FBgn0085351	inaF-A	-3.06371	0.00555069	NA	NA	NA	Isolated up
FBgn0085360	CG34331	-2.05542	1.31101e-08	NA	NA	NA	Isolated up
FBgn0085453	Mthfs	-1.56789	4.79601e-10	NA	NA	NA	Isolated up
FBgn0085466	CG34437	-1.9786	0.023089	NA	NA	NA	Isolated up
FBgn0085488	CG34459	-1.01606	0.0287744	NA	NA	NA	Isolated up
FBgn0085489	CG34460	-1.25652	0.0454381	NA	NA	NA	Isolated up
FBgn0086044	snoRNA:Me28S-U1688	-1.19984	0.0165543	NA	NA	NA	Isolated up
FBgn0086266	Vm26Ac	-2.12303	0.0216671	NA	NA	NA	Isolated up
FBgn0086367	t	-1.31596	5.98923e-07	NA	NA	NA	Isolated up
FBgn0086450	su(r)	-1.39089	7.37993e-13	YES	NA	YES	Isolated up
FBgn0086687	Desat1	-1.86595	5.66345e-14	NA	NA	NA	Isolated up
FBgn0086691	UK114	-2.25443	8.32218e-12	NA	NA	NA	Isolated up
FBgn0087002	apolpp	-2.06819	3.57089e-09	NA	NA	NA	Isolated up
FBgn0259101	CG42249	-1.80185	5.94494e-06	NA	NA	NA	Isolated up
FBgn0259164	CG42269	-1.35057	0.00173157	NA	NA	NA	Isolated up
FBgn0259167	CG42272	-1.29695	0.000452907	NA	NA	NA	Isolated up
FBgn0259229	CG42329	-1.92114	0.00661573	NA	NA	NA	Isolated up
FBgn0259233	CG42331	-1.29655	0.000196759	NA	NA	NA	Isolated up
FBgn0259715	CG42369	-1.36052	0.00651669	NA	NA	NA	Isolated up
FBgn0259918	inaF-B	-2.56975	1.34746e-07	NA	NA	NA	Isolated up
FBgn0259985	Mppe	-1.2823	1.19308e-14	NA	NA	NA	Isolated up
FBgn0259992	CG42489	-1.47225	7.91338e-07	NA	NA	NA	Isolated up
FBgn0260006	drd	-1.10788	0.000157491	NA	NA	NA	Isolated up
FBgn0260459	CG14106	-1.96585	0.0426685	NA	NA	NA	Isolated up
FBgn0260474	CG30002	-1.73882	5.6885e-06	NA	NA	NA	Isolated up
FBgn0260746	Ect3	-1.42836	9.32202e-06	NA	NA	NA	Isolated up
FBgn0261393	α-Est5	-1.82817	4.79601e-10	NA	NA	YES	Isolated up
FBgn0261514	NimA	-1.49739	0.0165126	NA	NA	NA	Isolated up
FBgn0261575	tobi	-4.46322	1.5813e-20	NA	NA	YES	Isolated up
FBgn0261714	Cpn	-1.24053	1.21744e-08	NA	NA	NA	Isolated up
FBgn0261976	Psf2	-1.47574	1.60656e-06	NA	NA	NA	Isolated up
FBgn0262029	dachs	-1.10315	0.0361432	NA	NA	NA	Isolated up
FBgn0262035	CG42846	-1.92327	3.2399e-08	NA	NA	NA	Isolated up
FBgn0262140	CG42866	-3.24975	0.00537263	NA	NA	NA	Isolated up
FBgn0262142	lncRNA:CR42868	-2.18107	4.93972e-05	NA	NA	NA	Isolated up
FBgn0262353	CG43051	-2.23599	6.20416e-05	NA	NA	NA	Isolated up
FBgn0262366	CG43064	-1.70403	0.0030904	NA	NA	NA	Isolated up
FBgn0262481	CG43071	-1.67267	0.00096802	NA	NA	NA	Isolated up
FBgn0262537	CG43091	-1.07678	0.000252269	NA	NA	NA	Isolated up
FBgn0262539	CG43093	-1.72938	8.49866e-08	NA	NA	NA	Isolated up
FBgn0262540	CG43094	-2.17004	0.000581561	NA	NA	NA	Isolated up
FBgn0262563	CG43103	-1.26656	1.25599e-06	NA	NA	NA	Isolated up
FBgn0262569	CG43109	-2.71086	1.17178e-06	NA	NA	NA	Isolated up
FBgn0262570	CG43110	-1.30147	0.00835113	NA	NA	NA	Isolated up
FBgn0262574	CG43114	-2.07352	0.000124391	NA	NA	NA	Isolated up
FBgn0262686	CG43156	-1.54662	0.00813746	NA	NA	NA	Isolated up
FBgn0262808	CG43179	-3.92026	1.44314e-05	NA	YES	NA	Isolated up
FBgn0262952	mt:ND4	-1.16775	0.0227289	NA	NA	NA	Isolated up
FBgn0262983	CG43291	-1.54334	0.0225518	NA	NA	NA	Isolated up
FBgn0263006	SERCA	-1.38044	2.02653e-13	NA	NA	NA	Isolated up
FBgn0263083	CG43351	-2.0064	0.00125064	NA	NA	NA	Isolated up
FBgn0263199	Galk	-1.92421	1.16915e-09	NA	NA	NA	Isolated up
FBgn0263200	Galt	-1.42594	1.16915e-09	NA	NA	NA	Isolated up
FBgn0263330	lncRNA:CR43411	-2.14156	3.3753e-10	NA	NA	NA	Isolated up
FBgn0263336	lncRNA:CR43417	-1.73309	1.75143e-13	NA	NA	NA	Isolated up
FBgn0263390	Nha2	-1.45447	9.87089e-22	NA	NA	NA	Isolated up
FBgn0263406	lncRNA:CR43452	-1.91898	0.00329282	NA	NA	NA	Isolated up
FBgn0263617	lncRNA:CR43626	-2.89665	0.00411909	NA	NA	NA	Isolated up
FBgn0264267	asRNA:CR43767	-2.64804	0.000151311	NA	NA	NA	Isolated up
FBgn0264343	CG43799	-2.35348	0.00490764	NA	NA	NA	Isolated up
FBgn0264345	lncRNA:CR43801	-1.06418	0.037173	NA	NA	NA	Isolated up
FBgn0264679	asRNA:CR43964	-1.4133	3.19277e-05	NA	NA	NA	Isolated up
FBgn0264750	CG44008	-1.25807	5.00631e-05	NA	NA	NA	Isolated up
FBgn0264776	CG44014	-1.82475	2.44991e-06	NA	NA	NA	Isolated up
FBgn0264834	lncRNA:CR44042	-1.23456	0.00438214	NA	NA	NA	Isolated up
FBgn0264871	asRNA:CR44062	-1.14358	0.0228054	NA	NA	NA	Isolated up
FBgn0264874	asRNA:CR44065	-1.96358	6.18583e-09	NA	NA	NA	Isolated up
FBgn0264952	lncRNA:CR44121	-1.48437	0.00748863	NA	NA	NA	Isolated up
FBgn0264961	asRNA:CR44130	-2.20107	0.0352471	NA	NA	NA	Isolated up
FBgn0265274	Inx3	-1.06004	1.23322e-10	NA	NA	NA	Isolated up
FBgn0265313	CG44286	-1.18569	0.00130253	NA	NA	NA	Isolated up
FBgn0265318	asRNA:CR44291	-2.23848	0.00179215	NA	NA	NA	Isolated up
FBgn0265346	lncRNA:CR44300	-1.53182	0.0141174	NA	NA	NA	Isolated up
FBgn0265498	asRNA:CR44367	-1.95059	0.0268615	NA	NA	NA	Isolated up
FBgn0265530	lncRNA:CR44380	-1.0617	0.0493314	NA	NA	NA	Isolated up
FBgn0265705	asRNA:CR44512	-1.30988	0.00499834	NA	NA	NA	Isolated up
FBgn0265717	lncRNA:CR44524	-2.25552	0.0187844	NA	NA	NA	Isolated up
FBgn0265737	lncRNA:CR44544	-1.42218	0.0041347	NA	NA	NA	Isolated up
FBgn0265856	lncRNA:CR44645	-1.25828	0.0124324	NA	NA	NA	Isolated up
FBgn0265938	lncRNA:CR44725	-1.57368	0.00141825	NA	NA	NA	Isolated up
FBgn0266162	lncRNA:CR44868	-2.15737	0.00529229	NA	NA	YES	Isolated up
FBgn0266168	lncRNA:CR44874	-2.67034	0.00193597	NA	NA	NA	Isolated up
FBgn0266315	lncRNA:CR44980	-1.90837	0.00661205	NA	NA	NA	Isolated up
FBgn0266406	asRNA:CR45046	-2.98608	1.68229e-05	NA	NA	NA	Isolated up
FBgn0266637	asRNA:CR45144	-4.56875	6.74342e-10	NA	NA	NA	Isolated up
FBgn0266650	lncRNA:CR45157	-2.08167	0.0466822	NA	NA	NA	Isolated up
FBgn0266709	Zmynd10	-1.23534	0.0238702	NA	NA	NA	Isolated up
FBgn0266829	lncRNA:CR45291	-2.20536	0.0158374	NA	NA	NA	Isolated up
FBgn0266869	asRNA:CR45330	-2.61044	0.000992111	NA	NA	NA	Isolated up
FBgn0267041	asRNA:CR45485	-1.23331	0.00589647	NA	NA	NA	Isolated up
FBgn0267161	asRNA:CR45601	-3.73903	1.22241e-05	NA	NA	NA	Isolated up
FBgn0267236	CG45676	-1.15585	0.000925811	NA	NA	NA	Isolated up
FBgn0267240	lncRNA:CR45680	-1.53808	0.0437212	NA	NA	NA	Isolated up
FBgn0267298	lncRNA:CR45734	-1.22502	0.00481653	NA	NA	NA	Isolated up
FBgn0267339	p38c	-2.00477	0.000459357	NA	NA	NA	Isolated up
FBgn0267347	squ	-1.82117	3.64925e-06	NA	NA	NA	Isolated up
FBgn0267429	lovit	-1.02862	2.40877e-06	NA	NA	NA	Isolated up
FBgn0267435	chp	-1.30742	1.14811e-09	NA	NA	NA	Isolated up
FBgn0267762	asRNA:CR46093	-1.49866	0.0263183	NA	NA	NA	Isolated up
FBgn0267914	asRNA:CR46195	-1.04702	0.024042	NA	NA	NA	Isolated up
FBgn0268063	ltl	-1.37823	4.85955e-09	NA	NA	NA	Isolated up
FBgn0283427	FASN1	-1.71795	1.02145e-13	NA	NA	NA	Isolated up
FBgn0283461	Drs	-2.21279	0.00139494	NA	YES	NA	Isolated up
FBgn0283531	Duox	-1.02759	0.00217572	NA	NA	NA	Isolated up
FBgn0284081	CG46303	-2.66488	0.0158716	NA	NA	NA	Isolated up
FBgn0284084	wg	-1.00277	0.00503341	NA	NA	NA	Isolated up
FBgn0284245	eEF1α1	-1.39689	5.23635e-08	NA	NA	NA	Isolated up
FBgn0284247	ds	-1.08456	0.000376577	NA	NA	NA	Isolated up
FBgn0286507	vrs	-1.40362	0.010615	NA	NA	NA	Isolated up
FBgn0286508	Had1	-2.24235	5.90777e-20	NA	NA	YES	Isolated up
FBgn0286723	hll	-3.75022	1.5076e-06	NA	NA	NA	Isolated up
FBgn0286783	Etf-QO	-1.04158	2.41884e-08	NA	NA	NA	Isolated up
FBgn0286919	CR46419	-2.39979	1.80205e-08	NA	NA	NA	Isolated up
FBgn0287423	Nplp2	-2.57657	5.55383e-11	NA	NA	NA	Isolated up
FBgn0287592	CG46462	-1.00224	0.0008746	NA	NA	NA	Isolated up
FBgn0288229	CG3164	-1.37318	1.33859e-08	NA	NA	NA	Isolated up
FBgn0288810	CG46525	-1.4576	0.000153083	NA	NA	NA	Isolated up

## Sheet: ShortSD vs LongSD
GeneID (r6.57)	This Data	log2FoldChange	adj.p value	Wang et al., 2008	Agrawal et al., 2020	Li et al., 2022	Note
FBgn0000535	eag	1.07394	0.000302304	NA	NA	NA	ShortSD up
FBgn0002563	Lsp1β	4.62189	4.68661e-05	NA	NA	NA	ShortSD up
FBgn0003114	plu	6.03827	1.88026e-09	NA	NA	NA	ShortSD up
FBgn0003863	αTry	4.01945	0.00922738	NA	NA	NA	ShortSD up
FBgn0004360	Wnt2	2.19557	0.00748923	NA	NA	NA	ShortSD up
FBgn0004374	neb	1.1092	0.0435713	NA	NA	NA	ShortSD up
FBgn0004400	rhi	4.3279	9.54988e-06	NA	NA	NA	ShortSD up
FBgn0004554	Edg91	1.79793	0.0167943	NA	NA	NA	ShortSD up
FBgn0005670	Cyp4d1	2.94026	0.0216981	NA	NA	NA	ShortSD up
FBgn0010382	CycE	1.99666	0.000764128	NA	NA	NA	ShortSD up
FBgn0014395	tilB	1.6812	1.27033e-05	NA	NA	NA	ShortSD up
FBgn0014465	Cp7Fb	1.65908	0.000158691	NA	NA	NA	ShortSD up
FBgn0015010	Ag5r	1.54142	0.00474728	NA	NA	NA	ShortSD up
FBgn0015271	Orc5	1.14857	0.000116216	NA	NA	NA	ShortSD up
FBgn0015381	dsf	2.38579	0.00039345	NA	NA	NA	ShortSD up
FBgn0021742	C901	3.69158	4.3713e-05	NA	NA	NA	ShortSD up
FBgn0025676	CkIIα-i3	1.71545	5.50917e-05	NA	NA	NA	ShortSD up
FBgn0027376	rha	1.07193	0.00746269	NA	NA	NA	ShortSD up
FBgn0027500	spd-2	1.06257	0.0350396	NA	NA	NA	ShortSD up
FBgn0028789	Doc1	2.84148	0.00364538	NA	NA	NA	ShortSD up
FBgn0028899	CG31817	1.17772	0.0184584	NA	NA	NA	ShortSD up
FBgn0029606	CG14052	4.43246	0.000214275	NA	NA	NA	ShortSD up
FBgn0029690	CG6414	1.5247	0.0460871	NA	NA	NA	ShortSD up
FBgn0029719	CG15473	1.31037	0.0236778	NA	NA	NA	ShortSD up
FBgn0029722	Pdha2	1.15123	0.0124484	NA	NA	NA	ShortSD up
FBgn0030296	CG15196	1.00124	0.0151864	NA	NA	NA	ShortSD up
FBgn0030375	CG11356	3.65497	0.000406805	NA	NA	NA	ShortSD up
FBgn0030377	CG1924	7.17884	4.53472e-05	NA	NA	NA	ShortSD up
FBgn0030641	CG6299	5.6259	2.53175e-05	NA	NA	NA	ShortSD up
FBgn0030933	CG6470	1.11832	0.00209211	NA	NA	NA	ShortSD up
FBgn0031034	CG14205	5.59568	1.88255e-06	NA	NA	NA	ShortSD up
FBgn0031169	CG1494	1.80182	0.0232581	NA	NA	NA	ShortSD up
FBgn0031292	CG15824	1.09549	0.0315672	NA	NA	NA	ShortSD up
FBgn0031365	CG17650	1.61733	0.0202263	NA	NA	NA	ShortSD up
FBgn0031409	CG4271	2.82222	0.0103797	NA	NA	NA	ShortSD up
FBgn0031423	CG3557	2.21708	0.0237835	NA	NA	NA	ShortSD up
FBgn0031592	Art2	1.33005	0.000577154	NA	NA	NA	ShortSD up
FBgn0031644	CG15625	4.52599	4.84637e-07	NA	NA	NA	ShortSD up
FBgn0031831	COX5BL	1.13174	0.0411559	NA	NA	NA	ShortSD up
FBgn0031886	Nuf2	1.31273	0.00660227	NA	NA	NA	ShortSD up
FBgn0032140	CG13117	1.02946	0.0167432	NA	NA	NA	ShortSD up
FBgn0032235	CG5096	2.22401	0.00183812	NA	NA	NA	ShortSD up
FBgn0032431	CG5435	2.18873	0.00349435	NA	NA	NA	ShortSD up
FBgn0032602	ppk17	2.53034	0.0320432	NA	NA	NA	ShortSD up
FBgn0032754	CG10700	4.31703	1.37692e-05	NA	NA	NA	ShortSD up
FBgn0033042	Tsp42A	4.45589	0.00527865	NA	NA	NA	ShortSD up
FBgn0033140	CG12836	2.60913	0.000406805	NA	NA	NA	ShortSD up
FBgn0033234	MFS12	1.47529	0.0461261	NA	NA	NA	ShortSD up
FBgn0033283	CG11635	2.04834	0.000783781	NA	NA	NA	ShortSD up
FBgn0033501	CG12911	3.69287	1.88026e-09	NA	NA	NA	ShortSD up
FBgn0033520	Prx6b	1.46666	0.00562735	NA	NA	NA	ShortSD up
FBgn0033873	CG6337	2.60592	0.0212219	NA	NA	NA	ShortSD up
FBgn0033885	DJ-1α	1.04869	0.015796	NA	NA	NA	ShortSD up
FBgn0033997	Ir51a	2.80059	0.0276737	NA	NA	NA	ShortSD up
FBgn0034082	CG10734	4.81036	3.91551e-05	NA	NA	NA	ShortSD up
FBgn0034139	CG4927	2.29893	0.00611122	NA	NA	NA	ShortSD up
FBgn0034221	CG10764	6.35303	1.88026e-09	NA	NA	NA	ShortSD up
FBgn0034296	CG10912	4.26088	0.00705233	NA	NA	NA	ShortSD up
FBgn0034363	CG5327	1.61033	0.0402929	NA	NA	NA	ShortSD up
FBgn0034460	CG18367	1.68421	0.00899262	NA	NA	NA	ShortSD up
FBgn0034687	CG11475	1.51095	4.21534e-09	NA	NA	NA	ShortSD up
FBgn0034739	CG3927	1.70397	0.0194815	NA	NA	NA	ShortSD up
FBgn0034996	CG13575	1.65753	0.000372719	NA	NA	NA	ShortSD up
FBgn0035094	CG9380	3.29593	1.89258e-05	NA	NA	NA	ShortSD up
FBgn0035158	CG13895	1.19795	3.56258e-06	NA	NA	NA	ShortSD up
FBgn0035159	CG13896	1.66402	0.000534864	NA	NA	NA	ShortSD up
FBgn0035167	Gr61a	1.54773	0.00750122	NA	NA	NA	ShortSD up
FBgn0035258	CG13931	1.22853	0.0200373	NA	NA	NA	ShortSD up
FBgn0035608	blanks	2.17017	0.0135243	NA	NA	NA	ShortSD up
FBgn0035626	lin-28	1.38198	0.0155527	NA	NA	NA	ShortSD up
FBgn0035640	mad2	1.21645	0.0149735	NA	NA	NA	ShortSD up
FBgn0035665	Jon65Aiii	3.55542	0.00820606	NA	NA	NA	ShortSD up
FBgn0035823	eIF4E5	3.65264	0.0155527	NA	NA	NA	ShortSD up
FBgn0035831	Pop4	1.48616	1.18699e-09	NA	NA	NA	ShortSD up
FBgn0035838	ldbr	1.03492	0.00240299	NA	NA	NA	ShortSD up
FBgn0036214	CG7264	1.46506	0.0312406	NA	NA	NA	ShortSD up
FBgn0036311	CG17666	3.93201	0.000420778	NA	NA	NA	ShortSD up
FBgn0036363	CG10140	6.39045	0.000143032	NA	NA	NA	ShortSD up
FBgn0036414	nan	4.30917	0.000139268	NA	NA	NA	ShortSD up
FBgn0036655	CG13031	7.53494	7.78515e-06	NA	NA	NA	ShortSD up
FBgn0037147	CG7140	3.21401	0.03082	NA	NA	NA	ShortSD up
FBgn0037291	CG14662	1.08483	0.00615183	NA	NA	NA	ShortSD up
FBgn0037304	CG1113	1.23846	0.0369083	NA	NA	NA	ShortSD up
FBgn0037410	Osi2	2.46459	0.0140494	NA	NA	NA	ShortSD up
FBgn0037590	Or85b	4.24338	3.26332e-05	NA	NA	NA	ShortSD up
FBgn0037753	CG12947	2.78232	0.000171054	NA	NA	NA	ShortSD up
FBgn0037889	scpr-A	2.5616	0.0489367	NA	NA	NA	ShortSD up
FBgn0038311	CG14864	2.1744	0.000406805	NA	NA	NA	ShortSD up
FBgn0038394	Jhbp4	7.36755	0.000131511	NA	NA	NA	ShortSD up
FBgn0038450	CG17560	4.29962	0.00157182	NA	NA	NA	ShortSD up
FBgn0038462	EMC2A	1.10818	0.000534864	NA	NA	NA	ShortSD up
FBgn0038526	CG14327	3.40334	5.30144e-08	NA	NA	NA	ShortSD up
FBgn0038565	CG7794	3.78202	2.98422e-06	NA	NA	NA	ShortSD up
FBgn0038629	CG14304	3.18359	0.00049257	NA	NA	NA	ShortSD up
FBgn0038641	ChT	1.82027	4.20261e-05	NA	NA	NA	ShortSD up
FBgn0038789	Ir92a	3.60527	0.0315115	NA	NA	NA	ShortSD up
FBgn0038909	CG6569	1.69092	0.00815018	NA	NA	NA	ShortSD up
FBgn0039015	Takl2	2.10254	0.00186627	NA	NA	NA	ShortSD up
FBgn0039028	CG13840	2.01411	0.000588077	NA	NA	NA	ShortSD up
FBgn0039201	DZIP1	1.12362	0.0126786	NA	NA	NA	ShortSD up
FBgn0039342	CG5107	4.55977	1.09032e-07	NA	NA	NA	ShortSD up
FBgn0039343	CG5111	3.91084	0.000297946	NA	NA	NA	ShortSD up
FBgn0039479	CG14257	1.00301	0.0115812	NA	NA	NA	ShortSD up
FBgn0039508	CG3368	1.00286	0.00474728	NA	NA	NA	ShortSD up
FBgn0039768	CG15533	3.52727	0.0280434	NA	NA	NA	ShortSD up
FBgn0039811	CG15550	1.55414	0.00458697	NA	NA	NA	ShortSD up
FBgn0040091	Ugt317A1	1.11562	0.049794	NA	NA	NA	ShortSD up
FBgn0040352	CG14416	2.00132	0.00510974	NA	NA	NA	ShortSD up
FBgn0042178	Apl	1.591	1.81606e-05	NA	NA	NA	ShortSD up
FBgn0043577	PGRP-SB2	5.71769	0.000153628	NA	NA	NA	ShortSD up
FBgn0050099	CG30099	1.54561	0.000584851	NA	NA	NA	ShortSD up
FBgn0050177	CG30177	2.75877	0.0232878	NA	NA	NA	ShortSD up
FBgn0050324	CG30324	1.60507	0.0202263	NA	NA	NA	ShortSD up
FBgn0051029	CG31029	1.27885	0.045154	NA	NA	NA	ShortSD up
FBgn0051174	CG31174	3.48109	8.679e-11	NA	NA	NA	ShortSD up
FBgn0051386	lncRNA:CR31386	1.85505	0.0397958	NA	NA	NA	ShortSD up
FBgn0051516	CG31516	3.1664	0.0242449	NA	NA	NA	ShortSD up
FBgn0051658	Nnf1b	1.69291	0.0116957	NA	NA	NA	ShortSD up
FBgn0051683	CG31683	2.99977	0.00364538	NA	NA	NA	ShortSD up
FBgn0051687	CG31687	1.29555	0.00107667	NA	NA	NA	ShortSD up
FBgn0051875	CG31875	1.43899	0.0057807	NA	NA	NA	ShortSD up
FBgn0051897	CG31897	1.88847	0.000285741	NA	NA	NA	ShortSD up
FBgn0052207	hpRNA:CR32207	1.81989	1.02884e-06	NA	NA	NA	ShortSD up
FBgn0052364	tut	1.17525	0.0118166	NA	NA	NA	ShortSD up
FBgn0052745	CR32745	2.52866	2.53175e-05	NA	NA	NA	ShortSD up
FBgn0052762	CG32762	3.7979	0.00085223	NA	NA	NA	ShortSD up
FBgn0052817	CG32817	1.56736	0.000277077	NA	NA	NA	ShortSD up
FBgn0053200	VepD	1.22292	7.92023e-05	NA	NA	NA	ShortSD up
FBgn0053310	CG33310	1.35613	0.00561211	NA	NA	NA	ShortSD up
FBgn0053463	CG33463	1.9654	0.0461261	NA	NA	NA	ShortSD up
FBgn0053514	CG33514	1.90201	0.00108979	NA	NA	NA	ShortSD up
FBgn0054041	CG34041	2.43479	0.0300355	NA	NA	NA	ShortSD up
FBgn0083141	Spn28B	6.43313	4.12168e-05	NA	NA	NA	ShortSD up
FBgn0085246	CG34217	2.65583	0.00830183	NA	NA	NA	ShortSD up
FBgn0085771	28SrRNA-Ψ:CR40741	2.6787	0.000818492	NA	NA	NA	ShortSD up
FBgn0250815	Jon65Aiv	4.01655	0.0020235	NA	NA	NA	ShortSD up
FBgn0250835	CG15394	1.04656	0.00485308	NA	NA	NA	ShortSD up
FBgn0259713	CG42367	1.74256	0.00240299	NA	NA	NA	ShortSD up
FBgn0261624	I-3	1.52158	0.0101816	NA	NA	NA	ShortSD up
FBgn0261832	CG42764	3.03038	1.62307e-05	NA	NA	NA	ShortSD up
FBgn0262146	MtnE	1.01648	0.00079257	NA	NA	NA	ShortSD up
FBgn0262598	mtsh	1.6503	4.77989e-07	NA	NA	NA	ShortSD up
FBgn0262631	lncRNA:CR43148	1.56543	9.7698e-09	NA	NA	NA	ShortSD up
FBgn0262682	asRNA:CR43152	1.19082	0.0076017	NA	NA	NA	ShortSD up
FBgn0262887	lncRNA:CR43242	1.37037	1.64917e-12	NA	NA	NA	ShortSD up
FBgn0263586	lncRNA:CR43611	1.07322	0.00819154	NA	NA	NA	ShortSD up
FBgn0263974	qin	1.03002	0.0491728	NA	NA	NA	ShortSD up
FBgn0264077	Cnx14D	1.38008	0.000272744	NA	NA	NA	ShortSD up
FBgn0264084	lncRNA:CR43753	1.88251	0.0256282	NA	NA	NA	ShortSD up
FBgn0264390	lncRNA:CR43838	1.27861	0.0110827	NA	NA	NA	ShortSD up
FBgn0264395	CG43843	1.06292	0.0494008	NA	NA	NA	ShortSD up
FBgn0264475	lncRNA:CR43883	2.9683	1.52135e-07	NA	NA	NA	ShortSD up
FBgn0264567	lncRNA:CR43939	2.39287	0.00113915	NA	NA	NA	ShortSD up
FBgn0264676	lncRNA:CR43961	2.07956	0.00625917	NA	NA	NA	ShortSD up
FBgn0265041	CG44158	1.6071	0.0165445	NA	NA	NA	ShortSD up
FBgn0265381	lncRNA:CR44322	1.23313	0.0457248	NA	NA	NA	ShortSD up
FBgn0265584	lncRNA:CR44411	1.78638	0.0169596	NA	NA	NA	ShortSD up
FBgn0265689	lncRNA:CR44496	3.7378	0.00289335	NA	NA	NA	ShortSD up
FBgn0265691	lncRNA:CR44498	1.4088	0.00497429	NA	NA	NA	ShortSD up
FBgn0265811	asRNA:CR44600	1.27889	0.03324	NA	NA	NA	ShortSD up
FBgn0266149	lncRNA:CR44855	1.18878	0.0351597	NA	NA	NA	ShortSD up
FBgn0266199	asRNA:CR44894	2.19951	0.0140541	NA	NA	NA	ShortSD up
FBgn0266706	lncRNA:CR45196	3.25296	8.51369e-05	NA	NA	NA	ShortSD up
FBgn0266752	lncRNA:CR45225	3.39776	0.00121431	NA	NA	NA	ShortSD up
FBgn0266772	lncRNA:CR45237	2.73775	0.0230088	NA	NA	NA	ShortSD up
FBgn0266782	lncRNA:CR45247	2.11814	0.00364593	NA	NA	NA	ShortSD up
FBgn0266876	lncRNA:CR45337	2.38433	0.0167231	NA	NA	NA	ShortSD up
FBgn0266952	lncRNA:CR45403	2.40342	0.00527865	NA	NA	NA	ShortSD up
FBgn0266963	lncRNA:CR45414	1.25487	0.00759337	NA	NA	NA	ShortSD up
FBgn0267027	lncRNA:CR45471	2.94053	0.0153866	NA	NA	NA	ShortSD up
FBgn0267099	lncRNA:CR45539	4.7432	9.52616e-07	NA	NA	NA	ShortSD up
FBgn0267211	lncRNA:CR45651	2.36714	0.00130204	NA	NA	NA	ShortSD up
FBgn0267278	asRNA:CR45714	3.701	2.98422e-06	NA	NA	NA	ShortSD up
FBgn0267304	lncRNA:CR45740	1.73277	0.0156648	NA	NA	NA	ShortSD up
FBgn0267431	Myo81F	1.03115	0.00209211	NA	NA	NA	ShortSD up
FBgn0267519	28SrRNA-Ψ:CR45859	1.67774	0.0143193	NA	NA	NA	ShortSD up
FBgn0267520	28SrRNA-Ψ:CR45860	1.46089	0.0444529	NA	NA	NA	ShortSD up
FBgn0267535	asRNA:CR45875	1.14194	0.0144422	NA	NA	NA	ShortSD up
FBgn0267542	asRNA:CR45882	1.33666	0.00798982	NA	NA	NA	ShortSD up
FBgn0267554	asRNA:CR45894	1.04607	0.0412185	NA	NA	NA	ShortSD up
FBgn0267570	lncRNA:CR45910	2.07323	0.000555837	NA	NA	NA	ShortSD up
FBgn0267585	lncRNA:dntRL	2.84821	4.22741e-05	NA	NA	NA	ShortSD up
FBgn0267589	asRNA:CR45927	6.27129	0.000171691	NA	NA	NA	ShortSD up
FBgn0267605	asRNA:CR45943	1.08499	0.0092454	NA	NA	NA	ShortSD up
FBgn0267685	lncRNA:CR46021	3.42857	0.00121431	NA	NA	NA	ShortSD up
FBgn0267697	asRNA:CR46033	1.77883	0.0232878	NA	NA	NA	ShortSD up
FBgn0267812	asRNA:CR46137	1.55324	0.0308694	NA	NA	NA	ShortSD up
FBgn0267819	asRNA:CR46144	1.31146	0.00364593	NA	NA	NA	ShortSD up
FBgn0267966	asRNA:CR46246	1.52317	0.0162454	NA	NA	NA	ShortSD up
FBgn0285912	mah	2.70136	0.000227371	NA	NA	NA	ShortSD up
FBgn0286852	naz	1.061	0.0247768	NA	NA	NA	ShortSD up
FBgn0000594	Est-P	-2.67147	0.000198767	NA	NA	NA	LongSD up
FBgn0001147	gsb-n	-1.79553	0.00874619	NA	NA	NA	LongSD up
FBgn0001258	Ldh	-2.4069	8.49021e-06	NA	NA	NA	LongSD up
FBgn0002577	m	-1.3971	0.0275079	NA	NA	NA	LongSD up
FBgn0002732	E(spl)mα-BFM	-1.24004	0.0401413	NA	NA	NA	LongSD up
FBgn0003060	CG9757	-2.04319	0.0411126	NA	NA	NA	LongSD up
FBgn0003655	swa	-2.40732	0.00807581	NA	NA	NA	LongSD up
FBgn0010038	GstD2	-2.53977	6.07031e-06	NA	NA	NA	LongSD up
FBgn0010040	GstD4	-2.84	4.15884e-05	NA	NA	NA	LongSD up
FBgn0010041	GstD5	-2.73347	3.2801e-06	NA	NA	NA	LongSD up
FBgn0010504	kermit	-1.20403	0.0103981	NA	NA	NA	LongSD up
FBgn0013277	Hsp70Ba	-4.3461	8.66867e-06	NA	NA	NA	LongSD up
FBgn0013772	Cyp6a8	-2.48881	0.00865219	NA	NA	YES	LongSD up
FBgn0013773	Cyp6a22	-1.07255	0.0380869	NA	NA	NA	LongSD up
FBgn0014135	bnl	-1.49448	0.000897622	NA	NA	NA	LongSD up
FBgn0015035	Cyp4e3	-1.56351	0.0489367	NA	NA	NA	LongSD up
FBgn0015336	CG15865	-1.92745	0.0300355	NA	NA	NA	LongSD up
FBgn0015569	α-Est10	-1.18418	0.0295255	NA	NA	YES	LongSD up
FBgn0016919	nompB	-1.68263	0.00206883	NA	NA	NA	LongSD up
FBgn0023395	Chd3	-2.77624	0.000542094	NA	NA	NA	LongSD up
FBgn0025583	BomS2	-1.45167	0.00218968	NA	NA	NA	LongSD up
FBgn0026268	Antdh	-1.51728	0.0156648	NA	NA	NA	LongSD up
FBgn0026755	Ugt37B1	-3.0162	0.0199834	NA	NA	NA	LongSD up
FBgn0027584	CG4757	-3.46712	5.27124e-10	NA	YES	NA	LongSD up
FBgn0027586	Jhbp14	-1.18124	0.000908631	NA	NA	NA	LongSD up
FBgn0027836	Gtpbp1	-1.02223	0.0178047	NA	NA	NA	LongSD up
FBgn0029167	Hml	-1.54091	0.00230658	NA	NA	NA	LongSD up
FBgn0030191	CG15306	-5.19153	2.61145e-07	NA	NA	NA	LongSD up
FBgn0030348	CG10352	-1.19705	0.010129	NA	NA	NA	LongSD up
FBgn0030360	CG1806	-1.62401	0.00121431	NA	NA	NA	LongSD up
FBgn0030594	fiz	-2.15562	0.0357395	NA	NA	NA	LongSD up
FBgn0030952	CG12609	-3.36803	0.0105277	NA	NA	NA	LongSD up
FBgn0031176	whe	-3.73964	0.0103797	NA	NA	NA	LongSD up
FBgn0031261	nAChRβ3	-1.05582	0.000783781	NA	NA	NA	LongSD up
FBgn0031307	MFS3	-1.42629	0.0055109	NA	NA	NA	LongSD up
FBgn0031451	CG9961	-3.13996	7.23555e-07	NA	NA	NA	LongSD up
FBgn0031461	daw	-1.13614	0.0236322	NA	NA	NA	LongSD up
FBgn0031462	CG2964	-2.56864	0.0312406	NA	NA	NA	LongSD up
FBgn0031646	snsl	-1.38501	0.0122738	YES	NA	NA	LongSD up
FBgn0031693	Cyp4ac1	-1.41601	0.0149691	NA	NA	NA	LongSD up
FBgn0031731	CG14007	-2.35096	0.00209211	NA	NA	NA	LongSD up
FBgn0031732	CG11149	-8.59142	2.08105e-08	NA	NA	NA	LongSD up
FBgn0031803	ppk14	-2.87467	0.0264256	NA	NA	NA	LongSD up
FBgn0031937	CG13795	-1.369	0.0263449	YES	NA	NA	LongSD up
FBgn0032187	CG4839	-5.14828	0.000214275	NA	NA	NA	LongSD up
FBgn0032266	CG18302	-1.73149	0.0065455	NA	NA	NA	LongSD up
FBgn0032284	CG7294	-1.4344	0.000457852	NA	NA	NA	LongSD up
FBgn0032285	CG17108	-1.36641	0.0131031	NA	NA	NA	LongSD up
FBgn0032415	rho-6	-1.57154	0.00256949	NA	NA	NA	LongSD up
FBgn0032470	Ttc30	-2.05924	0.000783781	NA	NA	NA	LongSD up
FBgn0032493	Mabi	-2.32437	5.40184e-05	NA	NA	NA	LongSD up
FBgn0032505	CG16826	-4.11032	0.00426768	NA	NA	NA	LongSD up
FBgn0032867	CG15475	-1.21142	0.0411136	NA	NA	NA	LongSD up
FBgn0033112	Spn42Db	-5.87352	8.01723e-07	NA	NA	NA	LongSD up
FBgn0033115	Spn42De	-2.83707	0.00124802	NA	NA	NA	LongSD up
FBgn0033154	CG1850	-2.13052	0.000153628	NA	NA	NA	LongSD up
FBgn0033204	CG2065	-1.2003	0.0208127	NA	NA	NA	LongSD up
FBgn0033215	Dgat2	-1.58353	0.0384301	NA	NA	NA	LongSD up
FBgn0033302	Cyp6a14	-1.75706	0.00423371	NA	NA	NA	LongSD up
FBgn0033388	CG8046	-1.1148	0.0270567	NA	NA	NA	LongSD up
FBgn0033521	CG12896	-2.94826	0.00229068	YES	NA	YES	LongSD up
FBgn0033524	Cyp49a1	-1.00822	0.0278002	NA	NA	NA	LongSD up
FBgn0033573	Obp47a	-3.26014	8.5877e-05	NA	NA	NA	LongSD up
FBgn0033594	CG13226	-1.72524	0.0188617	NA	NA	NA	LongSD up
FBgn0033856	CG13334	-2.10149	0.00849127	NA	NA	NA	LongSD up
FBgn0033866	CG6280	-3.75192	0.000798729	NA	NA	NA	LongSD up
FBgn0033867	Cpr50Ca	-2.01626	0.00740096	NA	NA	NA	LongSD up
FBgn0034165	CG6435	-1.03878	0.00113915	NA	NA	NA	LongSD up
FBgn0034335	GstE1	-1.46901	5.27124e-10	NA	NA	NA	LongSD up
FBgn0034454	CG15120	-1.90635	0.0226859	NA	NA	NA	LongSD up
FBgn0034511	GNBP-like3	-1.86649	0.00120883	NA	YES	NA	LongSD up
FBgn0034761	CG4250	-1.25967	0.00124802	NA	NA	NA	LongSD up
FBgn0035431	CG14968	-1.93834	1.47226e-08	NA	NA	NA	LongSD up
FBgn0035434	Drsl5	-2.41501	3.11239e-07	NA	NA	NA	LongSD up
FBgn0035512	Cpr64Ac	-1.911	0.00905618	NA	NA	NA	LongSD up
FBgn0035620	Alp9	-4.93412	0.00111575	NA	NA	NA	LongSD up
FBgn0035623	mthl2	-1.32572	0.0275079	NA	NA	NA	LongSD up
FBgn0035771	Sec63	-1.06662	1.06082e-05	NA	NA	YES	LongSD up
FBgn0035798	frac	-4.75407	1.52135e-07	NA	NA	NA	LongSD up
FBgn0035813	CG8492	-1.50908	0.00161594	NA	NA	NA	LongSD up
FBgn0035868	CG7194	-1.28651	0.00521791	NA	NA	NA	LongSD up
FBgn0035873	CG13670	-1.48968	0.00113915	NA	NA	NA	LongSD up
FBgn0035918	Cdc6	-1.72627	0.0464461	NA	NA	NA	LongSD up
FBgn0036168	CG7512	-1.07988	0.0195143	NA	NA	NA	LongSD up
FBgn0036423	CG3919	-2.34358	1.65021e-05	NA	NA	NA	LongSD up
FBgn0036436	CG4914	-2.19708	6.51752e-06	NA	NA	NA	LongSD up
FBgn0036557	mRpS31	-1.13329	0.0111334	NA	NA	NA	LongSD up
FBgn0036677	CG13023	-1.10956	0.0141795	NA	NA	NA	LongSD up
FBgn0036698	CG7724	-1.08433	0.0219504	NA	NA	NA	LongSD up
FBgn0036711	CG13727	-2.04743	0.00139354	NA	NA	NA	LongSD up
FBgn0036727	SecCl	-1.35986	0.00891085	NA	NA	NA	LongSD up
FBgn0036945	Ssk	-2.37693	4.05381e-08	NA	NA	NA	LongSD up
FBgn0036956	CG13813	-2.80802	0.0202263	NA	NA	NA	LongSD up
FBgn0037126	CG14567	-1.05597	0.023975	NA	NA	NA	LongSD up
FBgn0037191	CG14448	-3.74791	0.0154059	NA	NA	NA	LongSD up
FBgn0037365	CG2104	-4.65724	0.00391369	NA	NA	NA	LongSD up
FBgn0037579	COX7AL	-4.59501	2.77532e-05	NA	NA	NA	LongSD up
FBgn0037665	St2	-6.29875	4.61627e-05	NA	NA	NA	LongSD up
FBgn0037667	CG16734	-1.23286	0.0204989	NA	NA	NA	LongSD up
FBgn0037826	CG14689	-3.19227	0.0312406	NA	NA	NA	LongSD up
FBgn0037936	CG6908	-1.18559	0.0122738	NA	NA	NA	LongSD up
FBgn0037975	CG3397	-3.05098	0.00761575	YES	NA	NA	LongSD up
FBgn0038002	CG12256	-3.0409	0.0002218	NA	NA	NA	LongSD up
FBgn0038140	PK2-R1	-1.55727	0.00113915	NA	NA	NA	LongSD up
FBgn0038339	CG6118	-2.9886	0.000272744	NA	NA	NA	LongSD up
FBgn0038431	CG10405	-1.86699	0.0320408	NA	NA	NA	LongSD up
FBgn0038492	Mur89F	-2.85292	0.0075355	NA	NA	NA	LongSD up
FBgn0038525	CG14329	-1.79369	0.020965	NA	NA	NA	LongSD up
FBgn0038647	CG14302	-1.81164	0.0171762	NA	NA	NA	LongSD up
FBgn0038682	CG5835	-1.23909	4.20261e-05	NA	NA	NA	LongSD up
FBgn0038820	CG4000	-1.85187	0.020737	NA	NA	NA	LongSD up
FBgn0038878	CG3301	-1.53134	2.41457e-05	NA	NA	NA	LongSD up
FBgn0039298	to	-1.59141	0.00458697	NA	NA	NA	LongSD up
FBgn0039315	CG13658	-1.02389	0.0167943	NA	NA	NA	LongSD up
FBgn0039325	CG10560	-2.10368	0.00423537	NA	NA	NA	LongSD up
FBgn0039801	Npc2h	-1.55039	0.0137871	NA	NA	NA	LongSD up
FBgn0040524	CG11052	-2.63499	7.91609e-11	NA	NA	NA	LongSD up
FBgn0040582	BomBc3	-1.09856	0.0233278	NA	NA	NA	LongSD up
FBgn0040609	CG3348	-1.76532	0.00976527	NA	NA	NA	LongSD up
FBgn0040653	Dso1	-1.33392	0.0165397	NA	NA	NA	LongSD up
FBgn0040736	BomS3	-1.13341	0.00410679	NA	NA	NA	LongSD up
FBgn0040837	CG8620	-1.2937	0.042622	NA	NA	NA	LongSD up
FBgn0040972	CG16978	-1.05654	0.0264094	NA	NA	NA	LongSD up
FBgn0041709	yellow-g	-1.27653	0.00581535	NA	NA	NA	LongSD up
FBgn0046875	Obp83g	-1.33874	0.0311592	NA	NA	NA	LongSD up
FBgn0050036	CG30036	-3.90371	0.00173041	NA	NA	NA	LongSD up
FBgn0050054	CG30054	-2.09472	2.75602e-05	NA	NA	NA	LongSD up
FBgn0050195	CG30195	-4.16713	4.3713e-05	NA	NA	NA	LongSD up
FBgn0050295	Ipk1	-1.31929	3.24616e-05	NA	NA	NA	LongSD up
FBgn0050339	CG30339	-4.1685	1.47226e-08	NA	NA	NA	LongSD up
FBgn0050340	CG30340	-3.25247	0.000158691	NA	NA	NA	LongSD up
FBgn0050371	CG30371	-3.11402	2.12302e-06	NA	NA	NA	LongSD up
FBgn0050411	CG30411	-1.10953	0.033343	NA	NA	NA	LongSD up
FBgn0050489	Cyp12d1-p	-2.10472	0.013708	NA	NA	NA	LongSD up
FBgn0051205	CG31205	-2.19293	0.00583722	NA	NA	NA	LongSD up
FBgn0051288	CG31288	-1.3492	6.76733e-06	NA	NA	NA	LongSD up
FBgn0051373	CG31373	-2.01883	0.0413087	NA	NA	NA	LongSD up
FBgn0051436	CG31436	-1.58213	6.07031e-06	NA	NA	NA	LongSD up
FBgn0051465	CG31465	-2.44073	0.0179436	NA	NA	NA	LongSD up
FBgn0051626	CG31626	-1.25521	0.0291686	NA	NA	NA	LongSD up
FBgn0051810	CG31810	-1.29685	0.0126786	NA	NA	NA	LongSD up
FBgn0052282	Drsl4	-2.20158	1.5983e-05	NA	NA	NA	LongSD up
FBgn0052373	CG32373	-3.24499	0.000131511	NA	NA	NA	LongSD up
FBgn0052475	mthl8	-4.31858	0.00352167	NA	NA	NA	LongSD up
FBgn0052783	Gem4c	-2.77023	5.37977e-09	NA	NA	NA	LongSD up
FBgn0053159	CG33159	-2.74719	0.000195497	NA	NA	NA	LongSD up
FBgn0053346	CG33346	-2.99324	0.00750122	NA	NA	NA	LongSD up
FBgn0053458	CG33458	-1.68079	0.0282981	NA	NA	NA	LongSD up
FBgn0053474	Pex11g	-1.92606	0.00164581	NA	NA	NA	LongSD up
FBgn0063492	GstE8	-1.14291	0.0352805	NA	NA	YES	LongSD up
FBgn0063497	GstE3	-1.19916	0.0198817	NA	NA	NA	LongSD up
FBgn0063499	GstE10	-2.20739	0.0130446	NA	NA	NA	LongSD up
FBgn0085209	CG34180	-1.30532	0.0233278	NA	NA	NA	LongSD up
FBgn0085244	CG34215	-2.60477	6.91591e-06	NA	NA	NA	LongSD up
FBgn0085250	CG34221	-1.70723	0.0439102	NA	NA	NA	LongSD up
FBgn0085256	CG34227	-1.85543	0.000577154	NA	NA	NA	LongSD up
FBgn0250842	CG17575	-3.93175	1.81606e-05	NA	NA	NA	LongSD up
FBgn0259140	Cubn2	-3.83631	1.23254e-05	NA	NA	NA	LongSD up
FBgn0259229	CG42329	-2.57303	3.39568e-05	NA	NA	NA	LongSD up
FBgn0259233	CG42331	-1.33677	0.000876507	NA	NA	NA	LongSD up
FBgn0259710	CG42364	-2.3999	0.00495546	NA	NA	NA	LongSD up
FBgn0260768	CG42566	-1.35234	0.00198898	NA	NA	NA	LongSD up
FBgn0261508	CG42656	-2.68351	0.0315736	NA	NA	NA	LongSD up
FBgn0261632	lncRNA:CR42715	-2.06794	0.00113915	NA	NA	NA	LongSD up
FBgn0261989	CG42807	-1.93318	6.76733e-06	NA	YES	NA	LongSD up
FBgn0262003	CG42821	-1.9276	1.96962e-05	NA	NA	NA	LongSD up
FBgn0262004	CG42822	-3.56048	5.27124e-10	NA	NA	NA	LongSD up
FBgn0263406	lncRNA:CR43452	-2.11598	0.00527865	NA	NA	NA	LongSD up
FBgn0263408	asRNA:CR43454	-1.09715	0.0472541	NA	NA	NA	LongSD up
FBgn0263446	asRNA:CR43469	-2.51756	0.0172583	NA	NA	NA	LongSD up
FBgn0263584	asRNA:CR43609	-1.88896	0.000418201	NA	NA	NA	LongSD up
FBgn0264748	CG44006	-1.05111	0.0369083	NA	NA	NA	LongSD up
FBgn0264817	pre-lola-G	-1.48321	0.00126923	NA	NA	NA	LongSD up
FBgn0264911	CG44102	-2.47392	5.20156e-06	NA	NA	NA	LongSD up
FBgn0264916	asRNA:CR44107	-2.39318	4.76846e-05	NA	NA	NA	LongSD up
FBgn0264954	fd3F	-3.78844	1.52135e-07	NA	NA	NA	LongSD up
FBgn0264984	lncRNA:CR44135	-2.44595	0.00248174	NA	NA	NA	LongSD up
FBgn0264987	lncRNA:CR44138	-2.9713	2.53175e-05	NA	NA	NA	LongSD up
FBgn0265312	lncRNA:CR44285	-3.37698	0.00781815	NA	NA	NA	LongSD up
FBgn0265318	asRNA:CR44291	-3.33624	0.00066347	NA	NA	NA	LongSD up
FBgn0265348	lncRNA:CR44302	-3.34776	0.0202263	NA	NA	NA	LongSD up
FBgn0265499	asRNA:CR44368	-1.22315	0.0435025	NA	NA	NA	LongSD up
FBgn0265541	CR44391	-2.16007	0.0201572	NA	NA	NA	LongSD up
FBgn0265715	lncRNA:CR44522	-3.26159	0.000885658	NA	NA	NA	LongSD up
FBgn0265985	lncRNA:CR44764	-4.06028	1.53196e-06	NA	NA	NA	LongSD up
FBgn0266258	lncRNA:CR44953	-2.13121	0.00183812	NA	NA	NA	LongSD up
FBgn0266331	asRNA:CR44996	-1.85023	0.0458784	NA	NA	NA	LongSD up
FBgn0266432	CG45062	-3.38732	2.37651e-07	NA	NA	NA	LongSD up
FBgn0266886	lncRNA:CR45347	-1.29811	0.026462	NA	NA	NA	LongSD up
FBgn0267091	asRNA:CR45535	-1.30796	0.026462	NA	NA	NA	LongSD up
FBgn0267175	lncRNA:CR45615	-2.50133	0.0138568	NA	NA	NA	LongSD up
FBgn0267348	LanB2	-1.36439	0.000277077	YES	NA	NA	LongSD up
FBgn0267485	asRNA:CR45835	-5.77698	3.66526e-11	NA	NA	NA	LongSD up
FBgn0267703	lncRNA:CR46036	-4.56546	4.97688e-09	NA	NA	NA	LongSD up
FBgn0267762	asRNA:CR46093	-1.69856	0.0402929	NA	NA	NA	LongSD up
FBgn0267938	lncRNA:CR46218	-3.16645	0.0076367	NA	NA	NA	LongSD up
FBgn0267987	lncRNA:CR46254	-2.20466	0.00230658	NA	NA	NA	LongSD up
FBgn0283461	Drs	-1.69804	0.0411559	NA	YES	NA	LongSD up
FBgn0286788	Orc1	-3.66232	2.98422e-06	NA	NA	NA	LongSD up
