# Supplementary material for: Drosulfakinin signaling encodes early-life memory for adaptive social plasticity
Source: eLife. 2024 Dec 18;13:e103973. doi: 10.7554/eLife.103973 (PMC11706606; doi:10.7554/eLife.103973)
Supplement: Figure 5—source data 5. [file elife-103973-fig5-data5.xlsx]

## Sheet: Figure 5E_Raw data
Figure 5E
DGRP_line	SD	food intake		DGRP_line	SD	starvation-induced hyperactivity			DGRP_line	SD	aggression
32	30.2702	1.45		26	26.5909	780			26	26.5909	23.4116
40	25.7998	1.23		32	30.2702	1129.47			32	30.2702	8.3116
57	25.1731	1.12		40	25.7998	571.52			40	25.7998	13.5616
73	17.6224	1.04		57	25.1731	1203.03			57	25.1731	16.9116
75	29.0855	1.01		73	17.6224	481.66			73	17.6224	22.6616
93	23.2054	0.99		75	29.0855	726.09			75	29.0855	33.5116
109	28.0592	1.06		93	23.2054	351.28			93	23.2054	24.6616
129	27.2123	1.39		109	28.0592	976.88			109	28.0592	9.6116
161	30.5543	1.12		129	27.2123	606.18			129	27.2123	31.7116
181	30.7299	1.18		161	30.5543	648.05			161	30.5543	19.5616
195	24.5848	0.83		181	30.7299	519.25			181	30.7299	20.4116
217	30.8863	1.02		195	24.5848	374.19			195	24.5848	12.8616
228	25.9252	1.09		217	30.8863	1118.81			217	30.8863	42.9116
239	30.3661	1.31		228	25.9252	951.95			228	25.9252	5.1116
303	26.5496	0.92		239	30.3661	1491.03			303	26.5496	13.8616
317	32.0284	0.97		303	26.5496	745.11			317	32.0284	28.4116
320	26.7442	0.68		317	32.0284	1076.66			320	26.7442	25.8196
338	31.9111	1.2		320	26.7442	876.33			338	31.9111	20.6116
350	27.1231	1.26		338	31.9111	1202.39			350	27.1231	46.3116
357	29.3914	1.12		350	27.1231	868.46			357	29.3914	42.2616
359	32.3793	1.12		357	29.3914	1418.39			359	32.3793	16.9616
360	33.6816	1.25		359	32.3793	408.97			360	33.6816	23.5116
370	22.3978	0.85		360	33.6816	1218.96			370	22.3978	19.5616
380	24.5556	1.26		370	22.3978	650.11			380	24.5556	12.9696
386	25.7149	1.42		380	24.5556	1091.88			386	25.7149	21.0616
390	24.124	1.35		386	25.7149	817.98			390	24.124	19.3116
391	30.806	1.5		390	24.124	839.55			391	30.806	42.0216
426	24.1311	0.79		391	30.806	872.03			392	32.1294	43.4616
427	30.2543	1.22		392	32.1294	610.2			426	24.1311	20.0616
440	24.0173	1.15		426	24.1311	423.36			427	30.2543	47.3196
486	20.7415	1.31		427	30.2543	515.28			440	24.0173	10.4616
508	26.1752	0.92		440	24.0173	686.96			486	20.7415	22.5623
517	25.287	1.3		486	20.7415	915.31			508	26.1752	17.5116
551	21.8928	1.33		508	26.1752	1785.94			517	25.287	16.9216
563	20.6861	0.69		517	25.287	1090.94			528	31.3122	18.7116
630	25.8929	1.02		528	31.3122	1730.75			530	24.5124	45.1196
703	28.4541	1.21		530	24.5124	876.52			551	21.8928	12.2116
707	33.4999	1.24		551	21.8928	880.47			563	20.6861	37.0116
714	31.2453	0.91		563	20.6861	761.63			703	28.4541	31.2616
730	25.2879	0.82		566	21.5522	1780.75			707	33.4999	65.0816
738	29.7652	1.28		630	25.8929	742.23			714	31.2453	26.5816
765	30.3082	1.56		703	28.4541	931.77			730	25.2879	16.5318
774	29.5007	0.88		707	33.4999	1119.89			738	29.7652	32.8116
802	30.8798	1.14		714	31.2453	712.08			765	30.3082	43.2116
812	24.2828	0.81		730	25.2879	416.59			774	29.5007	52.6216
820	30.5627	1.51		738	29.7652	329.2			802	30.8798	40.4616
822	30.9734	1.34		765	30.3082	1954.5			812	24.2828	28.5816
837	23.3715	0.95		774	29.5007	1225.84			820	30.5627	50.3136
852	29.3682	0.97		802	30.8798	438.06			822	30.9734	73.0116
879	28.9824	0.74		812	24.2828	721.47			837	23.3715	44.0816
907	22.1793	0.83		820	30.5627	1718.77			843	29.9173	28.0116
908	27.2027	1.02		822	30.9734	962.09			850	31.3687	17.6616
				837	23.3715	764.16			852	29.3682	66.0816
				843	29.9173	1303.96			859	31.4821	18.7536
				850	31.3687	1000.47			879	28.9824	35.7616
				852	29.3682	990.63			907	22.1793	18.7616
				859	31.4821	1131.38			908	27.2027	36.7116
				879	28.9824	1070.61
				907	22.1793	726.95
				908	27.2027	1139.94

## Sheet: Figure 5_Statistics
Figure 5E
Garlapow et al. (2015)	normality test (Shapiro-Wilk test)		Passed normality test?
	food intake	p = 0.6337	Yes
	SD	p = 0.1566	Yes
	centroid velocity	**p = 0.0022	No
	walking speed	***p = 0.0003	No
	spearman r
	food intake vs SD	r = 0.2799	*p = 0.0444
	food intake vs centroid velocity	r = 0.4049	**p = 0.0029
	food intake vs walking speed	r = 0.4438	***p = 0.0010
Chi et al. (2021)	normality test (Shapiro-Wilk test)		Passed normality test?
	starvation-induced activity	*p = 0.0122	No
	SD	*p = 0.0381	No
	centroid velocity	**p = 0.0023	No
	walking speed	***p = 0.0002	No
	spearman r
	starvation-induced activty vs SD	r = 0.2645	*p = 0.0412
	starvation-induced activty vs centroid velocity	r = 0.3066	*p = 0.0172
	starvation-induced activty vs walking speed	r = 0.2795	*p = 0.0305
Shorter et al. (2015)	normality test (Shapiro-Wilk test)		Passed normality test?
	aggression	**p = 0.0018	No
	SD	*p = 0.0459	No
	centroid velocity	**p = 0.0030	No
	walking speed	***p = 0.0003	No
	spearman r
	aggression vs SD	r = 0.3017	*p = 0.0226
	aggression vs centroid velocity	r = 0.3048	*p = 0.0211
	aggression vs walking speed	r = 0.2696	*p = 0.0425

## Sheet: Figure 5 - Supplement 2_data
Figure 5 - Supplement 2
# lunges
DGRP73	DGRP563	DGRP370	DGRP360	DGRP707	DGRP317
3	2	3	8	11	8
2	1	3	6	5	4
0	3	2	10	4	10
2	1	2	3	6	9
0	4	1	5	7	6
2	0	0	6	4	2

## Sheet: Figure 5 - Supplement 2_Stat
Figure 5 - Supplement 2	1-way ANOVA, Tukey's multiple comparisons test
# lunges per 10 min	DGRP73 vs. DGRP563	p = 0.9998
(n = 6)	DGRP73 vs. DGRP370	p = 0.9998
	DGRP73 vs. DGRP360	**p = 0.0058
	DGRP73 vs. DGRP707	**p = 0.0082
	DGRP73 vs. DGRP317	**p = 0.0040
	DGRP563 vs. DGRP370	p > 0.9999
	DGRP563 vs. DGRP360	*p = 0.0116
	DGRP563 vs. DGRP707	*p = 0.0162
	DGRP563 vs. DGRP317	**p = 0.0082
	DGRP370 vs. DGRP360	*p = 0.0116
	DGRP370 vs. DGRP707	*p = 0.0162
	DGRP370 vs. DGRP317	**p = 0.0082
	DGRP360 vs. DGRP707	p > 0.9999
	DGRP360 vs. DGRP317	p > 0.9999
	DGRP707 vs. DGRP317	p = 0.9998
