# Supplementary material for: Drosulfakinin signaling encodes early-life memory for adaptive social plasticity
Source: eLife. 2024 Dec 18;13:e103973. doi: 10.7554/eLife.103973 (PMC11706606; doi:10.7554/eLife.103973)
Supplement: Figure 6—source data 1. [file elife-103973-fig6-data1.xlsx]

## Sheet: Figure 6B_Raw data
Figure 6B
DSK levels
	cell bodies
	MP1a_short_grp	MP1a_short_iso	MP1b_short_grp	MP1b_short_iso	MP3_short_grp	MP3_short_iso
DGRP73	38.388	26.9335	39.2355	27.0975	35.519	19.656
	34.2175	33.987	40.1695	33.313	36.689	28.491
	33.2475	27.05	38.208	39.939	27.1137	31.4208
	31.857	26.228	41.6595	28.86	27.7095	26.8568
	40.6265	35.1285	43.327	33.575	31.886	36.4665
DGRP563	36.5045	28.313	39.389	36.9585	37.4353	34.3603
	45.3125	19.833	44.4385	25.1795	34.3518	32.9457
	42.0975	40.618	36.5005	33.422	40.5812	22.0725
	35.634	24.324	40.1575	21.3165	35.021	21.4967
DGRP370	43.2925	31.6635	45.4	31.965	43.4735	30.788
	40.125	32.9685	36.665	39.8885	32.754	27.8117
	42.9985	37.472	44.294	35.3865	43.2353	44.8122
	41.8895	37.2145	43.3385	25.0645	42.6397	35.2668
DGRP360	44.875	33.605	47.3235	30.7915	45.943	25.0218
	52.528	39.7285	50.9145	35.298	54.1885	47.7085
	52.3495	43.6605	52.3075	36.702	54.2317	47.9667
	55	47.33	46.302	32.9745	68.277	46.125
	46.888	39.83	56.173	39.4445	58.5255	26.1187
DGRP707	55.872	39.1225	39.625	40.7545	60.7585	45.652
	44.769	39.3285	50.2915	32.884	43.776	33.8922
	62.5295	28.8525	40.944	28.854	69.0713	29.911
	46.25	31.5095	42.486	34.8645	49.0832	43.0427
DGRP317	49.845	41.375	54.309	39.3005	42.4365	33.7963
	50.9095	44.572	48.917	44.9865	58.7263	30.6917
	45.865	42.221	51.4445	37.3173	50.949	44.217
	45.8225	48.0888	44.294	35.3865	49.61	47.8177
	MP1a projection
	ShortSD_grp	ShortSD_iso		LongSD_grp	LongSD_iso
DGRP73	33.5225	15.2245	DGRP360	42.843	19.5535
	30.092	12.484		42.6085	20.9575
	32.615	22.2395		30.2125	20.8595
	30.5985	20.7305		30.3355	20.023
	31.4235	17.6995		37.986	15.8905
DGRP563	34.3535	12.794	DGRP707	34.9315	16.613
	30.6155	12.954		37.0985	9.3415
	37.172	11.0565		38.8495	18.0335
	32.518	10.345		29.566	19.7335
DGRP370	39.8185	15.178	DGRP317	35.163	13.9425
	22.0175	14.192		35.197	26.7515
	29.3625	10.345		35.047	16.8615
	35.9355	18.2455		39.6098	15.5785
	MP3 projection
	ShortSD_grp	ShortSD_iso		LongSD_grp	LongSD_iso
DGRP73	27.9025	18.889	DGRP360	31.989	23.0785
	24.6775	16.154		29.3285	23.6075
	23.0575	16.5645		31.751	25.2225
	26.5675	14.784		30.7475	25.597
	24.2155	16.7765		28.407	18.301
DGRP563	30.9805	28.0505	DGRP707	31.818	25.86
	28.544	17.8255		20.396	17.895
	33.77	16.6485		24.6585	18.4605
	32.756	25.984		29.7225	18.696
DGRP370	37.0225	13.5965	DGRP317	34.2415	25.8455
	28.0485	14.723		32.4655	11.445
	38.925	27.814		23.357	14.512
	37.756	19.422		29.1538	17.2445

## Sheet: Figure 6C_Raw data
Figure 6C
GCaMP7f signals
MP1a					MP1b					MP3
grp_ctrl	grp_Inj	iso_ctrl	iso_Inj		grp_ctrl	grp_Inj	iso_ctrl	iso_Inj		grp_ctrl	grp_Inj	iso_ctrl	iso_Inj
3.59625	4.99113	1.98657	1.78074		3.05295	6.33281	1.84207	3.76488		3.0992	5.6918	1.08967	3.83989
4.7968	4.38418	2.42568	2.08479		3.99549	4.67756	1.27675	3.73466		4.09812	4.19822	1.06126	2.71189
2.74464	3.91115	2.98308	2.4525		4.59947	3.8482	1.99599	2.82105		5.64633	4.96732	2.6423	4.91549
3.26636	3.46936	1.63913	2.49616		3.407	4.65726	1.87981	4.57242		2.42992	3.96931	2.4166	3.98177
2.36976	5.36826	2.03726	2.07132		3.44172	3.20977	1.94989	4.92424		4.96335	4.45222	2.25918	4.42671
3.53519	3.82184	2.73507	1.50971		3.30243	5.06222	1.8251	2.84354		3.58456	5.86032	2.32564	4.04938
2.29827	3.79979	2.26449	2.87383		3.66512	4.50648	3.79797	3.79476		2.8907	4.04628	2.01793	3.29143
4.35224	4.28369	1.18139	1.52714		3.77935	6.58204	2.39783	3.75881		3.93953	4.78734	2.25012	2.01457
2.92359	3.71651	1.06707	2.62759		3.64623	5.30971	3.92627	3.47791		2.18488	4.77508	2.39174	2.32108
2.74585	4.34225	2.10176	2.8889		5.33248	4.67965	2.67972	3.63711		3.30003	6.30257	1.27629	2.24059

## Sheet: Figure 6E_Raw data
Figure 6E
trans-Tango signals
male_grp	male_iso	female_grp	female_iso
0.617304	0.167327	0.464066	0.386529
0.719081	0.197576	0.403034	0.200819
0.693397	0.17734	0.381347	0.271068
1.33827	0.093273	0.431271	0.350603
0.942496	0.066381	0.452743	0.131068
0.834142	0.149194	0.253454	0.312506
1.61492	0.177625	0.249324	0.215215
1.34607	0.197279	0.407886	0.31156
0.583943	0.261871	0.25594	0.061571
1.3067	0.237308	0.17658	0.117555
1.25543	0.341571	0.241441	0.166246
0.749489	0.261437	0.302555	0.318503
0.998751	0.41837	0.314148	0.285233

## Sheet: Figure 6F_Raw data
Figure 6F
DSK levels
male_grp	male_iso	female_grp	female_iso
39.3115	19.958	32.3705	25.981
38.9935	22.9955	34.3745	26.9495
35.8905	20.8435	31.2955	34.8125
40.0025	21.902	34.0075	25.2745
36.6655	15.682	30.8155	23.382
36.3445	13.612	31.4785	27.0185
40.815	17.309	34.302	23.513
37.6375	12.65	32.709	23.8525
43.27	14.639	31.85	25.479
37.4775	16.5195	36.402	31.665
39.863	12.0015	32.435	22.246
34.882	21.1465	30.207	24.715
36.6655	16.6125	32.6915	17.9535

## Sheet: Figure 6_Statistics
Figure 6B
DSK levels	MP1a	normality test (Shapiro-Wilk test)		Passed normality test?
(cell bodies)	(n = 13)	short SD (grp)	p = 0.5889	Yes
		short SD (iso)	p = 0.9358	Yes
		long SD (grp)	p = 0.1012	Yes
		long SD (iso)	p = 0.4985	Yes
		equal variance test (Brown-Forsythe test)	p = 0.7254	Are SDs significantly different?
				No
		2-way ANOVA
		SD effects (column)	****p < 0.0001
		iso effects (row)	****p < 0.0001
		SD x iso interaction effects	p = 0.4467
		Tukey's multiple comparisons test
		short SD (grp) vs. long SD (grp)	****p < 0.0001
		short SD (grp) vs. short SD (iso)	**p = 0.0022
		long SD (grp) vs. long SD (iso)	****p < 0.0001
	MP1b	normality test (Shapiro-Wilk test)		Passed normality test?
	(n = 13)	short SD (grp)	p = 0.4413	Yes
		short SD (iso)	p = 0.6735	Yes
		long SD (grp)	p = 0.8679	Yes
		long SD (iso)	p = 0.9954	Yes
		equal variance test (Brown-Forsythe test)	p = 0.2564	Are SDs significantly different?
				No
		2-way ANOVA
		SD effects (column)	****p < 0.0001
		iso effects (row)	****p < 0.0001
		SD x iso interaction effects	p = 0.3080
		Tukey's multiple comparisons test
		short SD (grp) vs. long SD (grp)	**p = 0.0019
		short SD (grp) vs. short SD (iso)	****p < 0.0001
		long SD (grp) vs. long SD (iso)	****p < 0.0001
	MP3	normality test (Shapiro-Wilk test)		Passed normality test?
	(n = 13)	short SD (grp)	p = 0.4892	Yes
		short SD (iso)	p = 0.8586	Yes
		long SD (grp)	p = 0.5722	Yes
		long SD (iso)	*p = 0.0331	No
		equal variance test (Brown-Forsythe test)	p = 0.2557	Are SDs significantly different?
				No
		ART 2-way ANOVA
		SD effects (column)	****p < 0.0001
		iso effects (row)	****p < 0.0001
		SD x iso interaction effects	*p = 0.0374
		Wilcoxon rank sum test
		short SD (grp) vs. long SD (grp)	****p < 0.0001
		short SD (grp) vs. short SD (iso)	p = 0.2030
		long SD (grp) vs. long SD (iso)	**p = 0.0014
DSK levels	MP1a	normality test (Shapiro-Wilk test)		Passed normality test?
(projections)	(n = 13)	short SD (grp)	p = 0.1598	Yes
		short SD (iso)	p = 0.5135	Yes
		long SD (grp)	p = 0.8368	Yes
		long SD (iso)	p = 0.4177	Yes
		equal variance test (Brown-Forsythe test)	p = 0.9854	Are SDs significantly different?
				No
		2-way ANOVA
		SD effects (column)	**p = 0.0044
		iso effects (row)	****p < 0.0001
		SD x iso interaction effects	p = 0.7727
		Tukey's multiple comparisons test
		short SD (grp) vs. long SD (grp)	p = 0.1079
		short SD (grp) vs. short SD (iso)	****p < 0.0001
		long SD (grp) vs. long SD (iso)	****p < 0.0001
	MP3	normality test (Shapiro-Wilk test)		Passed normality test?
	(n = 13)	short SD (grp)	p = 0.4013	Yes
		short SD (iso)	*p = 0.0118	No
		long SD (grp)	p = 0.1297	Yes
		long SD (iso)	p = 0.1451	Yes
		equal variance test (Brown-Forsythe test)	p = 0.7131	Are SDs significantly different?
				No
		ART 2-way ANOVA
		SD effects (column)	p = 0.6713
		iso effects (row)	****p < 0.0001
		SD x iso interaction effects	p = 0.4452
		Wilcoxon rank sum test
		short SD (grp) vs. long SD (grp)	p = 1
		short SD (grp) vs. short SD (iso)	***p = 0.0004
		long SD (grp) vs. long SD (iso)	***p = 0.0008
Figure 6C	MP1a	normality test (Shapiro-Wilk test)		Passed normality test?
Dsk>GCaMP7	(n = 10)	ctrl (grp)	p = 0.4196	Yes
		ctrl (iso)	p = 0.8210	Yes
		inj (grp)	p = 0.3194	Yes
		inj (iso)	p = 0.3621	Yes
		equal variance test (Brown-Forsythe test)	p = 0.5852	Are SDs significantly different?
				No
		2-way ANOVA
		iso effects (column)	****p < 0.0001
		inj effects (row)	**p = 0.0088
		iso x inj interaction effects	p = 0.0731
		Tukey's multiple comparisons test
		ctrl (grp) vs. inj (grp)	*p = 0.0123
		ctrl (iso) vs. inj (iso)	p = 0.9140
		ctrl (grp) vs. ctrl (iso)	***p = 0.0009
	MP1b	normality test (Shapiro-Wilk test)		Passed normality test?
	(n = 10)	ctrl (grp)	p = 0.1059	Yes
		ctrl (iso)	p = 0.0530	Yes
		inj (grp)	p = 0.6220	Yes
		inj (iso)	p = 0.2431	Yes
		equal variance test (Brown-Forsythe test)	p = 0.7237	Are SDs significantly different?
				No
		2-way ANOVA
		iso effects (column)	****p < 0.0001
		inj effects (row)	****p < 0.0001
		iso x inj interaction effects	p = 0.5519
		Tukey's multiple comparisons test
		ctrl (grp) vs. inj (grp)	*p = 0.0306
		ctrl (iso) vs. inj (iso)	**p = 0.0033
		ctrl (grp) vs. ctrl (iso)	**p = 0.0017
	MP3	normality test (Shapiro-Wilk test)		Passed normality test?
	(n = 10)	ctrl (grp)	p = 0.7803	Yes
		ctrl (iso)	*p = 0.0256	No
		inj (grp)	p = 0.3701	Yes
		inj (iso)	p = 0.4778	Yes
		equal variance test (Brown-Forsythe test)	p = 0.2583	Are SDs significantly different?
				No
		2-way ANOVA
		Iso effects (column)	****p < 0.0001
		inj effects (row)	****p < 0.0001
		Iso x inj interaction effects	p = 0.8405
		Tukey's multiple comparisons test
		ctrl (grp) vs. inj (grp)	*p = 0.0137
		ctrl (iso) vs. inj (iso)	**p = 0.0064
		ctrl (grp) vs. ctrl (iso)	**p = 0.0012
Figure 6E	Dsk>transTango	normality test (Shapiro-Wilk test)		Passed normality test?
	transTango signals	male_grp	p = 0.2213	Yes
	(n = 13)	male_iso	p = 0.6270	Yes
		female_grp	p = 0.2809	Yes
		female_iso	p = 0.6652	Yes
		equal variance test (Brown-Forsythe test)	****p < 0.0001	Are SDs significantly different?
				Yes
		ART 2-way ANOVA
		gender effects (column)	****p < 0.0001
		iso effects (row)	****p < 0.0001
		gender x iso interaction effects	****p < 0.0001
		Wilcoxon rank sum test
		male_grp vs. male_iso	****p < 0.0001
		female_grp vs. female_iso	p = 0.3008
		male_grp vs. female_grp	****p < 0.0001
Figure 6F	Dsk>transTango	normality test (Shapiro-Wilk test)		Passed normality test?
	DSK levels	male_grp	p = 0.7345	Yes
	(n = 13)	male_iso	p = 0.4874	Yes
		female_grp	p = 0.6601	Yes
		female_iso	p = 0.3110	Yes
		equal variance test (Brown-Forsythe test)	p = 0.1227	Are SDs significantly different?
				No
		2-way ANOVA
		gender effects (column)	p = 0.1379
		iso effects (row)	****p < 0.0001
		gender x iso interaction effects	****p < 0.0001
		Tukey's multiple comparisons test
		male_grp vs. male_iso	****p < 0.0001
		female_grp vs. female_iso	****p < 0.0001
		male_grp vs. female_grp	***p = 0.0002

## Sheet: Figure 6 - Supplement 1A_data
Figure 6 - Supplement 1A
SD
DskGal4_grp_ctrl	DskGal4_grp_inj	DskGal4_iso_ctrl	DskGal4_iso_inj
26.5821	21.5566	28.6177	28.5805
28.4597	23.5273	27.4813	27.5659
28.3592	22.6212	27.4178	29.8992
25.4862	22.1842	28.529	27.2164
29.4308	20.2854	26.3071	28.3034
30.5882	21.2741	28.614	29.3124
27.3918	24.5415	25.4211	31.6138
28.3293	19.7151	30.3476	27.7527
Dsk_GCAMP7f_grp_ctrl	Dsk_GCAMP7f_grp_inj	Dsk_GCAMP7f_iso_ctrl	Dsk_GCAMP7f_iso_inj
32.2386	22.2864	31.0921	28.3129
29.753	23.3908	33.1712	27.195
23.9731	21.4832	28.9003	29.9045
28.6597	20.838	30.3006	31.0256
31.2327	23.0288	29.1198	25.1213
29.9662	21.1296	28.2557	27.8023
24.4475	26.5352	25.052	26.7766
27.3736	24.1148	32.039	24.6444
Dsk_DenMark_grp_ctrl	Dsk_DenMark_grp_inj	Dsk_DenMark_iso_ctrl	Dsk_DenMark_iso_inj
27.4969	23.6692	29.4957	24.5988
24.5329	21.6969	26.4001	28.6019
27.3469	18.7295	25.5771	30.4968
26.4392	22.3637	27.5925	29.6024
25.4228	20.1268	27.3519	25.6891
26.6298	22.5833	26.707	27.4392
28.7176	24.4228	28.627	27.2033
27.5968	20.5318	29.6051	30.6206

## Sheet: Figure 6 - Supplement 1C_data
Figure 6 - Supplement 1C
DenMark signals
MP1a_grp_ctrl	MP1a_grp_inj	MP1a_iso_ctrl	MP1a_iso_inj	MP1b_grp_ctrl	MP1b_grp_inj	MP1b_iso_ctrl	MP1b_iso_inj	MP3_grp_ctrl	MP3_grp_inj	MP3_iso_ctrl	MP3_iso_inj
48.333	45.755	38.5	43.181	43.833	49.054	52.667	45.279	48.323	43.043	46.667	42.679
45.917	45.939	47.667	55.48	50.333	47.943	35.3	50.091	48.005	48.048	40.8	45.165
38.75	42.716	40.012	47.122	39.435	41.515	42.75	41.761	46.059	45.245	59.3	45.48
52.667	52.997	55	40.018	37.783	43.393	46.333	41.497	45.231	51.166	56.417	55.398
40.192	46.965	43.575	50.107	40.812	55.814	47.511	51.114	50.08	49.763	49.441	52.381
51.5	56.214	51.571	45.273	46.778	44.442	40.306	37.691	56.5	45.257	50.333	54.11

## Sheet: Figure 6 - Supplement 2_data
Figure 6 - Supplement 2
GCaMP signals
grp_ctrl	grp_inj	Iso_ctrl	iso_inj
10.796	12.756	12.925	12.36
11.99	13.612	13.447	14.848
15.773	11.244	12.318	15.007
14.764	14.192	14.176	9.849
12.703	15.154	10.812	14.008

## Sheet: Figure 6 - Supplement 1_Stat
Figure 6 - Supplement 1A	Dsk-Gal4/+	normality test (Shapiro-Wilk test)		Passed normality test?
SD	(n = 8)	DskGal4_grp_ctrl	p = 0.9500	Yes
		DskGal4_grp_inj	p = 0.9774	Yes
		DskGal4_iso_ctrl	p = 0.8259	Yes
		DskGal4_iso_inj	p = 0.4161	Yes
		equal variance test (Brown-Forsythe test)	p = 0.9833	Are SDs significantly different?
				No
		ordinary 2-way ANOVA
		inj effect (row)	****p < 0.0001
		iso effect (column)	****p < 0.0001
		inj x iso effect	****p < 0.0001
		Tukey's multiple comparisons test
		ctrl:grp vs. inj:grp	****p < 0.0001
		ctrl:iso vs. inj:iso	p = 0.6248
		ctrl:grp vs. ctrl:iso	p = 0.9899
	Dsk>GCaMP7f	normality test (Shapiro-Wilk test)		Passed normality test?
	(n = 8)	Dsk_GCAMP7f_grp_ctrl	p = 0.4876	Yes
		Dsk_GCAMP7f_grp_inj	p = 0.4315	Yes
		Dsk_GCAMP7f_iso_ctrl	p = 0.8786	Yes
		Dsk_GCAMP7f_iso_inj	p = 0.8772	Yes
		equal variance test (Brown-Forsythe test)	p = 0.6291	Are SDs significantly different?
				No
		ordinary 2-way ANOVA
		inj effect (row)	***p = 0.0001
		iso effect (column)	**p = 0.0016
		inj x iso effect	p = 0.0540
		Tukey's multiple comparisons test
		ctrl:grp vs. inj:grp	***p = 0.0004
		ctrl:iso vs. inj:iso	p = 0.3125
		ctrl:grp vs. ctrl:iso	p = 0.7180
	Dsk>DenMark	normality test (Shapiro-Wilk test)		Passed normality test?
	(n = 8)	Dsk_DenMark_grp_ctrl	p = 0.8661	Yes
		Dsk_DenMark_grp_inj	p = 0.9598	Yes
		Dsk_DenMark_iso_ctrl	p = 0.6534	Yes
		Dsk_DenMark_iso_inj	p = 0.6328	Yes
		equal variance test (Brown-Forsythe test)	p = 0.3620	Are SDs significantly different?
				No
		ordinary 2-way ANOVA
		inj effect (row)	***p = 0.0008
		iso effect (column)	****p < 0.0001
		inj x iso effect	***p = 0.0002
		Tukey's multiple comparisons test
		ctrl:grp vs. inj:grp	****p < 0.0001
		ctrl:iso vs. inj:iso	p = 0.9759
		ctrl:grp vs. ctrl:iso	p = 0.7385
Figure 6 - Supplement 1C	MP1a	normality test (Shapiro-Wilk test)		Passed normality test?
DenMark signals	(n = 6)	ctrl (grp)	p = 0.4766	Yes
		inj (grp)	p = 0.3760	Yes
		ctrl (iso)	p = 0.7372	Yes
		inj (iso)	p = 0.9628	Yes
		equal variance test (Brown-Forsythe test)	p = 0.8119	Are SDs significantly different?
				No
		2-way ANOVA
		iso effects (column)	p = 0.7138
		inj effects (row)	p = 0.5267
		iso x inj interaction effects	p = 0.7686
		Tukey's multiple comparisons test
		ctrl (grp) vs. inj (grp)	p = 0.9084
		ctrl (iso) vs. inj (iso)	p = 0.9947
		ctrl (grp) vs. ctrl (iso)	p > 0.9999
	MP1b	normality test (Shapiro-Wilk test)		Passed normality test?
	(n = 6)	ctrl (grp)	p = 0.7737	Yes
		inj (grp)	p = 0.5726	Yes
		ctrl (iso)	p = 0.9954	Yes
		inj (iso)	p = 0.5875	Yes
		equal variance test (Brown-Forsythe test)	p = 0.9503	Are SDs significantly different?
				No
		2-way ANOVA
		iso effects (column)	p = 0.7385
		inj effects (row)	p = 0.3356
		iso x inj interaction effects	p = 0.4388
		Tukey's multiple comparisons test
		ctrl (grp) vs. inj (grp)	p = 0.6000
		ctrl (iso) vs. inj (iso)	p = 0.9990
		ctrl (grp) vs. ctrl (iso)	p = 0.9884
	MP3	normality test (Shapiro-Wilk test)		Passed normality test?
	(n = 6)	ctrl (grp)	p = 0.2034	Yes
		inj (grp)	p = 0.7344	Yes
		ctrl (iso)	p = 0.9127	Yes
		inj (iso)	p = 0.2626	Yes
		equal variance test (Brown-Forsythe test)	p = 0.2899	Are SDs significantly different?
				No
		2-way ANOVA
		iso effects (column)	p = 0.3903
		inj effects (row)	p = 0.4359
		iso x inj interaction effects	p = 0.8738
		Tukey's multiple comparisons test
		ctrl (grp) vs. inj (grp)	p = 0.9049
		ctrl (iso) vs. inj (iso)	p = 0.9692
		ctrl (grp) vs. ctrl (iso)	p = 0.9564

## Sheet: Figure 6 - Supplement 2-Stat
Figure 6 - Supplement 2	normality test (Shapiro-Wilk test)		Passed normality test?
Pdf>GCaMP7f	grp_ctrl	p = 0.7764	Yes
(n = 5)	grp_inj	p = 0.9572	Yes
	iso_ctrl	p = 0.8705	Yes
	iso_inj	p = 0.2835	Yes
	equal variance test (Brown-Forsythe test)	p = 0.7577	Are SDs significantly different?
			No
	ordinary 2-way ANOVA
	inj effect (row)	p = 0.6808
	iso effect (column)	p = 0.6892
	inj x iso interaction effect	p = 0.8562
	Tukey's multiple comparisons test
	ctrl:grp vs. inj:grp	p = 0.9983
	ctrl:iso vs. inj:iso	p = 0.9731
	ctrl:grp vs. ctrl:iso	p = 0.9745
