# Supplementary material for: Drosulfakinin signaling encodes early-life memory for adaptive social plasticity
Source: eLife. 2024 Dec 18;13:e103973. doi: 10.7554/eLife.103973 (PMC11706606; doi:10.7554/eLife.103973)
Supplement: Figure 7—source data 1. [file elife-103973-fig7-data1.xlsx]

## Sheet: Figure 7B_Raw data
Figure 7B
Dsk[attp]
CS_grp_ctrl	CS_grp_inj	CS_grp_rec	Dskattp_grp_ctrl	Dskattp_grp_inj	Dskattp_grp_rec
21.6674	15.3982	23.0797	26.7096	29.8703	25.3351
22.3728	16.8181	35.9344	36.2516	31.4859	24.6173
21.7575	19.7136	22.7797	30.5494	29.6281	29.9662
25.2477	21.9143	28.4215	26.7037	30.8286	27.625
25.1524	18.9658	26.3554	31.8217	21.8091	32.3475
22.8564	10.2063	21.0777	29.6974	27.9587	24.9483
28.1376	21.0714	23.2081	27.248	22.2072	27.0966
28.4735	17.2735	28.3264	29.5922	28.3129	24.1003
CCKLR-17D1[attp]
Y_grp_ctrl	Y_grp_inj	Y_grp_rec	17D1_grp_ctrl	17D1_grp_inj	17D1_grp_rec
26.2032	17.4241	26.2456	30.5757	29.8683	32.1045
25.354	20.6555	26.797	27.4001	32.4648	32.6268
27.9072	15.2235	16.4156	29.1273	27.3615	27.8107
23.465	18.7352	19.6751	28.737	30.9106	26.3635
21.1051	20.9071	22.3719	29.9919	25.4942	27.4586
24.7757	19.4366	23.9534	32.3886	34.9025	34.27
26.6133	18.7014	23.2212	35.3101	31.3326	29.5166
19.2847	16.7628	20.3288	29.063	30.571	27.7913
CCKLR-17D3[attp]
Y_grp_ctrl	Y_grp_inj	Y_grp_rec	17D3_grp_ctrl	17D3_grp_inj	17D3_grp_rec
22.4128	18.0741	19.989	26.3303	17.3241	24.041
27.7719	19.0637	26.8881	31.7863	19.7495	27.5778
29.6883	17.7523	24.0846	27.132	17.4919	21.5107
26.3033	20.2292	23.9978	27.7884	21.8009	26.7411
27.3098	17.1993	25.3333	20.036	23.3844	26.235
25.1419	21.1264	20.9054	24.532	17.1571	25.1937
20.6866	18.3664	23.9712	21.9842	23.9814	29.2389
26.6149	20.454	31.063	34.1926	20.463	28.4301

## Sheet: Figure 7C_Raw data
Figure 7C
Dsk-Gal4/+
grp_ctrl	grp_inj	grp_rec	iso_ctrl	iso_inj	iso_rec
33.7019	20.3114	28.2902	26.7259	31.2782	27.7434
26.6803	16.9603	28.13	28.9291	30.2416	21.3608
28.8451	18.5106	21.7101	29.5157	21.9934	30.3176
27.564	20.8472	23.2133	30.6827	24.3222	22.5614
31.1614	19.4297	30.0335	30.9121	29.759	27.4742
28.2966	23.9175	22.9896	29.3962	31.929	24.4683
21.5526	22.6445	29.6257	29.5226	29.7812	27.8072
28.7202	26.4222	30.4321	25.9986	25.3142	25.8641
UAS-Dsk RNAi/+
grp_ctrl	grp_inj	grp_rec	iso_ctrl	iso_inj	iso_rec
29.5383	19.8438	26.7428	31.5153	31.1889	29.1303
29.5552	21.5865	30.3178	28.7193	35.7506	27.6877
24.9937	19.8411	34.6523	27.3908	20.6878	29.4878
36.1949	19.6612	32.4951	31.2379	31.6549	26.7078
28.7335	20.0119	33.542	30.1725	26.5272	22.4134
35.4941	19.5521	24.7874	30.7942	28.8326	27.5296
29.7944	19.7782	28.4055	33.9011	32.5854	26.6396
31.0111	26.6782	25.8378	33.3359	28.8702	24.6837
Dsk-Gal4>Dsk RNAi
grp_ctrl	grp_inj	grp_rec	iso_ctrl	iso_inj	iso_rec
27.8956	30.205	22.9511	34.2445	33.5553	24.3472
25.7057	22.3472	26.0354	28.8807	31.0032	36.1015
24.9522	26.8245	26.8914	33.9907	30.531	32.2302
24.2899	29.8791	26.2563	29.8725	27.7902	32.01
22.4554	25.7206	24.2968	32.7375	28.4164	28.5338
23.026	20.8709	26.2281	28.7259	31.3055	27.8463
23.9021	29.6111	23.6461	31.4757	28.7362	28.4984
23.4783	32.01	24.0765	30.6822	31.8	24.1221

## Sheet: Figure 7E_Raw data
Figure 7E
18°C
DskGal4/+ ctrl	DskGal4/+ inj	DskGal4/+ rec	+/shibts ctrl	+/shibts inj	+/shibts rec	Dsk/shibts ctrl	Dsk/shibts inj	Dsk/shibtsrec
25.5555	24.2262	29.2991	27.2668	22.1961	25.9555	29.8586	25.9142	31.4587
28.869	22.18	26.7044	25.4122	24.7612	29.8684	30.4966	23.8361	32.7762
27.3033	23.4236	31.8976	25.0684	21.9454	26.4952	25.4977	21.7431	32.1113
29.3463	25.5989	27.9035	29.1712	24.627	27.8433	29.2166	23.034	28.0537
32.6796	23.416	29.3765	25.8297	22.3343	28.2774	33.5106	26.0974	27.637
27.8802	23.1674	34.0719	26.8539	19.2148	28.2984	27.7071	21.2724	36.0163
29°C
DskGal4/+ ctrl	DskGal4/+ inj	DskGal4/+ rec	+/shibts ctrl	+/shibts inj	+/shibts rec	Dsk/shibts ctrl	Dsk/shibts inj	Dsk/shibtsrec
29.8586	25.2139	28.6673	31.0576	28.5636	25.6566	28.4491	28.866	31.9601
30.4966	23.1918	24.4891	29.0236	24.4275	30.2114	29.2004	24.7097	30.9237
25.4977	21.1554	33.6822	31.6672	21.5433	26.7069	31.9942	28.9248	34.2776
29.2166	22.4115	37.0524	29.2166	22.4115	30.669	30.7608	31.6481	32.8932
25.1072	21.434	29.2176	29.1086	26.0567	29.9031	27.1436	27.3695	28.8493
29.9064	24.0276	33.1635	32.1722	21.7077	30.028	27.0633	27.6536	34.6026

## Sheet: Figure 7G_Raw data
Figure 7G
male
17D1-Gal4/+							UAS-NachBac/+							17D1-Gal4>UAS-NachBac
grp_ctrl	grp_inj	grp_rec	iso_ctrl	iso_inj	iso_rec		grp_ctrl	grp_inj	grp_rec	iso_ctrl	iso_inj	iso_rec		grp_ctrl	grp_inj	grp_rec	iso_ctrl	iso_inj	iso_rec
26.8483	21.5406	23.5012	20.7085	23.5108	28.2747		28.2946	20.6856	32.7087	29.0352	28.7623	27.3259		33.1279	17.7364	27.5973	32.3537	21.0448	31.2572
24.8172	20.9316	22.7854	21.4365	23.9677	24.7844		26.7871	23.7005	33.3109	24.5641	28.6211	26.7802		22.1507	18.0969	23.6003	16.9525	24.5409	30.329
22.7493	16.0652	24.6205	25.9205	23.4232	28.4958		34.5006	23.2406	34.2418	24.1074	26.5421	24.2848		23.5412	16.4572	22.9225	30.2189	18.4621	29.7316
20.5807	21.4055	21.5246	27.1396	25.118	25.8633		25.2108	24.1859	28.608	26.7461	27.4089	29.4444		22.3207	20.2668	25.1946	31.0636	19.3675	30.6626
19.0008	19.2906	26.4235	24.3018	27.9813	26.9603		35.6144	23.8425	30.5691	25.4383	21.0923	23.3226		33.2739	21.3135	21.3484	30.9107	19.7679	30.183
25.5041	22.8742	25.53	25.0391	27.8658	29.1386		28.8801	24.8511	26.2319	26.8757	28.6103	30.927		29.7547	23.8172	27.126	27.6679	28.1463	31.793
26.0497	24.0633	25.4052	24.6923	27.5358	29.3085		32.4692	28.1746	32.3518	24.7319	29.5334	21.796		31.3849	21.3428	25.7905	32.453	18.9058	30.0484
27.6466	13.7409	26.0264	22.2829	29.0707	26.3962		34.1892	28.072	29.4219	24.4216	26.6337	24.3733		30.7234	18.2723	27.7014	31.498	23.813	33.6477
female
17D1-Gal4/+							UAS-NachBac/+							17D1-Gal4>UAS-NachBac
grp_ctrl	grp_inj	grp_rec	iso_ctrl	iso_inj	iso_rec		grp_ctrl	grp_inj	grp_rec	iso_ctrl	iso_inj	iso_rec		grp_ctrl	grp_inj	grp_rec	iso_ctrl	iso_inj	iso_rec
31.9644	34.5943	32.7768	33.2525	33.8815	33.9368		30.7894	24.2336	35.6617	33.4141	32.194	29.3746		30.8305	25.1451	31.6573	27.79	32.737	29.4272
36.0781	31.7864	33.9024	33.6487	35.0324	33.1312		35.8847	31.1727	34.2031	32.2607	32.3167	33.8606		35.1063	23.2677	25.9759	20.8879	21.2946	30.8673
34.4069	33.6834	35.3157	33.9753	31.4417	31.6086		37.2883	39.1774	34.0092	30.7318	31.5808	27.6277		24.1231	34.803	25.2888	21.9106	24.7019	24.9489
30.8846	31.8729	32.218	34.7148	32.8533	32.8448		27.0685	36.8537	33.5997	33.2185	34.2003	29.4541		23.8361	32.9085	30.5507	30.2506	24.7614	25.3593
34.3877	34.4318	35.2395	32.2112	33.9445	34.9891		37.0416	36.9084	35.3778	33.4196	33.1591	29.5042		30.1385	34.535	32.385	30.4389	20.3011	27.1524
37.7886	32.2299	37.1086	33.2872	32.585	31.1888		36.4024	27.9351	37.1102	31.2176	32.912	32.3721		31.7933	32.3452	31.6841	25.65	27.6448	26.8361
26.4779	32.2489	34.1549	34.4341	33.163	33.5101		34.2499	38.9416	34.1304	33.4785	32.3164	34.3947		32.8475	33.3015	35.2161	26.4316	21.1025	31.5928
36.0503	35.1201	37.7527	33.7708	33.5853	34.164		36.8222	37.006	39.5268	32.2039	33.1078	31.0305		33.4787	34.9506	35.7084	22.2781	26.723	27.509

## Sheet: Figure 7_Statistics
Figure 7B	CS vs. Dsk[attP]	normality test (Shapiro-Wilk test)		Passed normality test?
SD	(n = 8)	CS_ctrl	p = 0.1456	Yes
		CS_inj	p = 0.4709	Yes
		CS_rec	p = 0.1725	Yes
		Dsk[attP]_ctrl	p = 0.2072	Yes
		Dsk[attP]_inj	p = 0.0543	Yes
		Dsk[attP]_rec	p = 0.2497	Yes
		equal variance test (Brown-Forsythe test)	p = 0.8436	Are SDs significantly different?
				No
	ctrl vs inj	2-way ANOVA
		Dsk effects (row)	****p < 0.0001
		injury effects (column)	***p = 0.0009
		Dsk x injury interaction effects	p = 0.0577
		Tukey's multiple comparisons test
		CS:ctrl vs. CS:inj	**p = 0.0021
		CS:ctrl vs. DskattP:ctrl	*p = 0.0180
		DskattP:ctrl vs. DskattP:inj	p = 0.6205
	ctrl vs rec	2-way ANOVA
		Dsk effects (row)	*p = 0.0182
		recovery effects (column)	p = 0.6529
		Dsk x recovery interaction effects	p = 0.0799
		Tukey's multiple comparisons test
		CS:ctrl vs. CS:rec	p = 0.7709
		CS:ctrl vs. DskattP:ctrl	*p = 0.0237
		DskattP:ctrl vs. DskattP:rec	p = 0.3914
	(+)/Y vs 17D1[attP]	normality test (Shapiro-Wilk test)		Passed normality test?
	(n = 8)	(+)/Y_ctrl	p = 0.6140	Yes
		(+)/Y_inj	p = 0.8018	Yes
		(+)/Y_rec	p = 0.8557	Yes
		17D1[attP]_ctrl	p = 0.2993	Yes
		17D1[attP]_inj	p = 0.8985	Yes
		17D1[attP]_rec	p = 0.2992	Yes
		equal variance test (Brown-Forsythe test)	p = 0.7930	Are SDs significantly different?
				No
	ctrl vs inj	2-way ANOVA
		17D1 effects (row)	****p < 0.0001
		injury effects (column)	**p = 0.0036
		17D1 x injury interaction effects	**p = 0.0033
		Tukey's multiple comparisons test
		(+)/Y:ctrl vs. (+)/Y:inj	***p = 0.0006
		(+)/Y:ctrl vs. 17D1/Y:ctrl	***p = 0.0004
		17D1/Y:ctrl vs. 17D1/Y:inj	p > 0.9999
	ctrl vs rec	2-way ANOVA
		17D1 effects (row)	****p < 0.0001
		injury effects (column)	p = 0.2351
		17D1 x injury interaction effects	p = 0.5154
		Tukey's multiple comparisons test
		(+)/Y:ctrl vs. (+)/Y:rec	p = 0.5560
		(+)/Y:ctrl vs. 17D1/Y:ctrl	**p = 0.0020
		17D1/Y:ctrl vs. 17D1/Y:rec	p = 0.9791
	(+)/Y vs 17D3[attP]	normality test (Shapiro-Wilk test)		Passed normality test?
	(n = 8)	(+)/Y_ctrl	p = 0.6472	Yes
		(+)/Y_inj	p = 0.5809	Yes
		(+)/Y_rec	p = 0.5699	Yes
		17D3[attP]_ctrl	p = 0.9275	Yes
		17D3[attP]_inj	p = 0.2754	Yes
		17D3[attP]_rec	p = 0.8380	Yes
		equal variance test (Brown-Forsythe test)	p = 0.3298	Are SDs significantly different?
				No
	ctrl vs inj	2-way ANOVA
		17D3 effects (row)	p = 0.3530
		injury effects (column)	****p < 0.0001
		17D3 x injury interaction effects	p = 0.9456
		Tukey's multiple comparisons test
		(+)/Y:ctrl vs. (+)/Y:inj	**p = 0.0012
		(+)/Y:ctrl vs. 17D3/Y:ctrl	p = 0.9251
		17D3/Y:ctrl vs. 17D3/Y:inj	**p = 0.0016
	ctrl vs rec	2-way ANOVA
		17D3 effects (row)	p = 0.3070
		recovery effects (column)	p = 0.4694
		17D3 x injury interaction effects	p = 0.8069
		Tukey's multiple comparisons test
		(+)/Y:ctrl vs. (+)/Y:rec	p = 0.8989
		(+)/Y:ctrl vs. 17D3/Y:ctrl	p = 0.9427
		17D3/Y:ctrl vs. 17D3/Y:rec	p = 0.9857
Figure 7C	Dsk-Gal4/+ grp vs. iso	normality test (Shapiro-Wilk test)		Passed normality test?
SD	(n = 8)	grp_ctrl	p = 0.6066	Yes
		grp_inj	p = 0.9477	Yes
		grp_rec	p = 0.0737	Yes
		iso_ctrl	p = 0.1884	Yes
		iso_inj	p = 0.1649	Yes
		iso_rec	p = 0.7569	Yes
		equal variance test (Brown-Forsythe test)	p = 0.7404	Are SDs significantly different?
				No
	ctrl vs inj	2-way ANOVA
		iso effects (row)	**p = 0.0017
		injury effects	***p = 0.0010
		iso x injury effects	**p = 0.0075
		Tukey's multiple comparisons test
		grp: Dsk-Gal4/+ (ctrl) vs. (inj)	***p = 0.0004
		iso: Dsk-Gal4/+ (ctrl) vs. (inj)	p = 0.9400
	ctrl vs rec	2-way ANOVA
		iso effects (row)	p = 0.9236
		recovery effects	*p = 0.0448
		iso x recovery effects	p = 0.4922
		Tukey's multiple comparisons test
		grp: Dsk-Gal4/+ (ctrl) vs. (rec)	p = 0.7544
		iso: Dsk-Gal4/+ (ctrl) vs. (rec)	p = 0.2204
	Dsk[RNAi]/+ grp vs. iso	normality test (Shapiro-Wilk test)		Passed normality test?
	(n = 8)	grp_ctrl	p = 0.3260	Yes
		grp_inj	***p = 0.0001	No
		grp_rec	p = 0.5704	Yes
		iso_ctrl	p = 0.8934	Yes
		iso_inj	p = 0.6830	Yes
		iso_rec	p = 0.4974	Yes
		equal variance test (Brown-Forsythe test)	p = 0.2784	Are SDs significantly different?
				No
	ctrl vs inj	2-way ANOVA
		iso effects (row)	***p = 0.0008
		injury effects	****p < 0.0001
		iso x injury effects	**p = 0.0013
		Tukey's multiple comparisons test
		grp: Dsk[RNAi]/+ (ctrl) vs. (inj)	****p < 0.0001
		iso: Dsk[RNAi]/+ (ctrl) vs. (inj)	p = 0.8432
	ctrl vs rec	2-way ANOVA
		iso effects (row)	p = 0.2395
		recovery effects	*p = 0.0236
		iso x recovery effects	p = 0.1711
		Tukey's multiple comparisons test
		grp: Dsk[RNAi]/+ (ctrl) vs. (rec)	p = 0.8966
		iso: Dsk[RNAi]/+ (ctrl) vs. (rec)	p = 0.0551
	Dsk>Dsk[RNAi] grp vs. iso	normality test (Shapiro-Wilk test)		Passed normality test?
	(n = 8)	grp_ctrl	p = 0.5257	Yes
		grp_inj	p = 0.4317	Yes
		grp_rec	p = 0.2852	Yes
		iso_ctrl	p = 0.4305	Yes
		iso_inj	p = 0.7313	Yes
		iso_rec	p = 0.6007	Yes
		equal variance test (Brown-Forsythe test)	p = 0.0594	Are SDs significantly different?
				No
	ctrl vs inj	2-way ANOVA
		iso effects (row)	****p < 0.0001
		injury effects	p = 0.3424
		iso x injury effects	p = 0.0581
		Tukey's multiple comparisons test
		grp: Dsk>Dsk[/RNAi] (ctrl) vs. (inj)	p = 0.1843
		iso: Dsk>Dsk[/RNAi] (ctrl) vs. (inj)	p = 0.8907
	ctrl vs rec	2-way ANOVA
		iso effects (row)	****p < 0.0001
		recovery effects	p = 0.4079
		iso x recovery effects	p = 0.1495
		Tukey's multiple comparisons test
		grp: Dsk>Dsk[/RNAi] (ctrl) vs. (rec)	p = 0.9683
		iso: Dsk>Dsk[/RNAi] (ctrl) vs. (rec)	p = 0.3724
Figure 7E	Dsk-Gal4/+ 18°C vs. 29°C	normality test (Shapiro-Wilk test)		Passed normality test?
SD	(n = 6)	18°C_ctrl	p = 0.7872	Yes
		18°C_inj	p = 0.6598	Yes
		18°C_rec	p = 0.7372	Yes
		29°C_ctrl	*p = 0.0467	No
		29°C_inj	p = 0.7857	Yes
		29°C_rec	p = 0.9047	Yes
		equal variance test (Brown-Forsythe test)	p = 0.0811	Are SDs significantly different?
				No
	ctrl vs inj	2-way ANOVA
		temperature effects (row)	p = 0.5289
		injury effects (column)	****p < 0.0001
		temperature x injury interaction effects	p = 0.7549
		Tukey's multiple comparisons test
		18°C: Dsk-Gal4/+ (ctrl) vs. (inj)	**p = 0.0015
		29°C: Dsk-Gal4/+ (ctrl) vs. (inj)	***p = 0.0005
	ctrl vs rec	2-way ANOVA
		temperature effects (row)	p = 0.7232
		recovery effects (column)	p = 0.1336
		temperature x recovery effects	p = 0.5798
		Tukey's multiple comparisons test
		18°C: Dsk-Gal4/+ (ctrl) vs. (rec)	p = 0.8929
		29°C: Dsk-Gal4/+ (ctrl) vs. (rec)	p = 0.4539
	shi[ts]/+ 18°C vs. 29°C	normality test (Shapiro-Wilk test)		Passed normality test?
	(n = 6)	18°C_ctrl	p = 0.5075	Yes
		18°C_inj	p = 0.3706	Yes
		18°C_rec	p = 0.7390	Yes
		29°C_ctrl	p = 0.1129	Yes
		29°C_inj	p = 0.3571	Yes
		29°C_rec	p = 0.0501	Yes
		equal variance test (Brown-Forsythe test)	p = 0.6382	Are SDs significantly different?
				No
	ctrl vs inj	2-way ANOVA
		temperature effects (row)	**p = 0.0039
		injury effects (column)	****p < 0.0001
		temperature x injury effects	p = 0.2030
		Tukey's multiple comparisons test
		18°C: shi[ts]/+ (ctrl) vs. (inj)	*p = 0.0109
		29°C: shi[ts]/+ (ctrl) vs. (inj)	***p = 0.0002
	ctrl vs rec	2-way ANOVA
		temperature effects (row)	**p = 0.0017
		recovery effects (column)	p = 0.8124
		temperature x recovery effects	p = 0.0576
		Tukey's multiple comparisons test
		18°C: shi[ts]/+ (ctrl) vs. (rec)	p = 0.6009
		29°C: shi[ts]/+ (ctrl) vs. (rec)	p = 0.4038
	Dsk>shi[ts] 18°C vs. 29°C	normality test (Shapiro-Wilk test)		Passed normality test?
	(n = 6)	18°C_ctrl	p = 0.9748	Yes
		18°C_inj	p = 0.4129	Yes
		18°C_rec	p = 0.6163	Yes
		29°C_ctrl	p = 0.5430	Yes
		29°C_inj	p = 0.8374	Yes
		29°C_rec	p = 0.7448	Yes
		equal variance test (Brown-Forsythe test)		Are SDs significantly different?
			p = 0.9467	No
	ctrl vs inj	2-way ANOVA
		temperature effects (row)	*p = 0.0320
		injury effects (column)	**p = 0.0018
		temperature x injury effects	*p = 0.0169
		Tukey's multiple comparisons test
		18°C: Dsk>shi[ts] (ctrl) vs. (inj)	**p = 0.0015
		29°C: Dsk>shi[ts] (ctrl) vs. (inj)	p = 0.8987
	ctrl vs rec	2-way ANOVA
		temperature effects (row)	p = 0.7641
		recovery effects (column)	*p = 0.0227
		temperature x recovery effects	p = 0.5723
		Tukey's multiple comparisons test
		18°C: Dsk>shi[ts] (ctrl) vs. (rec)	p = 0.5495
		29°C: Dsk>shi[ts] (ctrl) vs. (rec)	p = 0.1712
Figure 7G	17D1-Gal4/+ grp vs. iso	normality test (Shapiro-Wilk test)		Passed normality test?
SD (male)	(n = 8)	grp_ctrl	p = 0.4340	Yes
		grp_inj	p = 0.3803	Yes
		grp_rec	p = 0.5165	Yes
		iso_ctrl	p = 0.7283	Yes
		iso_inj	p = 0.1344	Yes
		iso_rec	p = 0.5482	Yes
		equal variance test (Brown-Forsythe test)	p = 0.6155	Are SDs significantly different?
				No
	ctrl vs inj	2-way ANOVA
		iso effects (row)	**p = 0.0067
		injury effects (column)	p = 0.3163
		iso x injury interaction effects	**p =0.0040
		Tukey's multiple comparisons test
		grp: 17D1-Gal4/+ (ctrl) vs. (inj)	*p =0.0311
		iso: 17D1-Gal4/+ (ctrl) vs. (inj)	p = 0.4522
	ctrl vs rec	2-way ANOVA
		iso effects	p = 0.0990
		recovery effects	*p =0.0243
		iso x recovery effects	p = 0.0588
		Tukey's multiple comparisons test
		Grp: 17D1-Gal4/+ (ctrl) vs. (rec)	p = 0.9912
		Iso: 17D1-Gal4/+ (ctrl) vs. (rec)	*p = 0.0227
	NachBac/+ grp vs. iso	normality test (Shapiro-Wilk test)		Passed normality test?
	(n = 8)	grp_ctrl	p = 0.4035	Yes
		grp_inj	p = 0.3153	Yes
		grp_rec	p = 0.7186	Yes
		iso_ctrl	p = 0.1549	Yes
		iso_inj	*p = 0.0156	No
		iso_rec	p = 0.7990	Yes
		equal variance test (Brown-Forsythe test)	p = 0.1262	Are SDs significantly different?
				No
	ctrl vs inj	2-way ANOVA
		iso effects (row)	p = 0.2294
		injury effects (column)	*p = 0.0244
		iso x injury interaction effects	***p = 0.0007
		Tukey's multiple comparisons test
		grp: NachBac/+ (ctrl) vs. (inj)	***p = 0.0009
		iso: NachBac/+ (ctrl) vs. (inj)	p = 0.7497
	ctrl vs rec	2-way ANOVA
		iso effects	****p < 0.0001
		recovery effects	p = 0.8220
		iso x recovery effects	p = 0.9608
		Tukey's multiple comparisons test
		grp: NachBac/+ (ctrl) vs. (rec)	p = 0.9993
		iso: NachBac/+ (ctrl) vs. (rec)	p = 0.9973
	17D1>NachBac grp vs. iso	normality test (Shapiro-Wilk test)		Passed normality test?
	(n = 8)	grp_ctrl	p = 0.0573	Yes
		grp_inj	p = 0.6736	Yes
		grp_rec	p = 0.4610	Yes
		iso_ctrl	***p = 0.0009	No
		iso_inj	p = 0.1883	Yes
		iso_rec	p = 0.1088	Yes
		equal variance test (Brown-Forsythe test)	p = 0.3721	Are SDs significantly different?
				No
	ctrl vs inj	2-way ANOVA
		iso effects (row)	p = 0.3180
		injury effects (column)	****p < 0.0001
		iso x injury interaction effects	p = 0.6727
		Tukey's multiple comparisons test
		grp: 17D1>NachBac (ctrl) vs. (inj)	**p = 0.0013
		iso: 17D1>NachBac (ctrl) vs. (inj)	**p = 0.0063
	ctrl vs rec	2-way ANOVA
		iso effects	*p = 0.0187
		recovery effects	p = 0.6273
		iso x recovery effects	p = 0.0742
		Tukey's multiple comparisons test
		grp: 17D1>NachBac (ctrl) vs. (rec)	p = 0.3637
		iso: 17D1>NachBac (ctrl) vs. (rec)	p = 0.7704
Figure 7G	17D1-Gal4/+ grp vs. iso	normality test (Shapiro-Wilk test)		Passed normality test?
SD (female)	(n = 8)	grp_ctrl	p = 0.4631	Yes
		grp_inj	p = 0.1269	Yes
		grp_rec	p = 0.7545	Yes
		iso_ctrl	p = 0.8225	Yes
		iso_inj	p = 0.9736	Yes
		iso_rec	p = 0.8201	Yes
		equal variance test (Brown-Forsythe test)	*p = 0.0300	Are SDs significantly different?
				Yes
	ctrl vs inj	2-way ANOVA
		iso effects (row)	p = 0.8790
		injury effects (column)	p = 0.6762
		iso x injury interaction effects	p = 0.9496
		Tukey's multiple comparisons test
		grp: 17D1-Gal4/+ (ctrl) vs. (inj)	p = 0.9942
		iso: 17D1-Gal4/+ (ctrl) vs. (inj)	p = 0.9858
	ctrl vs rec	2-way ANOVA
		iso effects	p = 0.3466
		recovery effects	p = 0.6028
		iso x recovery effects	p = 0.2557
		Tukey's multiple comparisons test
		grp: 17D1-Gal4/+ (ctrl) vs. (rec)	p = 0.6364
		iso: 17D1-Gal4/+ (ctrl) vs. (rec)	p = 0.9694
	NachBac/+ grp vs. iso	normality test (Shapiro-Wilk test)		Passed normality test?
	(n = 8)	grp_ctrl	*p = 0.0239	No
		grp_inj	p = 0.0863	Yes
		grp_rec	p = 0.0982	Yes
		iso_ctrl	p = 0.1032	Yes
		iso_inj	p = 0.7246	Yes
		iso_rec	p = 0.5026	Yes
		equal variance test (Brown-Forsythe test)	p = 0.1048	Are SDs significantly different?
				No
	ctrl vs inj	2-way ANOVA
		iso effects (row)	p = 0.1866
		injury effects (column)	p = 0.9394
		iso x injury interaction effects	p = 0.7904
		Tukey's multiple comparisons test
		grp: NachBac/+ (ctrl) vs. (inj)	p = 0.9948
		iso: NachBac/+ (ctrl) vs. (inj)	p = 0.9991
	ctrl vs rec	2-way ANOVA
		iso effects	***p = 0.0009
		recovery effects	p = 0.7629
		iso x recovery effects	p = 0.1553
		Tukey's multiple comparisons test
		grp: NachBac/+ (ctrl) vs. (rec)	p = 0.8458
		iso: NachBac/+ (ctrl) vs. (rec)	p = 0.6025
	17D1>NachBac grp vs. iso	normality test (Shapiro-Wilk test)		Passed normality test?
	(n = 8)	grp_ctrl	p = 0.1495	Yes
		grp_inj	*p = 0.0103	No
		grp_rec	p = 0.3189	Yes
		iso_ctrl	p = 0.3774	Yes
		iso_inj	p = 0.4315	Yes
		iso_rec	p = 0.5291	Yes
		equal variance test (Brown-Forsythe test)	p = 0.9400	Are SDs significantly different?
				No
	ctrl vs inj	2-way ANOVA
		iso effects (row)	***p = 0.0008
		injury effects (column)	p = 0.9086
		iso x injury interaction effects	p = 0.5170
		Tukey's multiple comparisons test
		grp: 17D1>NachBac (ctrl) vs. (inj)	p = 0.9469
		iso: 17D1>NachBac (ctrl) vs. (inj)	p = 0.9806
	ctrl vs rec	2-way ANOVA
		iso effects	**p = 0.0054
		recovery effects	p = 0.2410
		iso x recovery effects	p = 0.5683
		Tukey's multiple comparisons test
		grp: 17D1>NachBac (ctrl) vs. (rec)	p = 0.9712
		iso: 17D1>NachBac (ctrl) vs. (rec)	p = 0.5980

## Sheet: Figure 7 - Supplement 2A_data
Figure 7 - Supplement 2A
+Y_ctrl	+Y_inj	17D1[delta1]_ctrl	17D1[delta1]_inj
24.4073	21.7192	33.3756	31.7532
25.5198	18.6816	32.4954	36.7193
27.158	20.4972	35.117	29.5224
22.575	23.6827	28.5429	30.7162
22.6136	20.6243	29.5759	32.6467
24.4871	17.5471	31.4526	28.5798
27.6731	19.3358	30.6475	30.3737
23.1761	24.2574	32.1529	29.2974
+Y_ctrl	+Y_inj	17D1[delta2]_ctrl	17D1[delta2]_inj
26.325	21.2467	34.3615	37.2741
27.313	17.1388	31.3515	28.1615
23.9151	23.2622	30.1136	31.2996
25.6242	20.2246	28.6447	28.264
30.3346	18.1856	33.3698	30.2145
27.3908	24.2169	31.4154	33.2554
26.3364	19.7427	25.3582	34.7774
22.6197	24.6161	35.6574	26.6369

## Sheet: Figure 7 - Supplement 2B_data
Figure 7 - Supplement 2B
+Y_ctrl	+Y_inj	17D3[delta1]_ctrl	17D3[delta1]_inj
26.315	22.7047	28.3491	18.7365
26.712	22.4414	27.7381	20.4791
26.2478	24.37	24.2701	18.4081
24.588	19.6197	27.6206	21.6431
25.5708	21.1208	23.6081	17.1445
23.6675	19.554	23.705	22.5797
27.2195	22.3694	25.2418	20.4064
23.5868	20.5722	28.6082	21.606
+Y_ctrl	+Y_inj	17D3[delta2]_ctrl	17D3[delta2]_inj
23.4496	18.7118	26.4811	21.7459
25.1737	25.4122	24.2042	22.2704
26.4624	21.9861	25.5022	24.1179
23.6226	17.5062	31.6464	20.5451
28.6437	21.3085	27.6755	17.3467
27.1499	20.2197	28.1748	22.2575
22.7113	19.3207	26.7355	19.3578
24.5897	21.6435	20.6278	21.6673

## Sheet: Figure 7 - Supplement 3_data
Figure 7 - Supplement 3
17D1_Gal4_grp_ctrl	17D1_Gal4_grp_inj	TNT_grp_ctrl	TNT_grp_inj	17D1_TNT_grp_ctrl	17D1_TNT_grp_inj
23.1785	18.4634	25.2197	20.4959	29.7018	26.3819
26.506	18.4583	23.5433	23.4772	27.6076	27.5223
24.6704	20.4655	23.1015	19.4958	22.6693	27.5108
22.4664	19.3834	26.4907	19.4228	25.4669	25.5829
28.5698	21.4537	26.5526	19.4939	26.3387	28.5295
25.5817	16.3697	27.6189	20.3119	25.6221	24.5672
25.6277	23.3072	24.6675	21.4	24.4315	26.654
26.4384	20.5899	22.461	20.6215	28.4621	24.6349

## Sheet: Figure 7 - Supplement 2_Stat
Figure 7 - Supplement 2A	17D1_delta1	normality test (Shapiro-Wilk test)		Passed normality test?
SD	(n = 8)	Y_ctrl	p = 0.3329	Yes
		Y_inj	p = 0.7842	Yes
		17D1[delta1]_ctrl	p = 0.9978	Yes
		17D1[delta1]_inj	p = 0.1457	Yes
		equal variance test (Brown-Forsythe test)	p = 0.9797	Are SDs significantly different?
				No
		ordinary 2-way ANOVA
		inj effect (row)	*p = 0.0107
		17D1 effect (column)	****p < 0.0001
		inj x 17D1 interaction effect	*p = 0.0404
		Tukey's multiple comparisons test
		ctrl:+/Y vs. inj:+/Y	**p = 0.0091
		ctrl:delta vs. inj:delta	p = 0.9755
		ctrl:+/Y vs. ctrl:delta	****p < 0.0001
	17D1_delta2	normality test (Shapiro-Wilk test)		Passed normality test?
	(n = 8)	Y_ctrl	p = 0.8457	Yes
		Y_inj	p = 0.6377	Yes
		17D1[delta2]_ctrl	p = 0.9048	Yes
		17D1[delta2]_inj	p = 0.7842	Yes
		equal variance test (Brown-Forsythe test)	p = 0.5401	Are SDs significantly different?
				No
		ordinary 2-way ANOVA
		inj effect (row)	*p = 0.0230
		17D1 effect (column)	****p < 0.0001
		inj x 17D1 interaction effect	*p = 0.0254
		Tukey's multiple comparisons test
		ctrl:+/Y vs. inj:+/Y	*p = 0.0111
		ctrl:delta vs. inj:delta	p > 0.9999
		ctrl:+/Y vs. ctrl:delta	*p = 0.0131
Figure 7 - Supplement 2B	17D3_delta1	normality test (Shapiro-Wilk test)		Passed normality test?
SD	(n = 8)	Y_ctrl	p = 0.3406	Yes
		Y_inj	p = 0.5971	Yes
		17D3[delta1]_ctrl	p = 0.0891	Yes
		17D3[delta1]_inj	p = 0.6925	Yes
		equal variance test (Brown-Forsythe test)	p = 0.3199	Are SDs significantly different?
				No
		ordinary 2-way ANOVA
		inj effect (row)	****p < 0.0001
		17D3 effect (column)	p = 0.5257
		inj x 17D3 interaction effect	p = 0.1051
		Tukey's multiple comparisons test
		ctrl:+/Y vs. inj:+/Y	***p = 0.0009
		ctrl:delta vs. inj:delta	****p < 0.0001
		ctrl:+/Y vs. ctrl:delta	p = 0.8842
	17D3_delta2	normality test (Shapiro-Wilk test)		Passed normality test?
	(n = 8)	Y_ctrl	p = 0.7405	Yes
		Y_inj	p = 0.7665	Yes
		17D3[delta2]_ctrl	p = 0.8939	Yes
		17D3[delta2]_inj	p = 0.6684	Yes
		equal variance test (Brown-Forsythe test)	p = 0.8214	Are SDs significantly different?
				No
		ordinary 2-way ANOVA
		inj effect (row)	****p < 0.0001
		17D3 effect (column)	p = 0.3824
		inj x 17D3 interaction effect	p = 0.6697
		Tukey's multiple comparisons test
		ctrl:+/Y vs. inj:+/Y	**p = 0.0063
		ctrl:delta vs. inj:delta	**p = 0.0013
		ctrl:+/Y vs. ctrl:delta	p = 0.7878

## Sheet: Figure 7 - Supplement 3_Stat
Figure 7 - Supplement 3	normality test (Shapiro-Wilk test)		Passed normality test?
SD	17D1_Gal4_grp_ctrl	p = 0.8572	Yes
(n = 8)	17D1_Gal4_grp_inj	p = 0.9797	Yes
	TNT_grp_ctrl	p = 0.7271	Yes
	TNT_grp_inj	p = 0.0586	Yes
	17D1_TNT_grp_ctrl	p = 0.9909	Yes
	17D1_TNT_grp_inj	p = 0.6426	Yes
	equal variance test (Brown-Forsythe test)	p = 0.6427	Are SDs significantly different?
			No
Gal4/+ vs. Gal4>TNT	ordinary 2-way ANOVA (ctrl vs. inj)
	inj effect (row)	***p = 0.0005
	genotype effect (column)	****p < 0.0001
	inj x genotype interaction effect	***p = 0.0003
	Tukey's multiple comparisons test
	ctrl:17D1_Gal4 vs. ctrl:17D1_TNT	p = 0.7925
	ctrl:17D1_Gal4 vs. inj:17D1_Gal4	****p < 0.0001
	ctrl:17D1_TNT vs. inj:17D1_TNT	p = 0.9990
TNT/+ vs. Gal4>TNT	ordinary 2-way ANOVA (ctrl vs. inj)
	inj effect (row)	**p = 0.0020
	genotype effect (column)	****p < 0.0001
	inj x genotype interaction effect	**p = 0.0012
	Tukey's multiple comparisons test
	ctrl:TNT vs. ctrl:17D1_TNT	p = 0.4437
	ctrl:TNT vs. inj:TNT	***p = 0.0002
	ctrl:17D1_TNT vs. inj:17D1_TNT	p = 0.9987
